# Supplementary material for: Protein Phosphorylation Changes During Systemic Acquired Resistance in Arabidopsis thaliana
Source: Front Plant Sci. 2021 Nov 11;12:748287. doi: 10.3389/fpls.2021.748287 (PMC8632492; doi:10.3389/fpls.2021.748287)
Supplement: Supplementary Table 1 — List of DIA windows. [file Table_1.XLSX]

## Sheet: Sheet1
	Width（Da）	Start（Da）	End（Da）	Median（Da）
	26	400	425	412.5
	26	425	450	437.5
	11	450	460	455
	11	460	470	465
	11	470	480	475
	11	480	490	485
	11	490	500	495
	11	500	510	505
	11	510	520	515
	11	520	530	525
	11	530	540	535
	11	540	550	545
	11	550	560	555
	11	560	570	565
	11	570	580	575
	11	580	590	585
	11	590	600	595
	11	600	610	605
	11	610	620	615
	11	620	630	625
	11	630	640	635
	11	640	650	645
	11	650	660	655
	11	660	670	665
	11	670	680	675
	11	680	690	685
	11	690	700	695
	11	700	710	705
	11	710	720	715
	11	720	730	725
	11	730	740	735
	11	740	750	745
	11	750	760	755
	11	760	770	765
	11	770	780	775
	11	780	790	785
	11	790	800	795
	11	800	810	805
	11	810	820	815
	11	820	830	825
	11	830	840	835
	11	840	850	845
	11	850	860	855
	11	860	870	865
	11	870	880	875
	11	880	890	885
	11	890	900	895
	11	900	910	905
	11	910	920	915
	11	920	930	925
	11	930	940	935
	11	940	950	945
	26	950	975	962.5
	26	975	1000	987.5
	26	1000	1025	1012.5
	26	1025	1050	1037.5
	26	1050	1075	1062.5
	26	1075	1100	1087.5
	51	1100	1150	1125
	51	1150	1200	1175
