# Supplementary material for: Protein Phosphorylation Changes During Systemic Acquired Resistance in Arabidopsis thaliana
Source: Front Plant Sci. 2021 Nov 11;12:748287. doi: 10.3389/fpls.2021.748287 (PMC8632492; doi:10.3389/fpls.2021.748287)
Supplement: Supplementary Table 2 — Total phosphoproteins identified in this study. [file Table_2.XLSX]

## Sheet: unique phosphopeptides
Accession number in uniprot	Accession number in tair	PG.ProteinDescriptions	PG.Qvalue	PG.Cscore	PG.MolecularWeight	PEP.GroupingKey	EG.FoundInDB	EG.PrecursorId	EG.ModifiedSequence	EG.IntModifiedPeptide	EG.IsDecoy	SL-CK-1.EG.TotalQuantity	SL-CK-2.EG.TotalQuantity	SL-CK-3.EG.TotalQuantity	SL-V-1.EG.TotalQuantity	SL-V-2.EG.TotalQuantity	SL-V-3.EG.TotalQuantity	SL-CK-1.EG.Qvalue	SL-CK-2.EG.Qvalue	SL-CK-3.EG.Qvalue	SL-V-1.EG.Qvalue	SL-V-2.EG.Qvalue	SL-V-3.EG.Qvalue	SL-CK-1.EG.MeanApexRT	SL-CK-2.EG.MeanApexRT	SL-CK-3.EG.MeanApexRT	SL-V-1.EG.MeanApexRT	SL-V-2.EG.MeanApexRT	SL-V-3.EG.MeanApexRT	SL-CK-1.EG.PTMAssayProbability	SL-CK-2.EG.PTMAssayProbability	SL-CK-3.EG.PTMAssayProbability	SL-V-1.EG.PTMAssayProbability	SL-V-2.EG.PTMAssayProbability	SL-V-3.EG.PTMAssayProbability	SL-CK-1.EG.PTMAssayCandidateScore	SL-CK-2.EG.PTMAssayCandidateScore	SL-CK-3.EG.PTMAssayCandidateScore	SL-V-1.EG.PTMAssayCandidateScore	SL-V-2.EG.PTMAssayCandidateScore	SL-V-3.EG.PTMAssayCandidateScore
A0A178US29	AT5G14210	Leucine-rich repeat protein kinase family protein;Leucine-rich repeat protein kinase family protein;Leucine-rich repeat protein kinase family protein (Fragment)	0.000380028	0.801796	88931.4	EATDDFDSSR	TRUE	_EATDDFDS[Phospho]SR_.2	_EATDDFDS[Phospho]SR_	_EATDDFDS[+80]SR_	FALSE				28767.1		85833.3				0.00023916		0.00118086				36.3432		36.1475				0.838408		0.913414				6.82964		7.3282
A0A178VCD6	At3g01490	Protein kinase superfamily protein;AT3g01490/F4P13_4	2.36454e-22	0.909974	40037.4	SLDEQLQR	TRUE	_S[Phospho]LDEQLQR_.2	_S[Phospho]LDEQLQR_	_S[+80]LDEQLQR_	FALSE				35568.9		99033.4				0.00718605		0.00691175				46.5315		46.5718				1		1
A0A178VCR5	AT3G58050	Uncharacterized protein	0.0332659	0.659615	133420	QCLDGCPSPR	TRUE	_QC[Carbamidomethyl]LDGC[Carbamidomethyl]PS[Phospho]PR_.2	_QC[Carbamidomethyl]LDGC[Carbamidomethyl]PS[Phospho]PR_	_QC[+57]LDGC[+57]PS[+80]PR_	FALSE					138600	121579					0.00624982	0.00925347					37.4148	37.3708					1	1
A0A178W3M8	AT1G30270	CBL-interacting protein kinase 23;Non-specific serine/threonine protein kinase;CBL-interacting serine/threonine-protein kinase 23	0.013819	0.699851	42810.8	SGGDTLEFHK	TRUE	_SGGDT[Phospho]LEFHK_.2	_SGGDT[Phospho]LEFHK_	_SGGDT[+80]LEFHK_	FALSE				132529		210151				0.00461993		0.00950907				53.7513		53.7646				0.962981		0.969136				5.15663		4.69274
A0A1I9LNC1	AT3G24080	KRR1 family protein	2.02529e-20	0.90519	73758.5	VLSVAGFK	TRUE	_VLS[Phospho]VAGFK_.2	_VLS[Phospho]VAGFK_	_VLS[+80]VAGFK_	FALSE				4537.15		43937.4				0.00598368		0.000338676				70.2718		76.2857				1		1
A0A1I9LPZ1	AT3G24080	Uncharacterized protein	1.6358e-45	0.954654	236760	TVSGGSFENR	TRUE	_TVSGGS[Phospho]FENR_.2	_TVSGGS[Phospho]FENR_	_TVSGGS[+80]FENR_	FALSE				177923		134010				0.00015479		1.30626e-05				37.7117		37.6315				0.981765		0.802201				5.70604		3.09326
A0A1I9LPZ9	AT3G50370	DegP protease 7;Protease Do-like 7	5.75795e-05	0.847925	116291	LGSQASMATESVMK	TRUE	_LGS[Phospho]QASM[Oxidation]ATESVMK_.2	_LGS[Phospho]QASM[Oxidation]ATESVMK_	_LGS[+80]QASM[+16]ATESVMK_	FALSE				75778.8	116297	268122				0.0062305	0.000299748	0.00146028				61.8993	62.3549	62.2878				0.999356	0.986866	0.874688				26.3944	24.4776	24.7668
A0A1I9LQ49	AT3G22380	Time for coffee;Time for coffee;Protein TIME FOR COFFEE	4.78708e-22	0.909244	164584	ESNASLDSEKK	TRUE	_ESNASLDS[Phospho]EKK_.2	_ESNASLDS[Phospho]EKK_	_ESNASLDS[+80]EKK_	FALSE				48959.6	69506.5	21981.5				0.00421561	0.000735854	0.00072143				26.6365	26.4258	25.7497				0.841105	0.775186	0.769564				4.79148	3.73244	2.899
A0A1I9LQ49	AT3G22380	Time for coffee;Time for coffee;Protein TIME FOR COFFEE	4.78708e-22	0.909244	164584	SDPAIHDSQEK	TRUE	_S[Phospho]DPAIHDSQEK_.2	_S[Phospho]DPAIHDSQEK_	_S[+80]DPAIHDSQEK_	FALSE				95154.8	102654					0.00171901	0.000678117					31.2628	30.708					0.947121	0.989174					3.88542	5.51496
A0A1I9LS11	AT3G09600	Homeodomain-like superfamily protein;Homeodomain-like superfamily protein;Homeodomain-like superfamily protein;Protein REVEILLE 8	4.71025e-20	0.904273	26753.5	GLLNVSSPSTSGMGSSSR	TRUE	_GLLNVSS[Phospho]PSTSGMGSSSR_.2	_GLLNVSS[Phospho]PSTSGMGSSSR_	_GLLNVSS[+80]PSTSGMGSSSR_	FALSE				702233	102106					1.47382e-15	4.63789e-06					69.3629	69.4641					0.851916	0.757752					19.0139	12.3175
A0A1I9LT31	AT3G61690	Nucleotidyltransferase	1.05038e-18	0.900861	139217	YANETPR	TRUE	_YANET[Phospho]PR_.2	_YANET[Phospho]PR_	_YANET[+80]PR_	FALSE				12140.3	16688.4					0.00848214	0.00144336					24.987	24.9632					0.94607	0.85036					3.86464	2.73743
A0A1I9LTA1	At3g48060	BAH and TFIIS domain-containing protein	4.99756e-20	0.904206	172358	SMNSPTTSQPK	TRUE	_SM[Oxidation]NS[Phospho]PTTSQPK_.2	_SM[Oxidation]NS[Phospho]PTTSQPK_	_SM[+16]NS[+80]PTTSQPK_	FALSE				73203.7	135228					0.00128935	0.00165064					19.6271	19.5329					0.948733	0.951786					11.4592	11.4587
A0A1P8AM23	AT1G18700	DNAJ heat shock N-terminal domain-containing protein;DNAJ heat shock N-terminal domain-containing protein;DNAJ heat shock N-terminal domain-containing protein;At1g18700/F6A14_19	1.66364e-12	0.884482	83788.4	DAVQILSSGSDSD	TRUE	_DAVQILSSGSDS[Phospho]D_.2	_DAVQILSSGSDS[Phospho]D_	_DAVQILSSGSDS[+80]D_	FALSE				74090.2	54147.5					0.000262728	0.0036436					70.6913	70.502					0.948177	0.981871					5.00532	6.09054
A0A1P8AMX7	AT1G45207	Remorin family protein	1.97197e-07	0.866113	60179.4	SPPNAGFLPLYSGR	TRUE	_S[Phospho]PPNAGFLPLYSGR_.2	_S[Phospho]PPNAGFLPLYSGR_	_S[+80]PPNAGFLPLYSGR_	FALSE				482267	130288					0.000290675	0.000101987					93.0294	93.2715					0.997845	0.945673					10.8118	7.16182
A0A1P8AND3	AT1G75310	Auxin-like 1 protein;Auxilin-like protein 1	5.61803e-11	0.879822	162175	KSPEMVR	TRUE	_KS[Phospho]PEMVR_.2	_KS[Phospho]PEMVR_	_KS[+80]PEMVR_	FALSE				367474	549075					4.31598e-26	1.65866e-09					33.665	33.0332					1	1
A0A1P8ANP2	AT1G75150	DNA ligase-like protein	0.000528948	0.79408	88543	GNSDPEIHDSPGDPVR	TRUE	_GNS[Phospho]DPEIHDS[Phospho]PGDPVR_.2	_GNS[Phospho]DPEIHDS[Phospho]PGDPVR_	_GNS[+80]DPEIHDS[+80]PGDPVR_	FALSE				21247.2	33448.7	23015.4				0.00968871	0.00671515	0.00277423				48.8187	48.8081	48.8902				1	1	1
A0A1P8ANR5	AT1G08680	ARF GAP-like zinc finger-containing protein ZIGA4;ARF GAP-like zinc finger-containing protein ZIGA4;Probable ADP-ribosylation factor GTPase-activating protein AGD14	2.00435e-26	0.919418	64506.8	FSDHMFEDQFSNEDSAPR	TRUE	_FSDHM[Oxidation]FEDQFS[Phospho]NEDSAPR_.3	_FSDHM[Oxidation]FEDQFS[Phospho]NEDSAPR_	_FSDHM[+16]FEDQFS[+80]NEDSAPR_	FALSE				16569.7	24789.1					0.000287993	0.00201333					76.2284	78.6053					0.936526	0.986646					11.5802	14.6778
A0A1P8AP47	AT1G70180	Sterile alpha motif (SAM) domain-containing protein;Sterile alpha motif (SAM) domain-containing protein;Sterile alpha motif (SAM) domain-containing protein;Sterile alpha motif (SAM) domain-containing protein;At1g70180	2.57762e-22	0.909884	48640.7	GEASFSGNDLQISR	TRUE	_GEASFS[Phospho]GNDLQISR_.2	_GEASFS[Phospho]GNDLQISR_	_GEASFS[+80]GNDLQISR_	FALSE				244294		250058				0.000100136		1.21768e-16				67.3262		67.5783				0.973501		0.946911				13.7509		13.6233
A0A1P8AP88	AT1G18160	Protein kinase superfamily protein	3.53301e-23	0.911948	103709	NQSNLGPVR	TRUE	_NQS[Phospho]NLGPVR_.2	_NQS[Phospho]NLGPVR_	_NQS[+80]NLGPVR_	FALSE				214654	119483	165360				0.00492258	0.00342354	0.0049468				39.0214	38.8701	35.9687				1	1	1
A0A1P8APW9	AT1G07650	Non-specific serine/threonine protein kinase;Non-specific serine/threonine protein kinase;Probable LRR receptor-like serine/threonine-protein kinase At1g07650;Non-specific serine/threonine protein kinase	5.18201e-37	0.94024	110027	TASANSLVDAEEK	TRUE	_T[Phospho]AS[Phospho]ANS[Phospho]LVDAEEK_.2	_T[Phospho]AS[Phospho]ANS[Phospho]LVDAEEK_	_T[+80]AS[+80]ANS[+80]LVDAEEK_	FALSE				97542.4	101149	87683.2				0.000497713	0.00565924	0.00287472				58.0936	57.8074	58.2319				1	1	1
A0A1P8AQ16	AT1G27460	No pollen germination related 1;No pollen germination related 1;Protein NPGR1	1.321e-15	0.892904	76429.9	FEDQPGSPESLATR	TRUE	_FEDQPGS[Phospho]PES[Phospho]LAT[Phospho]R_.2	_FEDQPGS[Phospho]PES[Phospho]LAT[Phospho]R_	_FEDQPGS[+80]PES[+80]LAT[+80]R_	FALSE				279825	467329					0.000285099	0.00159811					60.0318	59.7475					1	1
A0A1P8AQG3	AT1G19650	Sec14p-like phosphatidylinositol transfer family protein;Phosphatidylinositol/phosphatidylcholine transfer protein SFH4	0.00647404	0.729212	50781.1	SGSELEEMASPK	TRUE	_SGSELEEMAS[Phospho]PK_.2	_SGSELEEMAS[Phospho]PK_	_SGSELEEMAS[+80]PK_	FALSE				27472.1	85258.2					0.00929738	0.00100257					56.3585	56.4404					0.968448	0.7999					5.72339	3.07882
A0A1P8AQI9	AT1G24300	GYF domain-containing protein	1.16947e-35	0.9378	150123	MMSFEAQDR	TRUE	_M[Oxidation]M[Oxidation]S[Phospho]FEAQDR_.2	_M[Oxidation]M[Oxidation]S[Phospho]FEAQDR_	_M[+16]M[+16]S[+80]FEAQDR_	FALSE				47268.5	53032.2	76609.3				0.000585888	6.87326e-05	0.00272444				36.9116	36.6984	36.9002				1	1	1
A0A1P8ARB7	AT1G02080	Transcription regulator	4.68772e-09	0.873107	263892	SGSSESLQQLIDIIR	TRUE	_SGS[Phospho]SESLQQLIDIIR_.2	_SGS[Phospho]SESLQQLIDIIR_	_SGS[+80]SESLQQLIDIIR_	FALSE					109604	29783					0.000385849	0.00136848					115.162	115.193					0.924231	0.957894					13.024	15.0295
A0A1P8ARG8	At1g18950	DDT domain superfamily;DDT domain superfamily;DDT domain-containing protein DDR4	1.40652e-09	0.875052	86963.7	STSSTHPTEPVNDTASGR	TRUE	_STSSTHPTEPVNDTAS[Phospho]GR_.3	_STSSTHPTEPVNDTAS[Phospho]GR_	_STSSTHPTEPVNDTAS[+80]GR_	FALSE				430712	378935					9.4711e-16	8.98125e-10					35.7386	35.6328					0.966212	0.75636					30.8902	24.3137
A0A1P8ARN1	AT1G60200	Splicing factor PWI domain-containing protein / RNA recognition motif (RRM)-containing protein	3.46866e-10	0.877199	85987.8	LGFGLVGSGK	TRUE	_LGFGLVGS[Phospho]GK_.2	_LGFGLVGS[Phospho]GK_	_LGFGLVGS[+80]GK_	FALSE				2135.18		6553.33				0.00230617		0.00579622				79.0766		79.609				1		1
A0A1P8ARR1	AT1G80810	Tudor/PWWP/MBT superfamily protein	1.22037e-27	0.922055	93511.2	EQSQDKGVEAETK	TRUE	_EQS[Phospho]QDKGVEAETK_.2	_EQS[Phospho]QDKGVEAETK_	_EQS[+80]QDKGVEAETK_	FALSE				166260	122527					0.00316681	0.00158263					30.1826	29.6906					0.973182	0.999256					4.59149	8.20294
A0A1P8ASK1	AT1G79570	Kinase superfamily with octicosapeptide/Phox/Bem1p domain-containing protein	1.46852e-24	0.915183	128910	TNSSLHEFGNK	TRUE	_TNS[Phospho]S[Phospho]LHEFGNK_.2	_TNS[Phospho]S[Phospho]LHEFGNK_	_TNS[+80]S[+80]LHEFGNK_	FALSE					128385	134413					0.00234229	0.000849798					43.5817	43.5251					0.955724	0.809185					4.02458	2.17578
A0A1P8ASK1	AT1G79570	Kinase superfamily with octicosapeptide/Phox/Bem1p domain-containing protein	1.46852e-24	0.915183	128910	DGGGTGSIPPALENEQMK	TRUE	_DGGGT[Phospho]GSIPPALENEQMK_.2	_DGGGT[Phospho]GSIPPALENEQMK_	_DGGGT[+80]GSIPPALENEQMK_	FALSE				737633		386637				0.000166263		8.87484e-12				66.5678		66.6979				0.929006		0.96571				3.57152		4.33801
A0A1P8AT01	AT1G11660	Heat shock protein 70 (Hsp 70) family protein;Heat shock 70 kDa protein 16	0.000159028	0.838871	81263	GPINTPSNELLFPK	TRUE	_GPINT[Phospho]PSNELLFPK_.2	_GPINT[Phospho]PSNELLFPK_	_GPINT[+80]PSNELLFPK_	FALSE				61623.5	101572					4.8649e-12	0.00745851					88.4969	88.9452					0.857182	0.776712					2.79208	2.24661
A0A1P8AT29	AT1G54360	TBP-ASSOCIATED FACTOR 6B (Fragment);TBP-ASSOCIATED FACTOR 6B;TBP-ASSOCIATED FACTOR 6B;Transcription initiation factor TFIID subunit 6b	0.000256328	0.826308	60748.4	KASSDNLTHQPPLK	TRUE	_KAS[Phospho]SDNLTHQPPLK_.3	_KAS[Phospho]SDNLTHQPPLK_	_KAS[+80]SDNLTHQPPLK_	FALSE					642267	376622					0.00086179	0.00381757					56.5556	57.4567					0.868205	0.899721					3.91285	7.06718
A0A1P8ATC8	AT1G24764	Microtubule-associated proteins 70-2;Microtubule-associated proteins 70-2;Microtubule-associated protein 70-2	4.56411e-23	0.911678	77124.2	SMSNGPSR	TRUE	_SMS[Phospho]NGPSR_.2	_SMS[Phospho]NGPSR_	_SMS[+80]NGPSR_	FALSE				84087.4		112877				0.000342776		0.000301346				20.914		20.6745				0.970094		0.976244				10.3217		10.082
A0A1P8ATG6	AT1G33050	Uncharacterized protein;Uncharacterized protein;Uncharacterized protein;Uncharacterized protein At1g33050	4.27744e-29	0.925114	72256	SLSSTFPSSSGEFDLTDPPLEDGR	TRUE	_SLS[Phospho]STFPSSSGEFDLTDPPLEDGR_.3	_SLS[Phospho]STFPSSSGEFDLTDPPLEDGR_	_SLS[+80]STFPSSSGEFDLTDPPLEDGR_	FALSE					2229563	2.14174e+06					5.18275e-08	1.26755e-09					103.418	103.734					0.762003	0.763557					17.2778	17.2415
A0A1P8AU89	AT1G63480	AT-hook motif nuclear-localized protein;AT-hook motif nuclear-localized protein 12	1.09877e-13	0.887797	37652	DSSPMSDPNEPK	TRUE	_DSS[Phospho]PM[Oxidation]SDPNEPK_.2	_DSS[Phospho]PM[Oxidation]SDPNEPK_	_DSS[+80]PM[+16]SDPNEPK_	FALSE				117075		142954				1.76251e-13		0.00118717				23.216		23.0707				0.982594		0.880886				20.108		8.14922
A0A1P8AWI5	AT1G52290	Protein kinase superfamily protein;Proline-rich receptor-like protein kinase PERK15	0.00557742	0.734777	42008.7	EDIEASINR	TRUE	_EDIEAS[Phospho]INR_.2	_EDIEAS[Phospho]INR_	_EDIEAS[+80]INR_	FALSE				749805	718151					0.000358959	0.00265241					45.66	45.7164					1	1
A0A1P8AWJ5	AT1G09000	NPK1-related protein kinase 1;Mitogen-activated protein kinase kinase kinase ANP1	0.00324003	0.751637	67977.8	GPLGGSPSR	TRUE	_GPLGGS[Phospho]PSR_.2	_GPLGGS[Phospho]PSR_	_GPLGGS[+80]PSR_	FALSE					93046.6	115093					0.00417889	0.000414241					32.5083	32.636					0.859121	0.99294					2.80801	5.94626
A0A1P8AYB1	AT2G17840	Senescence/dehydration-associated protein-like protein;Protein EARLY-RESPONSIVE TO DEHYDRATION 7, chloroplastic	2.27477e-17	0.897437	43055.5	EISHDSSDEEDGDGGK	TRUE	_EISHDSS[Phospho]DEEDGDGGK_.2	_EISHDSS[Phospho]DEEDGDGGK_	_EISHDSS[+80]DEEDGDGGK_	FALSE					350521	439944					0.00109717	0.00128787					26.6529	26.509					0.974964	0.998228					10.8321	13.3661
A0A1P8AYZ7	AT2G41830	Uncharacterized protein	1.3592e-06	0.861621	98884.6	TASVFSSSAALFEK	TRUE	_TAS[Phospho]VFSSSAALFEK_.2	_TAS[Phospho]VFSSSAALFEK_	_TAS[+80]VFSSSAALFEK_	FALSE				326309	308034					7.31963e-14	6.89336e-05					95.5801	95.7757					0.967583	0.750178					10.1079	9.80254
A0A1P8AZ84	AT2G39480	p-glycoprotein 6;ABC transporter B family member 6	2.07867e-09	0.874435	136145	SQELCFNSEESPNDHSPAPEK	TRUE	_SQELC[Carbamidomethyl]FNSEES[Phospho]PNDHSPAPEK_.3	_SQELC[Carbamidomethyl]FNSEES[Phospho]PNDHSPAPEK_	_SQELC[+57]FNSEES[+80]PNDHSPAPEK_	FALSE				2.98482e+06		938238				0.000363786		0.000344565				58.8045		59.9895				0.842628		0.806457				16.2268		15.3005
A0A1P8B0X3	AT2G34680	Outer arm dynein light chain 1 protein;187-kDa microtubule-associated protein AIR9	5.02853e-24	0.913945	194134	SPESVSAVSVVSNR	TRUE	_SPESVS[Phospho]AVS[Phospho]VVS[Phospho]NR_.2	_SPESVS[Phospho]AVS[Phospho]VVS[Phospho]NR_	_SPESVS[+80]AVS[+80]VVS[+80]NR_	FALSE					275579	33365.6					0.00347667	0.00887529					57.4431	59.8358					0.976689	0.860172					11.6562	11.5179
A0A1P8B1S9	AT2G28150	UPSTREAM OF FLC protein (DUF966)	8.10851e-12	0.882444	50716.9	HSHEDDELSPPALR	TRUE	_HSHEDDELS[Phospho]PPALR_.2	_HSHEDDELS[Phospho]PPALR_	_HSHEDDELS[+80]PPALR_	FALSE				61121.6	80617.3					0.00182795	0.000321062					96.1991	98.7735					0.759956	0.947671					2.4822	3.89646
A0A1P8B1V4	AT2G20950	Phospholipase-like protein (PEARLI 4) family protein	1.609e-21	0.907937	62510.5	NRPSSPFHPSQSR	TRUE	_NRPSS[Phospho]PFHPSQSR_.3	_NRPSS[Phospho]PFHPSQSR_	_NRPSS[+80]PFHPSQSR_	FALSE				1259574		1.92971e+06				7.85501e-10		2.29566e-19				52.0713		54.5398				0.822244		0.856441				8.56914		8.67647
A0A1P8B350	AT4G02110	Transcription coactivator;BRCT domain-containing protein At4g02110	0.000210388	0.833408	132054	SPETDTLGK	TRUE	_S[Phospho]PETDTLGK_.2	_S[Phospho]PETDTLGK_	_S[+80]PETDTLGK_	FALSE				167843	5280649	10284016				0.00687967	0.00880575	0.000367784				33.4099	33.07	33.0274				0.995138	0.980844	0.984216				7.01452	5.62896	5.82602
A0A1P8B479	At4g35240	DNA-directed RNA polymerase subunit beta, putative (DUF630 and DUF632);DNA-directed RNA polymerase subunit beta, putative (DUF630 and DUF632)	1.27815e-10	0.878659	93825.6	SGASTSGGGDVGDASAYQSRPSVSVEK	TRUE	_SGASTSGGGDVGDASAYQSRPS[Phospho]VSVEK_.3	_SGASTSGGGDVGDASAYQSRPS[Phospho]VSVEK_	_SGASTSGGGDVGDASAYQSRPS[+80]VSVEK_	FALSE				1.05181e+06	1.19189e+06					0.000227703	1.03707e-05					53.7226	54.1129					0.836928	0.833997					20.1613	18.7551
A0A1P8B4D5	AT4G27240	Zinc finger (C2H2 type) family protein;At4g27240	0.00854666	0.718706	47250.7	PLCSSPR	TRUE	_PLC[Carbamidomethyl]SS[Phospho]PR_.2	_PLC[Carbamidomethyl]SS[Phospho]PR_	_PLC[+57]SS[+80]PR_	FALSE				68235.8	87964					0.000987631	0.00120527					27.7765	27.7805					0.862216	0.800803					2.83382	2.39132
A0A1P8B509	AT4G30340	Diacylglycerol kinase (ATP);Diacylglycerol kinase 7	2.10367e-09	0.874415	41192.3	SVGEASTTNFVAAR	TRUE	_S[Phospho]VGEAS[Phospho]TTNFVAAR_.2	_S[Phospho]VGEAS[Phospho]TTNFVAAR_	_S[+80]VGEAS[+80]TTNFVAAR_	FALSE				161815	135997	191695				0.000222552	4.68283e-05	0.00031664				63.0996	63.0488	63.1975				0.986165	0.988123	0.990206				11.583	10.5902	11.581
A0A1P8B6K1	AT4G24680	Modifier of snc1;Protein MODIFIER OF SNC1 1	1.39871e-19	0.903079	153775	SSLNAWGTSSLSPR	TRUE	_SSLNAWGTSSLS[Phospho]PR_.2	_SSLNAWGTSSLS[Phospho]PR_	_SSLNAWGTSSLS[+80]PR_	FALSE				4985529	5.17304e+06	5323711				1.8597e-13	2.70016e-09	1.77612e-10				73.5522	73.829	74.0367				0.99448	0.997922	0.940452				26.2541	28.7339	36.1052
A0A1P8B770	AT4G17330	G2484-1 protein	4.69553e-27	0.920798	214199	NTTASDMESDESAENR	TRUE	_NTTASDMES[Phospho]DESAENR_.2	_NTTASDMES[Phospho]DESAENR_	_NTTASDMES[+80]DESAENR_	FALSE					217107	172684					0.00021885	0.000367023					37.6388	37.4718					0.948612	0.809175					17.2837	17.6237
A0A1P8B770	AT4G17330	G2484-1 protein	4.69553e-27	0.920798	214199	SLVATPETPLQSR	TRUE	_SLVATPET[Phospho]PLQSR_.2	_SLVATPET[Phospho]PLQSR_	_SLVATPET[+80]PLQSR_	FALSE				298419	394444	464641				0.00138282	0.00122877	0.00131396				59.823	60.1229	60.1784				0.938829	0.975666	0.975963				10.2607	13.2129	11.5055
A0A1P8B7M4	AT4G08510	Mediator of RNA polymerase II transcription subunit-like protein;At4g08510	2.30904e-08	0.870327	59041.4	ELVASDPSSPQAAER	TRUE	_ELVAS[Phospho]DPSS[Phospho]PQAAER_.2	_ELVAS[Phospho]DPSS[Phospho]PQAAER_	_ELVAS[+80]DPSS[+80]PQAAER_	FALSE				220663	260460	225262				5.62251e-13	6.01923e-07	1.0087e-08				47.7816	47.7559	47.8993				0.974063	0.999614	0.750736				5.36651	8.85813	4.2156
A0A1P8B8D1	AT4G19100	PAM68-like protein (DUF3464);Protein PAM68, chloroplastic	1.26576e-06	0.861802	17233.5	PGNQSDEDDDDEDEDDDDEEDERER	TRUE	_PGNQS[Phospho]DEDDDDEDEDDDDEEDERER_.3	_PGNQS[Phospho]DEDDDDEDEDDDDEEDERER_	_PGNQS[+80]DEDDDDEDEDDDDEEDERER_	FALSE					375209	277866					0.00141183	0.00482995					36.5399	36.2656					1	1
A0A1P8B957	AT4G30710	QWRF motif protein (DUF566);AUGMIN subunit 8	0.000263567	0.824655	66019.6	LLSAGSLDR	TRUE	_LLSAGS[Phospho]LDR_.2	_LLSAGS[Phospho]LDR_	_LLSAGS[+80]LDR_	FALSE					276144	160093					7.02971e-05	0.000199021					58.3046	58.3757					0.996201	0.999202					6.56909	8.13221
A0A1P8B9H2	AT5G01400	HEAT repeat-containing protein	9.30115e-20	0.903522	140784	SEMSQSQNSPIDTGR	TRUE	_SEMS[Phospho]QSQNS[Phospho]PIDTGR_.2	_SEMS[Phospho]QSQNS[Phospho]PIDTGR_	_SEMS[+80]QSQNS[+80]PIDTGR_	FALSE				331788		317419				0.00012336		1.13519e-06				42.6882		42.7723				0.96638		0.936808				29.2111		33.5724
A0A1P8B9T9	AT5G46270	ADP-ribosyl cyclase/cyclic ADP-ribose hydrolase	0.000604897	0.791292	128474	TQSIDKPGK	TRUE	_TQS[Phospho]IDKPGK_.2	_TQS[Phospho]IDKPGK_	_TQS[+80]IDKPGK_	FALSE				54415.3	58618.6					0.00746713	0.00137621					27.1846	26.9588					0.819397	0.798716					2.51227	2.37829
A0A1P8BAP6	AT5G28290	NIMA-related kinase 3;Serine/threonine-protein kinase Nek3	0.0207496	0.681689	62149.2	SVSFGPSR	TRUE	_S[Phospho]VSFGPSR_.2	_S[Phospho]VSFGPSR_	_S[+80]VSFGPSR_	FALSE					12772.8	17449.4					0.005572	0.00381181					48.6614	48.5591					0.922154	0.995104					6.26504	8.74653
A0A1P8BB14	AT5G42870	Phosphatidate phosphatase;Phosphatidate phosphatase;Phosphatidate phosphatase PAH2	1.18066e-26	0.919932	96639.9	TEALAEDAVSGSDLDSK	TRUE	_TEALAEDAVSGS[Phospho]DLDSK_.2	_TEALAEDAVSGS[Phospho]DLDSK_	_TEALAEDAVSGS[+80]DLDSK_	FALSE					345799	303753					1.47699e-09	1.28547e-09					63.6066	63.8019					0.862379	0.771687					14.2588	10.3964
A0A1P8BBL5	AT5G47430	DWNN domain, a CCHC-type zinc finger;E3 ubiquitin ligase PQT3-like	1.4871e-12	0.884623	100848	SEPPSSEPPVPATK	TRUE	_SEPPS[Phospho]SEPPVPATK_.2	_SEPPS[Phospho]SEPPVPATK_	_SEPPS[+80]SEPPVPATK_	FALSE				947544		2.0371e+06				0.000110639		4.81898e-08				43.1871		43.2865				0.914864		0.94629				12.4738		13.0628
A0A1P8BD82	AT5G07740	Formin-like protein;Formin-like protein;Formin-like protein 20	2.84205e-05	0.851599	175802	INSAPASITTSLK	TRUE	_INS[Phospho]APASITTSLK_.2	_INS[Phospho]APASITTSLK_	_INS[+80]APASITTSLK_	FALSE				188147	9563.77	184145				0.000197641	0.00162315	6.96864e-06				63.7181	63.8215	64.1555				0.973996	0.7907	0.911083				6.00946	3.71544	4.71323
A0A1P8BD90	AT5G53440	LOW protein: zinc finger CCCH domain protein	7.28768e-34	0.934538	132101	SVEAGSNLTSPAK	TRUE	_S[Phospho]VEAGS[Phospho]NLT[Phospho]SPAK_.2	_S[Phospho]VEAGS[Phospho]NLT[Phospho]SPAK_	_S[+80]VEAGS[+80]NLT[+80]SPAK_	FALSE				193069		215263				0.000107853		0.00534324				42.0793		42.2412				0.882783		0.834562				8.72793		7.08717
A0A1P8BD90	AT5G53440	LOW protein: zinc finger CCCH domain protein	7.28768e-34	0.934538	132101	ELHASSPK	TRUE	_ELHASS[Phospho]PK_.2	_ELHASS[Phospho]PK_	_ELHASS[+80]PK_	FALSE				3.06361e+06	3.61133e+06					6.52129e-12	4.8948e-12					26.5019	26.2908					1	0.999993					36.0796	40.1029
A0A1P8BEZ4	AT5G03780	TRF-like 10;TRF-like 10;TRF-like 10 (Fragment)	0.0222519	0.678363	40726.3	VIDEVGASEK	TRUE	_VIDEVGAS[Phospho]EK_.2	_VIDEVGAS[Phospho]EK_	_VIDEVGAS[+80]EK_	FALSE				69799.6	69718.5					0.0034778	0.00651792					39.1787	38.9813					1	1
A0A1P8BFB6	AT5G43870	Auxin canalization protein (DUF828);At5g43870	3.46671e-11	0.880497	40981.4	IMAQSPEISSPR	TRUE	_IM[Oxidation]AQS[Phospho]PEISS[Phospho]PR_.2	_IM[Oxidation]AQS[Phospho]PEISS[Phospho]PR_	_IM[+16]AQS[+80]PEISS[+80]PR_	FALSE				529873	713647					5.18052e-09	1.60665e-15					42.6941	42.6815					0.87227	0.97181					17.6767	22.3264
A0A1P8BFZ5	AT5G58040	FIP1[V]-like protein	3.9877e-12	0.883372	133078	HKENASSGDEIHDSK	TRUE	_HKENAS[Phospho]S[Phospho]GDEIHDSK_.3	_HKENAS[Phospho]S[Phospho]GDEIHDSK_	_HKENAS[+80]S[+80]GDEIHDSK_	FALSE				508707	131144					0.00246518	0.0010821					42.07	41.6589					0.770724	0.995843					1.85932	6.47457
A0A1P8BG17	AT5G63950	Chromatin remodeling 24;Protein CHROMATIN REMODELING 24	0.0189408	0.685962	120914	INISPVDDK	TRUE	_INIS[Phospho]PVDDK_.2	_INIS[Phospho]PVDDK_	_INIS[+80]PVDDK_	FALSE				36584.9		51278.3				0.00325848		0.00474221				52.9026		49.8607				1		1
A0A1P8BGF9	AT5G56850	Uncharacterized protein	3.52839e-18	0.899508	61239.2	SMSDSNLNNVR	TRUE	_S[Phospho]MS[Phospho]DSNLNNVR_.2	_S[Phospho]MS[Phospho]DSNLNNVR_	_S[+80]MS[+80]DSNLNNVR_	FALSE					6011.37	7892.98					0.00212376	0.00442034					49.5415	49.6548					0.969914	0.834647					4.44164	2.39814
A0A1P8BGR8	AT5G48610	Myb-like protein X	0.00913476	0.716193	55190.1	AFENSPIEETSHR	TRUE	_AFENS[Phospho]PIEETSHR_.3	_AFENS[Phospho]PIEETSHR_	_AFENS[+80]PIEETSHR_	FALSE				17160.6		9932.4				0.00594557		0.00163953				51.198		51.6252				0.945056		0.876724				4.53808		3.65491
A0A1P8BH17	AT5G44090	Calcium-binding EF-hand family protein;Serine/threonine protein phosphatase 2A regulatory subunit B''alpha	1.68879e-15	0.892626	66441.9	TSPSLQSPLK	TRUE	_TSPSLQS[Phospho]PLK_.2	_TSPSLQS[Phospho]PLK_	_TSPSLQS[+80]PLK_	FALSE				977848	916456	1036724				3.00782e-09	2.09821e-06	4.10306e-11				54.7008	54.6766	54.6982				0.998716	0.984937	0.796734				12.4306	11.6426	8.00733
A0A1P8BH90	AT5G63480	Mediator of RNA polymerase II transcription subunit;Mediator of RNA polymerase II transcription subunit 30	8.53103e-05	0.845289	18594.6	ASEMQNGLGSPESEDEIEK	TRUE	_ASEMQNGLGS[Phospho]PESEDEIEK_.2	_ASEMQNGLGS[Phospho]PESEDEIEK_	_ASEMQNGLGS[+80]PESEDEIEK_	FALSE				169839	201263					0.000307019	0.00102114					61.0738	61.1446					0.988479	0.862719					7.74535	4.57261
A0A1P8BHA6	AT5G44070	Glutathione gamma-glutamylcysteinyltransferase;Glutathione gamma-glutamylcysteinyltransferase 1	4.00089e-10	0.876986	50594.1	ACCQGAEILSGSPSK	TRUE	_AC[Carbamidomethyl]C[Carbamidomethyl]QGAEILSGS[Phospho]PSK_.2	_AC[Carbamidomethyl]C[Carbamidomethyl]QGAEILSGS[Phospho]PSK_	_AC[+57]C[+57]QGAEILSGS[+80]PSK_	FALSE				3.09435e+06	3.07692e+06	3.10631e+06				1.29525e-16	4.1245e-14	1.24104e-13				51.8534	52.1208	52.0505				0.959268	0.996862	0.986116				33.1061	29.2473	38.6745
A0A2H1ZEH5	AT3G04630	WVD2-like 1;Protein WVD2-like 1	3.15356e-26	0.918979	32440.3	SLSENAPNVGSAER	TRUE	_SLS[Phospho]ENAPNVGSAER_.2	_SLS[Phospho]ENAPNVGSAER_	_SLS[+80]ENAPNVGSAER_	FALSE				189006		229451				0.000108114		0.000288867				49.5439		49.5391				0.974457		0.869033				25.1407		22.7755
A0A2H1ZEH5	AT3G04630	WVD2-like 1;Protein WVD2-like 1	3.15356e-26	0.918979	32440.3	SLSENAPNVGSAER	TRUE	_SLSENAPNVGS[Phospho]AER_.2	_SLSENAPNVGS[Phospho]AER_	_SLSENAPNVGS[+80]AER_	FALSE				290236	262171	298388				9.41486e-05	7.41199e-10	2.67834e-12				47.2714	47.553	47.5119				0.998902	1	1				12.2922	22.5361	20.3248
A0A2H1ZEJ0	At3g45850	P-loop containing nucleoside triphosphate hydrolases superfamily protein;Kinesin-like protein KIN-5D	2.0515e-12	0.884216	119859	GGIVSLSPAQTPR	TRUE	_GGIVSLSPAQT[Phospho]PR_.2	_GGIVSLSPAQT[Phospho]PR_	_GGIVSLSPAQT[+80]PR_	FALSE				289637	300413	334336				1.68192e-10	1.00535e-12	1.329e-19				63.9625	64.1892	64.3541				0.988641	0.941732	0.996817				7.67591	9.05171	12.8932
A4GSN8	AT1G79280	Nuclear-pore anchor	1.282e-31	0.930199	237040	EEVQPETLATPTQSPSR	TRUE	_EEVQPETLAT[Phospho]PTQS[Phospho]PSR_.2	_EEVQPETLAT[Phospho]PTQS[Phospho]PSR_	_EEVQPETLAT[+80]PTQS[+80]PSR_	FALSE					6.18847e+06	6782352					1.39243e-16	4.2379e-17					53.0202	53.088					0.998266	0.93542					26.8686	22.2946
A8MQI6	AT4G00440	GPI-anchored adhesin-like protein, putative (DUF3741);GPI-anchored adhesin-like protein, putative (DUF3741);GPI-anchored adhesin-like protein, putative (DUF3741)	1.21218e-20	0.90575	94975.7	GSSPDSHLMGNK	TRUE	_GSS[Phospho]PDSHLM[Oxidation]GNK_.2	_GSS[Phospho]PDSHLM[Oxidation]GNK_	_GSS[+80]PDSHLM[+16]GNK_	FALSE				76628.3		34265.7				0.00933254		0.00173422				31.0636		30.3755				0.980718		0.979384				12.9416		9.8761
A8MQX0	AT1G23080	Auxin efflux carrier component;Auxin efflux carrier component 7	4.07548e-14	0.888975	67159.7	SFYGGGGTNMTPR	TRUE	_S[Phospho]FYGGGGTNM[Oxidation]TPR_.2	_S[Phospho]FYGGGGTNM[Oxidation]TPR_	_S[+80]FYGGGGTNM[+16]TPR_	FALSE					1.59276e+06	1.65699e+06					1.21715e-06	2.16465e-14					46.9502	46.8164					0.837742	0.994845					16.1	25.8258
A8MR97	AT3G60240	Eukaryotic translation initiation factor 4G	1.94471e-25	0.917215	187551	TTSAPPNMDDQK	TRUE	_TTS[Phospho]APPNM[Oxidation]DDQK_.2	_TTS[Phospho]APPNM[Oxidation]DDQK_	_TTS[+80]APPNM[+16]DDQK_	FALSE				494370	630935	666251				0.000202872	7.92847e-09	1.06572e-07				20.6732	20.5843	20.4785				0.817564	0.995834	0.92187				19.2523	27.11	16.9012
A8MR97	AT3G60240	Eukaryotic translation initiation factor 4G	1.94471e-25	0.917215	187551	TTSAPPNMDDQK	TRUE	_TTS[Phospho]APPNMDDQK_.2	_TTS[Phospho]APPNMDDQK_	_TTS[+80]APPNMDDQK_	FALSE				4.95418e+06	5415242	5822950				3.16556e-11	9.72649e-10	0.000224945				33.5919	33.3756	33.2093				0.999834	0.99379	0.984494				10.3995	8.94697	5.84402
A8MSG1	AT2G23930	Putative small nuclear ribonucleoprotein G;Probable small nuclear ribonucleoprotein G;Small nuclear ribonucleoprotein G	0.000287	0.817111	5796.58	GNSIVTVEALEPVGR	TRUE	_GNS[Phospho]IVTVEALEPVGR_.2	_GNS[Phospho]IVTVEALEPVGR_	_GNS[+80]IVTVEALEPVGR_	FALSE				1	1	7807.51				8.64593e-09	4.33947e-07	0.00504374				85.2175	85.426	85.5984				0.979767	0.990893	0.939596				4.87998	5.68962	3.74439
B3H684	AT4G26110	Nucleosome assembly protein11;Nucleosome assembly protein 1;1	0.00283703	0.754841	41607.9	SDVLENLTPNVR	TRUE	_S[Phospho]DVLENLTPNVR_.2	_S[Phospho]DVLENLTPNVR_	_S[+80]DVLENLTPNVR_	FALSE				36098.1	52890.5					0.00512415	0.000751758					83.0733	83.4633					0.994766	0.991352					6.24737	5.74171
B9DFN3	AT1G70100	AT1G70100 protein;Neurofilament heavy protein;Neurofilament heavy protein	1.30736e-16	0.895503	53480.3	STDDGQDTAPK	TRUE	_S[Phospho]TDDGQDTAPK_.2	_S[Phospho]TDDGQDTAPK_	_S[+80]TDDGQDTAPK_	FALSE				242415		344628				1.30881e-08		6.42005e-08				19.8486		19.2578				0.838916		0.87214				17.4375		14.4232
B9DFW5	AT3G26910	AT3G26910 protein;Hydroxyproline-rich glycoprotein family protein;Hydroxyproline-rich glycoprotein family protein	5.41017e-15	0.891306	68220.6	VSPTASPPPASSPR	TRUE	_VS[Phospho]PTASPPPASSPR_.2	_VS[Phospho]PTASPPPASSPR_	_VS[+80]PTASPPPASSPR_	FALSE					593076	564578					0.000271222	4.10304e-12					37.2853	37.2106					0.874385	0.895679					12.7409	9.35729
B9DFW5	AT3G26910	AT3G26910 protein;Hydroxyproline-rich glycoprotein family protein;Hydroxyproline-rich glycoprotein family protein	5.41017e-15	0.891306	68220.6	VSPTASPPPASSPR	TRUE	_VSPTASPPPASS[Phospho]PR_.2	_VSPTASPPPASS[Phospho]PR_	_VSPTASPPPASS[+80]PR_	FALSE				180191	196035					0.005069	0.00105389					35.6579	35.7674					0.919725	0.846892					7.08419	7.72555
B9DGQ5	AT1G09060	AT1G09060 protein;JmjC domain protein JMJ24	4.29312e-37	0.94041	105591	TPPSVAVMDPTR	TRUE	_T[Phospho]PPSVAVM[Oxidation]DPTR_.2	_T[Phospho]PPSVAVM[Oxidation]DPTR_	_T[+80]PPSVAVM[+16]DPTR_	FALSE				80503.8	2940.51					0.00719437	0.00668688					48.8445	47.7596					0.994263	0.923215					14.8627	12.3017
C0Z2R6	AT4G18950	AT4G18950 protein;AT4g18950/F13C5_120	2.78801e-11	0.880791	50113.1	LDDEVLSDDDQVR	TRUE	_LDDEVLS[Phospho]DDDQVR_.2	_LDDEVLS[Phospho]DDDQVR_	_LDDEVLS[+80]DDDQVR_	FALSE				145346		389500				0.00248763		0.00562264				62.1795		62.3685				1		1
F4HPR9	AT1G53165	Protein kinase superfamily protein	7.3091e-19	0.901265	76518.5	SSSASEDSISNLAEAK	TRUE	_SSS[Phospho]ASEDSISNLAEAK_.2	_SSS[Phospho]ASEDSISNLAEAK_	_SSS[+80]ASEDSISNLAEAK_	FALSE				1.05763e+06	833173	718420				0.000107842	1.94074e-09	7.57917e-07				63.8499	64.0764	64.2721				0.862848	0.947417	0.86414				9.42866	10.3877	10.0667
F4HQA1	AT1G79730	Protein PAF1 homolog	0.000115742	0.84269	67337.9	DDDAVTPIK	TRUE	_DDDAVT[Phospho]PIK_.2	_DDDAVT[Phospho]PIK_	_DDDAVT[+80]PIK_	FALSE				67785.5	47314.6					0.00189168	0.00651805					38.6667	38.5768					1	1
F4HSC9	AT1G01540	Protein kinase superfamily protein;Probable serine/threonine-protein kinase At1g01540	4.10514e-10	0.876945	42775.1	LLGSESSYVTTR	TRUE	_LLGSESSYVTT[Phospho]R_.2	_LLGSESSYVTT[Phospho]R_	_LLGSESSYVTT[+80]R_	FALSE				2.10921e+06	1.91541e+06	1.64982e+06				8.40218e-12	2.48456e-10	6.64166e-11				59.2342	59.5949	59.6507				0.945169	0.966696	0.888248				24.2748	23.1504	20.0054
F4HW65	AT1G14460	Protein STICHEL-like 1	4.47153e-33	0.933036	124891	ATEESISR	TRUE	_AT[Phospho]EES[Phospho]ISR_.2	_AT[Phospho]EES[Phospho]ISR_	_AT[+80]EES[+80]ISR_	FALSE				41217.8	26777					0.000455002	0.00224675					24.8862	24.7702					0.786587	0.917573					1.98796	4.98781
F4HYR4	AT1G62330	O-fucosyltransferase 15	1.1338e-06	0.862083	73296.1	VQDLIHGGGGASPVQSPTR	TRUE	_VQDLIHGGGGASPVQS[Phospho]PTR_.3	_VQDLIHGGGGASPVQS[Phospho]PTR_	_VQDLIHGGGGASPVQS[+80]PTR_	FALSE				693188	565685					0.000511674	1.42583e-05					56.6483	57.2844					0.970317	0.976694					6.29346	6.17586
F4I0A4	AT1G55350	Calpain-type cysteine protease family;Calpain-type cysteine protease DEK1	0.00220247	0.760665	241729	SSSIDAGHTGCTNEANR	TRUE	_SSS[Phospho]IDAGHTGC[Carbamidomethyl]TNEANR_.2	_SSS[Phospho]IDAGHTGC[Carbamidomethyl]TNEANR_	_SSS[+80]IDAGHTGC[+57]TNEANR_	FALSE					32937.1	69797.4					0.00263874	0.00104658					32.8865	32.8444					0.937529	0.849913					14.9174	17.6599
F4I1W0	AT1G55690	Sec14p-like phosphatidylinositol transfer family protein;Phosphatidylinositol/phosphatidylcholine transfer protein SFH13	0.02158	0.679822	71401.8	SDFEISEDER	TRUE	_S[Phospho]DFEIS[Phospho]EDER_.2	_S[Phospho]DFEIS[Phospho]EDER_	_S[+80]DFEIS[+80]EDER_	FALSE				31351.3	7802.17					0.00727734	0.00346404					60.0945	60.0565					1	1
F4I397	AT1G36940	Myotubularin-like protein;At1g36940	1.14579e-05	0.855231	24608.3	QNSVQFQR	TRUE	_QNS[Phospho]VQFQR_.2	_QNS[Phospho]VQFQR_	_QNS[+80]VQFQR_	FALSE				21947.7	18634.2					0.00576267	0.00240576					42.1734	38.3579					1	1
F4I420	AT1G76810	Eukaryotic translation initiation factor 5B	3.67907e-15	0.891748	142116	GIDTSVQGEDEVEPK	TRUE	_GIDTS[Phospho]VQGEDEVEPK_.2	_GIDTS[Phospho]VQGEDEVEPK_	_GIDTS[+80]VQGEDEVEPK_	FALSE					2.19284e+06	2.38651e+06					0.000346099	0.00019703					54.0478	54.1772					0.995656	0.961421					6.43468	4.2157
F4I5P9	AT1G04550	Auxin-responsive protein;Auxin-responsive protein IAA12	0.00835199	0.719594	18737.4	SAESSSHQGASPPR	TRUE	_SAESSSHQGAS[Phospho]PPR_.3	_SAESSSHQGAS[Phospho]PPR_	_SAESSSHQGAS[+80]PPR_	FALSE				33492.3	11497.6					0.00810488	0.00965085					28.8492	28.511					0.913514	0.956182					8.24337	8.73625
F4IAE9	AT1G05910	ATPase family AAA domain-containing protein At1g05910	0.000804925	0.785276	133784	TESGADQDTSEEK	TRUE	_TESGADQDT[Phospho]S[Phospho]EEK_.2	_TESGADQDT[Phospho]S[Phospho]EEK_	_TESGADQDT[+80]S[+80]EEK_	FALSE				64865.2	75077					0.00188635	0.00681163					16.0149	15.8072					0.999428	0.999556					15.6072	15.2365
F4IDB2	AT1G72390	Protein PHYTOCHROME-DEPENDENT LATE-FLOWERING	3.06056e-19	0.902219	143310	SPSVGPQTLGDHAILDR	TRUE	_S[Phospho]PSVGPQTLGDHAILDR_.3	_S[Phospho]PSVGPQTLGDHAILDR_	_S[+80]PSVGPQTLGDHAILDR_	FALSE				1.03755e+06	1.2486e+06	952586				0.000107849	1.13543e-06	1.45575e-16				75.1573	76.174	76.798				0.893729	0.887106	0.788758				4.892	6.33141	3.0106
F4IDB3	AT1G72410	COP1-interacting protein-like protein	1.14742e-26	0.919963	128010	SFFSLSTFR	TRUE	_SFFSLST[Phospho]FR_.2	_SFFSLST[Phospho]FR_	_SFFSLST[+80]FR_	FALSE				108223	86421.8					0.000228962	0.000341116					103.234	104.159					0.855637	0.87873					7.09744	8.9079
F4IHI1	AT2G21470	SUMO-activating enzyme subunit;SUMO-activating enzyme subunit 2	2.98746e-05	0.851368	70054.7	SEDEDIEQYGR	TRUE	_S[Phospho]EDEDIEQYGR_.2	_S[Phospho]EDEDIEQYGR_	_S[+80]EDEDIEQYGR_	FALSE				349791	4212.83					0.00760575	0.00371143					50.8582	55.3004					0.993565	0.989862					6.03963	6.09855
F4II62	AT2G46270	G-box binding factor 3;G-box-binding factor 3	0.000281487	0.819791	38596.9	GNSSEEPKPPTK	TRUE	_GNS[Phospho]SEEPKPPTK_.2	_GNS[Phospho]SEEPKPPTK_	_GNS[+80]SEEPKPPTK_	FALSE				399796	376724					0.000123519	2.0798e-07					33.0358	32.4184					0.841318	0.992384					8.10292	8.52539
F4ITF9	AT2G19710	Regulator of Vps4 activity in the MVB pathway protein	4.89186e-32	0.931012	104927	MPVSASSEDEEEVER	TRUE	_MPVSASS[Phospho]EDEEEVER_.2	_MPVSASS[Phospho]EDEEEVER_	_MPVSASS[+80]EDEEEVER_	FALSE					500174	420206					3.0565e-06	0.000207413					52.3645	52.3557					0.952621	0.902135					6.85187	4.00316
F4IWB6	AT3G20920	Translocation protein SEC62	0.00107049	0.77865	41815.8	SSGSASTSVR	TRUE	_SS[Phospho]GSASTSVR_.2	_SS[Phospho]GSASTSVR_	_SS[+80]GSASTSVR_	FALSE				176943	254520					0.000297783	0.000666595					17.5042	17.4917					0.860086	0.909662					16.9248	16.0028
F4IWV2	AT3G55410	2-oxoglutarate dehydrogenase, E1 component	8.72479e-16	0.893368	115163	AQSAPVPR	TRUE	_AQS[Phospho]APVPR_.2	_AQS[Phospho]APVPR_	_AQS[+80]APVPR_	FALSE					109926	13831.3					0.00711941	0.00754857					27.9976	27.3461					1	1
F4IXZ6	AT3G49590	Autophagy-related protein 13;Autophagy-related protein 13a	1.0596e-27	0.922191	68458.5	FSGVLSSSDSPR	TRUE	_FSGVLSSS[Phospho]DS[Phospho]PR_.2	_FSGVLSSS[Phospho]DS[Phospho]PR_	_FSGVLSSS[+80]DS[+80]PR_	FALSE					615092	521677					0.0012389	0.0002857					61.8855	61.9256					0.843037	0.764595					16.0989	13.7148
F4IYD5	AT3G01060	Lysine-tRNA ligase	2.49836e-15	0.89219	50209.6	TVLTDDVDGDQSKR	TRUE	_T[Phospho]VLTDDVDGDQSKR_.2	_T[Phospho]VLTDDVDGDQSKR_	_T[+80]VLTDDVDGDQSKR_	FALSE				165786	118064					0.000236946	0.000978621					46.8945	47.2838					0.991152	0.990073					7.63368	8.1159
F4IZ87	AT3G49900	Phototropic-responsive NPH3 family protein;BTB/POZ domain-containing protein At3g49900	0.00320627	0.751902	58331.1	GSVSNLSTTYR	TRUE	_GSVS[Phospho]NLSTTYR_.2	_GSVS[Phospho]NLSTTYR_	_GSVS[+80]NLSTTYR_	FALSE				82152.9		45758.7				0.000246337		0.00367154				54.6245		54.7908				0.93543		0.770388				6.06031		5.88635
F4IZK5	AT3G62900	CW-type Zinc Finger	1.25056e-12	0.884838	154091	SGLASSGNPK	TRUE	_S[Phospho]GLASSGNPK_.2	_S[Phospho]GLASSGNPK_	_S[+80]GLASSGNPK_	FALSE				22688.6	363084					0.00858313	0.00566507					26.1805	26.1389					0.966138	0.976298					5.04416	5.41136
F4J6F6	AT3G17850	Probable serine/threonine protein kinase IREH1	3.51437e-15	0.891803	143792	SFSHELNSK	TRUE	_SFS[Phospho]HELNSK_.2	_SFS[Phospho]HELNSK_	_SFS[+80]HELNSK_	FALSE				120468		94823.3				0.00752601		0.00186586				49.3302		49.7248				0.910848		0.947037				5.04087		5.794
F4J8L2	AT3G12020	P-loop containing nucleoside triphosphate hydrolases superfamily protein;Kinesin-like protein KIN-7K, chloroplastic	4.61411e-09	0.873135	117868	SQGADSEISDSISETR	TRUE	_SQGADS[Phospho]EIS[Phospho]DSIS[Phospho]ETR_.2	_SQGADS[Phospho]EIS[Phospho]DSIS[Phospho]ETR_	_SQGADS[+80]EIS[+80]DSIS[+80]ETR_	FALSE				1.72816e+06	1.88752e+06	1.60144e+06				4.77833e-05	0.00016957	0.000346204				58.2281	58.0188	58.3357				0.83415	0.870472	0.832967				34.6922	32.8805	36.9033
F4JC80	AT3G13225	WW domain-containing protein	5.47138e-13	0.885861	97569.1	SNDSTEVGSSATASK	TRUE	_S[Phospho]NDSTEVGSSATASK_.2	_S[Phospho]NDSTEVGSSATASK_	_S[+80]NDSTEVGSSATASK_	FALSE				35823.4	20369.4					0.000223837	0.000357982					29.1506	28.9821					0.916282	0.903766					12.411	16.7569
F4JC80	AT3G13225	WW domain-containing protein	5.47138e-13	0.885861	97569.1	SAVMDEPETNKSPPK	TRUE	_SAVMDEPETNKS[Phospho]PPK_.2	_SAVMDEPETNKS[Phospho]PPK_	_SAVMDEPETNKS[+80]PPK_	FALSE				90605.7	109150	104169				0.00657577	0.000544627	0.00450821				42.8155	42.7414	42.4938				0.82676	0.862856	0.929419				8.17185	13.171	8.1383
F4JDV4	AT3G48195	Phox (PX) domain-containing protein	7.5693e-06	0.856657	103589	LSSLDMSR	TRUE	_LSS[Phospho]LDM[Oxidation]SR_.2	_LSS[Phospho]LDM[Oxidation]SR_	_LSS[+80]LDM[+16]SR_	FALSE				20692.6	34158.1					0.000314745	0.00109664					36.4526	36.2702					0.979389	0.939991					19.8017	16.8564
F4JE18	AT3G54760	Dentin sialophosphoprotein-like protein	9.10481e-28	0.922333	82754.5	VSFAERPSFK	TRUE	_VSFAERPS[Phospho]FK_.2	_VSFAERPS[Phospho]FK_	_VSFAERPS[+80]FK_	FALSE					332310	359542					0.000298644	5.00333e-09					66.1585	66.5388					0.998761	0.998197					7.6923	7.31663
F4JEL4	AT3G13920	Eukaryotic translation initiation factor 4A1;Eukaryotic translation initiation factor 4A1;Eukaryotic initiation factor 4A-1	4.36219e-41	0.947468	46949.9	VHACVGGTSVR	TRUE	_VHAC[Carbamidomethyl]VGGT[Phospho]SVR_.2	_VHAC[Carbamidomethyl]VGGT[Phospho]SVR_	_VHAC[+57]VGGT[+80]SVR_	FALSE				218896688		224385392				8.79437e-35		1.28084e-27				42.3633		43.0789				0.790536		0.971182				48.7209		41.0679
F4JFN7	AT3G07810	RNA-binding (RRM/RBD/RNP motifs) family protein;AT3g07810/F17A17_15	4.19189e-21	0.906901	52055.7	SNSSSIQGSPGGPGR	TRUE	_SNS[Phospho]SSIQGSPGGPGR_.2	_SNS[Phospho]SSIQGSPGGPGR_	_SNS[+80]SSIQGSPGGPGR_	FALSE				59880.4	128124					8.73521e-05	6.02622e-15					33.4584	33.1494					0.841447	0.798454					19.5772	19.1662
F4JFU5	AT3G14350	STRUBBELIG-receptor family 7;STRUBBELIG-receptor family 7;Protein STRUBBELIG-RECEPTOR FAMILY 7	9.96749e-24	0.913252	74386.3	SVQNPPLVETK	TRUE	_S[Phospho]VQNPPLVETK_.2	_S[Phospho]VQNPPLVETK_	_S[+80]VQNPPLVETK_	FALSE				99677.6	126632					0.00203227	0.000189458					50.1533	50.0451					0.999318	0.990894					8.28933	5.68963
F4JI10	At4g01330	Protein kinase superfamily protein	6.14168e-40	0.945376	53663.3	TEISPAVAETSESDSSK	TRUE	_TEIS[Phospho]PAVAETSESDSSK_.2	_TEIS[Phospho]PAVAETSESDSSK_	_TEIS[+80]PAVAETSESDSSK_	FALSE				1.06513e+06	512179					0.00671037	0.000150994					49.8447	49.7884					0.931378	0.983572					7.97835	10.7502
F4JI10	At4g01330	Protein kinase superfamily protein	6.14168e-40	0.945376	53663.3	VVFSDRVSSGESR	TRUE	_VVFSDRVS[Phospho]S[Phospho]GESR_.2	_VVFSDRVS[Phospho]S[Phospho]GESR_	_VVFSDRVS[+80]S[+80]GESR_	FALSE				590360	545705					0.00167201	0.00761089					52.3714	52.7463					0.835862	0.927804					6.75033	8.68901
F4JNF8	At4g17240	Structural maintece of chromosomes protein	0.000722728	0.787612	38402.7	TLSMVLR	TRUE	_TLS[Phospho]MVLR_.2	_TLS[Phospho]MVLR_	_TLS[+80]MVLR_	FALSE				8903.67	4627.35	4950.92				0.00121592	0.00311761	0.00355294				78.8459	79.4345	79.5019				0.837871	0.778549	0.774977				2.78972	2.25723	2.23663
F4JNF8	At4g17240	Structural maintece of chromosomes protein	0.000722728	0.787612	38402.7	VDSAEESLSGR	TRUE	_VDS[Phospho]AEESLSGR_.2	_VDS[Phospho]AEESLSGR_	_VDS[+80]AEESLSGR_	FALSE				112398	127990	156347				0.0037226	0.00191163	0.00120855				42.0713	42.1361	42.0329				0.936043	0.983465	0.998865				4.3766	5.77873	8.4734
F4JNM2	AT4G29440	Regulator of Vps4 activity in the MVB pathway protein	8.4e-25	0.915724	119290	SHMSEGPDDLGR	TRUE	_S[Phospho]HMS[Phospho]EGPDDLGR_.2	_S[Phospho]HMS[Phospho]EGPDDLGR_	_S[+80]HMS[+80]EGPDDLGR_	FALSE				35432.8	23771.2					0.000107834	0.000979616					46.4854	46.7978					1	1
F4JQY4	AT4G24520	NADPH--cytochrome P450 reductase;NADPH--cytochrome P450 reductase 1	5.54613e-19	0.901567	76325.3	SMESNVANGNTTIDIHHPCR	TRUE	_S[Phospho]M[Oxidation]ESNVANGNTTIDIHHPC[Carbamidomethyl]R_.3	_S[Phospho]M[Oxidation]ESNVANGNTTIDIHHPC[Carbamidomethyl]R_	_S[+80]M[+16]ESNVANGNTTIDIHHPC[+57]R_	FALSE				657127		771864				1.89731e-09		1.66763e-08				61.6561		64.9198				0.861735		0.985173				15.6336		15.9355
F4JRF7	AT4G12770	Chaperone DnaJ-domain superfamily protein;Auxilin-related protein 2	8.16258e-26	0.918058	98158.8	YGSSGDSR	TRUE	_YGS[Phospho]SGDSR_.2	_YGS[Phospho]SGDSR_	_YGS[+80]SGDSR_	FALSE				80309.5	102807	100587				0.00564298	0.000167514	0.00020642				16.6879	16.5896	16.7751				0.966738	0.909445	0.843032				7.91038	11.4145	8.32819
F4JSK5	AT4G25340	Peptidylprolyl isomerase;Peptidyl-prolyl cis-trans isomerase FKBP53	0.000285348	0.817832	48978.9	SSEVENASGEK	TRUE	_SSEVENAS[Phospho]GEK_.2	_SSEVENAS[Phospho]GEK_	_SSEVENAS[+80]GEK_	FALSE				85480.4	94747	57853.9				0.000233429	0.00517556	0.00678607				21.5539	21.5139	21.5645				0.998997	0.998923	0.980836				8.59657	8.52573	5.62849
F4JXM9	AT5G65950	Trafficking protein particle complex subunit-like protein	4.41432e-21	0.906841	132228	DPLSVSDSASPIPSR	TRUE	_DPLSVSDSAS[Phospho]PIPSR_.2	_DPLSVSDSAS[Phospho]PIPSR_	_DPLSVSDSAS[+80]PIPSR_	FALSE				735615	907560					5.25755e-15	8.47785e-06					63.5012	63.62					0.803713	0.841624					19.6008	13.4268
F4K148	AT5G19420	Regulator of chromosome condensation (RCC1) family with FYVE zinc finger domain-containing protein	1.23198e-18	0.900683	124676	SDGQLAR	TRUE	_S[Phospho]DGQLAR_.2	_S[Phospho]DGQLAR_	_S[+80]DGQLAR_	FALSE				63477.8	104804					0.00792301	0.000377532					23.2087	23.0146					1	1
F4K3F4	AT5G55300	DNA topoisomerase I;DNA topoisomerase 1 alpha	4.03349e-26	0.91875	104724	ISASPTSVK	TRUE	_ISAS[Phospho]PTSVK_.2	_ISAS[Phospho]PTSVK_	_ISAS[+80]PTSVK_	FALSE				610686		355790				0.00779668		1.44311e-12				36.5424		36.4849				0.968205		0.867916				11.7187		7.18909
F4K3Z6	AT5G13530	RING-type E3 ubiquitin transferase;E3 ubiquitin-protein ligase KEG	1.02378e-18	0.900889	178087	SPSASPDNGIAK	TRUE	_S[Phospho]PSAS[Phospho]PDNGIAK_.2	_S[Phospho]PSAS[Phospho]PDNGIAK_	_S[+80]PSAS[+80]PDNGIAK_	FALSE				171215	193208					0.00126533	8.53267e-05					32.4797	32.1238					0.758917	0.815922					1.76451	3.34387
F4K4Y5	AT5G55660	DEK domain-containing chromatin associated protein	2.34377e-19	0.902518	87206.6	ESVESADNK	TRUE	_ESVES[Phospho]ADNK_.2	_ESVES[Phospho]ADNK_	_ESVES[+80]ADNK_	FALSE				234354		347614				0.000117516		0.000349668				23.8051		23.4288				0.987619		0.882242				5.37917		3.01384
F4K4Y6	AT5G55670	RNA-binding (RRM/RBD/RNP motifs) family protein	1.99964e-32	0.931763	64025.1	TQQAQSVIAQAK	TRUE	_TQQAQS[Phospho]VIAQAK_.2	_TQQAQS[Phospho]VIAQAK_	_TQQAQS[+80]VIAQAK_	FALSE				63376.1	82814.2	51372.8				0.000289027	0.00195912	0.00500327				45.4955	45.6378	45.4424				0.999906	0.97475	0.99707				10.275	4.65336	6.82973
F4K5K6	AT5G20610	Protein PLASTID MOVEMENT IMPAIRED 1-RELATED 1	0.00023117	0.830658	128156	SVEMLEATASEDEEDR	TRUE	_SVEM[Oxidation]LEATAS[Phospho]EDEEDR_.2	_SVEM[Oxidation]LEATAS[Phospho]EDEEDR_	_SVEM[+16]LEATAS[+80]EDEEDR_	FALSE				108617	104123					0.000756478	0.00385369					58.5657	58.7254					0.766277	0.961269					14.4061	11.1979
F4K6F1	AT5G62220	Xyloglucan galactosyltransferase XLT2	1.23717e-11	0.881882	59645.5	NSFNSLHSVGNR	TRUE	_NS[Phospho]FNSLHSVGNR_.3	_NS[Phospho]FNSLHSVGNR_	_NS[+80]FNSLHSVGNR_	FALSE				104247	19554.3					0.00564259	0.00166627					50.7459	52.1945					0.988562	0.925013					7.22734	6.40223
F4K703	AT5G21160	LA RNA-binding protein;LA RNA-binding protein;La-related protein 1A	2.01277e-18	0.900145	92170.2	LSSSPQCTLSGSSPPVGSLPK	TRUE	_LSSSPQC[Carbamidomethyl]TLSGSS[Phospho]PPVGSLPK_.2	_LSSSPQC[Carbamidomethyl]TLSGSS[Phospho]PPVGSLPK_	_LSSSPQC[+57]TLSGSS[+80]PPVGSLPK_	FALSE				7670294	7867990					1.67163e-10	4.90357e-07					70.706	71.119					0.752353	0.853164					20.9682	23.7651
F4K7K7	AT5G56240	Hapless protein	0.000708773	0.788022	109147	AASSSNTMNLTNSPTR	TRUE	_AASSSNTM[Oxidation]NLTNS[Phospho]PTR_.2	_AASSSNTM[Oxidation]NLTNS[Phospho]PTR_	_AASSSNTM[+16]NLTNS[+80]PTR_	FALSE					78459.8	87957					0.000356418	0.000237443					33.4964	33.4069					0.833888	0.771565					19.9618	20.4638
F4K7T6	AT5G62790	1-deoxy-D-xylulose-5-phosphate reductoisomerase;1-deoxy-D-xylulose 5-phosphate reductoisomerase, chloroplastic	0.02158	0.679814	54228.4	NESLINELK	TRUE	_NES[Phospho]LINELK_.2	_NES[Phospho]LINELK_	_NES[+80]LINELK_	FALSE					419200	573306					0.00957686	0.00406844					70.8836	71.7246					1	1
F4K8S9	AT5G44180	Homeodomain-like transcriptional regulator;Homeobox-DDT domain protein RLT2	1.32987e-15	0.892896	169583	PGHVYSPNLVEYDSPYQK	TRUE	_PGHVYS[Phospho]PNLVEYDSPYQK_.3	_PGHVYS[Phospho]PNLVEYDSPYQK_	_PGHVYS[+80]PNLVEYDSPYQK_	FALSE					1.24805e+06	990656					4.55591e-08	0.000283531					80.2222	80.9076					0.972967	0.985591					16.6061	12.4971
F4K9U4	AT5G22320	Leucine-rich repeat (LRR) family protein;AT5g22320/MWD9_11	0.00129415	0.773807	48863.5	LDTDDETFDAYHNK	TRUE	_LDT[Phospho]DDETFDAYHNK_.2	_LDT[Phospho]DDETFDAYHNK_	_LDT[+80]DDETFDAYHNK_	FALSE				98821.5	113184					0.00664697	0.00116068					56.9755	58.2254					0.999301	0.962695					8.95827	5.76813
O04425	AT4G16280	Flowering time control protein FCA	1.57231e-10	0.878357	81706.1	QSPQELMWK	TRUE	_QS[Phospho]PQELMWK_.2	_QS[Phospho]PQELMWK_	_QS[+80]PQELMWK_	FALSE					134197	105095					0.00354304	0.00171794					73.1565	73.286					1	1
O22203	AT2G40890	Cytochrome P450 98A3	0.000282426	0.819204	57926.9	STEAFSR	TRUE	_S[Phospho]TEAFSR_.2	_S[Phospho]TEAFSR_	_S[+80]TEAFSR_	FALSE					13268.8	31301.5					4.28097e-05	0.000370583					40.8721	40.6909					0.857781	0.829925					8.74087	9.06005
O22558	AT2G17700	Serine/threonine-protein kinase STY8	5.35851e-22	0.909117	61509.2	AVVASPSQENPR	TRUE	_AVVASPS[Phospho]QENPR_.2	_AVVASPS[Phospho]QENPR_	_AVVASPS[+80]QENPR_	FALSE				105534		102592				0.00143351		0.00211469				38.1063		38.1412				0.869084		0.795729				2.89289		2.35981
O22824	AT2G43800	Formin-like protein 2	2.32454e-23	0.912372	98320.2	RQDFDGDDNENDEFFSPR	TRUE	_RQDFDGDDNENDEFFS[Phospho]PR_.3	_RQDFDGDDNENDEFFS[Phospho]PR_	_RQDFDGDDNENDEFFS[+80]PR_	FALSE					38297.3	55194.6					0.00178739	0.000248459					83.0989	84.6028					1	1
O23066	AT4G00360	Cytochrome P450 86A2	0.00442218	0.742814	62530.1	DQSYSETFLR	TRUE	_DQS[Phospho]YSETFLR_.2	_DQS[Phospho]YSETFLR_	_DQS[+80]YSETFLR_	FALSE					34341.2	9245.46					0.00103007	0.000658105					72.1973	72.3277					0.879824	0.910049					4.08938	5.5548
O23188	AT4G36970	Remorin family protein	3.27877e-08	0.869675	46800.8	AEMTTAMQSPVVSR	TRUE	_AEM[Oxidation]TT[Phospho]AM[Oxidation]QS[Phospho]PVVSR_.2	_AEM[Oxidation]TT[Phospho]AM[Oxidation]QS[Phospho]PVVSR_	_AEM[+16]TT[+80]AM[+16]QS[+80]PVVSR_	FALSE				21115.1	59482.7					0.00853807	0.000375507					32.1559	31.6773					0.998086	0.956341					29.9978	26.5967
O48847	AT2G32700	Transcriptional corepressor LEUNIG_HOMOLOG	1.93351e-13	0.887124	85514.7	DGQQNANDGSIGSPMQSSSSK	TRUE	_DGQQNANDGSIGS[Phospho]PM[Oxidation]QSSSSK_.3	_DGQQNANDGSIGS[Phospho]PM[Oxidation]QSSSSK_	_DGQQNANDGSIGS[+80]PM[+16]QSSSSK_	FALSE				154633	183525					3.86838e-06	8.29886e-05					31.1954	30.7178					0.954249	0.999981					15.4769	26.9398
O48946	AT4G32410	Cellulose synthase A catalytic subunit 1 [UDP-forming]	9.45854e-33	0.932404	122237	TPDTQSVR	TRUE	_T[Phospho]PDTQSVR_.2	_T[Phospho]PDTQSVR_	_T[+80]PDTQSVR_	FALSE					1.62793e+06	554607					0.00636066	0.000351402					24.4429	24.1041					0.816883	0.946491					3.18852	4.56606
O48963	AT3G45780	Phototropin-1	1.16848e-29	0.926273	111689	ALSESTNLHPFMTK	TRUE	_ALS[Phospho]ESTNLHPFMTK_.2	_ALS[Phospho]ESTNLHPFMTK_	_ALS[+80]ESTNLHPFMTK_	FALSE				301358	167558					0.00663355	0.00526175					74.2966	75.3747					0.922659	0.754865					11.467	7.851
O48963	AT3G45780	Phototropin-1	1.16848e-29	0.926273	111689	RMSENVVPSGR	TRUE	_RM[Oxidation]S[Phospho]ENVVPSGR_.3	_RM[Oxidation]S[Phospho]ENVVPSGR_	_RM[+16]S[+80]ENVVPSGR_	FALSE				118899	115779	46813.8				0.000198695	0.00309585	0.00930016				39.3637	39.1971	41.0594				0.962293	0.798086	0.967512				12.6575	11.0392	12.0113
O48963	AT3G45780	Phototropin-1	1.16848e-29	0.926273	111689	FLQGSGTDADELAK	TRUE	_FLQGS[Phospho]GTDADELAK_.2	_FLQGS[Phospho]GTDADELAK_	_FLQGS[+80]GTDADELAK_	FALSE					422690	313396					0.00203055	0.00171425					62.9695	63.1489					0.798202	0.915853					2.37509	3.38729
O49160	AT3G56150	Eukaryotic translation initiation factor 3 subunit C	6.19971e-20	0.903965	102949	YLQSGSEDDDDTDTKR	TRUE	_YLQS[Phospho]GS[Phospho]EDDDDT[Phospho]DTKR_.2	_YLQS[Phospho]GS[Phospho]EDDDDT[Phospho]DTKR_	_YLQS[+80]GS[+80]EDDDDT[+80]DTKR_	FALSE				428132	471242					9.51729e-05	2.37216e-05					35.0022	35.0501					0.937419	0.952791					24.143	23.2913
O49160	AT3G56150	Eukaryotic translation initiation factor 3 subunit C	6.19971e-20	0.903965	102949	TGGGGLDLSSR	TRUE	_TGGGGLDLS[Phospho]SR_.2	_TGGGGLDLS[Phospho]SR_	_TGGGGLDLS[+80]SR_	FALSE					45106.7	47524					0.000810587	0.00118277					49.2416	49.1397					0.908104	0.865029					8.03031	8.26509
O49613	AT4G35060	Heavy metal-associated isoprenylated plant protein 25	0.000235161	0.830036	17162.4	SLQTVDVR	TRUE	_S[Phospho]LQTVDVR_.2	_S[Phospho]LQTVDVR_	_S[+80]LQTVDVR_	FALSE				3.37423e+06		1.22481e+06				0.00734101		0.0072234				41.872		41.7877				0.973363		0.868351				4.59844		2.88646
O80567	AT2G43970	La-related protein 6B	1.26632e-05	0.854868	60589	TTPPLPQPPR	TRUE	_TT[Phospho]PPLPQPPR_.2	_TT[Phospho]PPLPQPPR_	_TT[+80]PPLPQPPR_	FALSE					2.59639e+06	2808648					0.000929891	0.000101431					56.9634	56.9259					0.963136	0.987023					11.2243	9.55848
O80986	AT2G26110	At2g26110	6.49796e-17	0.896271	35371.7	SPSMIHR	TRUE	_SPS[Phospho]MIHR_.2	_SPS[Phospho]MIHR_	_SPS[+80]MIHR_	FALSE				1.91172e+06	1.88205e+06					2.54821e-18	1.34245e-06					37.7367	37.5392					0.999999	0.970525					15.847	9.75809
O81015	AT2G26920	At2g26920	0.0001796	0.836874	71057.9	SPSTTESVNK	TRUE	_S[Phospho]PSTTESVNK_.2	_S[Phospho]PSTTESVNK_	_S[+80]PSTTESVNK_	FALSE					410867	411255					0.00409548	0.00477643					22.9056	22.8928					0.980362	0.982593					6.76569	6.97254
O81424	AT4G02210	Myb/SANT-like DNA-binding domain protein	0.000284301	0.818333	51489.2	AEESISEGESK	TRUE	_AEES[Phospho]IS[Phospho]EGESK_.2	_AEES[Phospho]IS[Phospho]EGESK_	_AEES[+80]IS[+80]EGESK_	FALSE				28759.1	30846.8	39464				9.15159e-10	4.92246e-05	7.084e-06				30.1551	30.0173	30.1752				0.980397	0.988903	0.981773				4.89207	5.4786	4.96773
P10795	AT1G67090	Ribulose bisphosphate carboxylase small chain 1A, chloroplastic	6.68323e-26	0.918262	20216.1	KFETLSYLPDLTDSELAK	TRUE	_KFETLSYLPDLTDS[Phospho]ELAK_.3	_KFETLSYLPDLTDS[Phospho]ELAK_	_KFETLSYLPDLTDS[+80]ELAK_	FALSE				1.20028e+06		1.82305e+06				0.00296022		0.000426422				110.158		111.976				0.848786		0.860984				6.72965		14.7809
P31167	AT3G08580	ADP,ATP carrier protein 1, mitochondrial	9.35802e-24	0.913315	41475.6	DEGFGSLWR	TRUE	_DEGFGS[Phospho]LWR_.2	_DEGFGS[Phospho]LWR_	_DEGFGS[+80]LWR_	FALSE				3337.96		8359.16				0.00721215		0.00465429				93.37		84.3867				1		1
P43333	AT1G09760	U2 small nuclear ribonucleoprotein A'	8.72158e-15	0.890762	28041.4	VSETAENPETPK	TRUE	_VSETAENPET[Phospho]PK_.2	_VSETAENPET[Phospho]PK_	_VSETAENPET[+80]PK_	FALSE				123778	365994	598546				5.63841e-07	7.3302e-07	0.00290925				32.7307	32.1748	32.4872				0.999999	0.999981	0.997514				15.2296	12.5835	7.68756
P54609	AT3G09840	Cell division control protein 48 homolog A	1.97253e-12	0.884267	89393.4	LAGESESNLR	TRUE	_LAGES[Phospho]ESNLR_.2	_LAGES[Phospho]ESNLR_	_LAGES[+80]ESNLR_	FALSE				89546.5	7981.68					0.00909792	0.00939166					41.4363	43.6528					0.884622	0.894995					3.03694	3.14281
P83483	AT5G08670	ATP synthase subunit beta-1, mitochondrial;ATP synthase subunit beta-2, mitochondrial	5.81838e-27	0.920591	59670.9	LPSPSPAR	TRUE	_LPS[Phospho]PSPAR_.2	_LPS[Phospho]PSPAR_	_LPS[+80]PSPAR_	FALSE				139024	88739.2	123915				0.00259926	0.000712674	0.00267497				35.8782	35.88	35.9283				0.952346	0.973599	0.98282				3.99497	4.60761	5.04665
P93017	AT2G33830	Dormancy-associated protein homolog 1	1.82345e-21	0.907801	11656	TVAAVAGSPGTPTTPGSAR	TRUE	_TVAAVAGSPGT[Phospho]PTTPGSAR_.2	_TVAAVAGSPGT[Phospho]PTTPGSAR_	_TVAAVAGSPGT[+80]PTTPGSAR_	FALSE				21645150	22311364	23479992				2.65381e-23	1.3301e-17	9.80847e-20				47.5856	47.7596	47.8109				0.830289	0.972314	0.992463				61.2836	56.1324	62.2356
P93758	AT2G41870	Remorin 4.2	2.91973e-32	0.931444	30944.5	GYFSPPR	TRUE	_GYFS[Phospho]PPR_.2	_GYFS[Phospho]PPR_	_GYFS[+80]PPR_	FALSE					1.76075e+06	1.70332e+06					1.64037e-05	5.90744e-06					63.8013	64.0585					0.96379	0.814749					4.28154	2.48117
P94088	AT5G51410	Arginine-aspartate-rich RNA binding protein-like	0.00365102	0.748495	38721.4	LKESFENSPR	TRUE	_LKESFENS[Phospho]PR_.2	_LKESFENS[Phospho]PR_	_LKESFENS[+80]PR_	FALSE				472204	233421	423487				0.008041	0.000589487	0.00378875				48.4405	49.1821	49.4182				0.957511	0.771732	0.991819				5.32144	6.19288	5.79772
Q0WNW4	AT5G16720	Myosin-binding protein 3	6.58736e-06	0.857114	77021.3	NFGSDSEKLEIIK	TRUE	_NFGS[Phospho]DSEKLEIIK_.2	_NFGS[Phospho]DSEKLEIIK_	_NFGS[+80]DSEKLEIIK_	FALSE				290186		866585				0.0013106		0.00427364				79.8124		82.3336				0.95234		0.845816				3.99482		2.70216
Q0WR59	AT5G10020	Probable inactive receptor kinase At5g10020	1.78114e-21	0.907826	114714	SSSGGSPLSSSPR	TRUE	_SSSGGS[Phospho]PLSSS[Phospho]PR_.2	_SSSGGS[Phospho]PLSSS[Phospho]PR_	_SSSGGS[+80]PLSSS[+80]PR_	FALSE				580496		620444				0.000107839		3.53436e-11				30.2808		30.2239				0.97614		0.962686				42.7217		43.2361
Q0WUK0	AT3G13990	Dentin sialophosphoprotein, putative (DUF1296);AT3g13990/MDC16_11	4.96527e-25	0.916251	92168.7	NGPPNAHRPSSPTSK	TRUE	_NGPPNAHRPSS[Phospho]PTSK_.3	_NGPPNAHRPSS[Phospho]PTSK_	_NGPPNAHRPSS[+80]PTSK_	FALSE					1.20805e+06	6672650					7.12819e-05	2.92095e-08					30.8114	33.7699					0.982414	0.818674					11.7638	6.99412
Q0WUY5	AT3G07660	Flocculation protein (DUF1296)	5.13982e-18	0.899081	90075.8	SVEDATPSAEATSR	TRUE	_SVEDAT[Phospho]PSAEATSR_.2	_SVEDAT[Phospho]PSAEATSR_	_SVEDAT[+80]PSAEATSR_	FALSE				353182	270494	244220				0.000216808	3.71435e-09	1.86501e-09				36.5816	36.5374	36.5241				0.983872	0.997513	0.872907				14.7006	18.3185	11.5711
Q0WVF5	AT2G16440	DNA replication licensing factor MCM4	4.15621e-14	0.88895	93656.2	SSTPTQFATPPPPPSR	TRUE	_SST[Phospho]PT[Phospho]QFATPPPPPSR_.2	_SST[Phospho]PT[Phospho]QFATPPPPPSR_	_SST[+80]PT[+80]QFATPPPPPSR_	FALSE					128368	94530.8					0.00145028	0.00183869					61.2824	61.5189					0.761744	0.756512					15.4051	12.5004
Q2V3X5	AT3G08780	AT3G08780 protein;AT3g08780/F17O14_25	0.000135294	0.841005	34281.6	IESLASDVEK	TRUE	_IESLAS[Phospho]DVEK_.2	_IESLAS[Phospho]DVEK_	_IESLAS[+80]DVEK_	FALSE				78530.5	95710.2					0.00171466	0.000662527					61.4258	61.5736					0.829135	0.75179					2.57951	2.10818
Q38796	AT4G02560	Homeobox protein LUMINIDEPENDENS	0.00683106	0.727221	105415	DSPPIQNNEAK	TRUE	_DS[Phospho]PPIQNNEAK_.2	_DS[Phospho]PPIQNNEAK_	_DS[+80]PPIQNNEAK_	FALSE				55237.6		111580				0.00262032		0.0061717				31.6317		31.3425				1		1
Q39023	AT3G45640	Mitogen-activated protein kinase 3	4.42605e-08	0.86911	42716.8	PTSENDFMTEYVVTR	TRUE	_PTSENDFM[Oxidation]T[Phospho]EY[Phospho]VVTR_.2	_PTSENDFM[Oxidation]T[Phospho]EY[Phospho]VVTR_	_PTSENDFM[+16]T[+80]EY[+80]VVTR_	FALSE				403380		486709				0.00571184		0.000541736				62.1758		62.0416				0.950596		0.860605				36.8146		26.5062
Q39023	AT3G45640	Mitogen-activated protein kinase 3	4.42605e-08	0.86911	42716.8	PTSENDFMTEYVVTR	TRUE	_PTSENDFMT[Phospho]EYVVTR_.2	_PTSENDFMT[Phospho]EYVVTR_	_PTSENDFMT[+80]EYVVTR_	FALSE				75513.1		73971.8				8.93455e-09		0.00037452				86.088		86.7322				0.991222		0.968676				12.8906		10.7125
Q39026	AT2G43790	Mitogen-activated protein kinase 6	3.2191e-18	0.899611	45057.5	VTSESDFMTEYVVTR	TRUE	_VTSESDFM[Oxidation]T[Phospho]EYVVTR_.2	_VTSESDFM[Oxidation]T[Phospho]EYVVTR_	_VTSESDFM[+16]T[+80]EYVVTR_	FALSE				303084	527224					0.000144	1.50472e-05					68.3739	68.6288					0.9995	0.994288					24.8008	22.7214
Q39247	AT1G17720	Serine/threonine protein phosphatase 2A 55 kDa regulatory subunit B beta isoform	8.63497e-05	0.845193	56274.9	GSESPGTEANGNAYDFTTK	TRUE	_GSES[Phospho]PGTEANGNAYDFTTK_.2	_GSES[Phospho]PGTEANGNAYDFTTK_	_GSES[+80]PGTEANGNAYDFTTK_	FALSE				7336825		7702719				2.82909e-11		3.94208e-10				59.2592		59.4297				0.874905		0.892272				35.9215		32.6908
Q42510	AT1G13980	ARF guanine-nucleotide exchange factor GNOM	3.03621e-38	0.942464	162619	FSQLLSLDTEEPR	TRUE	_FSQLLS[Phospho]LDTEEPR_.2	_FSQLLS[Phospho]LDTEEPR_	_FSQLLS[+80]LDTEEPR_	FALSE				86736.7		49916.6				0.00472683		0.00231748				87.6258		88.4527				0.889378		0.900252				5.34162		5.75606
Q56WH4	AT5G22650	Histone deacetylase HDT2	7.97927e-17	0.896046	32348	PAAAPASTPQK	TRUE	_PAAAPAST[Phospho]PQK_.2	_PAAAPAST[Phospho]PQK_	_PAAAPAST[+80]PQK_	FALSE				188985		255680				0.000107851		0.00196283				22.6665		22.6134				0.999906		0.999565				10.2847		8.74002
Q56Y15	At4g27620	At4g27620	0.00174614	0.766097	36412.6	GCCLHSNASPCER	TRUE	_GC[Carbamidomethyl]C[Carbamidomethyl]LHSNAS[Phospho]PC[Carbamidomethyl]ER_.2	_GC[Carbamidomethyl]C[Carbamidomethyl]LHSNAS[Phospho]PC[Carbamidomethyl]ER_	_GC[+57]C[+57]LHSNAS[+80]PC[+57]ER_	FALSE				7822.56	4690.78	6896.19				0.000477191	0.000330043	0.0011337				35.3748	35.2075	34.925				0.930258	0.964174	0.98381				3.59066	4.29261	5.10701
Q56YP2	AT1G21980	Phosphatidylinositol 4-phosphate 5-kinase 1;Phosphatidylinositol 4-phosphate 5-kinase 2	0.00555764	0.734914	85945.1	MGLSPFVLR	TRUE	_M[Oxidation]GLS[Phospho]PFVLR_.2	_M[Oxidation]GLS[Phospho]PFVLR_	_M[+16]GLS[+80]PFVLR_	FALSE				23515.2	22108.2	47210.6				0.000356642	0.00587112	0.00377484				89.8592	90.2014	90.5171				1	1	1
Q58G10	AT2G24530	Transcriptional regulator of RNA polII, SAGA, subunit	0.00182861	0.76497	45756.8	DRPSPLGSNGK	TRUE	_DRPS[Phospho]PLGSNGK_.2	_DRPS[Phospho]PLGSNGK_	_DRPS[+80]PLGSNGK_	FALSE					24769.7	18205.7					0.00665927	0.00072692					34.4986	34.1007					0.905379	0.859879					3.25847	2.81429
Q67YI9	AT2G43160	Clathrin interactor EPSIN 2	3.46495e-23	0.911969	95477.6	FSEQNIGAPPSYEEAVSDSR	TRUE	_FS[Phospho]EQNIGAPPSYEEAVSDSR_.2	_FS[Phospho]EQNIGAPPSYEEAVSDSR_	_FS[+80]EQNIGAPPSYEEAVSDSR_	FALSE					394270	402937					0.00270728	0.000312166					78.0411	78.1234					0.769203	0.933815					6.59953	8.11849
Q680Q4	AT5G60410	E3 SUMO-protein ligase SIZ1	2.71542e-05	0.851816	97033.8	GQVSSDTSNLK	TRUE	_GQVSS[Phospho]DTSNLK_.2	_GQVSS[Phospho]DTSNLK_	_GQVSS[+80]DTSNLK_	FALSE				208562	226251	256109				0.000126632	8.81549e-13	0.000195964				35.1583	35.2678	35.1778				0.969124	0.961525	0.978852				15.6024	13.4727	17.9687
Q682V0	AT3G23100	DNA repair protein XRCC4	0.000148744	0.839821	29854.2	AESFESGRSDDEKSEEEASK	TRUE	_AESFESGRS[Phospho]DDEKS[Phospho]EEEASK_.3	_AESFESGRS[Phospho]DDEKS[Phospho]EEEASK_	_AESFESGRS[+80]DDEKS[+80]EEEASK_	FALSE				476167	430963					0.0008305	0.009825					39.044	38.7544					0.9722	0.98769					31.5476	32.2909
Q6IMT0	AT5G49680	Protein KINKY POLLEN	0.00166915	0.767231	290411	TSSLSGSTDR	TRUE	_TSS[Phospho]LSGSTDR_.2	_TSS[Phospho]LSGSTDR_	_TSS[+80]LSGSTDR_	FALSE				220542	220135	79217.5				0.000151523	0.00149702	0.00116508				25.5536	25.4975	25.1595				0.957874	0.90988	0.82357				10.8105	9.20027	6.28612
Q6R032	AT5G02320	Transcription factor MYB3R-5	0.00122528	0.775224	61731.5	SPEIATPATVSSFPR	TRUE	_S[Phospho]PEIATPATVSSFPR_.2	_S[Phospho]PEIATPATVSSFPR_	_S[+80]PEIATPATVSSFPR_	FALSE				101237	506516					0.000262012	0.000999597					82.3701	77.1473					0.975773	0.999936					7.40407	12.2071
Q6R8G5	AT2G03240	Phosphate transporter PHO1 homolog 5	5.36236e-11	0.879889	95053.4	AFSGLISTSPK	TRUE	_AFS[Phospho]GLISTS[Phospho]PK_.2	_AFS[Phospho]GLISTS[Phospho]PK_	_AFS[+80]GLISTS[+80]PK_	FALSE				403632	439159					3.83768e-12	0.00063576					85.9844	85.8689					0.881387	0.774651					11.2093	12.1974
Q84LG2	AT1G32150	bZIP transcription factor 68	1.7297e-21	0.907859	40867.8	DGETASESGGSAHGPPR	TRUE	_DGETAS[Phospho]ESGGSAHGPPR_.2	_DGETAS[Phospho]ESGGSAHGPPR_	_DGETAS[+80]ESGGSAHGPPR_	FALSE				316470	373044	409419				1.00758e-23	2.89478e-11	0.000199112				30.1526	29.7221	29.3729				0.866867	0.923103	0.814647				10.5628	15.6548	9.21678
Q84WU5	AT5G14720	Protein kinase superfamily protein	1.09891e-28	0.92427	75363.7	SYSGSLYR	TRUE	_S[Phospho]YSGSLYR_.2	_S[Phospho]YSGSLYR_	_S[+80]YSGSLYR_	FALSE					214068	180603					0.00034508	0.000298437					49.727	49.7175					0.993903	0.859183					10.0443	6.82568
Q84WV4	AT4G01810	Protein transport protein SEC23	0.000310494	0.809693	96004.5	TGSPIPR	TRUE	_TGS[Phospho]PIPR_.2	_TGS[Phospho]PIPR_	_TGS[+80]PIPR_	FALSE				466142	530512	644097				0.000223247	3.61709e-05	1.2853e-08				34.1546	34.1862	33.9269				0.884835	0.99259	0.999147				3.03903	5.89744	8.06547
Q84WV4	AT4G01810	Protein transport protein SEC23	0.000310494	0.809693	96004.5	TPVPHSPPVVASPIPPR	TRUE	_TPVPHS[Phospho]PPVVAS[Phospho]PIPPR_.3	_TPVPHS[Phospho]PPVVAS[Phospho]PIPPR_	_TPVPHS[+80]PPVVAS[+80]PIPPR_	FALSE					368041	644838					0.00593653	0.00227188					64.7991	63.488					0.78098	0.919928					6.10941	6.36228
Q8GUM0	AT1G38131	O-fucosyltransferase 11	0.000760181	0.786524	66492.9	ASSFSLR	TRUE	_ASS[Phospho]FSLR_.2	_ASS[Phospho]FSLR_	_ASS[+80]FSLR_	FALSE					393023	534312					0.000752751	0.0001074					52.6848	52.4765					0.953619	0.833533					4.71652	3.71394
Q8GUN2	AT3G56490	Adenylylsulfatase HINT1	7.69551e-21	0.906238	16000.5	EAALAATPSDSPTIFDK	TRUE	_EAALAAT[Phospho]PSDSPTIFDK_.2	_EAALAAT[Phospho]PSDSPTIFDK_	_EAALAAT[+80]PSDSPTIFDK_	FALSE				535814	316384	274402				4.6987e-19	0.00102401	3.32423e-10				77.1407	77.3579	77.61				0.963808	0.906441	0.926059				10.2874	8.91814	8.9775
Q8GUP3	AT4G31880	Transcriptional regulator	9.97922e-26	0.91786	94209.2	TSGDETANVSSPSMAEELPEQSVPK	TRUE	_TSGDETANVSS[Phospho]PSM[Oxidation]AEELPEQSVPK_.3	_TSGDETANVSS[Phospho]PSM[Oxidation]AEELPEQSVPK_	_TSGDETANVSS[+80]PSM[+16]AEELPEQSVPK_	FALSE					8793515	8984689					1.54647e-10	1.54615e-13					65.1435	65.3857					0.942804	0.809241					54.1188	50.7542
Q8GXZ3	AT5G01020	Probable serine/threonine-protein kinase PBL8	1.86017e-20	0.905285	45618.2	DEAAVFTPQAQAQQLQK	TRUE	_DEAAVFT[Phospho]PQAQAQQLQK_.2	_DEAAVFT[Phospho]PQAQAQQLQK_	_DEAAVFT[+80]PQAQAQQLQK_	FALSE				122436	179926					0.000258335	0.000422996					65.7863	65.9513					1	1
Q8GY60	AT4G03415	Probable protein phosphatase 2C 52	3.13101e-13	0.88654	51851.1	SSSDQENETYGNVNTETDAEDEK	TRUE	_SSSDQENETY[Phospho]GNVNTETDAEDEK_.3	_SSSDQENETY[Phospho]GNVNTETDAEDEK_	_SSSDQENETY[+80]GNVNTETDAEDEK_	FALSE				157538	170278	217522				0.00599549	0.000464702	0.00482703				49.9037	49.7092	49.8687				0.826041	0.877072	0.795435				11.5127	15.1264	10.6867
Q8L4D8	AT1G74690	Protein IQ-DOMAIN 31	2.99497e-21	0.907269	65199.6	STDSQNVAPVQDHSLSDAER	TRUE	_STDS[Phospho]QNVAPVQDHSLSDAER_.3	_STDS[Phospho]QNVAPVQDHSLSDAER_	_STDS[+80]QNVAPVQDHSLSDAER_	FALSE				1.60593e+06		655907				4.08875e-23		3.68838e-11				52.7184		53.3301				0.826601		0.793743				23.1409		16.5715
Q8L4D8	AT1G74690	Protein IQ-DOMAIN 31	2.99497e-21	0.907269	65199.6	STDSQNVAPVQDHSLSDAER	TRUE	_STDSQNVAPVQDHS[Phospho]LSDAER_.3	_STDSQNVAPVQDHS[Phospho]LSDAER_	_STDSQNVAPVQDHS[+80]LSDAER_	FALSE				1.62649e+06	1.75162e+06	1.8475e+06				5.71174e-07	1.21063e-06	0.000303258				53.1941	53.6151	53.8824				0.777594	0.911742	0.862698				14.0361	22.9314	14.8018
Q8L603	AT4G20300	Serine/Threonine-kinase, putative (DUF1639)	6.82258e-11	0.879551	39664.2	SPPSPDQIEK	TRUE	_SPPS[Phospho]PDQIEK_.2	_SPPS[Phospho]PDQIEK_	_SPPS[+80]PDQIEK_	FALSE				3.11041e+06	2.90556e+06					1.36491e-16	3.62663e-09					43.5594	43.4544					0.98975	0.816401					5.57017	2.49215
Q8L6X7	AT4G22290	At4g22290	1.85699e-22	0.91023	47536.7	SGQLDHQLSNLASSK	TRUE	_S[Phospho]GQLDHQLS[Phospho]NLASSK_.3	_S[Phospho]GQLDHQLS[Phospho]NLASSK_	_S[+80]GQLDHQLS[+80]NLASSK_	FALSE				120863	133707	123726				0.000418401	0.00705758	0.00368773				70.3803	70.8074	71.0323				0.989304	0.770732	0.924895				15.0267	12.1299	11.2049
Q8L708	AT5G08200	At5g08200	6.79986e-06	0.85701	44846.8	SEADFSSR	TRUE	_S[Phospho]EADFSSR_.2	_S[Phospho]EADFSSR_	_S[+80]EADFSSR_	FALSE					50042.9	24200.4					0.00585515	2.98432e-05					33.8985	33.8703					0.949731	0.98956					4.63193	6.24477
Q8L7M3	AT5G23590	At5g23590	0.000690716	0.788566	33490.2	SAFSPNPSAR	TRUE	_SAFS[Phospho]PNPSAR_.2	_SAFS[Phospho]PNPSAR_	_SAFS[+80]PNPSAR_	FALSE					31348.3	35354.1					0.000352179	0.000306032					45.3557	45.1909					0.843195	0.899718					5.42986	5.44727
Q8L7V7	AT4G02010	AT4g02010/T10M13_2	0.0013174	0.773324	79047.1	NLDAGSFGGSLPHPASTR	TRUE	_NLDAGS[Phospho]FGGSLPHPASTR_.3	_NLDAGS[Phospho]FGGSLPHPASTR_	_NLDAGS[+80]FGGSLPHPASTR_	FALSE					226767	246724					0.00648874	0.00768935					73.7273	73.9658					0.99932	0.832228					10.7827	7.22167
Q8LEL0	AT5G48500	Pathogenic type III effector avirulence factor Avr AvrRpt-cleavage: cleavage site protein	0.000260141	0.825484	18973.6	VSPQLLSVK	TRUE	_VS[Phospho]PQLLSVK_.2	_VS[Phospho]PQLLSVK_	_VS[+80]PQLLSVK_	FALSE				116164	94661	78469.7				0.00123426	3.72748e-08	0.00209636				65.889	66.1311	66.1887				0.949278	0.994637	0.983316				3.92935	6.22278	5.07649
Q8LF20	AT2G25430	Putative clathrin assembly protein At2g25430	3.24699e-15	0.891894	72084	SYGDMTEMGGGGGGGGR	TRUE	_S[Phospho]YGDM[Oxidation]TEM[Oxidation]GGGGGGGGR_.2	_S[Phospho]YGDM[Oxidation]TEM[Oxidation]GGGGGGGGR_	_S[+80]YGDM[+16]TEM[+16]GGGGGGGGR_	FALSE				1.75833e+06	2024427					8.53969e-13	1.03902e-10					29.1886	29.0664					0.812762	0.81864					17.7127	24.3943
Q8LF20	AT2G25430	Putative clathrin assembly protein At2g25430	3.24699e-15	0.891894	72084	SYGDMTEMGGGGGGGGR	TRUE	_S[Phospho]YGDM[Oxidation]TEMGGGGGGGGR_.2	_S[Phospho]YGDM[Oxidation]TEMGGGGGGGGR_	_S[+80]YGDM[+16]TEMGGGGGGGGR_	FALSE					2.42764e+06	2.50577e+06					1.20171e-11	2.17774e-15					39.4802	39.2827					0.995736	0.876728					23.658	22.8561
Q8LFN2	AT3G03770	Probable inactive leucine-rich repeat receptor-like protein kinase At3g03770	0.000285302	0.817896	88186.6	LHVTTLESPR	TRUE	_LHVTTLES[Phospho]PR_.2	_LHVTTLES[Phospho]PR_	_LHVTTLES[+80]PR_	FALSE					598263	436135					0.00318285	0.00287465					62.7759	63.6474					0.99209	0.990496					7.96213	7.75512
Q8LG95	AT4G21190	Pentatricopeptide repeat-containing protein At4g21190	0.00108619	0.778278	35480.9	QLNELSEGEGGLSSDEDK	TRUE	_QLNELS[Phospho]EGEGGLS[Phospho]S[Phospho]DEDK_.2	_QLNELS[Phospho]EGEGGLS[Phospho]S[Phospho]DEDK_	_QLNELS[+80]EGEGGLS[+80]S[+80]DEDK_	FALSE				1		1				0.0068436		0.00334316				63.5001		66.1511				1		1
Q8LGD5	AT3G18690	Protein MKS1	1.92384e-10	0.878066	23581.6	EPVVIYAVSPK	TRUE	_EPVVIYAVS[Phospho]PK_.2	_EPVVIYAVS[Phospho]PK_	_EPVVIYAVS[+80]PK_	FALSE				752565	708288	870327				5.46092e-11	1.79509e-10	1.79648e-21				72.1961	72.5959	72.7566				0.832198	0.998196	0.99732				2.60129	7.31575	6.91912
Q8LL04	AT2G33540	RNA polymerase II C-terminal domain phosphatase-like 3	1.45901e-44	0.953154	136479	IVIEDSDDEK	TRUE	_IVIEDS[Phospho]DDEK_.2	_IVIEDS[Phospho]DDEK_	_IVIEDS[+80]DDEK_	FALSE				159369	207868	189758				0.00272093	0.00261707	0.00995489				43.7179	43.705	43.6638				1	1	1
Q8RWN5	AT5G04280	Glycine-rich RNA-binding protein RZ1C	4.83198e-22	0.909233	33486.2	AGAPYERPSR	TRUE	_AGAPYERPS[Phospho]R_.2	_AGAPYERPS[Phospho]R_	_AGAPYERPS[+80]R_	FALSE				473766	343719	297309				1.22946e-10	1.16198e-07	5.30861e-05				36.0643	35.851	35.4995				0.994979	0.992772	0.788362				6.28903	5.92259	2.31508
Q8RWN5	AT5G04280	Glycine-rich RNA-binding protein RZ1C	4.83198e-22	0.909233	33486.2	SGGGGAYPSSSTFDRY	TRUE	_S[Phospho]GGGGAYPSSSTFDRY_.2	_S[Phospho]GGGGAYPSSSTFDRY_	_S[+80]GGGGAYPSSSTFDRY_	FALSE				339651	313590					0.000105203	3.31146e-11					68.6478	68.8718					0.962536	0.988957					18.3454	19.651
Q8S3U9	AT1G76850	Exocyst complex component SEC5A	2.20154e-35	0.937311	121902	GSQSSGSPINAR	TRUE	_GS[Phospho]QSSGSPINAR_.2	_GS[Phospho]QSSGSPINAR_	_GS[+80]QSSGSPINAR_	FALSE				39131.2	16057.7					0.00398854	0.000315843					33.6077	33.4222					0.939314	0.988713					5.64612	6.73793
Q8S3U9	AT1G76850	Exocyst complex component SEC5A	2.20154e-35	0.937311	121902	GSQSSGSPINAR	TRUE	_GSQS[Phospho]SGSPINAR_.2	_GSQS[Phospho]SGSPINAR_	_GSQS[+80]SGSPINAR_	FALSE				211785	188927	231857				0.00376546	0.00196029	0.00954686				33.9615	33.8848	33.7181				0.75234	0.891962	0.812604				8.11603	9.59904	6.31963
Q8VY05	AT4G34430	SWI/SNF complex subunit SWI3D	3.0216e-12	0.883725	107797	KAEEVSLNSDDR	TRUE	_KAEEVSLNS[Phospho]DDR_.2	_KAEEVSLNS[Phospho]DDR_	_KAEEVSLNS[+80]DDR_	FALSE				114170	54625.1					0.000255437	0.000669554					44.8874	44.8448					0.994638	0.951737					6.223	6.00027
Q8VZ31	AT1G04530	Tetratricopeptide repeat (TPR)-like superfamily protein	7.07825e-22	0.908818	34552.9	DELGFEIERPPSPPMHLAAGLGIDK	TRUE	_DELGFEIERPPS[Phospho]PPMHLAAGLGIDK_.3	_DELGFEIERPPS[Phospho]PPMHLAAGLGIDK_	_DELGFEIERPPS[+80]PPMHLAAGLGIDK_	FALSE					204786	469598					0.0050669	0.00278738					116.356	116.745					1	1
Q8VZ31	AT1G04530	Tetratricopeptide repeat (TPR)-like superfamily protein	7.07825e-22	0.908818	34552.9	SEASLSIYCDSGDGFK	TRUE	_SEAS[Phospho]LSIYC[Carbamidomethyl]DSGDGFK_.2	_SEAS[Phospho]LSIYC[Carbamidomethyl]DSGDGFK_	_SEAS[+80]LSIYC[+57]DSGDGFK_	FALSE				286028	335310					0.000166078	0.000858641					79.5244	79.5717					0.826203	0.799922					8.38761	11.6655
Q8VZM2	AT4G24200	Transcription elongation factor (TFIIS) family protein	1.33354e-13	0.887567	107584	VPSGDLR	TRUE	_VPS[Phospho]GDLR_.2	_VPS[Phospho]GDLR_	_VPS[+80]GDLR_	FALSE				1.21414	1					0.000163372	0.00110323					44.3557	44.3124					1	1
Q8VZT1	AT4G39860	Hematological/neurological-like protein	0.00511593	0.737865	31949.5	GDESPGSADK	TRUE	_GDES[Phospho]PGSADK_.2	_GDES[Phospho]PGSADK_	_GDES[+80]PGSADK_	FALSE				158978	108984	77987.7				0.00394298	0.000858573	0.00648417				16.7272	16.4893	16.6725				0.996197	0.99627	0.988241				6.56806	6.58758	5.43132
Q8VZT4	AT1G29370	RNA polymerase II degradation factor-like protein (DUF1296)	1.59739e-12	0.884535	90888.2	PLAPSTSSLSVAPAESEVR	TRUE	_PLAPSTSSLS[Phospho]VAPAESEVR_.2	_PLAPSTSSLS[Phospho]VAPAESEVR_	_PLAPSTSSLS[+80]VAPAESEVR_	FALSE				171427	160694					9.27465e-16	0.000271171					70.8242	71.2686					0.884804	0.820921					11.7226	9.30719
Q8W4L5	AT2G30470	B3 domain-containing transcription repressor VAL1	5.41773e-34	0.934804	87001.7	LMSPESTTTGHR	TRUE	_LM[Oxidation]S[Phospho]PESTTTGHR_.2	_LM[Oxidation]S[Phospho]PESTTTGHR_	_LM[+16]S[+80]PESTTTGHR_	FALSE				161395	86902.8	81171.7				0.00352135	0.000304482	0.00255947				32.7933	32.3144	32.3039				0.90678	0.996739	0.993216				8.83667	13.2305	11.6027
Q8W4N1	AT3G10980	PLAC8 family protein	3.23058e-28	0.923288	63233.8	NMVSPNLVSPLPR	TRUE	_NM[Oxidation]VSPNLVS[Phospho]PLPR_.2	_NM[Oxidation]VSPNLVS[Phospho]PLPR_	_NM[+16]VSPNLVS[+80]PLPR_	FALSE					51167.3	72239.8					0.0026086	0.00827046					72.3174	72.4785					0.999809	0.91908					14.6543	7.3363
Q8W4N1	AT3G10980	PLAC8 family protein	3.23058e-28	0.923288	63233.8	NISGASSPSPSR	TRUE	_NISGASSPS[Phospho]PSR_.2	_NISGASSPS[Phospho]PSR_	_NISGASSPS[+80]PSR_	FALSE				827271	884558	1.03258e+06				2.35384e-11	4.6614e-09	3.34903e-13				30.9137	30.5594	30.6103				0.955028	0.856082	0.817398				28.7245	24.8422	28.1108
Q93ZH7	AT5G03040	AT5g03040/F15A17_70	2.7039e-34	0.935359	50462.8	SNDDDSKSTISVLSER	TRUE	_SNDDDSKS[Phospho]TIS[Phospho]VLSER_.2	_SNDDDSKS[Phospho]TIS[Phospho]VLSER_	_SNDDDSKS[+80]TIS[+80]VLSER_	FALSE					2459817	1.71762e+06					1.82576e-11	0.000610464					61.1582	61.3947					0.958082	0.84092					37.4933	28.8628
Q93ZH7	AT5G03040	AT5g03040/F15A17_70	2.7039e-34	0.935359	50462.8	EQSNSNNDNAASVK	TRUE	_EQS[Phospho]NS[Phospho]NNDNAASVK_.2	_EQS[Phospho]NS[Phospho]NNDNAASVK_	_EQS[+80]NS[+80]NNDNAASVK_	FALSE					28166.7	40272.4					0.00816856	0.000722176					21.1565	21.1292					0.923226	0.999926					3.40019	10.5109
Q93ZT6	AT5G57870	Eukaryotic translation initiation factor isoform 4G-1	7.17109e-26	0.918188	85571.7	DGPGPLHSPAVSK	TRUE	_DGPGPLHS[Phospho]PAVSK_.2	_DGPGPLHS[Phospho]PAVSK_	_DGPGPLHS[+80]PAVSK_	FALSE				844728	923043					1.0807e-08	2.51685e-20					44.8507	44.6697					0.895912	0.9559					3.15261	4.07619
Q940P1	AT3G09760	At3g09760/F8A24.19	7.32382e-37	0.939977	54127.6	VNFSPMSSPR	TRUE	_VNFS[Phospho]PMSS[Phospho]PR_.2	_VNFS[Phospho]PMSS[Phospho]PR_	_VNFS[+80]PMSS[+80]PR_	FALSE				349502	437666					3.00613e-06	0.0003231					62.9444	62.8012					0.798868	0.908588					16.2804	13.3755
Q941L0	AT5G05170	Cellulose synthase A catalytic subunit 3 [UDP-forming]	5.46274e-22	0.909096	119683	NTGPVSTQAASER	TRUE	_NTGPVS[Phospho]TQAASER_.2	_NTGPVS[Phospho]TQAASER_	_NTGPVS[+80]TQAASER_	FALSE				217555	222734					1.79894e-12	2.59702e-10					35.3909	35.408					0.996598	0.999531					28.9563	24.663
Q949M4	AT4G28760	Methyl-coenzyme M reductase II subunit gamma, putative (DUF3741)	2.4053e-22	0.909956	102904	ASFSPESSVCR	TRUE	_AS[Phospho]FS[Phospho]PESSVC[Carbamidomethyl]R_.2	_AS[Phospho]FS[Phospho]PESSVC[Carbamidomethyl]R_	_AS[+80]FS[+80]PESSVC[+57]R_	FALSE				1		27037.9				0.00285595		0.00136238				57.4378		57.5287				0.997719		0.962189				8.42888		5.44945
Q949M4	AT4G28760	Methyl-coenzyme M reductase II subunit gamma, putative (DUF3741)	2.4053e-22	0.909956	102904	SKSVSDVR	TRUE	_SKS[Phospho]VSDVR_.2	_SKS[Phospho]VSDVR_	_SKS[+80]VSDVR_	FALSE				327359	348892	287784				5.34234e-09	3.86052e-05	1.6829e-05				27.1016	26.7528	26.2855				0.965022	0.85962	0.75919				13.9241	9.62854	6.76728
Q949W6	AT4G31430	Protein KAKU4	5.19035e-18	0.89907	52148.2	NNPDFTEEDLLSAQQPSIQR	TRUE	_NNPDFTEEDLLS[Phospho]AQQPSIQR_.3	_NNPDFTEEDLLS[Phospho]AQQPSIQR_	_NNPDFTEEDLLS[+80]AQQPSIQR_	FALSE				84775.1		289496				0.000420612		0.002425				83.8546		85.9977				0.849545		0.977449				9.62024		8.66842
Q949W6	AT4G31430	Protein KAKU4	5.19035e-18	0.89907	52148.2	LPWGSPAANNLDFR	TRUE	_LPWGS[Phospho]PAANNLDFR_.2	_LPWGS[Phospho]PAANNLDFR_	_LPWGS[+80]PAANNLDFR_	FALSE				236618		161778				0.000585476		0.00664923				95.9417		96.6594				1		1
Q94A43	AT4G36780	BES1/BZR1 homolog protein 2	0.000284492	0.818205	34195	HPLFAISAPSSPTR	TRUE	_HPLFAIS[Phospho]APS[Phospho]SPTR_.2	_HPLFAIS[Phospho]APS[Phospho]SPTR_	_HPLFAIS[+80]APS[+80]SPTR_	FALSE				1.77375e+06		1.02825e+06				0.00106796		8.97905e-08				80.45		81.2283				0.785746		0.838183				3.30903		8.95446
Q94AI7	AT1G15750	Protein TOPLESS	4.24983e-27	0.920895	124298	TPPTNASLDYPSADSEHVSK	TRUE	_TPPT[Phospho]NASLDYPSADSEHVSK_.3	_TPPT[Phospho]NASLDYPSADSEHVSK_	_TPPT[+80]NASLDYPSADSEHVSK_	FALSE					13142232	28070108					4.35685e-07	1.83952e-12					57.1558	57.2567					0.911587	0.948799					35.7429	36.0597
Q94AW8	AT3G44110	Chaperone protein dnaJ 3	0.000182888	0.836542	46444.3	SASPEDLKK	TRUE	_SAS[Phospho]PEDLKK_.2	_SAS[Phospho]PEDLKK_	_SAS[+80]PEDLKK_	FALSE				311904	296520					7.06003e-12	0.000244509					31.7338	31.0861					0.999484	0.988923					8.56798	5.49177
Q94BP0	AT5G62090	Probable transcriptional regulator SLK2	6.90414e-10	0.876156	90547.9	SASINNESYMR	TRUE	_SAS[Phospho]INNESYM[Oxidation]R_.2	_SAS[Phospho]INNESYM[Oxidation]R_	_SAS[+80]INNESYM[+16]R_	FALSE				3.0361e+06	2934580					0.000129779	5.96242e-05					38.3392	38.2338					0.995749	0.997874					44.3208	36.4708
Q94BR1	AT5G63190	MA3 DOMAIN-CONTAINING TRANSLATION REGULATORY FACTOR 1	1.69003e-14	0.889999	77556.2	NDPNYDSGEDAYDGLVDSPVSDPLNDYK	TRUE	_NDPNYDS[Phospho]GEDAYDGLVDSPVSDPLNDYK_.3	_NDPNYDS[Phospho]GEDAYDGLVDSPVSDPLNDYK_	_NDPNYDS[+80]GEDAYDGLVDSPVSDPLNDYK_	FALSE				16472719	15051995					1.91226e-20	6.50386e-15					100.298	100.494					0.958652	0.826815					31.9336	37.2752
Q94CL7	AT4G28610	Protein PHOSPHATE STARVATION RESPONSE 1	1.25574e-12	0.884832	45546.3	TSSIPSTQKPSPVEDSFMR	TRUE	_TSS[Phospho]IPSTQKPSPVEDSFM[Oxidation]R_.3	_TSS[Phospho]IPSTQKPSPVEDSFM[Oxidation]R_	_TSS[+80]IPSTQKPSPVEDSFM[+16]R_	FALSE				1.26426e+06		1.10821e+06				0.00208823		0.00324471				60.3296		61.177				0.9323		0.948404				22.3654		24.1075
Q9ASQ2	AT5G45420	Transcription factor MAMYB	1.43945e-07	0.866773	34362.7	VGYGQILEPEQIHDESSTDNER	TRUE	_VGYGQILEPEQIHDESST[Phospho]DNER_.3	_VGYGQILEPEQIHDESST[Phospho]DNER_	_VGYGQILEPEQIHDESST[+80]DNER_	FALSE				21220954	21115000					1.42772e-13	1.02178e-07					76.2636	77.4827					0.825134	0.753242					24.3943	25.2722
Q9C5S1	AT3G55270	Protein-tyrosine-phosphatase MKP1	1.24573e-22	0.910649	85964.1	AGSDDVGEWPHPPTPSGNK	TRUE	_AGSDDVGEWPHPPT[Phospho]PSGNK_.3	_AGSDDVGEWPHPPT[Phospho]PSGNK_	_AGSDDVGEWPHPPT[+80]PSGNK_	FALSE				1.64726e+06		2.35997e+06				0.00388049		0.00656598				65.0527		66.3823				0.87044		0.844139				13.9968		13.5467
Q9C618	AT1G66890	50S ribosomal-like protein	0.00504822	0.73834	17717.3	SPVIHLR	TRUE	_S[Phospho]PVIHLR_.2	_S[Phospho]PVIHLR_	_S[+80]PVIHLR_	FALSE				15136.3	28146.6	20310.6				0.00374849	0.00137771	0.00441712				56.4514	58.4276	58.9045				1	1	1
Q9C660	AT1G26150	Proline-rich receptor-like protein kinase PERK10	5.328e-12	0.882995	80856.2	TQSSAPLVGNR	TRUE	_TQSS[Phospho]APLVGNR_.2	_TQSS[Phospho]APLVGNR_	_TQSS[+80]APLVGNR_	FALSE				247019		333083				6.5931e-11		4.07154e-10				40.627		40.6181				0.93087		0.846842				4.29328		4.12295
Q9C8J7	AT1G51450	Protein TRAUCO	9.44861e-05	0.844497	55506.6	ANTPNPAAVEDK	TRUE	_ANT[Phospho]PNPAAVEDK_.2	_ANT[Phospho]PNPAAVEDK_	_ANT[+80]PNPAAVEDK_	FALSE				4950003	3.95115e+06					0.00195675	0.00110275					41.5751	41.8094					1	1
Q9C9V7	AT1G67910	AT1G67910 protein	0.00391132	0.746572	9940.33	SIEAASLLDSPPK	TRUE	_S[Phospho]IEAASLLDSPPK_.2	_S[Phospho]IEAASLLDSPPK_	_S[+80]IEAASLLDSPPK_	FALSE					344083	2.36321e+06					0.000640819	0.0039796					73.7126	80.3344					0.928736	0.829963					4.26057	4.86821
Q9C9V9	AT1G67930	Conserved oligomeric Golgi complex subunit 5	2.57125e-14	0.889508	91651.1	ALPPSSPSPSSPSLQR	TRUE	_[Acetyl (Protein N-term)]ALPPSSPS[Phospho]PSSPSLQR_.2	_[Acetyl (Protein N-term)]ALPPSSPS[Phospho]PSSPSLQR_	_[+42]ALPPSSPS[+80]PSSPSLQR_	FALSE				901586	846084					0.000259489	0.000157494					65.282	64.8632					0.801043	0.824019					7.6871	9.5747
Q9C9X0	AT1G68060	Microtubule-associated protein 70-1	2.18996e-07	0.865884	69290.2	QSIGGSDNLQK	TRUE	_QS[Phospho]IGGSDNLQK_.2	_QS[Phospho]IGGSDNLQK_	_QS[+80]IGGSDNLQK_	FALSE				143629		909857				0.00144617		0.00164176				38.0171		41.9101				0.927569		0.830499				3.54994		2.58917
Q9CA42	AT1G68790	Protein CROWDED NUCLEI 3	1.5038e-13	0.887424	127204	IQEGPEGSLQSEMKSDKPR	TRUE	_IQEGPEGS[Phospho]LQS[Phospho]EMKS[Phospho]DKPR_.3	_IQEGPEGS[Phospho]LQS[Phospho]EMKS[Phospho]DKPR_	_IQEGPEGS[+80]LQS[+80]EMKS[+80]DKPR_	FALSE				165935	132249	114449				3.20949e-18	4.06454e-07	0.000272598				58.3238	58.6215	58.8157				1	1	1
Q9CAA4	AT1G69010	Transcription factor BIM2	0.000368277	0.802767	34486.9	ANQGLTHEEPSSK	TRUE	_ANQGLTHEEPS[Phospho]SK_.2	_ANQGLTHEEPS[Phospho]SK_	_ANQGLTHEEPS[+80]SK_	FALSE				100181		75862.1				0.000391255		0.00140072				33.6582		33.045				0.855705		0.854542				10.8073		6.37044
Q9CAF4	AT3G10650	Nuclear pore complex protein NUP1	6.12757e-06	0.857345	135933	PLENGFVTPR	TRUE	_PLENGFVT[Phospho]PR_.2	_PLENGFVT[Phospho]PR_	_PLENGFVT[+80]PR_	FALSE					211332	215525					0.000896695	0.00807356					61.0998	61.0471					1	1
Q9CAF4	AT3G10650	Nuclear pore complex protein NUP1	6.12757e-06	0.857345	135933	TLDECIASPAQLAK	TRUE	_TLDEC[Carbamidomethyl]IAS[Phospho]PAQLAK_.2	_TLDEC[Carbamidomethyl]IAS[Phospho]PAQLAK_	_TLDEC[+57]IAS[+80]PAQLAK_	FALSE				391406	226871	274584				0.000306676	0.00244323	1.42693e-08				71.4139	71.7195	71.8655				0.890278	0.870502	0.85464				3.09358	2.90541	2.77147
Q9FE52	AT5G22840	Protein kinase superfamily protein	0.00145887	0.770642	61175.9	DAENVSQK	TRUE	_DAENVS[Phospho]QK_.2	_DAENVS[Phospho]QK_	_DAENVS[+80]QK_	FALSE				32757.8	47665.9					0.000699814	0.000784748					16.1616	16.0321					1	1
Q9FFH8	AT5G44100	Casein kinase 1-like protein 7	5.79817e-17	0.896401	53593.5	PSSAGGPSESR	TRUE	_PSS[Phospho]AGGPSESR_.2	_PSS[Phospho]AGGPSESR_	_PSS[+80]AGGPSESR_	FALSE				1.01497e+06	1.24036e+06					2.07888e-13	3.11762e-08					17.4791	17.4503					0.878122	0.985607					47.7967	55.5403
Q9FFQ0	AT5G63640	TOM1-like protein 5	3.57238e-28	0.923194	49422.5	GLSLHSR	TRUE	_GLS[Phospho]LHSR_.2	_GLS[Phospho]LHSR_	_GLS[+80]LHSR_	FALSE				72283.4	118701					0.000264472	0.000134484					40.761	40.7616					0.976328	0.969603					4.71951	4.46254
Q9FGK9	AT5G47480	Protein transport protein SEC16A homolog	8.05042e-31	0.92859	145879	SFQNNQLFSPSVGR	TRUE	_SFQNNQLFS[Phospho]PSVGR_.2	_SFQNNQLFS[Phospho]PSVGR_	_SFQNNQLFS[+80]PSVGR_	FALSE				68378.6	55190.1					0.00400605	0.00685103					78.3889	78.6842					0.849448	0.820963					6.45059	5.65037
Q9FH24	AT5G49100	Vitellogenin-like protein	3.06884e-31	0.929466	42050.3	VVGGGGSSSNR	TRUE	_VVGGGGSSS[Phospho]NR_.2	_VVGGGGSSS[Phospho]NR_	_VVGGGGSSS[+80]NR_	FALSE				200180	214535	230403				0.000107845	2.01093e-06	2.00168e-05				14.7259	14.6281	14.7922				0.990876	0.970685	0.992978				17.8312	18.2302	22.6409
Q9FHB7	AT5G05190	At5g52430	1.83825e-11	0.881346	46832.8	LSSSSIGSSK	TRUE	_LSS[Phospho]SSIGSSK_.2	_LSS[Phospho]SSIGSSK_	_LSS[+80]SSIGSSK_	FALSE					1655461	1.71773e+06					0.000927308	0.000959731					33.594	33.5352					0.817526	0.944585					13.59	11.9097
Q9FHD7	AT5G41260	Serine/threonine-protein kinase BSK8	2.0657e-22	0.910115	54625	LSALCCVSESGR	TRUE	_LSALC[Carbamidomethyl]C[Carbamidomethyl]VS[Phospho]ESGR_.2	_LSALC[Carbamidomethyl]C[Carbamidomethyl]VS[Phospho]ESGR_	_LSALC[+57]C[+57]VS[+80]ESGR_	FALSE				338249		504817				6.12878e-11		0.000228414				56.116		56.192				0.752874		0.776332				8.17219		8.31543
Q9FHK4	AT5G05190	Protein ENHANCED DISEASE RESISTANCE 4	5.10929e-11	0.879957	68350.7	EQGASSSSPFSENR	TRUE	_EQGASSSS[Phospho]PFSENR_.2	_EQGASSSS[Phospho]PFSENR_	_EQGASSSS[+80]PFSENR_	FALSE					786977	837802					0.00143028	0.00316146					41.1039	41.0303					0.804583	0.773858					9.5635	7.86813
Q9FHP0	AT5G65910	BSD domain-containing protein	6.83026e-10	0.876174	48198.7	NLTNSGSDSSDKK	TRUE	_NLTNS[Phospho]GSDSSDKK_.2	_NLTNS[Phospho]GSDSSDKK_	_NLTNS[+80]GSDSSDKK_	FALSE				5976.69	4310.21					0.00998122	0.00202269					22.7848	22.6364					0.892756	0.79833					8.09318	5.87456
Q9FIE4	AT5G57370	U4/U6.U5 small nuclear ribonucleoprotein	4.91537e-25	0.916262	26041.5	SRTPDHHAR	TRUE	_S[Phospho]RT[Phospho]PDHHAR_.3	_S[Phospho]RT[Phospho]PDHHAR_	_S[+80]RT[+80]PDHHAR_	FALSE				1.3227e+06	459893					0.00076143	0.00522479					32.2224	31.1469					1	1
Q9FJG3	AT5G17980	C2 calcium/lipid-binding plant phosphoribosyltransferase family protein	0.000213885	0.832951	117930	DPPDSPLAPQWYR	TRUE	_DPPDS[Phospho]PLAPQWYR_.2	_DPPDS[Phospho]PLAPQWYR_	_DPPDS[+80]PLAPQWYR_	FALSE				375195		120782				0.00247625		0.00819744				83.1781		83.3714				0.945571		0.959645				3.85489		4.16885
Q9FJR0	AT5G47010	Regulator of nonsense transcripts 1 homolog	2.81375e-16	0.894645	136868	GEGGAAADHHSEASSPSSLSAGAGNGAK	TRUE	_GEGGAAADHHSEASS[Phospho]PSSLSAGAGNGAK_.3	_GEGGAAADHHSEASS[Phospho]PSSLSAGAGNGAK_	_GEGGAAADHHSEASS[+80]PSSLSAGAGNGAK_	FALSE				791299	1.15984e+06					0.000469536	0.000318612					46.9211	47.2182					0.813098	0.830603					8.23809	8.6581
Q9FKA5	AT5G39570	Uncharacterized protein At5g39570	5.13678e-35	0.936658	43526.2	SEEQEEGSYRK	TRUE	_SEEQEEGS[Phospho]YRK_.2	_SEEQEEGS[Phospho]YRK_	_SEEQEEGS[+80]YRK_	FALSE				155245	490468	523999				1.72689e-08	0.00900746	0.00541217				29.6523	40.6349	40.2996				0.999877	0.831066	0.985272				10.6956	3.28635	5.89628
Q9FKV9	AT5G44290	AT5G44290 protein	1.98035e-10	0.878025	72947.8	MYMSGPLLAQPR	TRUE	_MYMS[Phospho]GPLLAQPR_.2	_MYMS[Phospho]GPLLAQPR_	_MYMS[+80]GPLLAQPR_	FALSE				269461	328837					2.76941e-14	5.35738e-05					83.3832	83.7893					0.988003	0.829951					5.41102	2.58528
Q9FLW9	AT5G52920	Plastidial pyruvate kinase 2	3.75957e-05	0.850255	63521.9	SQSTHNIQVR	TRUE	_SQS[Phospho]THNIQVR_.2	_SQS[Phospho]THNIQVR_	_SQS[+80]THNIQVR_	FALSE				232537	232346	305110				0.000145265	5.22608e-05	0.00461963				37.1586	37.0683	36.6402				0.999006	0.945431	0.940262				9.01288	4.54533	4.50836
Q9FM03	AT5G62940	Dof zinc finger protein DOF5.6	0.0093907	0.715134	39800.8	YGGLLSQSPR	TRUE	_YGGLLSQS[Phospho]PR_.2	_YGGLLSQS[Phospho]PR_	_YGGLLSQS[+80]PR_	FALSE				429614	378168	370762				0.00182881	0.00224823	0.00167499				58.5989	58.8354	58.9375				0.964921	0.994103	0.990541				7.13084	8.01273	7.52325
Q9FMD7	AT5G16590	Probable inactive receptor kinase At5g16590	3.52498e-34	0.935149	67463.4	SIEAAPVPTSSAAVAK	TRUE	_SIEAAPVPTSS[Phospho]AAVAK_.2	_SIEAAPVPTSS[Phospho]AAVAK_	_SIEAAPVPTSS[+80]AAVAK_	FALSE					35865.4	23110.2					7.20751e-05	0.0053719					56.2412	56.7924					0.835531	0.818398					6.53523	8.10516
Q9FNN1	AT5G08570	Pyruvate kinase	5.05757e-10	0.876629	54976.8	GGSTANLVAK	TRUE	_GGS[Phospho]TANLVAK_.2	_GGS[Phospho]TANLVAK_	_GGS[+80]TANLVAK_	FALSE				4195359	1652585	5.71678e+06				0.000236662	0.00257032	0.0075945				37.1121	36.991	36.9009				0.965161	0.930478	0.987762				4.32155	3.59405	5.39086
Q9FQ24	AT3G55005	Protein TONNEAU 1b	8.41189e-11	0.879253	29185.3	SVSASQASGAATSGYR	TRUE	_SVS[Phospho]ASQASGAATSGYR_.2	_SVS[Phospho]ASQASGAATSGYR_	_SVS[+80]ASQASGAATSGYR_	FALSE					623373	1274591					0.00016547	0.000282569					45.6524	45.4263					0.844975	0.813989					21.4312	16.3435
Q9FQ25	AT3G55000	Protein TONNEAU 1a	6.18958e-05	0.847481	29334.3	DSETESSSSLESR	TRUE	_DSETESSSS[Phospho]LESR_.2	_DSETESSSS[Phospho]LESR_	_DSETESSSS[+80]LESR_	FALSE					109983	78838					0.000360526	0.000303435					32.1347	32.4011					0.781154	0.828229					11.6175	16.0353
Q9FRL3	AT1G75220	Sugar transporter ERD6-like 6	3.17669e-19	0.902179	52901.2	QSSMMGSSQVIR	TRUE	_QSS[Phospho]M[Oxidation]M[Oxidation]GS[Phospho]SQVIR_.2	_QSS[Phospho]M[Oxidation]M[Oxidation]GS[Phospho]SQVIR_	_QSS[+80]M[+16]M[+16]GS[+80]SQVIR_	FALSE				575492		223260				1.21828e-10		3.32778e-05				32.6458		32.5098				0.960051		0.944063				29.3181		21.8713
Q9FVQ1	AT1G48920	Nucleolin 1	5.88868e-22	0.909012	58773.4	PAFTPQSGNFR	TRUE	_PAFT[Phospho]PQS[Phospho]GNFR_.2	_PAFT[Phospho]PQS[Phospho]GNFR_	_PAFT[+80]PQS[+80]GNFR_	FALSE				52724.1	89611.9	142810				0.00693234	0.00108264	0.00599864				62.4899	62.3464	62.4946				1	1	1
Q9FVQ1	AT1G48920	Nucleolin 1	5.88868e-22	0.909012	58773.4	NVSVPIDR	TRUE	_NVS[Phospho]VPIDR_.2	_NVS[Phospho]VPIDR_	_NVS[+80]VPIDR_	FALSE					20551.1	823068					0.00633908	0.00569968					54.9446	51.6971					1	1
Q9FXI5	AT1G19870	Protein IQ-DOMAIN 32	3.22008e-30	0.927414	86882.1	TDIDSPDTTNTIK	TRUE	_TDIDS[Phospho]PDT[Phospho]TNT[Phospho]IK_.2	_TDIDS[Phospho]PDT[Phospho]TNT[Phospho]IK_	_TDIDS[+80]PDT[+80]TNT[+80]IK_	FALSE					617673	698575					0.00111284	0.00276532					43.821	44.1024					0.899342	0.768598					14.1552	8.48931
Q9FXI5	AT1G19870	Protein IQ-DOMAIN 32	3.22008e-30	0.927414	86882.1	DATSMGTVEDPK	TRUE	_DATS[Phospho]M[Oxidation]GTVEDPK_.2	_DATS[Phospho]M[Oxidation]GTVEDPK_	_DATS[+80]M[+16]GTVEDPK_	FALSE				161211		242757				0.00183715		3.86119e-06				31.7031		31.3769				0.895911		0.929893				10.7496		15.5817
Q9FY54	AT5G11110	Probable sucrose-phosphate synthase 2	1.86428e-16	0.895104	116966	SGSNNGVDTNLDAEDR	TRUE	_S[Phospho]GS[Phospho]NNGVDTNLDAEDR_.2	_S[Phospho]GS[Phospho]NNGVDTNLDAEDR_	_S[+80]GS[+80]NNGVDTNLDAEDR_	FALSE				1	6883.87					0.00819826	0.00244331					51.0269	51.156					0.983243	0.959935					5.05485	4.13372
Q9FYB7	AT3G53500	Serine/arginine-rich splicing factor RS2Z32	2.45969e-37	0.940848	31822.9	NSASPIVGGGESPVGLNGQDR	TRUE	_NSAS[Phospho]PIVGGGES[Phospho]PVGLNGQDR_.2	_NSAS[Phospho]PIVGGGES[Phospho]PVGLNGQDR_	_NSAS[+80]PIVGGGES[+80]PVGLNGQDR_	FALSE					1	1					0.00594743	0.00293802					64.2345	64.5533					0.898104	0.829202					3.0559	2.34934
Q9FZ45	AT1G16860	Uncharacterized membrane protein At1g16860	2.72611e-37	0.940759	50583	MSGSLASAGSVSMK	TRUE	_M[Oxidation]S[Phospho]GSLASAGSVS[Phospho]M[Oxidation]K_.2	_M[Oxidation]S[Phospho]GSLASAGSVS[Phospho]M[Oxidation]K_	_M[+16]S[+80]GSLASAGSVS[+80]M[+16]K_	FALSE				150442		135644				0.000197477		0.00535915				39.4231		39.3049				0.873256		0.896042				34.3731		40.8396
Q9LES7	AT3G56810	Uncharacterized protein T8M16_140	0.000167545	0.83809	37094.6	ENLLSPSSSWR	TRUE	_ENLLS[Phospho]PSSSWR_.2	_ENLLS[Phospho]PSSSWR_	_ENLLS[+80]PSSSWR_	FALSE				235699		167307				9.97369e-15		0.000312607				81.8349		82.49				0.931445		0.894786				5.25419		4.2392
Q9LF24	AT5G15580	Protein LONGIFOLIA 1	0.0143147	0.698371	104088	QQTESASPR	TRUE	_QQTESAS[Phospho]PR_.2	_QQTESAS[Phospho]PR_	_QQTESAS[+80]PR_	FALSE					2824.27	2103.4					0.00304798	0.00648747					15.4974	30.6621					0.969894	0.99427					6.6741	6.84942
Q9LFE4	AT5G16730	WEB family protein At5g16730, chloroplastic	7.52868e-12	0.882541	96208	KQPEEENGELSESEKDYDLLPK	TRUE	_KQPEEENGELS[Phospho]ESEKDYDLLPK_.3	_KQPEEENGELS[Phospho]ESEKDYDLLPK_	_KQPEEENGELS[+80]ESEKDYDLLPK_	FALSE				2.67107e+06		5820982				0.000295768		0.000349839				89.2946		93.0582				0.874871		0.955448				3.63788		6.76419
Q9LFE4	AT5G16730	WEB family protein At5g16730, chloroplastic	7.52868e-12	0.882541	96208	QPEEENGELSESEK	TRUE	_QPEEENGELS[Phospho]ESEK_.2	_QPEEENGELS[Phospho]ESEK_	_QPEEENGELS[+80]ESEK_	FALSE				351965	367472					0.000163963	1.30441e-12					37.7048	37.7223					0.911453	0.893664					3.33151	3.12873
Q9LIM5	AT3G15095	Chloroplast protein HCF243	1.25499e-15	0.892961	75577.6	MSICSPPK	TRUE	_M[Oxidation]SIC[Carbamidomethyl]S[Phospho]PPK_.2	_M[Oxidation]SIC[Carbamidomethyl]S[Phospho]PPK_	_M[+16]SIC[+57]S[+80]PPK_	FALSE				141227	194918	132496				0.00641694	0.00163314	0.00096822				38.3263	38.098	38.1308				0.996242	0.986664	0.787919				6.57997	5.30384	5.69791
Q9LIM5	AT3G15095	Chloroplast protein HCF243	1.25499e-15	0.892961	75577.6	SGSGYENSNNNNNNNIEPSSPK	TRUE	_SGSGYENSNNNNNNNIEPSS[Phospho]PK_.3	_SGSGYENSNNNNNNNIEPSS[Phospho]PK_	_SGSGYENSNNNNNNNIEPSS[+80]PK_	FALSE				345479		281796				8.39267e-13		1.24122e-05				39.5213		39.3263				0.819878		0.795352				13.9776		10.6147
Q9LJD8	AT3G13530	MAP3K epsilon protein kinase 1	1.45443e-21	0.908046	151177	TPSSVSGNELAR	TRUE	_T[Phospho]PSSVSGNELAR_.2	_T[Phospho]PSSVSGNELAR_	_T[+80]PSSVSGNELAR_	FALSE				1.27764e+06	1319557	998095				6.56113e-09	5.59818e-07	3.20324e-09				42.8204	42.8384	42.7969				0.999663	0.999908	0.99999				10.0932	13.8137	14.0951
Q9LM88	AT1G20670	At1g20670	1.42089e-11	0.881696	72956	ATDILQGSPVESGPTTPLPDK	TRUE	_ATDILQGS[Phospho]PVES[Phospho]GPTTPLPDK_.2	_ATDILQGS[Phospho]PVES[Phospho]GPTTPLPDK_	_ATDILQGS[+80]PVES[+80]GPTTPLPDK_	FALSE				1.28452e+06		1390085				0.000305018		4.06453e-11				79.5223		79.5911				0.94397		0.764103				13.8559		9.23033
Q9LQ43	AT1G59710	Actin cross-linking protein (DUF569)	1.66306e-20	0.905407	36359.1	QESTDSLAVGSPPK	TRUE	_QEST[Phospho]DSLAVGS[Phospho]PPK_.2	_QEST[Phospho]DSLAVGS[Phospho]PPK_	_QEST[+80]DSLAVGS[+80]PPK_	FALSE				594271	608117					4.10183e-13	1.78808e-11					54.7646	54.6483					0.834049	0.894681					16.7285	17.2256
Q9LQM3	AT1G32360	Zinc finger CCCH domain-containing protein 12	4.29138e-12	0.883276	40706	DGVSPNPDTK	TRUE	_DGVS[Phospho]PNPDTK_.2	_DGVS[Phospho]PNPDTK_	_DGVS[+80]PNPDTK_	FALSE					33473.7	54154.2					0.00198317	0.00222979					28.2254	28.0137					0.878689	0.970479					3.7542	4.49269
Q9LRX8	AT3G24830	60S ribosomal protein L13a-2	6.77061e-06	0.857024	23458.9	VSGSGICSK	TRUE	_VS[Phospho]GSGIC[Carbamidomethyl]SK_.2	_VS[Phospho]GSGIC[Carbamidomethyl]SK_	_VS[+80]GSGIC[+57]SK_	FALSE				140449	232533	130303				0.00564792	0.00703624	0.00643912				27.8431	27.9546	27.7115				0.81105	0.840028	0.806843				5.68497	3.35158	3.43883
Q9LSU6	AT3G25570	S-adenosylmethionine decarboxylase proenzyme 3	0.019909	0.683679	38290.3	TVECCSPK	TRUE	_TVEC[Carbamidomethyl]C[Carbamidomethyl]S[Phospho]PK_.2	_TVEC[Carbamidomethyl]C[Carbamidomethyl]S[Phospho]PK_	_TVEC[+57]C[+57]S[+80]PK_	FALSE					18533.3	83704					0.00424024	0.00360051					21.708	21.6804					0.892551	0.973281					3.11707	4.59531
Q9LTA6	AT5G49665	E3 ubiquitin-protein ligase WAV3	0.000282046	0.81946	80236.1	NSDAAAPDLDK	TRUE	_NS[Phospho]DAAAPDLDK_.2	_NS[Phospho]DAAAPDLDK_	_NS[+80]DAAAPDLDK_	FALSE				54447.1	61023	46123.4				5.2097e-11	0.000259707	0.000386344				38.3065	38.1243	38.0342				1	1	1
Q9LTT9	AT3G13290	Varicose-related protein	1.40791e-16	0.895418	145884	ENIFCSQASNLSTEMAR	TRUE	_ENIFC[Carbamidomethyl]SQAS[Phospho]NLSTEM[Oxidation]AR_.3	_ENIFC[Carbamidomethyl]SQAS[Phospho]NLSTEM[Oxidation]AR_	_ENIFC[+57]SQAS[+80]NLSTEM[+16]AR_	FALSE					261927	44372.1					0.00518214	0.00592172					74.1876	74.4576					0.851739	0.859154					12.992	14.5619
Q9LVZ7	AT3G15820	Phosphatidylcholine:diacylglycerol cholinephosphotransferase 1	0.000478222	0.796274	32976.9	SNSLNGNHTNGVAIDGTLDNNNR	TRUE	_SNSLNGNHT[Phospho]NGVAIDGTLDNNNR_.3	_SNSLNGNHT[Phospho]NGVAIDGTLDNNNR_	_SNSLNGNHT[+80]NGVAIDGTLDNNNR_	FALSE					217585	89703.3					0.000475377	0.000211692					63.2536	63.8179					0.774587	0.827817					10.4837	11.7023
Q9LX99	AT5G10470	Kinesin-like protein KIN-14A	7.31523e-18	0.898691	141036	NSISTPSLPPK	TRUE	_NS[Phospho]ISTPSLPPK_.2	_NS[Phospho]ISTPSLPPK_	_NS[+80]ISTPSLPPK_	FALSE				164980	786568	400573				0.00224811	0.00176868	0.0013105				56.1758	53.2215	61.562				0.810379	0.853013	0.953334				3.55109	3.85705	5.11557
Q9LXU9	AT5G12900	IRK-interacting protein	1.68766e-15	0.892627	63328.6	SNSIFNSPSITEK	TRUE	_SNSIFNSPS[Phospho]ITEK_.2	_SNSIFNSPS[Phospho]ITEK_	_SNSIFNSPS[+80]ITEK_	FALSE				302029	372730	393182				0.000264006	0.000310558	1.1009e-08				70.2839	70.5876	70.7049				0.903234	0.852403	0.943677				13.5536	12.1189	13.9093
Q9LYR0	AT5G13460	IQ-domain 11	2.3408e-17	0.897404	50820.7	SFDTQSESYSPYK	TRUE	_S[Phospho]FDTQSESYSPYK_.2	_S[Phospho]FDTQSESYSPYK_	_S[+80]FDTQSESYSPYK_	FALSE					195994	128536					0.00184805	0.00337382					62.5748	62.6617					0.824735	0.907247					6.8009	7.81033
Q9LYR0	AT5G13460	IQ-domain 11	2.3408e-17	0.897404	50820.7	SFDTQSESYSPYK	TRUE	_SFDTQS[Phospho]ESYSPYK_.2	_SFDTQS[Phospho]ESYSPYK_	_SFDTQS[+80]ESYSPYK_	FALSE					278696	267703					3.2094e-25	0.00142414					60.5619	60.6016					0.849437	0.769812					9.70174	9.13494
Q9LZ71	AT5G04550	AT5g04550/T32M21_140	4.69553e-28	0.922945	67263.9	VEASDVSSADSDFIGR	TRUE	_VEAS[Phospho]DVS[Phospho]SADS[Phospho]DFIGR_.2	_VEAS[Phospho]DVS[Phospho]SADS[Phospho]DFIGR_	_VEAS[+80]DVS[+80]SADS[+80]DFIGR_	FALSE				1086476	1.71175e+06	1749890				3.6441e-29	1.70938e-07	6.02803e-09				75.2718	74.7186	75.3425				0.929907	0.88125	0.888808				9.66417	7.63645	10.6721
Q9LZ71	AT5G04550	AT5g04550/T32M21_140	4.69553e-28	0.922945	67263.9	VEASDVSSADSDFIGR	TRUE	_VEAS[Phospho]DVSSADSDFIGR_.2	_VEAS[Phospho]DVSSADSDFIGR_	_VEAS[+80]DVSSADSDFIGR_	FALSE				72288.5		261801				0.000284966		0.000254888				70.1128		70.506				0.999353		0.999007				11.063		12.6735
Q9LZ71	AT5G04550	AT5g04550/T32M21_140	4.69553e-28	0.922945	67263.9	VEASDVSSADSDFIGR	TRUE	_VEASDVS[Phospho]SADS[Phospho]DFIGR_.2	_VEASDVS[Phospho]SADS[Phospho]DFIGR_	_VEASDVS[+80]SADS[+80]DFIGR_	FALSE				610422		687353				2.28398e-11		1.02174e-10				71.4491		71.6231				0.758781		0.974711				11.1135		15.344
Q9LZ71	AT5G04550	AT5g04550/T32M21_140	4.69553e-28	0.922945	67263.9	ALQECTSSKTLEK	TRUE	_ALQEC[Carbamidomethyl]TSS[Phospho]KT[Phospho]LEK_.2	_ALQEC[Carbamidomethyl]TSS[Phospho]KT[Phospho]LEK_	_ALQEC[+57]TSS[+80]KT[+80]LEK_	FALSE					352248	342459					0.00870296	0.00860977					38.3277	38.299					0.906895	0.947451					4.30401	5.26973
Q9LZ71	AT5G04550	AT5g04550/T32M21_140	4.69553e-28	0.922945	67263.9	FTGPASGSAATR	TRUE	_FT[Phospho]GPASGSAATR_.2	_FT[Phospho]GPASGSAATR_	_FT[+80]GPASGSAATR_	FALSE				24454.9		7234.12				0.001243		0.00397299				38.9147		38.8576				0.882796		0.827671				4.11779		3.66782
Q9M0I9	AT4G28180	At4g28180	5.42765e-06	0.857729	27609.2	SQSPATR	TRUE	_SQS[Phospho]PATR_.2	_SQS[Phospho]PATR_	_SQS[+80]PATR_	FALSE				157719	162726					1.44499e-19	0.00109093					10.3194	10.3833					0.883368	0.997587					6.11924	10.6521
Q9M2D8	AT3G61260	Uncharacterized protein At3g61260	1.95472e-23	0.912554	23144.3	VTTPAPADTPAPAPAEIPAPAPAPTPADVTK	TRUE	_VTTPAPADT[Phospho]PAPAPAEIPAPAPAPTPADVTK_.3	_VTTPAPADT[Phospho]PAPAPAEIPAPAPAPTPADVTK_	_VTTPAPADT[+80]PAPAPAEIPAPAPAPTPADVTK_	FALSE					532751	479893					0.00353802	0.000626401					76.5082	76.6697					0.789624	0.800967					7.39	5.36013
Q9M2E8	AT3G61150	Homeobox-leucine zipper protein HDG1	0.0110855	0.708666	88166.7	SESDNAEAVSGDDLDTSDR	TRUE	_S[Phospho]ES[Phospho]DNAEAVS[Phospho]GDDLDTSDR_.2	_S[Phospho]ES[Phospho]DNAEAVS[Phospho]GDDLDTSDR_	_S[+80]ES[+80]DNAEAVS[+80]GDDLDTSDR_	FALSE				1		41790.4				0.00773233		0.00446058				53.2026		53.3693				0.994723		0.987959				11.926		13.6567
Q9M9F9	AT1G78430	Interactor of constitutive active ROPs 4	0.0016285	0.767832	36056.5	FVGSPGMADDSDDGSGK	TRUE	_FVGS[Phospho]PGMADDSDDGSGK_.2	_FVGS[Phospho]PGMADDSDDGSGK_	_FVGS[+80]PGMADDSDDGSGK_	FALSE					723401	483058					0.000313848	0.004408					49.1078	49.2055					0.999997	0.782602					14.3716	5.91264
Q9MA75	AT1G43700	Transcription factor VIP1	1.88494e-23	0.912595	37790.9	FIATSSGEK	TRUE	_FIATSS[Phospho]GEK_.2	_FIATSS[Phospho]GEK_	_FIATSS[+80]GEK_	FALSE				438268	452440	475094				3.19131e-11	3.50868e-07	3.59028e-11				35.8855	35.8259	35.7666				0.988708	0.986723	0.984269				8.95841	8.83347	8.98427
Q9S7I0	AT1G68720	tRNA(adenine(34)) deaminase, chloroplastic	1.32561e-17	0.89803	146564	NDSGNENIESSQHQLK	TRUE	_NDS[Phospho]GNENIESSQHQLK_.3	_NDS[Phospho]GNENIESSQHQLK_	_NDS[+80]GNENIESSQHQLK_	FALSE				240259		461805				0.0028687		0.00566107				42.1033		42.0495				0.825441		0.923447				3.53903		4.46115
Q9S7Z8	AT1G70940	Auxin efflux carrier component 3	4.29312e-26	0.918688	69466.1	GPTPRPSNFEENCAMASSPR	TRUE	_GPTPRPS[Phospho]NFEENC[Carbamidomethyl]AMASSPR_.3	_GPTPRPS[Phospho]NFEENC[Carbamidomethyl]AMASSPR_	_GPTPRPS[+80]NFEENC[+57]AMASSPR_	FALSE				54587.7	37230.7					0.00479347	0.00128885					63.788	64.7217					0.92233	0.996212					9.73046	13.0279
Q9S831	AT4G28750	Photosystem I reaction center subunit IV A, chloroplastic	4.47106e-20	0.904336	14967	AAEDPAPASSSSK	TRUE	_AAEDPAPAS[Phospho]SSSK_.2	_AAEDPAPAS[Phospho]SSSK_	_AAEDPAPAS[+80]SSSK_	FALSE				170072		180382				2.98937e-11		9.30627e-06				22.8537		22.8627				0.885255		0.895779				12.691		9.98959
Q9S841	AT3G50820	Oxygen-evolving enhancer protein 1-2, chloroplastic	1.81346e-32	0.931855	35019.3	GTGTANQCPTIDGGSETFSFK	TRUE	_GTGTANQC[Carbamidomethyl]PTIDGGSETFS[Phospho]FK_.2	_GTGTANQC[Carbamidomethyl]PTIDGGSETFS[Phospho]FK_	_GTGTANQC[+57]PTIDGGSETFS[+80]FK_	FALSE					295104	378303					0.00352775	0.000169047					77.9331	77.9998					0.875675	0.880367					6.42835	5.43108
Q9SF47	AT3G09560	Phosphatidate phosphatase PAH1	4.25279e-38	0.942171	101003	TESDCNR	TRUE	_TES[Phospho]DC[Carbamidomethyl]NR_.2	_TES[Phospho]DC[Carbamidomethyl]NR_	_TES[+80]DC[+57]NR_	FALSE				96577.2		485805				0.000948306		0.000738595				2.04663		2.71256				0.85911		0.791315				2.96513		2.33287
Q9SGN6	AT1G28380	MACPF domain-containing protein NSL1	4.30925e-16	0.894165	67980.1	SGVFSMISTR	TRUE	_S[Phospho]GVFSMIS[Phospho]TR_.2	_S[Phospho]GVFSMIS[Phospho]TR_	_S[+80]GVFSMIS[+80]TR_	FALSE				222546	181689	143809				1.37784e-15	4.42551e-12	0.000372142				92.6184	92.5665	92.8591				0.845199	0.952917	0.796315				12.9411	23.3588	12.6283
Q9SGW5	AT1G64500	F1N19.7	5.46966e-13	0.885862	41016.4	PAAVKPPEVDSVKPPATPPR	TRUE	_PAAVKPPEVDSVKPPAT[Phospho]PPR_.3	_PAAVKPPEVDSVKPPAT[Phospho]PPR_	_PAAVKPPEVDSVKPPAT[+80]PPR_	FALSE				4891758		4.80189e+06				0.00240746		0.00191682				66.1338		68.4306				0.753711		0.999912				2.1185		10.3416
Q9SHI0	AT1G17210	F20D23.9 protein	1.53835e-24	0.915133	103090	SDPFSEGNEQVMAFPGAR	TRUE	_S[Phospho]DPFS[Phospho]EGNEQVMAFPGAR_.2	_S[Phospho]DPFS[Phospho]EGNEQVMAFPGAR_	_S[+80]DPFS[+80]EGNEQVMAFPGAR_	FALSE				213003	227682					0.00854744	0.00780085					98.1312	98.1408					1	1
Q9SHI0	AT1G17210	F20D23.9 protein	1.53835e-24	0.915133	103090	ADSVEGTVVDRDGDEVNDDSAGPSK	TRUE	_ADS[Phospho]VEGTVVDRDGDEVNDDSAGPSK_.3	_ADS[Phospho]VEGTVVDRDGDEVNDDSAGPSK_	_ADS[+80]VEGTVVDRDGDEVNDDSAGPSK_	FALSE				128212		83051				8.25834e-05		0.00813777				52.6792		53.1527				0.999819		0.988658				13.6713		8.98624
Q9SJ56	AT2G35940	BEL1-like homeodomain protein 1	1.2319e-11	0.881888	74463.3	TPLDQSNEDSASK	TRUE	_TPLDQSNEDSAS[Phospho]K_.2	_TPLDQSNEDSAS[Phospho]K_	_TPLDQSNEDSAS[+80]K_	FALSE				216531	264639					2.6382e-10	1.47595e-08					32.5049	31.5948					0.990828	0.82476					16.8208	21.1909
Q9SLB9	AT2G42400	Transcription factor VOZ2	0.000262941	0.824793	50566.1	QELDNSPSTK	TRUE	_QELDNS[Phospho]PSTK_.2	_QELDNS[Phospho]PSTK_	_QELDNS[+80]PSTK_	FALSE				61529.8	50200.3	64415.1				0.00190088	0.00249576	1.01627e-10				25.9305	25.7969	25.428				0.851037	0.805104	0.98723				6.49169	3.33767	6.28913
Q9SLD0	AT2G42290	Leucine-rich repeat protein kinase family protein	0.000397195	0.800625	71072.8	ASAYVIGK	TRUE	_AS[Phospho]AY[Phospho]VIGK_.2	_AS[Phospho]AY[Phospho]VIGK_	_AS[+80]AY[+80]VIGK_	FALSE				47240.1	54694.4	137659				0.008323	0.000540374	0.0054869				40.4712	40.4715	40.3328				1	1	1
Q9SLN1	AT2G23360	Filament-like plant protein 7	3.37534e-10	0.877241	101423	QVSEAEK	TRUE	_QVS[Phospho]EAEK_.2	_QVS[Phospho]EAEK_	_QVS[+80]EAEK_	FALSE					44223.7	99557.5					0.00598103	0.00519988					20.81	20.4087					1	1
Q9SMM8	AT3G48710	At3g48710	6.1938e-15	0.891154	52067.4	SPVTPVSERPIR	TRUE	_S[Phospho]PVTPVSERPIR_.2	_S[Phospho]PVTPVSERPIR_	_S[+80]PVTPVSERPIR_	FALSE				303714	328676					0.00176533	0.00649112					51.317	52.4284					0.965712	0.974301					5.03122	5.32842
Q9SNE0	AT3G50270	Anthranilate N-hydroxycinnamoyl/benzoyltransferase-like protein	0.000425038	0.798895	49805.9	VGNTIVIASSPR	TRUE	_VGNTIVIASS[Phospho]PR_.2	_VGNTIVIASS[Phospho]PR_	_VGNTIVIASS[+80]PR_	FALSE					1	1					0.00149323	0.00797627					59.9336	60.0968					0.75415	0.891928					7.31394	6.58657
Q9SRR2	AT3G07540	Formin-like protein 10	1.17802e-16	0.895619	93011.6	TPDAYAR	TRUE	_T[Phospho]PDAYAR_.2	_T[Phospho]PDAYAR_	_T[+80]PDAYAR_	FALSE				42365.2		41527.7				0.000694294		0.000337797				29.8983		29.5423				0.956044		0.920338				4.07961		3.44695
Q9SS80	AT3G09070	Protein OCTOPUS	4.42687e-28	0.923	75440.6	SNSNVSWR	TRUE	_SNS[Phospho]NVS[Phospho]WR_.2	_SNS[Phospho]NVS[Phospho]WR_	_SNS[+80]NVS[+80]WR_	FALSE					88281.5	64568.2					0.00321649	0.00183419					44.3721	44.4999					0.941763	0.910072					4.95442	3.38523
Q9STN3	AT4G08350	Putative transcription elongation factor SPT5 homolog 1	2.79842e-21	0.907342	115405	AYEAPTPGSGWASTPGGSYSDAGTPR	TRUE	_AYEAPTPGSGWAS[Phospho]T[Phospho]PGGSYSDAGTPR_.3	_AYEAPTPGSGWAS[Phospho]T[Phospho]PGGSYSDAGTPR_	_AYEAPTPGSGWAS[+80]T[+80]PGGSYSDAGTPR_	FALSE				204201		198762				2.80429e-12		0.000861393				74.3742		74.6912				0.958898		0.829082				35.1422		29.1846
Q9SUA1	AT4G26630	DEK domain-containing chromatin associated protein	8.14947e-28	0.922435	85249.4	TTSLEKPSEAMAGK	TRUE	_TTS[Phospho]LEKPSEAMAGK_.2	_TTS[Phospho]LEKPSEAMAGK_	_TTS[+80]LEKPSEAMAGK_	FALSE				482449	311074	395080				0.00222675	0.000657803	0.0013745				49.2227	49.1199	49.3407				0.764331	0.760907	0.766901				4.65824	3.95697	4.84891
Q9SUG6	AT4G22150	Plant UBX domain-containing protein 3	0.000508134	0.794927	32926.7	SEPDSDSDSDGPQEYFTGGEK	TRUE	_SEPDS[Phospho]DS[Phospho]DS[Phospho]DGPQEYFTGGEK_.3	_SEPDS[Phospho]DS[Phospho]DS[Phospho]DGPQEYFTGGEK_	_SEPDS[+80]DS[+80]DS[+80]DGPQEYFTGGEK_	FALSE				359336		376020				0.000337149		0.00190132				82.6859		82.925				0.757692		0.791334				22.8113		17.9684
Q9SUG8	AT4G30780	ATP-dependent DNA helicase	9.24222e-17	0.895883	64573.5	VNSLFNLLYK	TRUE	_VNS[Phospho]LFNLLYK_.2	_VNS[Phospho]LFNLLYK_	_VNS[+80]LFNLLYK_	FALSE				439120	312027					0.00136803	0.00252094					110.506	111.034					0.998303	0.995231					7.37738	6.34078
Q9SVW8	AT4G35470	Plant intracellular Ras-group-related LRR protein 4	2.42451e-05	0.85232	60995	KQSSMEIV	TRUE	_KQSS[Phospho]MEIV_.2	_KQSS[Phospho]MEIV_	_KQSS[+80]MEIV_	FALSE				101900		104772				0.000270661		0.00722462				55.3845		55.305				0.99092		0.987943				7.84827		6.97114
Q9SVW8	AT4G35470	Plant intracellular Ras-group-related LRR protein 4	2.42451e-05	0.85232	60995	SDSQSSLNFSER	TRUE	_SDS[Phospho]QSS[Phospho]LNFSER_.2	_SDS[Phospho]QSS[Phospho]LNFSER_	_SDS[+80]QSS[+80]LNFSER_	FALSE					113283	131450					0.00133306	0.00135786					56.0039	56.0903					0.826311	0.859513					14.0824	18.6703
Q9SX98	AT1G47670	Lysine histidine transporter-like 8	1.70104e-14	0.889991	57119.1	FLSPIGTPMK	TRUE	_FLS[Phospho]PIGTPMK_.2	_FLS[Phospho]PIGTPMK_	_FLS[+80]PIGTPMK_	FALSE				1		1				0.0025747		0.00595166				84.1467		84.59				0.973288		0.929641				4.59557		3.58119
Q9SYB8	AT1G51160	Trafficking protein particle complex subunit	4.26845e-12	0.883284	18964.8	NPIYSPGSPIK	TRUE	_NPIYS[Phospho]PGSPIK_.2	_NPIYS[Phospho]PGSPIK_	_NPIYS[+80]PGSPIK_	FALSE				673155	717867					9.89375e-18	4.08622e-15					65.2249	65.5283					0.88518	0.820498					9.35509	8.21414
Q9SZD1	AT4G29000	Protein tesmin/TSO1-like CXC 5	5.58616e-25	0.916133	64635.6	IASSPHGGR	TRUE	_IASS[Phospho]PHGGR_.2	_IASS[Phospho]PHGGR_	_IASS[+80]PHGGR_	FALSE					335730	345616					5.05652e-08	2.36203e-08					20.13	19.743					0.984187	0.980485					6.20419	4.91687
Q9XIB5	AT1G49480	B3 domain-containing protein REM19	3.90477e-12	0.883399	25850.2	KNPNPEEVNSSTPGGDDSENR	TRUE	_KNPNPEEVNSST[Phospho]PGGDDSENR_.3	_KNPNPEEVNSST[Phospho]PGGDDSENR_	_KNPNPEEVNSST[+80]PGGDDSENR_	FALSE				280031		257391				3.17923e-13		0.000239918				39.5023		39.0461				0.815573		0.779491				8.03282		10.2411
Q9XIE0	AT1G59910	Formin-like protein 7	2.40733e-05	0.852351	98582.2	SGETSLAVGK	TRUE	_S[Phospho]GETSLAVGK_.2	_S[Phospho]GETSLAVGK_	_S[+80]GETSLAVGK_	FALSE				192065	195534					0.000107851	1.16155e-06					40.5086	40.5734					0.998312	0.996293					8.07542	7.69083
Q9ZNU3	AT2G46630	Putative extensin	3.69641e-27	0.921039	43246.5	LQSSSSSSSDEGEGK	TRUE	_LQSSSSSS[Phospho]SDEGEGK_.2	_LQSSSSSS[Phospho]SDEGEGK_	_LQSSSSSS[+80]SDEGEGK_	FALSE				106280		97857				0.00443154		0.00135753				19.6445		19.2396				0.784219		0.777854				6.91389		8.06932
Q9ZQC5	AT2G37080	Interactor of constitutive active ROPs 2, chloroplastic	5.94106e-14	0.888522	65857.7	TPVNEIQK	TRUE	_T[Phospho]PVNEIQK_.2	_T[Phospho]PVNEIQK_	_T[+80]PVNEIQK_	FALSE				191863		269338				0.00266118		0.00702801				33.5624		33.2414				1		1
Q9ZVD1	AT2G27090	At2g27090	3.29807e-12	0.883616	83736.7	EESRDSDDDEFDEPTSDTLVR	TRUE	_EESRDS[Phospho]DDDEFDEPTSDTLVR_.3	_EESRDS[Phospho]DDDEFDEPTSDTLVR_	_EESRDS[+80]DDDEFDEPTSDTLVR_	FALSE					644947	1.03788e+06					2.58548e-05	4.18808e-05					70.25	70.7223					0.918824	0.798181					17.13	16.5865
Q9ZVD1	AT2G27090	At2g27090	3.29807e-12	0.883616	83736.7	EEDGTPEEEDDGEDFSFQER	TRUE	_EEDGT[Phospho]PEEEDDGEDFS[Phospho]FQER_.3	_EEDGT[Phospho]PEEEDDGEDFS[Phospho]FQER_	_EEDGT[+80]PEEEDDGEDFS[+80]FQER_	FALSE				127956		99960.6				0.00433918		0.00160633				71.6727		71.8317				1		1
A0A1I9LL89	AT3G53720	Cation/H+ exchanger 20;Cation/H(+) antiporter 20	6.36311e-14	0.888441	83739.8	DLSASQDSTKEELR	TRUE	_DLS[Phospho]AS[Phospho]QDS[Phospho]TKEELR_.2	_DLS[Phospho]AS[Phospho]QDS[Phospho]TKEELR_	_DLS[+80]AS[+80]QDS[+80]TKEELR_	FALSE	100183		142820				5.10194e-05		0.000435251				46.9985		46.826				0.900924		0.98635				6.55694		8.8792
A0A1I9LM16	AT3G02830	Zinc finger protein 1;Zinc finger CCCH domain-containing protein 33	7.2577e-20	0.903791	42074.1	VFTYDNTASETDEVVETSTGK	TRUE	_VFTYDNTAS[Phospho]ETDEVVETSTGK_.2	_VFTYDNTAS[Phospho]ETDEVVETSTGK_	_VFTYDNTAS[+80]ETDEVVETSTGK_	FALSE	10263489	9763171					1.06717e-44	1.44058e-24					80.8608	81.2733					0.965159	0.929824					24.6745	25.994
A0A1I9LMW1	AT3G16560	Protein phosphatase 2C family protein;Probable protein phosphatase 2C 40	3.6955e-07	0.864736	49558.3	VPSSPALSK	TRUE	_VPS[Phospho]SPALSK_.2	_VPS[Phospho]SPALSK_	_VPS[+80]SPALSK_	FALSE		321299	217529					0.00106664	0.00762937					41.0721	40.6839					0.992493	0.979245					6.5775	5.54712
A0A1I9LRS8	AT3G13300	Transducin/WD40 repeat-like superfamily protein;Enhancer of mRNA-decapping protein 4	6.52029e-25	0.915974	133682	VFCSQVSNLSTEMAR	TRUE	_VFC[Carbamidomethyl]S[Phospho]QVSNLSTEM[Oxidation]AR_.2	_VFC[Carbamidomethyl]S[Phospho]QVSNLSTEM[Oxidation]AR_	_VFC[+57]S[+80]QVSNLSTEM[+16]AR_	FALSE	68654.8		48891.7				0.009176		0.000981547				68.6401		69.1796				0.99958		0.999573				9.87276		9.85641
A0A1I9LS39	AT3G14172	GPI-anchored adhesin-like protein	1.29304e-13	0.887605	136724	ASEESEASDDMEK	TRUE	_ASEES[Phospho]EAS[Phospho]DDMEK_.2	_ASEES[Phospho]EAS[Phospho]DDMEK_	_ASEES[+80]EAS[+80]DDMEK_	FALSE		138574	222815					0.00960006	4.91939e-05					34.8891	34.6778					0.956087	0.986747					4.03361	5.29669
A0A1I9LS77	AT3G27260	Global transcription factor group E8;Global transcription factor group E8;Global transcription factor group E8;Transcription factor GTE8	0.000348705	0.804587	91182.6	PSNSSLQR	TRUE	_PSNS[Phospho]SLQR_.2	_PSNS[Phospho]SLQR_	_PSNS[+80]SLQR_	FALSE		47077	100060					4.5078e-05	1.81337e-05					24.5825	24.2148					0.894611	0.969931					3.83188	5.27301
A0A1I9LTA1	AT3G48060	BAH and TFIIS domain-containing protein	4.99756e-20	0.904206	172358	SAPSPGSGGNVSK	TRUE	_S[Phospho]APSPGSGGNVSK_.2	_S[Phospho]APSPGSGGNVSK_	_S[+80]APSPGSGGNVSK_	FALSE	1137300	509476	460719				0.000268075	0.000699561	0.00211724				26.2666	26.3678	26.3358				0.765502	0.973693	0.999928				8.82994	11.1096	16.271
A0A1P8ANH8	AT1G66880	Protein kinase superfamily protein;Protein kinase superfamily protein;LEAF RUST 10 DISEASE-RESISTANCE LOCUS RECEPTOR-LIKE PROTEIN KINASE-like 1.4	5.26267e-25	0.91619	102109	NPTSTTISSSSNHSLLPSISNLANR	TRUE	_NPTSTTISSSSNHSLLPSIS[Phospho]NLANR_.3	_NPTSTTISSSSNHSLLPSIS[Phospho]NLANR_	_NPTSTTISSSSNHSLLPSIS[+80]NLANR_	FALSE	20686456	18038774	13349977				2.10953e-21	1.93015e-21	2.74342e-23				92.1861	93.7659	94.3243				0.963783	0.98616	0.797855				39.086	39.2643	30.7665
A0A1P8AP18	AT1G68690	Protein kinase superfamily protein;Proline-rich receptor-like protein kinase PERK9	0.000279277	0.820564	70041.6	SDSAFFR	TRUE	_SDS[Phospho]AFFR_.2	_SDS[Phospho]AFFR_	_SDS[+80]AFFR_	FALSE	5031.02	27089.2					0.000866564	0.000959997					63.2902	63.6081					0.829733	0.90587					2.58374	3.26422
A0A1P8APH4	AT1G05500	Calcium-dependent lipid-binding (CaLB domain) family protein;Synaptotagmin-5	6.45061e-05	0.847222	47046.3	NDTTDEENASSR	TRUE	_NDTT[Phospho]DEENASSR_.2	_NDTT[Phospho]DEENASSR_	_NDTT[+80]DEENASSR_	FALSE	60189	55054.8	19039.3				0.00164797	4.51119e-08	0.000618241				22.8463	22.8692	22.3896				0.977659	0.750595	0.964914				12.9098	9.07393	17.8262
A0A1P8API4	AT1G73960	Transcription initiation factor TFIID subunit 2	1.02924e-40	0.9468	144110	MTASIGSVK	TRUE	_M[Oxidation]T[Phospho]AS[Phospho]IGS[Phospho]VK_.2	_M[Oxidation]T[Phospho]AS[Phospho]IGS[Phospho]VK_	_M[+16]T[+80]AS[+80]IGS[+80]VK_	FALSE	16474.4		27690.3				0.0085604		0.00445668				35.6089		35.5607				1		1
A0A1P8APP7	AT1G54920	Uncharacterized protein	0.000232661	0.830422	75147.4	SDDDLDGWEFK	TRUE	_S[Phospho]DDDLDGWEFK_.2	_S[Phospho]DDDLDGWEFK_	_S[+80]DDDLDGWEFK_	FALSE	17472.8	22481.5					0.00142696	0.00843096					88.966	89.4114					1	1
A0A1P8APR6	AT1G12900	Glyceraldehyde-3-phosphate dehydrogenase;Glyceraldehyde-3-phosphate dehydrogenase GAPA2, chloroplastic	1.62327e-39	0.944666	47604.4	AAALNIVPTSTGAAK	TRUE	_AAALNIVPTST[Phospho]GAAK_.2	_AAALNIVPTST[Phospho]GAAK_	_AAALNIVPTST[+80]GAAK_	FALSE	4.00007e+06	1.53426e+06	1.50168e+06				9.33392e-33	4.99796e-20	3.98198e-29				65.5816	65.0014	64.9194				0.759374	0.999775	0.986964				25.7797	15.4222	20.3913
A0A1P8AQY7	AT1G79830	Golgin Putative 5;Golgin Putative 5;Golgin candidate 5	1.41443e-26	0.919766	109756	LASMESIR	TRUE	_LAS[Phospho]M[Oxidation]ESIR_.2	_LAS[Phospho]M[Oxidation]ESIR_	_LAS[+80]M[+16]ESIR_	FALSE	40918.9		60715.2				0.00171212		0.00146171				40.9431		40.5632				0.944049		0.936297				10.3192		9.66563
A0A1P8ARG8	AT1G18950	DDT domain superfamily;DDT domain superfamily;DDT domain-containing protein DDR4	1.40652e-09	0.875052	86963.7	IDYQQYEFSDSDK	TRUE	_IDYQQYEFS[Phospho]DS[Phospho]DK_.2	_IDYQQYEFS[Phospho]DS[Phospho]DK_	_IDYQQYEFS[+80]DS[+80]DK_	FALSE	488189	137404					0.00300704	0.00207491					73.8377	74.0261					0.999615	0.958023					10.1472	5.9226
A0A1P8ARZ2	AT1G27500	Tetratricopeptide repeat (TPR)-like superfamily protein;Protein KINESIN LIGHT CHAIN-RELATED 3	2.64098e-18	0.899835	72508.1	NLCELQSSNQSPSR	TRUE	_NLC[Carbamidomethyl]ELQSSNQS[Phospho]PSR_.2	_NLC[Carbamidomethyl]ELQSSNQS[Phospho]PSR_	_NLC[+57]ELQSSNQS[+80]PSR_	FALSE		733939	3.05365e+06					5.33965e-15	4.68332e-07					47.1094	46.8354					0.956956	0.890372					19.8088	17.4821
A0A1P8AUF2	AT1G21580	Zinc finger C-x8-C-x5-C-x3-H type family protein;Zinc finger C-x8-C-x5-C-x3-H type family protein;Zinc finger C-x8-C-x5-C-x3-H type family protein;Zinc finger C-x8-C-x5-C-x3-H type family protein;Uncharacterized protein At1g21580	7.13963e-21	0.906322	225212	LSNAIATSSGK	TRUE	_LSNAIATSS[Phospho]GK_.2	_LSNAIATSS[Phospho]GK_	_LSNAIATSS[+80]GK_	FALSE	106258		125889				0.0014476		0.00349251				35.251		34.8284				0.922198		0.975447				8.34148		9.67659
A0A1P8AXX8	AT2G34310	Uncharacterized protein;Expressed protein	9.30758e-34	0.934327	25295.8	DSDGNLSSPGSQGNEEFGTR	TRUE	_DS[Phospho]DGNLSSPGSQGNEEFGTR_.2	_DS[Phospho]DGNLSSPGSQGNEEFGTR_	_DS[+80]DGNLSSPGSQGNEEFGTR_	FALSE		449477	269604					2.90718e-13	0.000295127					55.9824	56.0706					0.851311	0.949685					16.7074	18.1611
A0A1P8AXX8	AT2G34310	Uncharacterized protein;Expressed protein	9.30758e-34	0.934327	25295.8	DSDGNLSSPGSQGNEEFGTR	TRUE	_DSDGNLSS[Phospho]PGSQGNEEFGTR_.2	_DSDGNLSS[Phospho]PGSQGNEEFGTR_	_DSDGNLSS[+80]PGSQGNEEFGTR_	FALSE		2.40682e+06	2570171					1.62793e-15	4.81353e-24					54.728	54.8943					0.953736	0.946455					37.122	30.7862
A0A1P8AYB1	AT2G17840	Senescence/dehydration-associated protein-like protein;Protein EARLY-RESPONSIVE TO DEHYDRATION 7, chloroplastic	2.27477e-17	0.897437	43055.5	LIATGSGHLIK	TRUE	_LIATGS[Phospho]GHLIK_.2	_LIATGS[Phospho]GHLIK_	_LIATGS[+80]GHLIK_	FALSE	250737	167467					0.00180501	0.000810532					58.0143	59.1043					0.768326	0.775473					2.19888	2.23948
A0A1P8AYN7	AT2G23140	RING-type E3 ubiquitin transferase;RING-type E3 ubiquitin transferase;U-box domain-containing protein 4	2.37914e-19	0.9025	68380.4	EGASPSRPASALGASSPGISGNGYGLDAR	TRUE	_EGASPSRPAS[Phospho]ALGASSPGISGNGYGLDAR_.3	_EGASPSRPAS[Phospho]ALGASSPGISGNGYGLDAR_	_EGASPSRPAS[+80]ALGASSPGISGNGYGLDAR_	FALSE	2.80361e+06		2.87049e+06				2.50775e-22		2.13978e-35				73.1024		74.3855				0.911377		0.901993				30.8506		19.2608
A0A1P8AYQ6	AT2G20790	Clathrin adaptor complexes medium subunit family protein;Clathrin adaptor complexes medium subunit family protein;AP-5 complex subunit mu	1.92638e-09	0.874555	61641.9	KGDGDDEESEDESAENVVNVEDFLVQK	TRUE	_KGDGDDEES[Phospho]EDESAENVVNVEDFLVQK_.3	_KGDGDDEES[Phospho]EDESAENVVNVEDFLVQK_	_KGDGDDEES[+80]EDESAENVVNVEDFLVQK_	FALSE	1.08481e+06	848854					0.00396411	4.15363e-06					104.867	106.597					0.789766	0.810479					2.32352	2.45312
A0A1P8AZ84	AT2G39480	p-glycoprotein 6;ABC transporter B family member 6	2.07867e-09	0.874435	136145	QKSNGSDPESPISPLLISDPQNER	TRUE	_QKS[Phospho]NGS[Phospho]DPES[Phospho]PIS[Phospho]PLLISDPQNER_.3	_QKS[Phospho]NGS[Phospho]DPES[Phospho]PIS[Phospho]PLLISDPQNER_	_QKS[+80]NGS[+80]DPES[+80]PIS[+80]PLLISDPQNER_	FALSE	158897		171978				0.00157459		0.0058976				91.3443		90.8839				0.989648		0.998				6.41298		7.25313
A0A1P8B1R2	AT2G41970	Protein kinase superfamily protein;Protein kinase superfamily protein;Probable protein kinase At2g41970;PTI1-like tyrosine-protein kinase 1;Protein kinase superfamily protein	0.000282046	0.819403	28674.4	ALIGEGSYGR	TRUE	_ALIGEGS[Phospho]YGR_.2	_ALIGEGS[Phospho]YGR_	_ALIGEGS[+80]YGR_	FALSE	31965.3		53753				0.0025796		0.000343705				57.1875		56.1815				0.985515		0.803038				5.22007		2.40539
A0A1P8B3W0	AT4G15790	Uveal autoantigen with coiled-coil/ankyrin	0.000518163	0.794518	20212.6	VEALSTDDNAK	TRUE	_VEALS[Phospho]TDDNAK_.2	_VEALS[Phospho]TDDNAK_	_VEALS[+80]TDDNAK_	FALSE	184935	196463	324045				0.000178788	0.00305541	0.000280456				35.9498	36.0013	35.6223				0.998213	0.999081	0.998757				7.32514	8.49976	8.2985
A0A1P8B5D8	AT4G38550	Phospholipase-like protein (PEARLI 4) family protein	1.99964e-32	0.93176	73739.8	IVSENSTPVHHNYQIVAAETYEQDK	TRUE	_IVSENSTPVHHNY[Phospho]QIVAAETYEQDK_.3	_IVSENSTPVHHNY[Phospho]QIVAAETYEQDK_	_IVSENSTPVHHNY[+80]QIVAAETYEQDK_	FALSE	348847		185555				0.00105901		3.13891e-05				81.7022		87.7137				0.999084		0.995624				12.714		13.1431
A0A1P8B5T4	AT4G21180	DnaJ / Sec63 Brl domains-containing protein;DnaJ protein ERDJ2B	4.79462e-05	0.848983	65732.9	ESSVLSPTLQR	TRUE	_ESS[Phospho]VLSPTLQR_.2	_ESS[Phospho]VLSPTLQR_	_ESS[+80]VLSPTLQR_	FALSE	623504	637977					2.35645e-13	1.13416e-17					57.6887	57.7333					0.996577	0.981472					14.9738	15.9705
A0A1P8B6B8	AT4G34390	Extra-large GTP-binding protein 2;Extra-large guanine nucleotide-binding protein 2	1.39174e-08	0.871239	92777	LSPSSPLSASAR	TRUE	_LSPSS[Phospho]PLSASAR_.2	_LSPSS[Phospho]PLSASAR_	_LSPSS[+80]PLSASAR_	FALSE	364274	276375					0.00142575	2.12799e-11					54.9486	55.2234					0.970652	0.983275					13.318	10.8308
A0A1P8BA43	AT5G22010	Replication factor C subunit 1	1.5646e-08	0.87103	100431	SEQASEDLETADR	TRUE	_SEQAS[Phospho]EDLETADR_.2	_SEQAS[Phospho]EDLETADR_	_SEQAS[+80]EDLETADR_	FALSE		409404	220207					0.00147237	0.00459249					43.3419	43.2494					0.869558	0.971826					11.2795	10.8335
A0A1P8BBM7	AT5G08139	RING/U-box superfamily protein	5.00466e-13	0.88597	31362.3	LITVESGSDDDDGVENER	TRUE	_LITVES[Phospho]GS[Phospho]DDDDGVENER_.2	_LITVES[Phospho]GS[Phospho]DDDDGVENER_	_LITVES[+80]GS[+80]DDDDGVENER_	FALSE	790302	811004					2.6222e-18	3.63385e-17					61.0088	60.9195					0.968299	0.969031					6.93691	7.76624
A0A1P8BCW3	AT5G01220	Sulfoquinovosyldiacylglycerol 2;Sulfoquinovosyl transferase SQD2	0.00696536	0.726457	47524.8	EDDESEIDAPLLDPESLSK	TRUE	_EDDES[Phospho]EIDAPLLDPESLSK_.2	_EDDES[Phospho]EIDAPLLDPESLSK_	_EDDES[+80]EIDAPLLDPESLSK_	FALSE	172359		108092				0.00216461		0.00125989				97.3043		97.5425				0.803466		0.987224				3.10124		6.04046
A0A1P8BF01	AT5G18810	SC35-like splicing factor 28;Serine/arginine-rich SC35-like splicing factor SCL28	0.000354653	0.803971	27941.3	EDDLYSPR	TRUE	_EDDLYS[Phospho]PR_.2	_EDDLYS[Phospho]PR_	_EDDLYS[+80]PR_	FALSE	254864	218399	273831				2.07034e-09	0.00221903	2.03558e-09				47.3403	47.3957	47.0451				0.890866	0.837543	0.93166				3.09962	2.64006	3.61248
A4GSN8	AT1G79280	Nuclear-pore anchor	1.282e-31	0.930199	237040	SPEKEEVQPETLATPTQSPSR	TRUE	_SPEKEEVQPETLAT[Phospho]PTQS[Phospho]PSR_.3	_SPEKEEVQPETLAT[Phospho]PTQS[Phospho]PSR_	_SPEKEEVQPETLAT[+80]PTQS[+80]PSR_	FALSE	1863424	1.70616e+06	1.65638e+06				1.63059e-20	1.19817e-16	3.13682e-21				51.8939	51.9059	52.008				0.982037	0.983612	0.828466				50.434	49.8337	40.6518
A8MS49	AT5G58140	Phototropin 2;Phototropin 2;Phototropin-2	1.4747e-40	0.94651	100789	QSDEASKSFR	TRUE	_QSDEASKS[Phospho]FR_.2	_QSDEASKS[Phospho]FR_	_QSDEASKS[+80]FR_	FALSE	162303	133606	119050				0.00373995	0.00164248	0.000682206				32.4872	32.2087	31.6292				0.932079	0.978356	0.906604				6.10159	7.08099	10.6599
A9LNK9	AT1G30460	30-kDa cleavage and polyadenylation specificity factor 30	7.40427e-15	0.890952	70014.7	GVSGDQQNQDASHDMEQFEVGNSLR	TRUE	_GVS[Phospho]GDQQNQDASHDMEQFEVGNSLR_.3	_GVS[Phospho]GDQQNQDASHDMEQFEVGNSLR_	_GVS[+80]GDQQNQDASHDMEQFEVGNSLR_	FALSE	262772		551974				0.000199657		5.8877e-22				79.0891		80.9634				0.84353		0.813848				11.9269		14.0971
B5TYT3	AT1G11960	CSC1-like protein At1g11960	1.33329e-18	0.900595	88279.9	INTPAVSHASR	TRUE	_INTPAVSHAS[Phospho]R_.2	_INTPAVSHAS[Phospho]R_	_INTPAVSHAS[+80]R_	FALSE		98918	94857.2					0.000719917	7.43592e-14					38.0602	37.6082					0.806301	0.792482					7.62528	6.51719
B9DF92	AT5G19900	AT5G19900 protein	3.14488e-05	0.851128	55518.4	DMVAQDANEEVVENESESDGDDTGGSDAR	TRUE	_DM[Oxidation]VAQDANEEVVENES[Phospho]ES[Phospho]DGDDTGGSDAR_.3	_DM[Oxidation]VAQDANEEVVENES[Phospho]ES[Phospho]DGDDTGGSDAR_	_DM[+16]VAQDANEEVVENES[+80]ES[+80]DGDDTGGSDAR_	FALSE		138811	119864					0.000718155	0.00196005					52.8159	52.7801					0.93471	0.999743					10.8844	17.6228
B9DGK2	AT2G35830	AT2G35830 protein;At2g35830/F11F19.26	0.000177966	0.837052	20231.6	SPVEVNLIPIEATPENFAEYGQVIEASR	TRUE	_S[Phospho]PVEVNLIPIEATPENFAEYGQVIEASR_.3	_S[Phospho]PVEVNLIPIEATPENFAEYGQVIEASR_	_S[+80]PVEVNLIPIEATPENFAEYGQVIEASR_	FALSE		1	227188					0.00137952	0.00223364					114.986	115.04					0.975261	0.862143					10.0277	7.0088
B9DHK3	AT5G14540	AT5G14540 protein	1.79182e-20	0.905326	59097.5	DRNSPESAIISAIDR	TRUE	_DRNSPES[Phospho]AIISAIDR_.3	_DRNSPES[Phospho]AIISAIDR_	_DRNSPES[+80]AIISAIDR_	FALSE	74412.1	147656					0.000444427	0.00051876					97.2547	100.906					0.756188	0.963094					8.26504	8.25436
F4HRE0	AT1G45688	Transmembrane protein	2.50036e-26	0.919212	27078.7	FSGSLKPGSR	TRUE	_FSGS[Phospho]LKPGSR_.2	_FSGS[Phospho]LKPGSR_	_FSGS[+80]LKPGSR_	FALSE	2.15722e+06		93573.2				0.0002813		0.00281096				43.2249		41.2462				0.967837		0.875744				12.3263		5.17154
F4HZK3	AT1G15280	CASC3/Barentsz eIF4AIII binding protein	2.01659e-24	0.91487	63307.5	AVVDSDLSDEEVGTVK	TRUE	_AVVDSDLS[Phospho]DEEVGTVK_.2	_AVVDSDLS[Phospho]DEEVGTVK_	_AVVDSDLS[+80]DEEVGTVK_	FALSE	2403721	1.78579e+06	1.97719e+06				0.0010336	0.00051033	0.00577637				63.8754	64.1103	64.1354				0.989544	0.936532	0.838317				9.2369	7.96349	3.33891
F4I420	AT1G76810	Eukaryotic translation initiation factor 5B	3.67907e-15	0.891748	142116	DDENTIEDEESPEVTFSGK	TRUE	_DDENTIEDEES[Phospho]PEVTFSGK_.2	_DDENTIEDEES[Phospho]PEVTFSGK_	_DDENTIEDEES[+80]PEVTFSGK_	FALSE	721225	558947					0.00667178	3.90227e-19					70.5547	70.6829					0.937579	0.987265					6.08046	10.7125
F4I420	At1g76810	Eukaryotic translation initiation factor 5B	3.67907e-15	0.891748	142116	PASSTPVEEK	TRUE	_PASST[Phospho]PVEEK_.2	_PASST[Phospho]PVEEK_	_PASST[+80]PVEEK_	FALSE		227449	219540					8.85726e-05	0.002195					23	22.7377					0.938249	0.808872					4.97858	3.13584
F4I548	At1g56460	HIT zinc finger and PAPA-1-like domain-containing protein	3.54503e-24	0.914302	59166.9	EAVESDEGSTNGSFQGSNQVR	TRUE	_EAVESDEGS[Phospho]T[Phospho]NGSFQGSNQVR_.3	_EAVESDEGS[Phospho]T[Phospho]NGSFQGSNQVR_	_EAVESDEGS[+80]T[+80]NGSFQGSNQVR_	FALSE	70235	93504.5	52386.6				0.00150336	0.00110893	0.000361462				49.6642	49.5064	49.7752				0.82192	0.775584	0.915614				12.7748	7.9228	13.5212
F4I548	AT1G56460	HIT zinc finger and PAPA-1-like domain-containing protein	3.54503e-24	0.914302	59166.9	AFDDADYVKDDDEEEEEAVSDVELENK	TRUE	_AFDDADYVKDDDEEEEEAVS[Phospho]DVELENK_.3	_AFDDADYVKDDDEEEEEAVS[Phospho]DVELENK_	_AFDDADYVKDDDEEEEEAVS[+80]DVELENK_	FALSE		632044	526847					1.27707e-06	0.00253958					89.2924	89.959					0.967167	0.804174					5.22981	4.48373
F4I576	AT1G63940	Monodehydroascorbate reductase 6;Monodehydroascorbate reductase 6;Monodehydroascorbate reductase, chloroplastic/mitochondrial	0.000280163	0.820294	52115.4	VFEYEGSPR	TRUE	_VFEYEGS[Phospho]PR_.2	_VFEYEGS[Phospho]PR_	_VFEYEGS[+80]PR_	FALSE	381798	449724					0.00219144	0.00133338					52.6105	52.7608					0.996359	0.974212					6.6118	4.63174
F4I9T6	AT1G58250	HYPERSENSITIVE TO PI STARVATION 4;Protein SABRE	4.57531e-10	0.87678	299597	NLPSSPSHSIK	TRUE	_NLPSS[Phospho]PSHSIK_.2	_NLPSS[Phospho]PSHSIK_	_NLPSS[+80]PSHSIK_	FALSE	2.15041e+06		2693748				4.9576e-26		6.88805e-23				42.1723		41.963				0.905425		0.890264				17.7551		20.3178
F4IA60	AT1G78230	Outer arm dynein light chain 1 protein	1.01498e-36	0.939708	76551.2	SCSTLSK	TRUE	_SC[Carbamidomethyl]S[Phospho]TLSK_.2	_SC[Carbamidomethyl]S[Phospho]TLSK_	_SC[+57]S[+80]TLSK_	FALSE	338508		437204				0.00141133		0.00109292				20.0924		19.9697				0.959462		0.965459				9.17444		11.0868
F4ICK7	AT1G32130	Transcription elongation factor (TFIIS) family protein;Protein IWS1 homolog 1	5.80496e-18	0.898945	56327.8	TMDDDNFIDDTGLDPSER	TRUE	_TM[Oxidation]DDDNFIDDTGLDPS[Phospho]ER_.2	_TM[Oxidation]DDDNFIDDTGLDPS[Phospho]ER_	_TM[+16]DDDNFIDDTGLDPS[+80]ER_	FALSE	111709		59119.6				4.40532e-05		0.00668543				83.0342		82.9004				0.794388		0.787643				14.9844		15.3321
F4ICM3	AT1G32230	Poly [ADP-ribose] polymerase;Inactive poly [ADP-ribose] polymerase RCD1	0.00778683	0.722218	63764.5	DNSGVTLEGPK	TRUE	_DNS[Phospho]GVTLEGPK_.2	_DNS[Phospho]GVTLEGPK_	_DNS[+80]GVTLEGPK_	FALSE	183489	178369					0.00260245	0.00376837					46.3488	46.3424					0.980454	0.975307					4.91526	4.67625
F4IDC8	AT1G72500	Inter alpha-trypsin inhibitor, heavy chain-like protein	0.0241665	0.674497	84534.3	EVEGTELLIR	TRUE	_EVEGT[Phospho]ELLIR_.2	_EVEGT[Phospho]ELLIR_	_EVEGT[+80]ELLIR_	FALSE	41317.6		77566				0.00615508		0.00492705				72.9593		73.6256				1		1
F4IHI1	AT2G21470	SUMO-activating enzyme subunit;SUMO-activating enzyme subunit 2	2.98746e-05	0.851368	70054.7	ETENVESEDDDIMEVENPMMVSK	TRUE	_ETENVES[Phospho]EDDDIMEVENPM[Oxidation]MVSK_.3	_ETENVES[Phospho]EDDDIMEVENPM[Oxidation]MVSK_	_ETENVES[+80]EDDDIMEVENPM[+16]MVSK_	FALSE	238529		253354				0.000234205		0.00150775				83.58		83.3238				0.931641		0.816792				24.3053		23.2712
F4IIC2	AT2G06040	F-box/LRR protein	0.0187568	0.686407	84662.8	ENSNEIGNDSR	TRUE	_ENS[Phospho]NEIGNDSR_.2	_ENS[Phospho]NEIGNDSR_	_ENS[+80]NEIGNDSR_	FALSE	45834	126416	8613.76				0.00567065	0.00492379	0.00537307				33.4527	33.2084	27.071				0.923822	0.976278	0.996153				3.49544	5.82801	6.55654
F4IPR3	AT2G24600	Ankyrin repeat family protein	0.000256323	0.826321	66571.9	TNSDLAASEGSGYFTY	TRUE	_TNS[Phospho]DLAASEGSGYFTY_.2	_TNS[Phospho]DLAASEGSGYFTY_	_TNS[+80]DLAASEGSGYFTY_	FALSE		157679	221169					0.000309528	9.69088e-17					91.8154	91.5711					0.881488	0.800526					9.81821	9.9424
F4IXZ6	AT3G49590	Autophagy-related protein 13;Autophagy-related protein 13a	1.0596e-27	0.922191	68458.5	TDAFGDNHQLSPPFSPSGSPSTPR	TRUE	_TDAFGDNHQLS[Phospho]PPFSPSGSPSTPR_.3	_TDAFGDNHQLS[Phospho]PPFSPSGSPSTPR_	_TDAFGDNHQLS[+80]PPFSPSGSPSTPR_	FALSE	2.27345e+06	857544	294674				0.00585393	0.00879722	0.00324594				78.6099	80.0342	80.0634				0.969749	0.905442	0.888456				14.0902	9.70579	11.5548
F4IXZ6	AT3G49590	Autophagy-related protein 13;Autophagy-related protein 13a	1.0596e-27	0.922191	68458.5	STSDALEELR	TRUE	_STS[Phospho]DALEELR_.2	_STS[Phospho]DALEELR_	_STS[+80]DALEELR_	FALSE	291256	243601					1.0204e-08	2.68228e-06					68.2509	68.7304					0.884432	0.974923					3.72824	5.35357
F4J6V1	AT3G52250	Duplicated homeodomain-like superfamily protein	1.94938e-17	0.897608	181750	SPSPVSSIHLER	TRUE	_SPS[Phospho]PVSSIHLER_.2	_SPS[Phospho]PVSSIHLER_	_SPS[+80]PVSSIHLER_	FALSE	13344966	260168					0.00967809	0.00399881					64.9615	65.3965					0.769206	0.894373					3.30245	7.44938
F4J8G7	AT3G05680	Protein virilizer homolog	0.00176887	0.765781	234225	EPSISSDR	TRUE	_EPS[Phospho]ISSDR_.2	_EPS[Phospho]ISSDR_	_EPS[+80]ISSDR_	FALSE	71575		699064				0.00334287		6.54761e-05				32.8561		33.4771				0.960483		0.949522				4.88387		4.62756
F4J9M5	AT3G06010	Probable ATP-dependent DNA helicase CHR12	8.49378e-17	0.895977	126735	DSESDLSELDAPR	TRUE	_DSES[Phospho]DLS[Phospho]ELDAPR_.2	_DSES[Phospho]DLS[Phospho]ELDAPR_	_DSES[+80]DLS[+80]ELDAPR_	FALSE		498376	478384					8.78894e-20	4.72588e-27					67.745	68.0048					0.899603	0.996117					8.95006	7.15387
F4JAP3	AT3G60260	ELMO/CED-12 family protein	0.00473612	0.740558	27909	GLSCVCVQGR	TRUE	_GLS[Phospho]C[Carbamidomethyl]VC[Carbamidomethyl]VQGR_.2	_GLS[Phospho]C[Carbamidomethyl]VC[Carbamidomethyl]VQGR_	_GLS[+80]C[+57]VC[+57]VQGR_	FALSE	17716.1	4950.95					0.00951253	0.00736033					56.5402	56.7075					1	1
F4JFU5	AT3G14350	STRUBBELIG-receptor family 7;STRUBBELIG-receptor family 7;Protein STRUBBELIG-RECEPTOR FAMILY 7	9.96749e-24	0.913252	74386.3	KLDTSLSMNLRPPPSER	TRUE	_KLDTSLS[Phospho]M[Oxidation]NLRPPPSER_.3	_KLDTSLS[Phospho]M[Oxidation]NLRPPPSER_	_KLDTSLS[+80]M[+16]NLRPPPSER_	FALSE	4.65654e+06	977602					5.11836e-05	0.000429273					76.9664	78.6311					0.809075	0.846024					16.6294	18.8327
F4JGB9	AT4G04320	Malonyl-CoA decarboxylase family protein	0.000122081	0.842162	58323.8	GTQSNSPSSTFSEK	TRUE	_GTQSNS[Phospho]PSSTFSEK_.2	_GTQSNS[Phospho]PSSTFSEK_	_GTQSNS[+80]PSSTFSEK_	FALSE	226025		383101				5.85159e-15		1.57479e-07				39.8138		39.4778				0.868507		0.869411				12.1215		14.1036
F4JLS1	AT4G16310	Lysine-specific histone demethylase 1 homolog 3	5.13146e-23	0.911559	179402	AASSTNQDYDLLQGR	TRUE	_AAS[Phospho]S[Phospho]TNQDYDLLQGR_.2	_AAS[Phospho]S[Phospho]TNQDYDLLQGR_	_AAS[+80]S[+80]TNQDYDLLQGR_	FALSE	511091		264343				7.34302e-10		1.23737e-15				77.493		77.2941				0.809734		0.867642				8.08531		8.69546
F4K180	AT5G26742	RNA helicase;DEAD-box ATP-dependent RNA helicase 3, chloroplastic	3.3739e-05	0.850785	70893.3	SFGGSCFICGK	TRUE	_S[Phospho]FGGSC[Carbamidomethyl]FIC[Carbamidomethyl]GK_.2	_S[Phospho]FGGSC[Carbamidomethyl]FIC[Carbamidomethyl]GK_	_S[+80]FGGSC[+57]FIC[+57]GK_	FALSE	640033	690120	552404				0.00165854	9.00468e-05	1.7249e-21				72.5693	72.882	73.0192				0.98454	0.91985	0.981835				5.15388	3.44031	4.98991
F4K3B8	AT5G55060	Rab3 GTPase-activating protein catalytic subunit	7.31889e-17	0.896141	63149.7	STEPSPR	TRUE	_STEPS[Phospho]PR_.2	_STEPS[Phospho]PR_	_STEPS[+80]PR_	FALSE	76468		179078				0.000216601		0.00966991				17.8849		8.86032				0.814145		0.764972				3.5732		2.87328
F4K4Y5	AT5G55660	DEK domain-containing chromatin associated protein	2.34377e-19	0.902518	87206.6	QHEGESETGDK	TRUE	_QHEGES[Phospho]ETGDK_.2	_QHEGES[Phospho]ETGDK_	_QHEGES[+80]ETGDK_	FALSE	67765.7	77745.5					0.00370821	2.91513e-21					21.4759	21.36					0.933946	0.866934					3.64895	2.87412
F4K5Y4	AT5G43310	COP1-interacting protein-like protein	7.00064e-28	0.92257	130646	FSDSEPGSLSPLQR	TRUE	_FS[Phospho]DS[Phospho]EPGS[Phospho]LS[Phospho]PLQR_.2	_FS[Phospho]DS[Phospho]EPGS[Phospho]LS[Phospho]PLQR_	_FS[+80]DS[+80]EPGS[+80]LS[+80]PLQR_	FALSE	18757.9	1.23566	1				0.00937845	0.00745784	0.0094678				74.8901	76.3547	79.1841				1	1	1
F4K735	AT5G28350	Quinoprotein amine dehydrogenase, beta chain-like RIC1-like guanyl-nucleotide exchange factor;Quinoprotein amine dehydrogenase, beta chain-like RIC1-like guanyl-nucleotide exchange factor	1.35966e-12	0.884734	126776	EGELDNDNLSSDLSDREPSR	TRUE	_EGELDNDNLS[Phospho]S[Phospho]DLSDREPSR_.3	_EGELDNDNLS[Phospho]S[Phospho]DLSDREPSR_	_EGELDNDNLS[+80]S[+80]DLSDREPSR_	FALSE	102983	205484					0.00219154	0.00211207					67.6503	72.1151					0.909337	0.880191					5.496	4.38066
F4K8I1	AT5G28450	Chlorophyll a-b binding protein, chloroplastic;Photosystem I chlorophyll a/b-binding protein 2, chloroplastic	7.44665e-06	0.856712	18948	PGSVNTDPVFPNNK	TRUE	_PGSVNT[Phospho]DPVFPNNK_.2	_PGSVNT[Phospho]DPVFPNNK_	_PGSVNT[+80]DPVFPNNK_	FALSE	355925	289087					2.03465e-13	4.06876e-16					57.8594	57.8427					0.824207	0.96632					2.54512	4.96263
F4K8S9	AT5G44180	Homeodomain-like transcriptional regulator;Homeobox-DDT domain protein RLT2	1.32987e-15	0.892896	169583	GSGGSGVTVVR	TRUE	_GS[Phospho]GGSGVTVVR_.2	_GS[Phospho]GGSGVTVVR_	_GS[+80]GGSGVTVVR_	FALSE	64141.9		103233				0.000223568		1.41642e-05				37.6736		37.4435				0.998941		0.813247				9.66482		5.08484
F4KB54	AT5G43310	DDT domain-containing protein	0.00197896	0.763101	84399.3	NSAQVLESSEDSKKNESTAGGSK	TRUE	_NSAQVLES[Phospho]S[Phospho]EDS[Phospho]KKNESTAGGSK_.3	_NSAQVLES[Phospho]S[Phospho]EDS[Phospho]KKNESTAGGSK_	_NSAQVLES[+80]S[+80]EDS[+80]KKNESTAGGSK_	FALSE	103079	186502	196441				0.00130171	0.00643769	9.95106e-05				35.7462	35.7359	35.2797				0.999541	0.999996	0.999996				37.6975	37.9436	42.5561
F4KFC9	AT5G09860	Nuclear matrix protein-like protein;THO complex subunit 1	7.32315e-08	0.868127	68205.9	GDAETMESDAIADTPTPEEQQR	TRUE	_GDAETM[Oxidation]ESDAIADTPT[Phospho]PEEQQR_.3	_GDAETM[Oxidation]ESDAIADTPT[Phospho]PEEQQR_	_GDAETM[+16]ESDAIADTPT[+80]PEEQQR_	FALSE		288827	160959					0.00190848	1.36881e-19					53.1958	53.0681					0.94546	0.761496					18.1185	14.1349
F4KHD8	AT5G40480	Nuclear pore complex protein GP210	3.39765e-12	0.883575	210666	QVPTGATGTATYSGNAAQGTPER	TRUE	_QVPTGATGTATYSGNAAQGT[Phospho]PER_.3	_QVPTGATGTATYSGNAAQGT[Phospho]PER_	_QVPTGATGTATYSGNAAQGT[+80]PER_	FALSE	213581		116886				0.00485231		7.0366e-10				47.7138		47.6498				0.792969		0.821713				12.6886		7.19456
O04203	AT2G40000	Nematode resistance protein-like HSPRO2	0.000183351	0.836494	49243.8	MVSSDLPNSPK	TRUE	_M[Oxidation]VSSDLPNS[Phospho]PK_.2	_M[Oxidation]VSSDLPNS[Phospho]PK_	_M[+16]VSSDLPNS[+80]PK_	FALSE	368373	629697	599751				0.000631557	0.00323699	7.07496e-20				40.6591	40.6674	40.3401				0.999769	0.999593	0.999968				13.5694	12.3377	19.8546
O04211	AT2G40080	Protein EARLY FLOWERING 4	1.79419e-14	0.889927	12375.6	SLIQQVNDNHQSR	TRUE	_S[Phospho]LIQQVNDNHQSR_.2	_S[Phospho]LIQQVNDNHQSR_	_S[+80]LIQQVNDNHQSR_	FALSE	2487715		1238859				0.0048197		0.00141665				48.8225		49.393				0.986256		0.998138				6.31096		7.28398
O22446	AT4G38130	Histone deacetylase 19	2.76146e-17	0.897221	56022.9	LQHAPSVPFQERPPDTETPEVDEDQEDGDKR	TRUE	_LQHAPS[Phospho]VPFQERPPDTETPEVDEDQEDGDKR_.4	_LQHAPS[Phospho]VPFQERPPDTETPEVDEDQEDGDKR_	_LQHAPS[+80]VPFQERPPDTETPEVDEDQEDGDKR_	FALSE		1.09312e+06	1.67233e+06					7.33274e-11	0.000194164					89.5609	92.6569					0.951599	0.894405					4.67178	6.23029
O22666	AT3G08900	UDP-arabinopyranose mutase 3;UDP-arabinopyranose mutase 2;Probable UDP-arabinopyranose mutase 4;UDP-arabinopyranose mutase 1	0.000141094	0.840514	41281.6	ASNPFVNLK	TRUE	_AS[Phospho]NPFVNLK_.2	_AS[Phospho]NPFVNLK_	_AS[+80]NPFVNLK_	FALSE	282614		96962.8				0.00393272		3.28205e-21				73.7811		74.3021				1		1
O23052	AT1G05150	Uncharacterized TPR repeat-containing protein At1g05150	2.79484e-29	0.925488	90169.4	ADNNNNNVDAFSDAGWSR	TRUE	_ADNNNNNVDAFSDAGWS[Phospho]R_.2	_ADNNNNNVDAFSDAGWS[Phospho]R_	_ADNNNNNVDAFSDAGWS[+80]R_	FALSE	990754	727026	854934				1.33968e-25	0.00105641	5.41577e-13				73.6628	74.2823	74.2991				0.991505	0.996489	0.974216				5.75977	6.64824	4.63187
O23174	AT4G37120	Pre-mRNA-splicing factor SLU7-B	1.10256e-08	0.871647	62056.3	NNNENGDDATSDGEEDLDDLR	TRUE	_NNNENGDDATS[Phospho]DGEEDLDDLR_.2	_NNNENGDDATS[Phospho]DGEEDLDDLR_	_NNNENGDDATS[+80]DGEEDLDDLR_	FALSE	1.54109e+06	1.45552e+06	1.57248e+06				2.98618e-23	1.9554e-15	2.04492e-23				65.7464	65.8736	65.9156				0.971665	0.995222	0.999257				4.5349	6.33886	8.20454
O48683	At1g24160	F3I6.9 protein	2.84608e-16	0.89463	59547.3	EKVSPLLSK	TRUE	_EKVS[Phospho]PLLSK_.2	_EKVS[Phospho]PLLSK_	_EKVS[+80]PLLSK_	FALSE	85154.8	88847					0.00531314	0.00418278					49.1375	49.5169					0.930745	0.818962					3.59819	2.50933
O49160	AT3G56150	Eukaryotic translation initiation factor 3 subunit C	6.19971e-20	0.903965	102949	YLQSGSEDDDDTDTK	TRUE	_YLQS[Phospho]GSEDDDDTDTK_.2	_YLQS[Phospho]GSEDDDDTDTK_	_YLQS[+80]GSEDDDDTDTK_	FALSE	284663	281758					1.37528e-08	2.9591e-11					36.6392	36.7378					0.930078	0.91318					25.9064	27.9626
O64639	AT2G45590	Receptor-like serine/threonine-protein kinase At2g45590	0.00409631	0.745195	75554.3	VKSEDFDTR	TRUE	_VKS[Phospho]EDFDTR_.2	_VKS[Phospho]EDFDTR_	_VKS[+80]EDFDTR_	FALSE	522425	227606					0.00570167	0.00291249					39.7855	39.6084					0.940288	0.994394					3.75665	6.17827
O64903	AT5G63310	Nucleoside diphosphate kinase II, chloroplastic	5.96184e-08	0.86853	25550.4	NIVHGSDSPENGK	TRUE	_NIVHGS[Phospho]DSPENGK_.2	_NIVHGS[Phospho]DSPENGK_	_NIVHGS[+80]DSPENGK_	FALSE	1.06817e+06	363528	338165				0.000189806	1.21833e-11	2.68952e-23				33.5832	35.7264	34.8067				0.992404	0.990658	0.752738				18.2915	9.22888	12.2971
O65282	AT5G20720	20 kDa chaperonin, chloroplastic	6.94302e-19	0.901324	26801.9	YAGTEVEFNDVK	TRUE	_Y[Phospho]AGTEVEFNDVK_.2	_Y[Phospho]AGTEVEFNDVK_	_Y[+80]AGTEVEFNDVK_	FALSE	613789	532243					5.14552e-09	0.00097415					60.7393	61.0646					0.983374	0.950108					5.08001	3.94672
O65570	AT4G30160	Villin-4	5.71143e-34	0.934756	109327	SMSFSPDR	TRUE	_S[Phospho]MS[Phospho]FS[Phospho]PDR_.2	_S[Phospho]MS[Phospho]FS[Phospho]PDR_	_S[+80]MS[+80]FS[+80]PDR_	FALSE	172690		129204				0.00664186		0.00361406				57.414		57.2857				1		1
O65655	At4g39680	SAP domain-containing protein	4.08664e-21	0.90693	69442.2	TSVGGGDDSNAANADMIK	TRUE	_TSVGGGDDS[Phospho]NAANADM[Oxidation]IK_.2	_TSVGGGDDS[Phospho]NAANADM[Oxidation]IK_	_TSVGGGDDS[+80]NAANADM[+16]IK_	FALSE	266414		76382.8				0.00110241		0.00511985				42.2348		47.0874				0.951871		0.995139				10.2074		7.0147
O80939	AT2G37710	L-type lectin-domain containing receptor kinase IV.1	1.41461e-18	0.900531	75541.5	GFTGGSSIADSQLSGGR	TRUE	_GFTGGSS[Phospho]IADSQLSGGR_.2	_GFTGGSS[Phospho]IADSQLSGGR_	_GFTGGSS[+80]IADSQLSGGR_	FALSE		557823	628276					3.54835e-05	4.14038e-14					67.2039	64.5542					0.837394	0.927157					11.6521	11.8896
O81834	AT4G27310	B-box type zinc finger family protein	0.000210414	0.833399	24134.8	GQEEVNSFESEEDR	TRUE	_GQEEVNSFES[Phospho]EEDR_.2	_GQEEVNSFES[Phospho]EEDR_	_GQEEVNSFES[+80]EEDR_	FALSE	77102.5		72075.8				0.00101529		0.00621307				53.2252		53.11				0.938405		0.889354				4.89765		3.08416
O82201	AT2G19790	AP-4 complex subunit sigma	0.00173433	0.766277	16920.7	ANILSPIQLMDK	TRUE	_ANILS[Phospho]PIQLM[Oxidation]DK_.2	_ANILS[Phospho]PIQLM[Oxidation]DK_	_ANILS[+80]PIQLM[+16]DK_	FALSE	255802		186110				0.000150673		0.00134708				86.7175		86.8404				1		1
P0DH79	AT5G50640	CBS domain-containing protein CBSCBSPB5;CBS domain-containing protein CBSCBSPB4	5.71012e-28	0.922756	59812.4	FWDSAMALSPNEDGDETR	TRUE	_FWDSAM[Oxidation]ALS[Phospho]PNEDGDETR_.2	_FWDSAM[Oxidation]ALS[Phospho]PNEDGDETR_	_FWDSAM[+16]ALS[+80]PNEDGDETR_	FALSE	225160	131716	206688				0.000947499	0.005121	1.09199e-06				73.8498	74.4542	74.487				0.814329	0.804415	0.948087				9.12155	8.56006	13.7914
P10797	AT5G38420	Ribulose bisphosphate carboxylase small chain 2B, chloroplastic	2.15122e-40	0.946191	20350.3	LPLFGCTDSAQVLK	TRUE	_LPLFGC[Carbamidomethyl]T[Phospho]DSAQVLK_.2	_LPLFGC[Carbamidomethyl]T[Phospho]DSAQVLK_	_LPLFGC[+57]T[+80]DSAQVLK_	FALSE	2.25147e+06	2.26312e+06	2.37397e+06				3.02877e-38	7.89177e-20	1.16307e-18				94.4444	94.9567	94.6795				0.993778	0.988317	0.99531				13.4305	9.04568	14.0452
P43288	AT5G26751	Shaggy-related protein kinase alpha	9.73515e-20	0.90347	46035.4	ASVGIAPNPGAR	TRUE	_[Acetyl (Protein N-term)]AS[Phospho]VGIAPNPGAR_.2	_[Acetyl (Protein N-term)]AS[Phospho]VGIAPNPGAR_	_[+42]AS[+80]VGIAPNPGAR_	FALSE	1	16424.9					0.00184746	0.00189907					58.9842	58.7067					1	1
P56757	ATCG00120	ATP synthase subunit alpha, chloroplastic	3.61073e-27	0.921063	55328.3	LIESPAPGIISR	TRUE	_LIES[Phospho]PAPGIISR_.2	_LIES[Phospho]PAPGIISR_	_LIES[+80]PAPGIISR_	FALSE	60831.6		57437.5				0.000101472		0.00127526				68.1568		68.82				0.999843		0.999844				9.76094		9.76448
P59230	AT2G27530	60S ribosomal protein L10a-2;60S ribosomal protein L10a-3;60S ribosomal protein L10a-1	0.00375309	0.747752	24424.9	LQSEAVR	TRUE	_LQS[Phospho]EAVR_.2	_LQS[Phospho]EAVR_	_LQS[+80]EAVR_	FALSE		84417.8	121828					0.00074719	0.000424681					30.183	29.7856					1	1
P93017	AT2G33830	Dormancy-associated protein homolog 1	1.82345e-21	0.907801	11656	TVAAVAGSPGTPTTPGSAR	TRUE	_TVAAVAGS[Phospho]PGTPTTPGSAR_.2	_TVAAVAGS[Phospho]PGTPTTPGSAR_	_TVAAVAGS[+80]PGTPTTPGSAR_	FALSE		23244602	26160140					7.80522e-35	1.64484e-43					47.7278	47.4851					0.995997	0.978303					69.6191	56.9694
Q01908	AT4G04640	ATP synthase gamma chain 1, chloroplastic	5.8606e-30	0.92688	40911.1	SLSMVYNR	TRUE	_SLS[Phospho]M[Oxidation]VYNR_.2	_SLS[Phospho]M[Oxidation]VYNR_	_SLS[+80]M[+16]VYNR_	FALSE	158119	237026	202250				0.00682105	1.43934e-06	5.29788e-09				54.0624	54.2136	54.0257				0.99367	0.991925	0.990708				15.1011	18.5427	17.6016
Q2V3X4	AT3G09630	Ribosomal protein L4/L1 family;60S ribosomal protein L4-1	0.00420593	0.744389	44573	IENVPEMPLVVSDSAEAVEK	TRUE	_IENVPEM[Oxidation]PLVVS[Phospho]DSAEAVEK_.3	_IENVPEM[Oxidation]PLVVS[Phospho]DSAEAVEK_	_IENVPEM[+16]PLVVS[+80]DSAEAVEK_	FALSE		29547.4	68312					0.00314085	0.00183577					75.6191	75.7457					0.775353	0.985121					7.05545	5.1928
Q39172	AT5G16970	NADPH-dependent oxidoreductase 2-alkenal reductase	6.17777e-10	0.876327	38133.7	EESDLTAALK	TRUE	_EES[Phospho]DLTAALK_.2	_EES[Phospho]DLTAALK_	_EES[+80]DLTAALK_	FALSE	218294	332220					1.70478e-08	5.08101e-15					63.6494	63.8385					0.750249	0.912357					2.09994	3.34276
Q39227	AT1G20330	24-methylenesterol C-methyltransferase 2	6.88789e-11	0.879537	40450.2	KPESPEESS	TRUE	_KPESPEES[Phospho]S_.2	_KPESPEES[Phospho]S_	_KPESPEES[+80]S_	FALSE		4381357	4.91926e+06					1.39751e-16	1.82317e-24					18.8967	18.6471					0.776281	0.818164					39.3795	34.9253
Q3ECU3	AT1G48610	AT hook motif-containing protein;Putative DNA-binding protein At1g48610	1.21246e-12	0.884877	20207.9	SGTPGDASGNKPQTDATGVSATDTASQK	TRUE	_SGT[Phospho]PGDASGNKPQTDATGVSATDTASQK_.3	_SGT[Phospho]PGDASGNKPQTDATGVSATDTASQK_	_SGT[+80]PGDASGNKPQTDATGVSATDTASQK_	FALSE	3.88196e+06		6.08966e+06				1.10634e-08		1.41995e-09				40.499		40.1642				0.91061		0.758909				41.9985		26.7741
Q42438	AT5G19450	Calcium-dependent protein kinase 8	3.59046e-18	0.899488	59940.5	SNPFYSEAYTTNGSGTGFK	TRUE	_SNPFYSEAYTTNGS[Phospho]GTGFK_.2	_SNPFYSEAYTTNGS[Phospho]GTGFK_	_SNPFYSEAYTTNGS[+80]GTGFK_	FALSE	1.96398e+06	1.71303e+06					1.52818e-18	6.94612e-25					80.2855	80.8604					0.896892	0.98517					16.9482	22.8277
Q500V3	AT2G12550	At2g12550	0.00366715	0.748375	62081.4	VDALSAYDINLDK	TRUE	_VDALS[Phospho]AYDINLDK_.2	_VDALS[Phospho]AYDINLDK_	_VDALS[+80]AYDINLDK_	FALSE		227822	210927					0.000773007	0.00124366					90.1381	89.8153					0.946114	0.814827					3.86549	2.48168
Q5PP33	AT5G19500	At5g19500	0.0168866	0.691217	54357.6	LFSNLNQSTLK	TRUE	_LFS[Phospho]NLNQSTLK_.2	_LFS[Phospho]NLNQSTLK_	_LFS[+80]NLNQSTLK_	FALSE	561940	455245	421834				0.0063348	0.00264664	0.00598806				88.3966	88.7838	88.5848				0.948509	0.992496	0.997154				4.60663	6.57794	7.55227
Q5W7F2	AT5G13300	ADP-ribosylation factor GTPase-activating protein AGD3	4.44384e-05	0.849395	92524.2	LPGSPMGSGHHR	TRUE	_LPGS[Phospho]PMGSGHHR_.2	_LPGS[Phospho]PMGSGHHR_	_LPGS[+80]PMGSGHHR_	FALSE	14346.1		50211.1				0.000578043		0.00482432				53.6382		58.2242				0.937575		0.901415				3.70934		3.21304
Q66GQ5	AT2G34410	Protein REDUCED WALL ACETYLATION 3	5.91675e-05	0.847761	63331.5	VHSDNNLVELGEVK	TRUE	_VHS[Phospho]DNNLVELGEVK_.2	_VHS[Phospho]DNNLVELGEVK_	_VHS[+80]DNNLVELGEVK_	FALSE	444405	248813					2.74405e-10	0.000138552					70.7708	71.8699					1	1
Q680Q4	AT5G60410	E3 SUMO-protein ligase SIZ1	2.71542e-05	0.851816	97033.8	SEANDGLVDNPLAFGR	TRUE	_S[Phospho]EANDGLVDNPLAFGR_.2	_S[Phospho]EANDGLVDNPLAFGR_	_S[+80]EANDGLVDNPLAFGR_	FALSE		68997.1	17084.9					0.000237849	1.54935e-10					92.2934	92.0336					1	1
Q6A333	AT3G05380	Protein ALWAYS EARLY 2	1.21815e-06	0.861902	117780	VSESPNR	TRUE	_VSES[Phospho]PNR_.2	_VSES[Phospho]PNR_	_VSES[+80]PNR_	FALSE	4416.08		381.105				0.00721745		0.00699339				11.972		11.8033				0.932601		0.91892				3.62735		3.42777
Q6NLQ6	AT3G57530	Calcium-dependent protein kinase 32	6.66232e-15	0.891071	60935.4	FNSISLK	TRUE	_FNS[Phospho]ISLK_.2	_FNS[Phospho]ISLK_	_FNS[+80]ISLK_	FALSE	1.21041e+06		857379				8.37759e-18		9.97725e-19				57.8577		57.9766				0.923623		0.989155				3.49263		5.51317
Q84L08	AT5G19980	GDP-fucose transporter 1	8.9989e-07	0.862652	37385.7	VSEKDSEKGEEDEELTQLVPGK	TRUE	_VSEKDS[Phospho]EKGEEDEELTQLVPGK_.3	_VSEKDS[Phospho]EKGEEDEELTQLVPGK_	_VSEKDS[+80]EKGEEDEELTQLVPGK_	FALSE	7400435	7777581	5633544				4.81977e-28	2.97497e-13	3.50016e-23				82.3821	84.3275	86.4604				0.914915	0.771105	0.999482				11.2472	6.1687	11.7977
Q8GUH2	AT1G01500	Uncharacterized protein At1g01500	0.0160803	0.693397	35925.6	TIQASPR	TRUE	_TIQAS[Phospho]PR_.2	_TIQAS[Phospho]PR_	_TIQAS[+80]PR_	FALSE	195584	165198					0.00279237	0.00466062					24.9509	24.9285					0.993059	0.976106					5.96336	4.70994
Q8GXA4	AT4G26455	WPP domain-interacting protein 1	6.57445e-05	0.847103	53901.6	SLDNGSCSDESVK	TRUE	_S[Phospho]LDNGSC[Carbamidomethyl]SDESVK_.2	_S[Phospho]LDNGSC[Carbamidomethyl]SDESVK_	_S[+80]LDNGSC[+57]SDESVK_	FALSE		10092.9	26892.3					0.00436751	0.0061633					34.6971	34.2235					0.998368	0.992368					8.51498	7.14885
Q8GXN9	AT5G23080	G patch domain-containing protein TGH	1.12402e-42	0.950147	104934	MGSDEEDFVFHGTPIER	TRUE	_[Acetyl (Protein N-term)]M[Oxidation]GS[Phospho]DEEDFVFHGTPIER_.2	_[Acetyl (Protein N-term)]M[Oxidation]GS[Phospho]DEEDFVFHGTPIER_	_[+84]M[+16]GS[+80]DEEDFVFHGTPIER_	FALSE	1	1					0.00124586	0.00135745					90.8376	91.1326					0.949265	0.994139					11.9883	9.25149
Q8GXW8	At1g04780	Ankyrin repeat family protein	6.73505e-25	0.91594	74359.8	TPSQRPSTSSSSGGFNIGK	TRUE	_TPS[Phospho]QRPSTSSSSGGFNIGK_.3	_TPS[Phospho]QRPSTSSSSGGFNIGK_	_TPS[+80]QRPSTSSSSGGFNIGK_	FALSE	1.44349e+06	1.24182e+06	812172				8.1999e-12	3.10392e-22	1.14268e-14				52.1034	52.4839	52.4481				0.772351	0.954444	0.837411				14.5987	13.5846	10.8912
Q8GXW8	At1g04780	Ankyrin repeat family protein	6.73505e-25	0.91594	74359.8	HSTVETVVR	TRUE	_HS[Phospho]TVETVVR_.2	_HS[Phospho]TVETVVR_	_HS[+80]TVETVVR_	FALSE	171483	153115					0.000487709	0.00223957					42.1175	42.2333					0.869114	0.964559					3.58629	4.99696
Q8GYQ9	AT1G79020	Enhancer of polycomb-like protein	0.00018895	0.835896	52398.3	FGSSDDELMDSDDHTSTR	TRUE	_FGS[Phospho]S[Phospho]DDELMDSDDHTSTR_.3	_FGS[Phospho]S[Phospho]DDELMDSDDHTSTR_	_FGS[+80]S[+80]DDELMDSDDHTSTR_	FALSE	27615.8	48418.4					0.00975302	0.00550826					66.4107	66.599					0.98943	0.817334					13.6021	10.5499
Q8H104	AT4G26870	Aspartate--tRNA ligase 1, cytoplasmic;Aspartate--tRNA ligase 2, cytoplasmic	0.0122989	0.704598	60333.1	AEDSFTHR	TRUE	_AEDS[Phospho]FTHR_.2	_AEDS[Phospho]FTHR_	_AEDS[+80]FTHR_	FALSE	17211.8		30420.6				0.00332821		0.00266275				35.8149		34.5614				0.841327		0.915906				2.66813		3.38798
Q8H1G0	AT1G51600	GATA transcription factor 28	8.785e-09	0.872042	33129.8	ASPQTAQNLPLNK	TRUE	_AS[Phospho]PQTAQNLPLNK_.2	_AS[Phospho]PQTAQNLPLNK_	_AS[+80]PQTAQNLPLNK_	FALSE		128528	426595					0.00197108	0.000278845					51.0357	51.0142					0.871173	0.914871					2.91137	3.37461
Q8L6X7	At4g22290	At4g22290	1.85699e-22	0.91023	47536.7	KSGELGR	TRUE	_KS[Phospho]GELGR_.2	_KS[Phospho]GELGR_	_KS[+80]GELGR_	FALSE		14677.5	2364.29					0.0067936	0.00468695					33.315	32.8872					1	1
Q8L7M3	AT5G23590	At5g23590	0.000690716	0.788566	33490.2	SGFQTPESNVDEK	TRUE	_SGFQT[Phospho]PESNVDEK_.2	_SGFQT[Phospho]PESNVDEK_	_SGFQT[+80]PESNVDEK_	FALSE		501478	554301					0.000727395	4.74105e-08					45.7378	45.725					0.997727	0.982584					7.77738	5.72595
Q8L862	At4g35140	Transducin/WD40 repeat-like superfamily protein	0.000410941	0.799742	55492	EGESSSATGR	TRUE	_EGESSS[Phospho]ATGR_.2	_EGESSS[Phospho]ATGR_	_EGESSS[+80]ATGR_	FALSE	64678.5	81785.5					0.000206397	0.000426573					13.3519	13.6204					0.904299	0.922284					4.49326	5.67917
Q8L8Q8	AT5G64816	Uncharacterized protein At5g64816	0.000282976	0.818924	14441.6	LSSSSSSSR	TRUE	_LSSS[Phospho]SSSSR_.2	_LSSS[Phospho]SSSSR_	_LSSS[+80]SSSSR_	FALSE		147401	184212					2.79461e-09	1.72504e-10					14.6696	14.3689					0.940778	0.973791					11.8401	14.4679
Q8L9W8	At5g24890	At5g24890	2.77727e-22	0.909808	26576.5	SMPLLPVNEDEDDDDEDDDEEDLK	TRUE	_S[Phospho]M[Oxidation]PLLPVNEDEDDDDEDDDEEDLK_.3	_S[Phospho]M[Oxidation]PLLPVNEDEDDDDEDDDEEDLK_	_S[+80]M[+16]PLLPVNEDEDDDDEDDDEEDLK_	FALSE	645844	875327	751361				0.00562546	0.0076592	0.00110844				77.7318	77.7618	77.6258				1	1	1
Q8LBW2	AT5G04250	OVARIAN TUMOR DOMAIN-containing deubiquitinating enzyme 9	2.25929e-07	0.865813	39231.4	FEGGQSSPSR	TRUE	_FEGGQSS[Phospho]PSR_.2	_FEGGQSS[Phospho]PSR_	_FEGGQSS[+80]PSR_	FALSE	317065	435285					4.09147e-17	2.20343e-10					26.3375	26.1917					0.95655	0.773665					8.90484	11.3399
Q8LCF4	AT3G48450	At3g48450	0.00043398	0.798393	10110.3	TAVAGPESIVSPPR	TRUE	_TAVAGPESIVS[Phospho]PPR_.2	_TAVAGPESIVS[Phospho]PPR_	_TAVAGPESIVS[+80]PPR_	FALSE	526486	348801	215097				0.00251397	0.000965499	5.99629e-10				66.1353	66.4005	66.2125				0.896758	0.814644	0.994621				12.0375	7.12637	11.8048
Q8LFI5	AT4G04630	Uncharacterized protein	0.000134743	0.841052	18755.7	QSSAPMNVPDWSK	TRUE	_QSS[Phospho]APM[Oxidation]NVPDWSK_.2	_QSS[Phospho]APM[Oxidation]NVPDWSK_	_QSS[+80]APM[+16]NVPDWSK_	FALSE	59667.4		145587				0.000222377		3.14686e-09				57.3451		57.3645				0.928354		0.912803				17.3425		12.8505
Q8LG95	AT4G21190	Pentatricopeptide repeat-containing protein At4g21190	0.00108619	0.778278	35480.9	IDNEIESEEEDGEDLSEEEEDEK	TRUE	_IDNEIES[Phospho]EEEDGEDLS[Phospho]EEEEDEK_.3	_IDNEIES[Phospho]EEEDGEDLS[Phospho]EEEEDEK_	_IDNEIES[+80]EEEDGEDLS[+80]EEEEDEK_	FALSE		123442	242158					0.000151938	0.00167589					67.2636	67.508					1	1
Q8RWF9	AT2G21500	At2g21560	6.17957e-19	0.901452	46685.2	IASIDSVSEQITQK	TRUE	_IAS[Phospho]IDSVSEQITQK_.2	_IAS[Phospho]IDSVSEQITQK_	_IAS[+80]IDSVSEQITQK_	FALSE	169477		101070				0.00219355		0.00784481				75.4387		75.8274				0.996978		0.995969				8.34141		7.60824
Q8RWL6	AT4G35780	Serine/threonine-protein kinase STY17	9.90735e-17	0.895808	64696.4	AVVASITKESPR	TRUE	_AVVASITKES[Phospho]PR_.2	_AVVASITKES[Phospho]PR_	_AVVASITKES[+80]PR_	FALSE	510492	395999					0.00257724	0.00319513					47.5929	48.493					0.98262	0.920387					13.7176	7.43793
Q8RWV3	AT2G26430	Cyclin-L1-1	1.17478e-09	0.875336	47555.4	SGTESNSQPIVGDSSYER	TRUE	_S[Phospho]GTESNSQPIVGDSSYER_.2	_S[Phospho]GTESNSQPIVGDSSYER_	_S[+80]GTESNSQPIVGDSSYER_	FALSE	105647	86212.1					0.00076997	0.00171282					52.6541	52.5741					0.786573	0.871155					5.27392	6.67208
Q8RWY7	AT4G32420	Peptidyl-prolyl cis-trans isomerase CYP95	2.38411e-15	0.892242	94630.4	EAESLHQGK	TRUE	_EAES[Phospho]LHQGK_.2	_EAES[Phospho]LHQGK_	_EAES[+80]LHQGK_	FALSE		75301.1	36692.3					0.00148908	0.00848122					25.479	25.1521					1	1
Q8RX56	AT5G06970	Protein unc-13 homolog	4.07154e-08	0.86927	124523	SESFDSPK	TRUE	_SESFDS[Phospho]PK_.2	_SESFDS[Phospho]PK_	_SESFDS[+80]PK_	FALSE		227330	292512					0.00185364	2.94976e-10					34.3059	33.8319					0.99963	0.957703					9.59571	5.37628
Q8RX85	AT3G17750	AT3g17750/MIG5_4	3.28196e-25	0.916673	127239	GTEHGSVPDTQDK	TRUE	_GTEHGS[Phospho]VPDTQDK_.2	_GTEHGS[Phospho]VPDTQDK_	_GTEHGS[+80]VPDTQDK_	FALSE	100083	78477.3					0.000122837	0.000328879					30.7051	30.3313					0.810618	0.895856					6.90339	4.45059
Q8RXN0	AT1G17840	ABC transporter G family member 11	2.13495e-15	0.892367	78412.5	NGTQNTTVAPDGLTQSPSLR	TRUE	_NGTQNTTVAPDGLTQS[Phospho]PSLR_.2	_NGTQNTTVAPDGLTQS[Phospho]PSLR_	_NGTQNTTVAPDGLTQS[+80]PSLR_	FALSE	361983		682790				0.00129909		0.00565417				62.1513		64.4405				0.870349		0.777118				22.2314		17.587
Q8RXR2	AT1G55620	Chloride channel protein CLC-f	0.00228634	0.759782	83548.5	RFSLSGR	TRUE	_RFS[Phospho]LSGR_.2	_RFS[Phospho]LSGR_	_RFS[+80]LSGR_	FALSE	38250	638308					0.00187884	0.00232116					55.5114	58.5028					0.816274	0.860598					2.49131	2.82027
Q8S8L9	AT2G32450	Uncharacterized TPR repeat-containing protein At2g32450	4.11949e-15	0.891617	90228.6	ELGPSSDISDKR	TRUE	_ELGPSS[Phospho]DIS[Phospho]DKR_.2	_ELGPSS[Phospho]DIS[Phospho]DKR_	_ELGPSS[+80]DIS[+80]DKR_	FALSE	150414		205311				0.000106727		0.001506				43.0687		43.1381				0.991439		0.77615				5.7433		1.90312
Q8VYJ6	AT2G30880	At2g30880/F7F1.9	5.19634e-21	0.906666	56023.2	NSLDIPVVSPEPNVPR	TRUE	_NSLDIPVVS[Phospho]PEPNVPR_.2	_NSLDIPVVS[Phospho]PEPNVPR_	_NSLDIPVVS[+80]PEPNVPR_	FALSE		3.92674e+06	473702					0.00195371	0.00359212					84.071	83.7567					0.835819	0.977476					2.62744	4.77039
Q8VZ95	AT3G60600	Vesicle-associated protein 1-1	3.15158e-17	0.897074	28472.6	VTYVAPPRPPSPVHEGSEEGSSPR	TRUE	_VTYVAPPRPPS[Phospho]PVHEGSEEGSSPR_.3	_VTYVAPPRPPS[Phospho]PVHEGSEEGSSPR_	_VTYVAPPRPPS[+80]PVHEGSEEGSSPR_	FALSE	5.44174e+06	4533914					0.00220273	0.000465768					64.4055	65.5323					0.998118	0.999867					28.4229	27.0139
Q8VZT4	AT1G29370	RNA polymerase II degradation factor-like protein (DUF1296)	1.59739e-12	0.884535	90888.2	PLAPSTSSLSVAPAESEVR	TRUE	_PLAPSTS[Phospho]SLSVAPAESEVR_.2	_PLAPSTS[Phospho]SLSVAPAESEVR_	_PLAPSTS[+80]SLSVAPAESEVR_	FALSE		582447	414526					1.04301e-16	6.53756e-22					76.7514	76.7012					0.896015	0.805544					13.4257	12.8711
Q93VP3	AT1G26630	Eukaryotic translation initiation factor 5A-2	4.37459e-23	0.911725	17140.2	SDDEHHFEASESGASK	TRUE	_[Acetyl (Protein N-term)]S[Phospho]DDEHHFEAS[Phospho]ESGASK_.2	_[Acetyl (Protein N-term)]S[Phospho]DDEHHFEAS[Phospho]ESGASK_	_[+84]S[+80]DDEHHFEAS[+80]ESGASK_	FALSE	2752.43		1.15532				0.00178536		0.00217514				44.8393		45.9878				0.771966		0.980407				7.65196		8.47817
Q93YP9	AT1G19450	Sugar transporter ERD6-like 4	1.61501e-16	0.895264	52787.1	QSSMLESSQVIR	TRUE	_QSS[Phospho]M[Oxidation]LESS[Phospho]QVIR_.2	_QSS[Phospho]M[Oxidation]LESS[Phospho]QVIR_	_QSS[+80]M[+16]LESS[+80]QVIR_	FALSE	46001	78063.6					0.00372132	0.00433065					54.1748	53.6502					0.941772	0.899249					19.3403	27.2611
Q93YP9	At1g19450	Sugar transporter ERD6-like 4	1.61501e-16	0.895264	52787.1	QSSMLESSQVIR	TRUE	_QSS[Phospho]M[Oxidation]LESSQVIR_.2	_QSS[Phospho]M[Oxidation]LESSQVIR_	_QSS[+80]M[+16]LESSQVIR_	FALSE	123502	130277	144993				0.00204815	0.000988757	0.000766447				50.0265	50.1758	50.1998				0.94027	0.89701	0.920792				12.1328	10.7001	12.7467
Q93ZH1	AT1G27210	TORTIFOLIA1-like protein 4	2.32456e-21	0.907546	67542	SPSLPVNR	TRUE	_S[Phospho]PSLPVNR_.2	_S[Phospho]PSLPVNR_	_S[+80]PSLPVNR_	FALSE	2.51299e+06		2844166				4.87297e-43		8.36728e-37				46.5032		46.3151				0.998934		0.913248				7.84259		7.20667
Q940N7	AT4G05150	AT4g05150/C17L7_70	6.65895e-34	0.934631	53062.2	ASSISSLLDSSVNR	TRUE	_ASS[Phospho]IS[Phospho]S[Phospho]LLDSSVNR_.2	_ASS[Phospho]IS[Phospho]S[Phospho]LLDSSVNR_	_ASS[+80]IS[+80]S[+80]LLDSSVNR_	FALSE		305731	249178					0.00102394	0.000662692					98.4464	98.482					0.788523	0.818578					12.3422	9.52408
Q94A79	AT3G49250	Protein DEFECTIVE IN MERISTEM SILENCING 3	0.000248062	0.827883	46767.2	LNSSPTPR	TRUE	_LNSS[Phospho]PTPR_.2	_LNSS[Phospho]PTPR_	_LNSS[+80]PTPR_	FALSE	183011	268138					9.24575e-06	8.10265e-05					24.9545	25.0248					0.825156	0.959581					12.8368	12.5122
Q94B71	AT1G14740	Protein OBERON 3	0.000214842	0.832824	82389.2	PGNEVTISGDSR	TRUE	_PGNEVTIS[Phospho]GDSR_.2	_PGNEVTIS[Phospho]GDSR_	_PGNEVTIS[+80]GDSR_	FALSE	431563	556812	557105				4.97472e-15	1.29715e-05	3.32903e-12				40.5991	40.5767	40.1722				0.919977	0.933848	0.954959				9.8885	8.83241	9.99883
Q94BR1	AT5G63190	MA3 DOMAIN-CONTAINING TRANSLATION REGULATORY FACTOR 1	1.69003e-14	0.889999	77556.2	NDPNYDSGEDAYDGLVDSPVSDPLNDYK	TRUE	_NDPNYDSGEDAY[Phospho]DGLVDSPVSDPLNDYK_.3	_NDPNYDSGEDAY[Phospho]DGLVDSPVSDPLNDYK_	_NDPNYDSGEDAY[+80]DGLVDSPVSDPLNDYK_	FALSE	16958700		16223492				9.16666e-38		3.06772e-28				100.382		100.45				0.79032		0.978738				36.7491		26.146
Q9C562	AT5G58380	CBL-interacting serine/threonine-protein kinase 10	1.08469e-19	0.903354	54589.3	QDGLLHTTCGTPAYVAPEVINR	TRUE	_QDGLLHTTC[Carbamidomethyl]GT[Phospho]PAYVAPEVINR_.3	_QDGLLHTTC[Carbamidomethyl]GT[Phospho]PAYVAPEVINR_	_QDGLLHTTC[+57]GT[+80]PAYVAPEVINR_	FALSE		3.30558e+06	2.41404e+06					2.75023e-26	9.0986e-30					83.7224	83.889					0.959003	0.94673					12.9584	11.4797
Q9C690	AT1G51140	Transcription factor bHLH122	6.43475e-18	0.898832	41716.4	SLSDIEQLLSDSIPCK	TRUE	_SLS[Phospho]DIEQLLSDSIPC[Carbamidomethyl]K_.2	_SLS[Phospho]DIEQLLSDSIPC[Carbamidomethyl]K_	_SLS[+80]DIEQLLSDSIPC[+57]K_	FALSE	579774		313443				5.1242e-11		1.34631e-18				115.26		115.317				0.806613		0.990496				17.8462		46.419
Q9C6L8	AT1G25480	Aluminum-activated malate transporter 4	0.000283393	0.818675	61719.6	ACSDFGFNDSNIIDDR	TRUE	_AC[Carbamidomethyl]S[Phospho]DFGFNDS[Phospho]NIIDDR_.2	_AC[Carbamidomethyl]S[Phospho]DFGFNDS[Phospho]NIIDDR_	_AC[+57]S[+80]DFGFNDS[+80]NIIDDR_	FALSE	235031	270196	253264				0.00700921	2.09372e-10	0.00474852				96.3264	96.2664	95.9439				1	1	1
Q9C6N3	AT1G27850	RUN/FYVE domain protein	1.12675e-25	0.91774	124853	GTSPVSSSR	TRUE	_GTSPVSSS[Phospho]R_.2	_GTSPVSSS[Phospho]R_	_GTSPVSSS[+80]R_	FALSE	145292	281445					0.00682113	0.000564692					23.0749	23.1585					0.790348	0.867186					4.77896	8.77402
Q9C7W4	AT1G64400	Long chain acyl-CoA synthetase 3	0.0240876	0.674666	74751.1	VSGDFESICR	TRUE	_VS[Phospho]GDFESIC[Carbamidomethyl]R_.2	_VS[Phospho]GDFESIC[Carbamidomethyl]R_	_VS[+80]GDFESIC[+57]R_	FALSE		208324	147636					0.00627187	0.00490813					60.5239	60.1864					0.928924	0.755452					3.57028	2.1279
Q9C7Y9	AT1G47970	At1g47970	1.99403e-14	0.889801	21847	AEDEEDASDFEPEENGVEEDIDEGEDDENDNSGGAGK	TRUE	_AEDEEDAS[Phospho]DFEPEENGVEEDIDEGEDDENDNSGGAGK_.4	_AEDEEDAS[Phospho]DFEPEENGVEEDIDEGEDDENDNSGGAGK_	_AEDEEDAS[+80]DFEPEENGVEEDIDEGEDDENDNSGGAGK_	FALSE		152341	96480.4					0.00977136	0.00784392					84.6688	84.5264					0.9906	0.999336					5.6576	8.31693
Q9C8K2	AT1G51500	ABC transporter G family member 12	4.35524e-21	0.906857	76450.7	VPSLSSLSSR	TRUE	_VPS[Phospho]LSSLS[Phospho]SR_.2	_VPS[Phospho]LSSLS[Phospho]SR_	_VPS[+80]LSSLS[+80]SR_	FALSE	2.75337e+06	2.42044e+06					5.11163e-15	4.9707e-12					68.1727	68.2524					0.804259	0.791113					30.5564	31.1261
Q9C8W5	At1g71970	At1g71970/F17M19_12	8.574e-13	0.885305	24615.5	NISFPATGK	TRUE	_NIS[Phospho]FPATGK_.2	_NIS[Phospho]FPATGK_	_NIS[+80]FPATGK_	FALSE	535529	439976					9.23072e-06	3.96954e-13					60.3533	60.5093					0.994438	0.995962					6.18619	10.5824
Q9C977	AT1G80270	Pentatricopeptide repeat-containing protein At1g80270, mitochondrial	1.1535e-19	0.903287	67282.1	SDQEEDDLEDGFSELEGSK	TRUE	_SDQEEDDLEDGFS[Phospho]ELEGSK_.2	_SDQEEDDLEDGFS[Phospho]ELEGSK_	_SDQEEDDLEDGFS[+80]ELEGSK_	FALSE	424167		1				0.000158275		1.30085e-07				90.7627		97.4663				0.966103		0.999784				7.33004		16.1543
Q9C9A5	AT1G71030	At1g71030/F23N20_2	0.0228154	0.677177	22098.1	ALSPPSGMQHR	TRUE	_ALS[Phospho]PPSGMQHR_.2	_ALS[Phospho]PPSGMQHR_	_ALS[+80]PPSGMQHR_	FALSE		12930.5	14138.4					0.0056087	0.00464525					48.5518	48.3953					0.93338	0.751642					3.63982	2.10739
Q9C9Y8	AT3G08680	Probable inactive receptor kinase At3g08680	3.72744e-27	0.921023	69406.4	EEWTGEVFDVELIK	TRUE	_EEWT[Phospho]GEVFDVELIK_.2	_EEWT[Phospho]GEVFDVELIK_	_EEWT[+80]GEVFDVELIK_	FALSE	567528	73061.2					0.000926312	0.00269951					112.703	113.545					1	1
Q9CA42	AT1G68790	Protein CROWDED NUCLEI 3	1.5038e-13	0.887424	127204	EQTSRITESEQAAGDSDEGVDSITTGGR	TRUE	_EQTSRIT[Phospho]ES[Phospho]EQAAGDS[Phospho]DEGVDSITTGGR_.3	_EQTSRIT[Phospho]ES[Phospho]EQAAGDS[Phospho]DEGVDSITTGGR_	_EQTSRIT[+80]ES[+80]EQAAGDS[+80]DEGVDSITTGGR_	FALSE	1.24051e+06	1107700					2.22099e-08	2.9121e-07					64.4957	64.2699					0.944444	0.945449					45.3978	47.1575
Q9FFS0	AT5G41600	Reticulon-like protein B4	4.7555e-07	0.864165	28948.8	IHGHGDSSSLSDSDDDK	TRUE	_IHGHGDSSSLS[Phospho]DS[Phospho]DDDK_.3	_IHGHGDSSSLS[Phospho]DS[Phospho]DDDK_	_IHGHGDSSSLS[+80]DS[+80]DDDK_	FALSE	336904	442695					0.00151979	5.88231e-05					36.2503	35.9025					0.793712	0.997124					8.15517	9.62391
Q9FG14	AT5G06560	Myosin-binding protein 7	3.31713e-30	0.927385	59426.7	VSTGSASSLLGTTR	TRUE	_VST[Phospho]GSASSLLGTTR_.2	_VST[Phospho]GSASSLLGTTR_	_VST[+80]GSASSLLGTTR_	FALSE	111864	70738.6	105045				0.000166384	1.10276e-05	1.28021e-05				61.7503	62.1847	62.176				0.878816	0.808092	0.827868				13.9224	11.1293	7.43389
Q9FGG4	AT5G64690	At5g64690	1.36654e-20	0.905617	38144.3	NENIISPNAAEEAAAAAR	TRUE	_NENIIS[Phospho]PNAAEEAAAAAR_.2	_NENIIS[Phospho]PNAAEEAAAAAR_	_NENIIS[+80]PNAAEEAAAAAR_	FALSE		163218	332264					0.000769695	2.50929e-05					81.0783	81.1334					1	1
Q9FHD7	AT5G41260	Serine/threonine-protein kinase BSK8	2.0657e-22	0.910115	54625	EFSIETIR	TRUE	_EFS[Phospho]IETIR_.2	_EFS[Phospho]IETIR_	_EFS[+80]IETIR_	FALSE	877914	24991.2					0.00508398	0.00765893					83.6339	80.2591					0.933443	0.979529					3.64081	4.86805
Q9FIU5	AT5G54590	Calcium/calmodulin-regulated receptor-like kinase 1	0.00703319	0.726069	48970.1	SATIPIR	TRUE	_S[Phospho]ATIPIR_.2	_S[Phospho]ATIPIR_	_S[+80]ATIPIR_	FALSE	1		5436.31				0.00684968		0.00370981				48.3514		48.3042				0.762536		0.802171				3.20413		2.39992
Q9FJY5	AT5G66540	U3 small nucleolar ribonucleoprotein protein MPP10	7.54101e-15	0.890929	59744.8	LKDLSEDEEAEIENK	TRUE	_LKDLS[Phospho]EDEEAEIENK_.3	_LKDLS[Phospho]EDEEAEIENK_	_LKDLS[+80]EDEEAEIENK_	FALSE		141046	196964					0.00375678	0.000841536					66.5609	67.3923					1	1
Q9FKL6	AT5G57580	Calmodulin-binding protein 60 B	1.90684e-09	0.874572	72364.1	LTGSSGSSPK	TRUE	_LTGS[Phospho]SGSS[Phospho]PK_.2	_LTGS[Phospho]SGSS[Phospho]PK_	_LTGS[+80]SGSS[+80]PK_	FALSE	117135	123156					7.42584e-06	4.76249e-08					15.6863	15.7271					0.76422	0.866342					12.142	17.1599
Q9FNM7	AT5G08610	DEAD-box ATP-dependent RNA helicase 26	7.0198e-26	0.918212	94186	GLSLEEEDSSDDDENR	TRUE	_GLSLEEEDSS[Phospho]DDDENR_.2	_GLSLEEEDSS[Phospho]DDDENR_	_GLSLEEEDSS[+80]DDDENR_	FALSE		3.27224e+06	3326391					5.99534e-18	2.13782e-25					54.5683	54.5037					0.974907	0.886592					19.6448	17.1386
Q9FVQ1	AT1G48920	Nucleolin 1	5.88868e-22	0.909012	58773.4	TPSTPAAGGSK	TRUE	_TPS[Phospho]T[Phospho]PAAGGSK_.2	_TPS[Phospho]T[Phospho]PAAGGSK_	_TPS[+80]T[+80]PAAGGSK_	FALSE	67324.5		128287				0.00151736		6.01143e-08				15.6793		15.7011				0.895582		0.924381				11.1647		13.3247
Q9FVW4	AT1G33980	Regulator of nonsense transcripts UPF3	6.84173e-05	0.846836	53804	NDSRPSQSSTFVQSEQR	TRUE	_NDSRPSQSST[Phospho]FVQSEQR_.3	_NDSRPSQSST[Phospho]FVQSEQR_	_NDSRPSQSST[+80]FVQSEQR_	FALSE		838344	826949					0.000591345	0.000480567					46.3154	46.3089					0.869203	0.95397					11.0358	14.409
Q9FYG2	AT1G67310	Calmodulin-binding transcription activator 4	1.49722e-10	0.878428	113064	VLSMSNSPEAR	TRUE	_VLS[Phospho]M[Oxidation]SNSPEAR_.2	_VLS[Phospho]M[Oxidation]SNSPEAR_	_VLS[+80]M[+16]SNSPEAR_	FALSE		92788.1	316167					0.000439862	0.00369698					38.485	38.6022					0.849083	0.997032					15.8623	11.5285
Q9LD90	AT3G57150	H/ACA ribonucleoprotein complex subunit 4	1.76218e-32	0.931897	63026.3	HDDSSDSPAPVTTK	TRUE	_HDDSS[Phospho]DS[Phospho]PAPVTTK_.2	_HDDSS[Phospho]DS[Phospho]PAPVTTK_	_HDDSS[+80]DS[+80]PAPVTTK_	FALSE	178572	76634.1					2.36439e-13	0.000701012					28.1685	28.1229					0.923741	0.776918					12.0049	12.1222
Q9LDN6	AT3G15220	MAP kinase	4.93187e-19	0.901694	76318.2	EFSSNTNVSPLGR	TRUE	_EFSS[Phospho]NTNVSPLGR_.2	_EFSS[Phospho]NTNVSPLGR_	_EFSS[+80]NTNVSPLGR_	FALSE	1.0109e+06		1.04141e+06				2.00651e-37		9.77869e-14				62.2006		62.6427				0.87485		0.916665				14.7496		11.8612
Q9LE22	AT1G18210	Probable calcium-binding protein CML27	3.79921e-15	0.89171	18350.2	VLEEVDTDR	TRUE	_VLEEVDT[Phospho]DR_.2	_VLEEVDT[Phospho]DR_	_VLEEVDT[+80]DR_	FALSE		92549.5	118107					0.00748775	0.00424805					36.5643	41.0026					1	1
Q9LET1	AT3G56760	CDPK-related kinase 7	1.72628e-29	0.925911	64547.3	SESGIFR	TRUE	_S[Phospho]ESGIFR_.2	_S[Phospho]ESGIFR_	_S[+80]ESGIFR_	FALSE	944485		904823				2.8248e-06		6.82339e-11				54.2357		54.1762				0.995292		0.962091				13.3666		5.13206
Q9LEU5	AT5G10950	Tudor/PWWP/MBT superfamily protein	3.25947e-21	0.907174	43620.5	LSNSNSDNGENNSSDDEKEITISK	TRUE	_LSNS[Phospho]NS[Phospho]DNGENNS[Phospho]S[Phospho]DDEKEITISK_.3	_LSNS[Phospho]NS[Phospho]DNGENNS[Phospho]S[Phospho]DDEKEITISK_	_LSNS[+80]NS[+80]DNGENNS[+80]S[+80]DDEKEITISK_	FALSE	642861	586108	567728				0.00172169	0.00172939	0.00170186				58.0094	57.3778	57.7438				0.822007	0.980838	0.996867				16.3923	16.7629	19.0781
Q9LFE4	AT5G16730	WEB family protein At5g16730, chloroplastic	7.52868e-12	0.882541	96208	SELESQEEEEDSSK	TRUE	_SELES[Phospho]QEEEEDS[Phospho]SK_.2	_SELES[Phospho]QEEEEDS[Phospho]SK_	_SELES[+80]QEEEEDS[+80]SK_	FALSE	36034.9		53749				0.00987796		0.00197158				36.1338		36.0385				0.782878		0.877767				11.844		16.6618
Q9LIR6	AT3G23920	Beta-amylase 1, chloroplastic	1.18346e-37	0.9414	63762.2	SGEMTDSSLLSISPPSAR	TRUE	_SGEM[Oxidation]TDSSLLSIS[Phospho]PPSAR_.2	_SGEM[Oxidation]TDSSLLSIS[Phospho]PPSAR_	_SGEM[+16]TDSSLLSIS[+80]PPSAR_	FALSE		662862	45980					7.24273e-08	1.15331e-30					78.4711	85.3445					0.801668	0.807686					23.4998	26.8346
Q9LKA4	AT3G15010	UBP1-associated protein 2C	0.0205285	0.682208	41779.9	LSPQDAR	TRUE	_LS[Phospho]PQDAR_.2	_LS[Phospho]PQDAR_	_LS[+80]PQDAR_	FALSE	164586	87215.4					0.0085299	0.00368313					31.3576	31.1533					1	1
Q9LM78	AT1G20760	Calcium-binding EF hand family protein	3.69879e-22	0.909508	109818	SQFAFDDSVPSTPLSR	TRUE	_SQFAFDDSVPS[Phospho]T[Phospho]PLSR_.2	_SQFAFDDSVPS[Phospho]T[Phospho]PLSR_	_SQFAFDDSVPS[+80]T[+80]PLSR_	FALSE		1.76019e+06	805884					0.00289582	9.82237e-18					85.8106	85.5151					0.832657	0.787713					13.5774	27.2105
Q9LMJ4	AT1G07000	Exocyst complex component EXO70B2	1.55342e-07	0.866615	67714.8	APDSFDSDDEFPGEEDNDTSDGVIVAR	TRUE	_APDSFDS[Phospho]DDEFPGEEDNDTSDGVIVAR_.3	_APDSFDS[Phospho]DDEFPGEEDNDTSDGVIVAR_	_APDSFDS[+80]DDEFPGEEDNDTSDGVIVAR_	FALSE	3.60433e+06	3.40569e+06	2.9464e+06				5.74895e-29	5.363e-19	4.45046e-31				85.5642	86.0127	85.8098				0.88223	0.848227	0.849311				19.2686	23.6964	16.0734
Q9LMM6	AT1G01550	Protein BPS1, chloroplastic	0.00107289	0.778591	38583.6	SMGASTLQATSPK	TRUE	_SM[Oxidation]GASTLQATS[Phospho]PK_.2	_SM[Oxidation]GASTLQATS[Phospho]PK_	_SM[+16]GASTLQATS[+80]PK_	FALSE		165538	282929					0.000147559	0.00450988					34.5214	34.0477					0.985727	0.998848					25.6445	34.0247
Q9LMP7	AT1G15880	Golgi SNAP receptor complex member 1-1	0.000292709	0.814887	25213.7	LDLEDGYGSEQALIK	TRUE	_LDLEDGYGS[Phospho]EQALIK_.2	_LDLEDGYGS[Phospho]EQALIK_	_LDLEDGYGS[+80]EQALIK_	FALSE	513395	388099	276261				5.37907e-06	1.06811e-09	0.000843358				85.243	85.8153	85.7822				0.98419	0.848318	0.897704				5.13118	2.72147	3.17197
Q9LNC4	AT1G06230	Transcription factor GTE4	0.000795416	0.785538	84094.6	NPIEAPSQTLSLEDGDTLVVDK	TRUE	_NPIEAPSQTLS[Phospho]LEDGDTLVVDK_.3	_NPIEAPSQTLS[Phospho]LEDGDTLVVDK_	_NPIEAPSQTLS[+80]LEDGDTLVVDK_	FALSE	371562	244253					5.7616e-06	0.000523167					90.3442	90.6236					0.843604	0.768442					8.11423	6.54044
Q9LNU4	AT1G20200	26S proteasome non-ATPase regulatory subunit 3 homolog A	1.7416e-19	0.902842	55582.3	DNNTPSQSIISSSTSTMQNLK	TRUE	_DNNT[Phospho]PS[Phospho]QSIISSSTSTMQNLK_.3	_DNNT[Phospho]PS[Phospho]QSIISSSTSTMQNLK_	_DNNT[+80]PS[+80]QSIISSSTSTMQNLK_	FALSE	544171	627147					4.8774e-13	1.50536e-09					85.9249	85.9559					0.772053	0.996449					25.9037	28.5169
Q9LUK6	AT5G46840	At5g46840	0.0002548	0.826618	56497.1	KLTDSGDEK	TRUE	_KLTDS[Phospho]GDEK_.2	_KLTDS[Phospho]GDEK_	_KLTDS[+80]GDEK_	FALSE	233485	270797					1.29496e-07	8.13288e-05					25.6707	25.4944					0.994255	0.999988					9.82491	14.8568
Q9LXC9	AT5G09650	Soluble inorganic pyrophosphatase 6, chloroplastic	0.0100414	0.712503	33380	VFFLDGSGK	TRUE	_VFFLDGS[Phospho]GK_.2	_VFFLDGS[Phospho]GK_	_VFFLDGS[+80]GK_	FALSE	16883.1	16616.6	4218.31				0.00411975	0.00191213	0.00427848				84.0592	84.6012	84.4587				1	1	1
Q9LXJ3	AT3G52710	Uncharacterized protein At3g52710	1.23812e-09	0.875253	31694	RDVVVSPPR	TRUE	_RDVVVS[Phospho]PPR_.2	_RDVVVS[Phospho]PPR_	_RDVVVS[+80]PPR_	FALSE		800386	751839					0.003719	0.00335361					50.5467	51.8613					1	1
Q9M9T4	AT1G14280	Protein PHYTOCHROME KINASE SUBSTRATE 2	3.15122e-38	0.942411	49130.9	NSSCNSYFQEK	TRUE	_NSS[Phospho]C[Carbamidomethyl]NSYFQEK_.2	_NSS[Phospho]C[Carbamidomethyl]NSYFQEK_	_NSS[+80]C[+57]NSYFQEK_	FALSE	400363	381632	421691				2.79439e-12	0.00114016	2.52741e-17				49.3192	49.453	49.2601				0.804331	0.76069	0.971563				10.5087	7.78926	9.80115
Q9S713	AT1G68830	Serine/threonine-protein kinase STN7, chloroplastic	2.87722e-41	0.947814	63252.2	TVTETIDEISDGR	TRUE	_T[Phospho]VTETIDEISDGR_.2	_T[Phospho]VTETIDEISDGR_	_T[+80]VTETIDEISDGR_	FALSE	147497	165125	173771				0.00252429	0.000939579	0.00488683				56.6264	56.7629	56.7589				0.983583	0.986689	0.891832				9.88474	14.7559	15.15
Q9S713	AT1G68830	Serine/threonine-protein kinase STN7, chloroplastic	2.87722e-41	0.947814	63252.2	LVKTVTETIDEISDGR	TRUE	_LVKT[Phospho]VTET[Phospho]IDEISDGR_.2	_LVKT[Phospho]VTET[Phospho]IDEISDGR_	_LVKT[+80]VTET[+80]IDEISDGR_	FALSE	16368834		6216441				9.31029e-39		2.31575e-12				85.3466		87.1856				0.995252		0.999575				39.3182		34.8899
Q9S7Z8	AT1G70940	Auxin efflux carrier component 3	4.29312e-26	0.918688	69466.1	LAPNSTAALQSK	TRUE	_LAPNS[Phospho]TAALQSK_.2	_LAPNS[Phospho]TAALQSK_	_LAPNS[+80]TAALQSK_	FALSE	69358.5		88753.7				0.0002545		0.00029825				43.3499		43.4193				0.909678		0.98868				9.72754		10.6366
Q9S814	AT5G03280	Ethylene-insensitive protein 2	8.11941e-23	0.911088	140956	SLSGEGGSGTGSLSR	TRUE	_S[Phospho]LSGEGGS[Phospho]GTGSLSR_.2	_S[Phospho]LSGEGGS[Phospho]GTGSLSR_	_S[+80]LSGEGGS[+80]GTGSLSR_	FALSE	176209		213984				4.71423e-16		6.0361e-12				43.2711		43.3866				0.950982		0.95				35.4361		29.8318
Q9SA05	AT1G31120	Potassium transporter 10	0.000377279	0.802032	89220	VESSIGGGEIDEEGDER	TRUE	_VES[Phospho]SIGGGEIDEEGDER_.2	_VES[Phospho]SIGGGEIDEEGDER_	_VES[+80]SIGGGEIDEEGDER_	FALSE	553673	122071					3.51483e-05	0.000442988					52.987	52.8457					0.838772	0.772252					2.64912	2.22107
Q9SAD7	AT1G13020	Eukaryotic translation initiation factor 4B2	3.74915e-14	0.889072	59324.5	SESSALNNVENVVK	TRUE	_S[Phospho]ESSALNNVENVVK_.2	_S[Phospho]ESSALNNVENVVK_	_S[+80]ESSALNNVENVVK_	FALSE	392789	353035					0.00293517	0.000555995					77.4887	77.7811					0.959325	0.992044					4.85377	7.41975
Q9SCK9	AT3G49490	Uncharacterized protein T9C5.90	6.63493e-05	0.847041	105345	SLNSMDVDSDSENDQPQK	TRUE	_SLNSM[Oxidation]DVDS[Phospho]DSENDQPQK_.2	_SLNSM[Oxidation]DVDS[Phospho]DSENDQPQK_	_SLNSM[+16]DVDS[+80]DSENDQPQK_	FALSE	88793.6	134588					0.000140497	0.00285442					39.0804	38.8569					0.95425	0.859985					14.3357	18.2556
Q9SCK9	AT3G49490	Uncharacterized protein T9C5.90	6.63493e-05	0.847041	105345	SLTDVGLDLSSR	TRUE	_S[Phospho]LTDVGLDLSSR_.2	_S[Phospho]LTDVGLDLSSR_	_S[+80]LTDVGLDLSSR_	FALSE	36633.2	21852.1					0.00176336	0.00221155					81.1054	81.4871					0.863611	0.832852					15.8709	7.84495
Q9SCK9	AT3G49490	Uncharacterized protein T9C5.90	6.63493e-05	0.847041	105345	SNADDVSTGR	TRUE	_S[Phospho]NADDVS[Phospho]TGR_.2	_S[Phospho]NADDVS[Phospho]TGR_	_S[+80]NADDVS[+80]TGR_	FALSE		195613	280125					1.58672e-08	3.1422e-10					21.332	21.2203					0.974893	0.981981					8.97028	16.0845
Q9SCQ6	AT3G50700	Zinc finger protein GAI-ASSOCIATED FACTOR 1	0.000303734	0.811346	47943.2	NLPGMPDPESEVIALSPK	TRUE	_NLPGM[Oxidation]PDPESEVIALS[Phospho]PK_.2	_NLPGM[Oxidation]PDPESEVIALS[Phospho]PK_	_NLPGM[+16]PDPESEVIALS[+80]PK_	FALSE	396991		8918096				0.00136397		0.000767586				83.0757		73.7423				0.884312		0.999998				9.88496		17.5901
Q9SD79	AT5G08050	Wiskott-aldrich syndrome family protein, putative (DUF1118)	1.68483e-30	0.927964	16580.4	STATPQVK	TRUE	_S[Phospho]TATPQVK_.2	_S[Phospho]TATPQVK_	_S[+80]TATPQVK_	FALSE		232338	288293					0.000201127	2.7933e-05					27.1343	26.8245					0.958201	0.979048					5.19596	7.55086
Q9SHC8	AT2G45140	Vesicle-associated protein 1-2	1.96884e-27	0.921623	26442.2	ASVSDNGNASDFTAAPR	TRUE	_AS[Phospho]VSDNGNASDFTAAPR_.2	_AS[Phospho]VSDNGNASDFTAAPR_	_AS[+80]VSDNGNASDFTAAPR_	FALSE		7.94878e+06	7.30384e+06					4.86006e-24	5.1484e-29					53.5011	53.2508					0.990383	0.987664					54.8528	46.6086
Q9SHJ6	AT1G06530	Peroxisomal and mitochondrial division factor 2	0.000197393	0.834976	36119.3	SLNGEATGQDDESFFDSDQQGDDGK	TRUE	_SLNGEATGQDDESFFDS[Phospho]DQQGDDGK_.3	_SLNGEATGQDDESFFDS[Phospho]DQQGDDGK_	_SLNGEATGQDDESFFDS[+80]DQQGDDGK_	FALSE	552678	634991	652790				0.0010339	2.0209e-05	1.60431e-09				71.6211	71.6881	71.668				0.948231	0.928974	0.809167				12.5462	13.2041	9.39722
Q9SHJ6	AT1G06530	Peroxisomal and mitochondrial division factor 2	0.000197393	0.834976	36119.3	ASELETEVAR	TRUE	_AS[Phospho]ELETEVAR_.2	_AS[Phospho]ELETEVAR_	_AS[+80]ELETEVAR_	FALSE		38034.7	60972.1					0.00396524	0.00475026					47.234	46.9138					0.922686	0.838166					3.47941	2.64464
Q9SJI0	AT2G42760	At2g42760	3.22482e-28	0.923293	30577.7	VPAPAAASEVDLK	TRUE	_VPAPAAAS[Phospho]EVDLK_.2	_VPAPAAAS[Phospho]EVDLK_	_VPAPAAAS[+80]EVDLK_	FALSE	136728	129128	111396				0.000148159	1.63658e-05	3.82656e-22				59.6124	59.8901	59.6587				1	1	1
Q9SMY8	AT4G33210	F-box/LRR-repeat protein 15	2.14206e-07	0.865931	108899	SVSGVSSDAGNSVSSVER	TRUE	_SVS[Phospho]GVSSDAGNSVSSVER_.2	_SVS[Phospho]GVSSDAGNSVSSVER_	_SVS[+80]GVSSDAGNSVSSVER_	FALSE		7069.95	33156.2					4.84635e-08	2.70013e-11					55.3626	55.5132					0.778924	0.761835					14.9985	14.3589
Q9SRH6	AT3G01290	Hypersensitive-induced response protein 3	7.59975e-05	0.846143	31321	YLSGLGIAR	TRUE	_YLS[Phospho]GLGIAR_.2	_YLS[Phospho]GLGIAR_	_YLS[+80]GLGIAR_	FALSE	54685.2	38729.4	31208				0.0036669	0.000214026	0.00511063				82.9001	83.4992	83.1681				0.887406	0.931291	0.860731				3.06452	3.60669	2.82137
Q9SUA1	AT4G26630	DEK domain-containing chromatin associated protein	8.14947e-28	0.922435	85249.4	KTDDDSDTSPK	TRUE	_KTDDDSDTS[Phospho]PK_.2	_KTDDDSDTS[Phospho]PK_	_KTDDDSDTS[+80]PK_	FALSE	472732	571648					1.15947e-14	1.80341e-16					12.1709	12.2292					0.904783	0.903608					16.3759	15.8219
Q9SZB2	AT4G33350	Protein TIC 22, chloroplastic	0.0309964	0.662896	30105.4	SGTPTTTLSPSLVAK	TRUE	_SGT[Phospho]PTTTLSPSLVAK_.2	_SGT[Phospho]PTTTLSPSLVAK_	_SGT[+80]PTTTLSPSLVAK_	FALSE		53334.6	36208.9					0.00643379	0.00864504					67.8348	67.8949					0.97918	0.993623					11.6828	11.7187
Q9SZP8	AT4G38710	Eukaryotic translation initiation factor 4B3	5.34761e-07	0.863897	48987.2	GSFESLSR	TRUE	_GSFES[Phospho]LSR_.2	_GSFES[Phospho]LSR_	_GSFES[+80]LSR_	FALSE	174855	68876.2	178656				0.000278265	0.000201562	4.90988e-08				48.8079	54.4995	48.6701				0.892577	0.941263	0.8186				10.6467	5.66291	8.55163
Q9SZQ2	AT4G29790	AT4g29790/F27B13_30	3.61018e-06	0.858963	133240	SPAASPQMK	TRUE	_S[Phospho]PAAS[Phospho]PQMK_.2	_S[Phospho]PAAS[Phospho]PQMK_	_S[+80]PAAS[+80]PQMK_	FALSE	28012.5	78182.1	72691.1				0.00402546	0.00408649	0.00405175				24.6848	24.6777	24.6412				1	1	1
Q9T024	AT4G39150	AT4g39150/T22F8_50	0.000334167	0.806155	38461.8	ENSLRHEEETGVK	TRUE	_ENS[Phospho]LRHEEETGVK_.3	_ENS[Phospho]LRHEEETGVK_	_ENS[+80]LRHEEETGVK_	FALSE	4.84285e+06	2.25152e+06	1.29927e+06				5.7551e-10	0.000282202	5.08257e-06				50.9623	51.2812	51.8588				0.999599	0.999972	0.998436				8.82124	11.481	7.66107
Q9XID0	AT1G34260	Putative 1-phosphatidylinositol-3-phosphate 5-kinase FAB1D	0.000184175	0.836404	164759	SLSGECSVDGNSCDR	TRUE	_SLSGEC[Carbamidomethyl]SVDGNS[Phospho]C[Carbamidomethyl]DR_.2	_SLSGEC[Carbamidomethyl]SVDGNS[Phospho]C[Carbamidomethyl]DR_	_SLSGEC[+57]SVDGNS[+80]C[+57]DR_	FALSE	43431.8	131691					0.00259887	0.00182153					39.6174	39.4555					0.754655	0.981284					5.86313	6.52401
Q9XIE2	AT1G59870	ABC transporter G family member 36	1.09295e-36	0.939644	165082	NIEDIFSSGSR	TRUE	_NIEDIFS[Phospho]SGS[Phospho]R_.2	_NIEDIFS[Phospho]SGS[Phospho]R_	_NIEDIFS[+80]SGS[+80]R_	FALSE	1.10709e+06	932936					4.52094e-28	7.1846e-16					87.92	87.8131					0.879681	0.919475					8.46037	8.78848
Q9XIE2	AT1G59870	ABC transporter G family member 36	1.09295e-36	0.939644	165082	RTQSVNDDEEALK	TRUE	_RTQS[Phospho]VNDDEEALK_.2	_RTQS[Phospho]VNDDEEALK_	_RTQS[+80]VNDDEEALK_	FALSE		1.00321e+06	904792					0.00055087	9.88216e-08					43.7664	43.536					0.977198	0.876387					4.75783	2.95865
Q9ZNU3	AT2G46630	Putative extensin	3.69641e-27	0.921039	43246.5	VLSPYSLPASLLHSER	TRUE	_VLSPY[Phospho]SLPASLLHSER_.3	_VLSPY[Phospho]SLPASLLHSER_	_VLSPY[+80]SLPASLLHSER_	FALSE	295609		2.6565e+06				0.000485776		3.01317e-05				108.133		110.817				0.979567		0.964819				12.9648		28.5941
Q9ZNU3	AT2G46630	Putative extensin	3.69641e-27	0.921039	43246.5	SPYHSPPSR	TRUE	_SPYHS[Phospho]PPSR_.2	_SPYHS[Phospho]PPSR_	_SPYHS[+80]PPSR_	FALSE		486944	1.02314e+06					0.000818554	7.08662e-16					32.4951	32.0539					0.993144	0.998385					19.6071	22.6931
Q9ZV25	AT2G28890	Probable protein phosphatase 2C 23	3.21374e-19	0.902166	72482.1	SFSHGLANLR	TRUE	_SFS[Phospho]HGLANLR_.2	_SFS[Phospho]HGLANLR_	_SFS[+80]HGLANLR_	FALSE	2.03687e+06	2.02636e+06					0.00173698	0.000107159					71.7851	74.4851					0.976923	0.971939					4.74555	4.54491
Q9ZVA7	AT1G78880	F9K20.7 protein	2.95797e-21	0.907283	50104.4	SSGPQSGGVTR	TRUE	_SS[Phospho]GPQS[Phospho]GGVTR_.2	_SS[Phospho]GPQS[Phospho]GGVTR_	_SS[+80]GPQS[+80]GGVTR_	FALSE	4199409	4.71223e+06	5582492				8.27257e-32	3.76705e-31	1.47518e-31				22.3789	22.1859	22.092				0.977503	0.986707	0.97821				42.0151	36.2271	40.4458

## Sheet: common phosphopeptides
Accession number in uniprot	Accession number in Tair	PG.ProteinDescriptions	PG.Qvalue	PG.Cscore	PG.MolecularWeight	PEP.GroupingKey	EG.FoundInDB	EG.PrecursorId	EG.ModifiedSequence	EG.IntModifiedPeptide	EG.IsDecoy	SL-CK-1.EG.TotalQuantity	SL-CK-2.EG.TotalQuantity	SL-CK-3.EG.TotalQuantity	SL-V-1.EG.TotalQuantity	SL-V-2.EG.TotalQuantity	SL-V-3.EG.TotalQuantity	FC SL-V/SL-CK	P value	SL-CK-1.EG.Qvalue	SL-CK-2.EG.Qvalue	SL-CK-3.EG.Qvalue	SL-V-1.EG.Qvalue	SL-V-2.EG.Qvalue	SL-V-3.EG.Qvalue	SL-CK-1.EG.MeanApexRT	SL-CK-2.EG.MeanApexRT	SL-CK-3.EG.MeanApexRT	SL-V-1.EG.MeanApexRT	SL-V-2.EG.MeanApexRT	SL-V-3.EG.MeanApexRT	SL-CK-1.EG.PTMAssayProbability	SL-CK-2.EG.PTMAssayProbability	SL-CK-3.EG.PTMAssayProbability	SL-V-1.EG.PTMAssayProbability	SL-V-2.EG.PTMAssayProbability	SL-V-3.EG.PTMAssayProbability	SL-CK-1.EG.PTMAssayCandidateScore	SL-CK-2.EG.PTMAssayCandidateScore	SL-CK-3.EG.PTMAssayCandidateScore	SL-V-1.EG.PTMAssayCandidateScore	SL-V-2.EG.PTMAssayCandidateScore	SL-V-3.EG.PTMAssayCandidateScore
F4IFD0	AT2G04865	Protein MAIN-LIKE 2	4.83089e-15	0.891433	75509.1	GFSDVSGEENANR	TRUE	_GFS[Phospho]DVS[Phospho]GEENANR_.2	_GFS[Phospho]DVS[Phospho]GEENANR_	_GFS[+80]DVS[+80]GEENANR_	FALSE	4686202	4219334	4.04464e+06	3.61931e+06	4.36288e+06	3.64058e+06	0.897499	0.227254	1.9263e-29	8.12999e-23	4.91123e-30	1.4628e-19	1.30725e-15	2.73896e-20	51.7188	51.5469	51.6181	51.4022	51.5007	51.584	1	1	1	1	1	1
F4IXW2	AT3G43300	Brefeldin A-inhibited guanine nucleotide-exchange protein 5	2.1775e-22	0.910061	192883	NANEDSASTGEPIETK	TRUE	_NANEDSAS[Phospho]TGEPIETK_.2	_NANEDSAS[Phospho]TGEPIETK_	_NANEDSAS[+80]TGEPIETK_	FALSE	2.06272e+06	2.27439e+06		2.11995e+06	2256264	2.33997e+06	1.03236	0.582807	1.48308e-24	9.6246e-23		2.19067e-11	6.53182e-14	3.66335e-13	37.6676	37.7361		37.8927	37.8027	37.6819	0.980181	0.957965		0.986501	0.942121	0.900372	41.1458	39.4459		45.1	43.8134	39.851
O48847	AT2G32700	Transcriptional corepressor LEUNIG_HOMOLOG	1.93351e-13	0.887124	85514.7	DGQQNANDGSIGSPMQSSSSK	TRUE	_DGQQNANDGSIGS[Phospho]PMQSSSSK_.2	_DGQQNANDGSIGS[Phospho]PMQSSSSK_	_DGQQNANDGSIGS[+80]PMQSSSSK_	FALSE	388612	647285	703578	808861	911644	927152	1.5221	0.0434435	6.28506e-10	5.89478e-12	1.9621e-16	7.53425e-14	1.05236e-07	4.35092e-10	40.817	40.8101	40.5754	40.8419	40.953	40.9253	0.990103	0.999971	0.999993	0.999926	0.999973	0.999998	19.7886	22.4563	28.2971	26.0795	29.1612	27.5895
Q56WH4	AT5G22650	Histone deacetylase HDT2	7.97927e-17	0.896046	32348	SPVNANQSPK	TRUE	_S[Phospho]PVNANQS[Phospho]PK_.2	_S[Phospho]PVNANQS[Phospho]PK_	_S[+80]PVNANQS[+80]PK_	FALSE	82097.5	62195.8	72011.6	91582.6	92806.3	102752	1.32748	0.0249006	0.000229202	0.00816765	0.00667065	0.000156477	8.41183e-05	0.00564185	19.5042	19.5471	19.5973	19.6005	19.5216	19.4609	1	1	1	1	1	1
Q56WH4	AT5G22650	Histone deacetylase HDT2	7.97927e-17	0.896046	32348	SPVNANQSPK	TRUE	_SPVNANQS[Phospho]PK_.2	_SPVNANQS[Phospho]PK_	_SPVNANQS[+80]PK_	FALSE	18097548	23456968	27934452	19409300	21742768	22904226	0.92182	0.581479	1.91107e-37	2.17533e-34	3.70018e-33	1.34026e-24	1.46166e-19	6.24543e-20	24.2261	24.2502	24.0388	24.3356	24.2664	24.051	1	1	1	1	1	1	71.1732	63.3213	83.9286	74.2806	65.8251	70.3223
Q9ZUP4	AT2G19470	Casein kinase 1-like protein 5	6.81216e-24	0.913635	48921	EPFSGGSDNANYETALK	TRUE	_EPFS[Phospho]GGS[Phospho]DNANYETALK_.2	_EPFS[Phospho]GGS[Phospho]DNANYETALK_	_EPFS[+80]GGS[+80]DNANYETALK_	FALSE	908196	848431	1.0954e+06	914463	902601	864282	0.940155	0.49527	1.42398e-35	3.07559e-25	3.00161e-07	1.00321e-07	0.000850876	1.27683e-18	79.1842	79.213	79.1426	79.2381	79.1004	79.3377	0.99858	0.999006	0.994464	0.998843	0.993903	0.999076	15.8664	16.2365	11.8463	14.5438	11.9695	18.9849
Q9ZUP4	AT2G19470	Casein kinase 1-like protein 5	6.81216e-24	0.913635	48921	EPFSGGSDNANYETALK	TRUE	_EPFSGGS[Phospho]DNANYETALK_.2	_EPFSGGS[Phospho]DNANYETALK_	_EPFSGGS[+80]DNANYETALK_	FALSE	1.71341e+06		1331102	1554378		1.33751e+06	0.949868	0.761542	0.000164496		3.57869e-18	7.51234e-12		4.17106e-14	70.5616		70.8084	70.4985		70.9656	0.942731		0.98374	0.921202		0.959551	12.8755		15.0674	14.5231		17.3015
A0A178UBX1	AT5G23910	ATP binding microtubule motor family protein;Kinesin-like protein KIN-10C	9.93789e-08	0.867522	77373.9	SVSLSSAAQR	TRUE	_SVS[Phospho]LSSAAQR_.2	_SVS[Phospho]LSSAAQR_	_SVS[+80]LSSAAQR_	FALSE	228765	179880	201193	246529	184074	192998	1.02257	0.858274	0.000191466	0.00140634	1.96933e-13	0.000274095	0.00745668	0.00285368	43.0085	43.2012	42.9856	43.3088	43.1885	43.1778	0.966983	0.997957	0.938907	0.914216	0.989438	0.977995	9.07304	10.1667	4.83093	4.66311	6.63851	8.57238
A0A178UFC4	AT5G65613	Uncharacterized protein	0.000203049	0.834279	13163.7	DLPKQSPDH	TRUE	_DLPKQS[Phospho]PDH_.2	_DLPKQS[Phospho]PDH_	_DLPKQS[+80]PDH_	FALSE	530821	535332	348313	299571	439715	235308	0.689019	0.164302	7.62957e-05	8.64546e-14	5.01255e-14	0.000306013	0.00052699	5.3612e-09	28.1391	28.0088	27.4679	28.3769	28.1327	27.751	1	1	1	1	1	1
A0A178UFH0	AT5G59960	K-stimulated pyrophosphate-energized sodium pump protein	2.97529e-10	0.877427	35672.2	VSSPSSSFSR	TRUE	_VSS[Phospho]PSSSFSR_.2	_VSS[Phospho]PSSSFSR_	_VSS[+80]PSSSFSR_	FALSE	258695	261098	373970	243179	226772	262433	0.819437	0.243921	1.17991e-16	2.85989e-16	8.47766e-36	6.98811e-09	3.71555e-09	0.000278401	39.476	39.4062	39.2012	39.6085	39.6112	39.4751	0.965353	0.990194	0.988228	0.996829	0.989759	0.981587	18.9863	18.9887	17.8974	25.5907	18.3574	12.9497
A0A178UHQ5	AT5G25520	SPOC domain / Transcription elongation factor S-II protein;SPOC domain / Transcription elongation factor S-II protein;SPOC domain / Transcription elongation factor S-II protein;Putative PHD finger protein	0.000197426	0.834966	86081.4	SPPESTLSGSATSEK	TRUE	_S[Phospho]PPESTLSGSATSEK_.2	_S[Phospho]PPESTLSGSATSEK_	_S[+80]PPESTLSGSATSEK_	FALSE	71281.9	189437	379013	410712	626720	367667	2.19638	0.101132	0.000420656	1.39159e-10	0.00148894	2.01731e-11	2.04381e-09	2.26477e-12	41.3353	42.2051	41.5717	41.8201	42.1466	42.0588	0.998817	0.999039	0.996901	0.999927	0.998898	0.999954	10.5721	9.73805	8.56535	12.3154	9.60095	13.1398
A0A178US29	AT5G14210	Leucine-rich repeat protein kinase family protein;Leucine-rich repeat protein kinase family protein;Leucine-rich repeat protein kinase family protein (Fragment)	0.000380028	0.801796	88931.4	LGAQGVPSCR	TRUE	_LGAQGVPS[Phospho]C[Carbamidomethyl]R_.2	_LGAQGVPS[Phospho]C[Carbamidomethyl]R_	_LGAQGVPS[+80]C[+57]R_	FALSE	87253.1		99135.6	139548		74343.1	1.14756	0.718452	0.00216065		0.00290428	0.000187472		0.00172338	40.5818		40.2472	40.5454		40.6133	1		1	1		1
A0A178US29	AT5G14210	Leucine-rich repeat protein kinase family protein;Leucine-rich repeat protein kinase family protein;Leucine-rich repeat protein kinase family protein (Fragment)	0.000380028	0.801796	88931.4	SFSFEDLK	TRUE	_S[Phospho]FSFEDLK_.2	_S[Phospho]FSFEDLK_	_S[+80]FSFEDLK_	FALSE	157983	77158.7	101877	156770	120140	101755	1.12358	0.655688	0.000122595	0.000355883	0.00172859	0.000344194	0.00369878	0.00214012	87.8775	88.3269	88.1427	87.7088	88.3216	88.6623	0.994869	0.96942	0.907705	0.992271	0.987827	0.837298	6.26738	4.45634	3.28593	7.83296	6.85731	2.63826
A0A178US29	AT5G14210	Leucine-rich repeat protein kinase family protein;Leucine-rich repeat protein kinase family protein;Leucine-rich repeat protein kinase family protein (Fragment)	0.000380028	0.801796	88931.4	SFSFEDLK	TRUE	_SFS[Phospho]FEDLK_.2	_SFS[Phospho]FEDLK_	_SFS[+80]FEDLK_	FALSE	165533	101004		197164	149694	108215	1.13823	0.68349	0.00208468	0.000812254		0.000227149	1.20789e-05	0.00240483	83.6881	84.1141		83.803	84.0616	84.3496	0.910612	0.828305		0.975792	0.9964	0.8081	3.32113	2.57366		4.69657	6.62327	2.43771
A0A178UYH7	AT4G28820	HIT-type Zinc finger family protein;HIT-type Zinc finger family protein;At4g28820	4.29892e-07	0.864396	14181.4	PSDPSSTEEKPASPAK	TRUE	_PSDPSSTEEKPAS[Phospho]PAK_.2	_PSDPSSTEEKPAS[Phospho]PAK_	_PSDPSSTEEKPAS[+80]PAK_	FALSE	587712	745889	754645	689399	766242	851137	1.10465	0.366406	8.75865e-05	0.000225732	2.33785e-12	2.43561e-11	9.89682e-07	2.10613e-10	29.0058	28.8597	27.9795	29.3833	29.0302	28.8199	1	1	1	1	1	1	40.6208	54.1511	65.4698	74.6909	71.0726	64.1056
A0A178UYH7	AT4G28820	HIT-type Zinc finger family protein;HIT-type Zinc finger family protein;At4g28820	4.29892e-07	0.864396	14181.4	PSDPSSTEEKPASPAK	TRUE	_PSDPSSTEEKPAS[Phospho]PAK_.3	_PSDPSSTEEKPAS[Phospho]PAK_	_PSDPSSTEEKPAS[+80]PAK_	FALSE	742504	974231	990957	850185	1.00496e+06	1.12716e+06	1.10142	0.464659	5.66641e-06	0.000114504	9.03766e-05	0.000107836	5.10695e-05	1.75455e-06	29.0038	28.8424	27.9159	29.3352	29.0283	28.8333	0.999994	0.99981	1	0.999999	1	1	21.5296	18.4939	26.2888	25.2563	27.1857	26.0415
A0A178V0V7	AT4G28820	HIT-type Zinc finger family protein;HIT-type Zinc finger family protein;At4g28820	0.00257347	0.757094	14252.5	PSDPSSTEEKPAASPAK	TRUE	_PSDPSSTEEKPAAS[Phospho]PAK_.3	_PSDPSSTEEKPAAS[Phospho]PAK_	_PSDPSSTEEKPAAS[+80]PAK_	FALSE	92213.1	113726	148193	131958	118963	141542	1.10824	0.50733	0.00180824	0.00150293	0.000369183	0.00243592	0.00100104	0.00035804	29.8841	29.6325	28.8613	30.4329	30.0948	29.9146	0.967592	0.980594	0.999494	0.875093	0.99958	0.999992	7.78628	6.75798	11.4071	8.31371	13.5843	18.926
A0A178V207	AT4G33625	Vacuole protein;Vacuole protein;At4g33625	5.50894e-11	0.87985	19249.6	TEEIEESPAGPSSGSAK	TRUE	_TEEIEES[Phospho]PAGPSSGSAK_.2	_TEEIEES[Phospho]PAGPSSGSAK_	_TEEIEES[+80]PAGPSSGSAK_	FALSE	267236	384247	435805	310524	358557	456064	1.03482	0.857102	1.09374e-21	6.82144e-20	2.39693e-14	3.48467e-16	1.65717e-16	5.13976e-08	39.4191	39.2034	39.1058	39.4441	39.3697	39.249	0.912216	0.999997	0.999999	0.998195	0.999789	0.999631	19.5414	23.6333	25.129	19.4407	19.7865	21.7999
A0A178V207	AT4G33625	Vacuole protein;Vacuole protein;At4g33625	5.50894e-11	0.87985	19249.6	TEEIEESPAGPSSGSAK	TRUE	_TEEIEESPAGPSSGS[Phospho]AK_.2	_TEEIEESPAGPSSGS[Phospho]AK_	_TEEIEESPAGPSSGS[+80]AK_	FALSE	1.04363e+06	1.2491e+06	1.50148e+06		611875	668048	0.506003	0.0360421	2.64261e-20	2.5899e-15	1.26674e-23		4.15516e-08	9.05977e-15	42.0922	42.2699	42.1296		42.4112	42.3087	0.978059	0.999248	0.998028		0.903139	0.970452	26.1311	35.8236	36.0748		33.2921	24.0395
A0A178VAM2	AT3G06370	Sodium hydrogen exchanger 4	0.000293893	0.814264	61135.5	GVSPVVPGSPIENSVPQWSEEVENK	TRUE	_GVSPVVPGSPIENS[Phospho]VPQWSEEVENK_.3	_GVSPVVPGSPIENS[Phospho]VPQWSEEVENK_	_GVSPVVPGSPIENS[+80]VPQWSEEVENK_	FALSE		2.50206e+06	3.4311e+06	5520704	4743166	3.91079e+06	1.59271	0.0848329		0.000181219	0.00164501	0.000911506	0.00375886	2.56508e-07		96.6922	96.3082	96.3933	96.5424	97.0025		0.992715	0.952305	0.92792	0.983776	0.91389		20.9884	24.7766	19.5013	24.3773	18.9194
A0A178VAV0	AT3G53930	Protein kinase superfamily protein;Protein kinase superfamily protein;Protein kinase superfamily protein;Serine/threonine-protein kinase ATG1b	2.49342e-08	0.87018	58576.9	EAALSPLK	TRUE	_EAALS[Phospho]PLK_.2	_EAALS[Phospho]PLK_	_EAALS[+80]PLK_	FALSE	680176	661887	595764	523568	533070	532962	0.8203	0.0108758	2.81194e-15	3.48397e-16	1.65939e-15	2.77979e-13	1.07571e-11	5.7522e-09	50.6765	50.8724	50.7432	50.7128	50.8261	50.8016	1	1	1	1	1	1
A0A178VAV0	AT3G53930	Protein kinase superfamily protein;Protein kinase superfamily protein;Protein kinase superfamily protein;Serine/threonine-protein kinase ATG1b	2.49342e-08	0.87018	58576.9	SHSPPVEFIK	TRUE	_SHS[Phospho]PPVEFIK_.2	_SHS[Phospho]PPVEFIK_	_SHS[+80]PPVEFIK_	FALSE		2.05314e+06	1559636	1.99119e+06	2.07154e+06		1.12454	0.46315		1.3583e-09	7.7792e-14	1.86403e-21	6.62455e-17			67.4555	68.7614	66.1766	67.9237			0.840682	0.990714	0.886509	0.999195			3.44119	5.66997	3.46717	10.1091
A0A178VCD6	AT3G01490	Protein kinase superfamily protein;AT3g01490/F4P13_4	2.36454e-22	0.909974	40037.4	KSLSDGEDNVNNTR	TRUE	_KS[Phospho]LS[Phospho]DGEDNVNNTR_.2	_KS[Phospho]LS[Phospho]DGEDNVNNTR_	_KS[+80]LS[+80]DGEDNVNNTR_	FALSE	967309	1.02193e+06	1.26776e+06	1.28833e+06	1.24658e+06	1.30712e+06	1.17962	0.106989	2.44567e-19	3.21039e-12	3.14007e-18	4.55588e-13	3.15446e-07	2.90961e-11	34.807	34.7952	34.3218	34.8325	34.9265	34.821	1	1	1	1	1	1	48.1786	46.0098	40.2574	45.1554	48.1911	41.1003
A0A178VCD6	AT3G01490	Protein kinase superfamily protein;AT3g01490/F4P13_4	2.36454e-22	0.909974	40037.4	SLSDGEDNVNNTR	TRUE	_S[Phospho]LS[Phospho]DGEDNVNNTR_.2	_S[Phospho]LS[Phospho]DGEDNVNNTR_	_S[+80]LS[+80]DGEDNVNNTR_	FALSE	476824	472493	561006	566159	600064	619654	1.18245	0.0486861	2.55871e-19	8.9698e-05	5.74002e-09	6.51639e-16	9.68917e-11	1.99604e-13	39.0649	38.7953	38.959	38.9672	38.8006	38.8487	1	1	0.999999	1	1	1	27.4536	27.301	14.5414	27.1884	38.2257	34.2794
A0A178VCD6	AT3G01490	Protein kinase superfamily protein;AT3g01490/F4P13_4	2.36454e-22	0.909974	40037.4	SLSDGEDNVNNTR	TRUE	_S[Phospho]LSDGEDNVNNTR_.2	_S[Phospho]LSDGEDNVNNTR_	_S[+80]LSDGEDNVNNTR_	FALSE	1.87323e+06	1.81674e+06	2.24428e+06		2.36422e+06	2474595	1.22311	0.089252	0.00234511	0.000504754	0.000735831		0.00324457	0.00137379	37.8309	37.8041	37.6777		37.9844	37.8451	0.997707	0.981455	0.999126		0.999659	0.99995	59.606	50.8923	57.8605		61.7923	62.3437
A0A178VCD6	AT3G01490	Protein kinase superfamily protein;AT3g01490/F4P13_4	2.36454e-22	0.909974	40037.4	SLSDGEDNVNNTR	TRUE	_SLS[Phospho]DGEDNVNNTR_.2	_SLS[Phospho]DGEDNVNNTR_	_SLS[+80]DGEDNVNNTR_	FALSE	3.73519e+06	3995666	4.66018e+06		4.91174e+06	5294965	1.23558	0.0847063	2.79314e-39	2.09353e-27	1.7374e-34		2.14136e-21	8.06066e-22	38.4762	38.3755	38.231		38.4267	38.3981	0.999896	0.996183	0.999765		0.999403	0.998803	77.2136	72.3457	69.1892		76.4556	67.6301
A0A178VD67	AT3G51470	Protein-serine/threonine phosphatase;Probable protein phosphatase 2C 47	2.04323e-29	0.925758	34710.5	SPEGVNSTFQPVFR	TRUE	_S[Phospho]PEGVNSTFQPVFR_.2	_S[Phospho]PEGVNSTFQPVFR_	_S[+80]PEGVNSTFQPVFR_	FALSE	787052	860603	656086	1.08006e+06	929503	804034	1.22132	0.163526	4.6606e-27	1.26683e-11	3.72831e-12	4.16716e-22	2.36036e-12	3.25827e-13	82.3424	82.7401	82.4703	82.3314	82.6431	82.8941	0.999999	0.999999	0.999997	0.99998	0.999999	1	15.7263	15.1664	14.4551	12.4946	16.1458	23.1835
A0A178VD67	AT3G51470	Protein-serine/threonine phosphatase;Probable protein phosphatase 2C 47	2.04323e-29	0.925758	34710.5	SISAEGLDLLK	TRUE	_SIS[Phospho]AEGLDLLK_.2	_SIS[Phospho]AEGLDLLK_	_SIS[+80]AEGLDLLK_	FALSE	728234	726428	470263	1219872	1.08662e+06	978544	1.70658	0.0148253	7.16006e-17	2.09403e-16	2.13762e-08	1.48559e-12	1.6214e-10	1.13744e-10	92.7426	93.4869	93.3346	92.8799	93.4001	93.6772	0.822457	0.995482	0.984582	0.999999	0.999533	0.999979	2.59337	6.39523	5.15666	14.9238	8.85519	11.7949
A0A178VEL3	AT3G01310	Inositol hexakisphosphate and diphosphoinositol-pentakisphosphate kinase;Inositol hexakisphosphate and diphosphoinositol-pentakisphosphate kinase VIP1;Inositol hexakisphosphate and diphosphoinositol-pentakisphosphate kinase	2.31049e-17	0.897419	115857	ESDSDAEDLEHAEK	TRUE	_ES[Phospho]DS[Phospho]DAEDLEHAEK_.2	_ES[Phospho]DS[Phospho]DAEDLEHAEK_	_ES[+80]DS[+80]DAEDLEHAEK_	FALSE	3873447	3680518	3584180	3.39329e+06	3.48264e+06	3.40584e+06	0.923113	0.033244	3.25351e-17	1.08251e-14	4.90451e-15	3.64911e-13	1.58171e-08	2.44514e-11	49.0972	49.1845	49.0527	49.1185	49.0464	49.2209	1	1	1	1	1	1
A0A178VEL3	AT3G01310	Inositol hexakisphosphate and diphosphoinositol-pentakisphosphate kinase;Inositol hexakisphosphate and diphosphoinositol-pentakisphosphate kinase VIP1;Inositol hexakisphosphate and diphosphoinositol-pentakisphosphate kinase	2.31049e-17	0.897419	115857	ESDSDAEDLEHAEK	TRUE	_ES[Phospho]DS[Phospho]DAEDLEHAEK_.3	_ES[Phospho]DS[Phospho]DAEDLEHAEK_	_ES[+80]DS[+80]DAEDLEHAEK_	FALSE	585640	576163	550550	558138	466140		0.897254	0.209822	6.66421e-05	0.00130433	0.000447423	0.000263204	0.00615344		49.0644	49.1826	49.097	49.1318	49.0598		1	1	1	1	1
A0A178VEL3	AT3G01310	Inositol hexakisphosphate and diphosphoinositol-pentakisphosphate kinase;Inositol hexakisphosphate and diphosphoinositol-pentakisphosphate kinase VIP1;Inositol hexakisphosphate and diphosphoinositol-pentakisphosphate kinase	2.31049e-17	0.897419	115857	GADLSPLR	TRUE	_GADLS[Phospho]PLR_.2	_GADLS[Phospho]PLR_	_GADLS[+80]PLR_	FALSE	678971	60956.2		728147	60628.2	57713.4	0.762678	0.827105	0.00276335	0.00398887		0.00866757	0.00241619	0.000539602	47.4688	45.618		47.9689	52.0233	52.1464	1	1		1	1	1
A0A178VEL3	AT3G01310	Inositol hexakisphosphate and diphosphoinositol-pentakisphosphate kinase;Inositol hexakisphosphate and diphosphoinositol-pentakisphosphate kinase VIP1;Inositol hexakisphosphate and diphosphoinositol-pentakisphosphate kinase	2.31049e-17	0.897419	115857	QGSGIIGTFGQSEELR	TRUE	_QGS[Phospho]GIIGTFGQSEELR_.2	_QGS[Phospho]GIIGTFGQSEELR_	_QGS[+80]GIIGTFGQSEELR_	FALSE	30949178	29391208	26623592	26728874	26924608	26662736	0.923557	0.155282	4.31376e-23	4.26084e-15	3.93332e-21	3.17802e-17	3.04669e-11	8.46171e-13	88.7518	89.1235	88.9408	88.7373	89.1483	89.4119	1	1	1	1	1	1	63.7323	62.4335	55.5467	60.6094	49.9095	59.6457
A0A178VEL3	AT3G01310	Inositol hexakisphosphate and diphosphoinositol-pentakisphosphate kinase;Inositol hexakisphosphate and diphosphoinositol-pentakisphosphate kinase VIP1;Inositol hexakisphosphate and diphosphoinositol-pentakisphosphate kinase	2.31049e-17	0.897419	115857	SAAVLER	TRUE	_S[Phospho]AAVLER_.2	_S[Phospho]AAVLER_	_S[+80]AAVLER_	FALSE		360569	423023	319908	361089	355962	0.882228	0.205811		0.00113796	0.000168078	0.000161947	0.00367503	0.00363889		36.3638	36.0167	36.6449	36.4163	36.3877		1	1	1	1	1
A0A178VEL3	AT3G01310	Inositol hexakisphosphate and diphosphoinositol-pentakisphosphate kinase;Inositol hexakisphosphate and diphosphoinositol-pentakisphosphate kinase VIP1;Inositol hexakisphosphate and diphosphoinositol-pentakisphosphate kinase	2.31049e-17	0.897419	115857	TRPGRESDSDAEDLEHAEK	TRUE	_TRPGRES[Phospho]DS[Phospho]DAEDLEHAEK_.3	_TRPGRES[Phospho]DS[Phospho]DAEDLEHAEK_	_TRPGRES[+80]DS[+80]DAEDLEHAEK_	FALSE	15552858	11048020		14615537	3875432	289560	0.470674	0.311967	1.1186e-17	7.73734e-16		1.286e-18	1.51835e-07	0.00254531	60.9437	64.1444		62.1144	64.86	64.8405	1	0.999996		1	1	0.964575	21.013	16.6425		23.1828	15.8828	6.31175
A0A178VEL3	AT3G01310	Inositol hexakisphosphate and diphosphoinositol-pentakisphosphate kinase;Inositol hexakisphosphate and diphosphoinositol-pentakisphosphate kinase VIP1;Inositol hexakisphosphate and diphosphoinositol-pentakisphosphate kinase	2.31049e-17	0.897419	115857	TRPGRESDSDAEDLEHAEK	TRUE	_TRPGRES[Phospho]DSDAEDLEHAEK_.4	_TRPGRES[Phospho]DSDAEDLEHAEK_	_TRPGRES[+80]DSDAEDLEHAEK_	FALSE	184080	344044		237955	247564		0.919327	0.815243	0.00177535	0.000889068		0.000221533	0.000358313		80.3892	83.257		80.349	84.567		0.765852	0.856919		0.816437	0.853817		7.38732	7.08312		5.10022	6.87068
A0A178VEL3	AT3G01310	Inositol hexakisphosphate and diphosphoinositol-pentakisphosphate kinase;Inositol hexakisphosphate and diphosphoinositol-pentakisphosphate kinase VIP1;Inositol hexakisphosphate and diphosphoinositol-pentakisphosphate kinase	2.31049e-17	0.897419	115857	VNEPVQSNEGLTR	TRUE	_VNEPVQSNEGLT[Phospho]R_.2	_VNEPVQSNEGLT[Phospho]R_	_VNEPVQSNEGLT[+80]R_	FALSE	30193.2	50881.3		20624.9	65402.1		1.06109	0.929182	0.00126407	0.00194697		0.00256724	0.00166392		43.7484	43.8179		44.0022	43.7897		0.999673	0.997169		0.982598	0.997072		9.02462	9.21058		5.03362	8.96098
A0A178VGS0	AT3G13420	Transmembrane protein	0.00516692	0.737514	29357	SLEALHSSLC	TRUE	_S[Phospho]LEALHSSLC[Carbamidomethyl]_.2	_S[Phospho]LEALHSSLC[Carbamidomethyl]_	_S[+80]LEALHSSLC[+57]_	FALSE		173246	133135	81816.3	97023.7	86701.8	0.577804	0.0273796		0.0068619	0.000800363	0.00220992	0.00232581	0.00621526		68.4217	68.5127	68.081	68.3826	68.4405		0.999825	0.993984	0.977051	0.989337	0.990208		10.3408	6.80045	5.44442	6.22344	6.9969
A0A178VII2	AT3G50240	Kinesin-like protein;ATP binding microtubule motor family protein;Kinesin-like protein;Kinesin-like protein KIN-4B	0.000274315	0.822042	108155	FLSPNTR	TRUE	_FLS[Phospho]PNTR_.2	_FLS[Phospho]PNTR_	_FLS[+80]PNTR_	FALSE	132187	68766.1		113650	131186		1.21837	0.573472	0.00565381	0.000309735		0.000107836	0.000243933		49.5717	49.7669		49.7004	49.6902		0.946564	0.986252		0.999923	0.999976		4.07544	6.74005		10.4729	11.6324
A0A178VL78	AT3G14205	Phosphoinositide phosphatase family protein;Phosphoinositide phosphatase SAC2	4.19988e-14	0.888937	71351.8	SFETIPESR	TRUE	_S[Phospho]FET[Phospho]IPESR_.2	_S[Phospho]FET[Phospho]IPESR_	_S[+80]FET[+80]IPESR_	FALSE	78073.4	96801.6	73240.1	81941.8	86578.2	66930.8	0.948958	0.673935	0.00266837	0.00161177	3.63645e-05	0.000878705	0.00170293	0.00912776	59.2607	58.9374	59.1056	59.0644	58.9632	59.05	0.999345	0.996298	0.9992	0.99914	0.9903	0.992729	8.33013	6.59158	8.12966	8.05674	5.61608	5.90915
A0A178VL78	AT3G14205	Phosphoinositide phosphatase family protein;Phosphoinositide phosphatase SAC2	4.19988e-14	0.888937	71351.8	SFETIPESR	TRUE	_S[Phospho]FETIPESR_.2	_S[Phospho]FETIPESR_	_S[+80]FETIPESR_	FALSE	1.54349e+06	1.21611e+06	1.14892e+06	934264	968708	929465	0.724683	0.042898	1.10683e-17	2.61456e-23	3.36056e-29	6.28289e-16	3.95384e-16	7.43136e-15	56.5365	56.7039	56.669	56.5552	56.6527	56.7237	1	1	1	0.999999	1	0.999994	24.6501	23.1452	23.6472	17.2577	19.7907	19.6421
A0A178VL84	AT3G20250	Pumilio 5	1.07167e-24	0.915484	105631	AIENYDSEEEIR	TRUE	_AIENYDS[Phospho]EEEIR_.2	_AIENYDS[Phospho]EEEIR_	_AIENYDS[+80]EEEIR_	FALSE	1884230	1.88496e+06	1.59853e+06	1.49251e+06	1.44615e+06	1.76707e+06	0.876673	0.185775	9.77479e-29	1.15579e-12	2.99113e-22	2.73771e-29	3.73817e-17	8.90066e-16	56.721	56.8574	56.8845	56.7553	56.8687	56.8618	0.999999	0.9072	1	0.832303	0.992181	0.999356	15.1932	3.27992	19.2946	2.60204	5.85426	8.34715
A0A178VL84	AT3G20250	Pumilio 5	1.07167e-24	0.915484	105631	QASHEDNNLSVFGASPPSSVASR	TRUE	_QASHEDNNLSVFGAS[Phospho]PPSSVASR_.3	_QASHEDNNLSVFGAS[Phospho]PPSSVASR_	_QASHEDNNLSVFGAS[+80]PPSSVASR_	FALSE	2.73564e+06	2.90009e+06	2.42888e+06	1.32235e+06	1.45525e+06	1.3394e+06	0.510503	0.00080125	3.60953e-12	1.38293e-15	2.75638e-21	0.00037294	3.66548e-09	8.67851e-08	75.7497	76.7978	77.2319	75.9891	77.0535	77.7532	0.908375	0.999705	0.999942	0.999476	0.999702	0.999991	12.9596	25.2665	24.9762	18.3526	22.3022	25.1316
A0A178VL84	AT3G20250	Pumilio 5	1.07167e-24	0.915484	105631	SESAPPSMEGSFAALR	TRUE	_SES[Phospho]APPSM[Oxidation]EGSFAALR_.2	_SES[Phospho]APPSM[Oxidation]EGSFAALR_	_SES[+80]APPSM[+16]EGSFAALR_	FALSE	1.91663e+06	1.66475e+06	1.4523e+06	1.68735e+06	1.21244e+06	1.24227e+06	0.822869	0.218774	5.63323e-19	2.10093e-18	1.38978e-20	4.52266e-26	1.72356e-09	8.90564e-11	67.3104	67.5756	67.6046	67.3115	67.4447	67.4253	0.814076	0.793836	0.78978	0.78175	0.802905	0.791583	34.7174	33.8316	35.8757	29.6497	36.9708	38.3588
A0A178VL84	AT3G20250	Pumilio 5	1.07167e-24	0.915484	105631	SESAPPSMEGSFAALR	TRUE	_SES[Phospho]APPSMEGSFAALR_.2	_SES[Phospho]APPSMEGSFAALR_	_SES[+80]APPSMEGSFAALR_	FALSE	2.59073e+06	2.06181e+06	2.15566e+06	2.58637e+06	2.22244e+06	2.25405e+06	1.0374	0.693427	3.74249e-14	1.10818e-17	7.89668e-15	2.35836e-20	5.58244e-09	2.26345e-08	83.9578	84.2976	83.8748	84.0226	84.1672	84.4337	0.950746	0.942523	0.950293	0.930559	0.964368	0.889061	24.9385	23.0044	24.0401	20.9914	32.1496	28.2379
A0A178VPL7	AT2G45460	SMAD/FHA domain-containing protein	0.000309907	0.809847	99827.4	GSLSSDPDTER	TRUE	_GSLS[Phospho]S[Phospho]DPDTER_.2	_GSLS[Phospho]S[Phospho]DPDTER_	_GSLS[+80]S[+80]DPDTER_	FALSE	107943	108626	164432	139814	119821		1.02218	0.918324	0.00426418	0.00700805	1.73122e-05	0.00078558	0.00205266		33.4232	33.1787	33.1666	33.2962	33.0176		0.996383	0.936321	0.997622	0.999366	0.997521		9.66981	7.59563	10.0779	10.5807	11.4345
A0A178VPL7	AT2G45460	SMAD/FHA domain-containing protein	0.000309907	0.809847	99827.4	PTSPGVLVTNK	TRUE	_PTS[Phospho]PGVLVTNK_.2	_PTS[Phospho]PGVLVTNK_	_PTS[+80]PGVLVTNK_	FALSE		124829	147785	171886	219967	176674	1.39031	0.0898449		0.000287774	2.06747e-12	0.000112115	0.000109657	0.00160572		49.3847	49.4072	49.3952	49.3694	49.4211		0.882812	0.911832	0.942757	0.946803	0.974217		9.28733	7.95869	11.5849	12.9439	10.4346
A0A178VRH8	AT2G47630	Alpha/beta-Hydrolases superfamily protein	9.90585e-18	0.898356	36797.8	TADPASLTVTPIR	TRUE	_TADPAS[Phospho]LTVTPIR_.2	_TADPAS[Phospho]LTVTPIR_	_TADPAS[+80]LTVTPIR_	FALSE	215135	133374	120355		247450	211158	1.46719	0.170042	0.0002097	0.00160797	6.0356e-07		3.40975e-07	5.32343e-10	71.1436	71.5186	71.4214		71.4939	71.5782	0.905025	0.995295	0.934472		0.996497	0.951263	9.84394	12.5011	9.00996		16.2442	13.6742
A0A178VRH8	AT2G47630	Alpha/beta-Hydrolases superfamily protein	9.90585e-18	0.898356	36797.8	TADPASLTVTPIR	TRUE	_TADPASLTVT[Phospho]PIR_.2	_TADPASLTVT[Phospho]PIR_	_TADPASLTVT[+80]PIR_	FALSE	1.15192e+06	1.52309e+06	1.06816e+06	1.93092e+06	2.69114e+06	1.82737e+06	1.72299	0.0420915	2.12078e-33	1.88917e-06	5.88971e-17	2.69611e-12	3.26389e-19	2.30519e-20	67.1475	67.5202	67.6415	67.2562	67.4815	67.4468	0.997457	0.99051	0.99999	0.999644	0.992989	0.999996	25.6384	22.9727	28.4472	26.3034	23.858	35.9465
A0A178VRH8	AT2G47630	Alpha/beta-Hydrolases superfamily protein	9.90585e-18	0.898356	36797.8	VGNTTSVQR	TRUE	_VGNTTS[Phospho]VQR_.2	_VGNTTS[Phospho]VQR_	_VGNTTS[+80]VQR_	FALSE	88694.8	103127		139167	142921	147426	1.49275	0.00468505	0.00338286	0.00103167		0.000263084	0.000254373	0.000421431	24.1904	24.1683		24.2689	24.246	23.9845	0.9175	0.999713		0.999782	0.999986	0.99985	4.102	9.98655		12.7406	14.2031	19.3337
A0A178VXX1	AT2G18790	Phytochrome;Phytochrome B	0.000636104	0.790279	125037	VSGVGGSGGGR	TRUE	_VS[Phospho]GVGGS[Phospho]GGGR_.2	_VS[Phospho]GVGGS[Phospho]GGGR_	_VS[+80]GVGGS[+80]GGGR_	FALSE	53287.1	56599.9	73292.9	47740.6	90442.3	60040.7	1.08213	0.740425	0.00135844	0.00026109	0.00140924	0.000904125	0.000753054	1.93318e-05	20.5705	20.4703	20.511	20.4742	20.4469	20.4501	1	1	1	1	1	1
A0A178VXX1	AT2G18790	Phytochrome;Phytochrome B	0.000636104	0.790279	125037	VSGVGGSGGGR	TRUE	_VS[Phospho]GVGGSGGGR_.2	_VS[Phospho]GVGGSGGGR_	_VS[+80]GVGGSGGGR_	FALSE	526608	468303	538913	598082	544800	683737	1.19089	0.10092	0.000872426	0.000196942	0.000134499	0.000269664	0.000233979	0.000335018	21.7771	21.8003	21.4721	21.789	21.7481	21.6432	0.999657	0.999863	0.998061	1	1	0.999928	8.97734	9.89301	7.24343	18.0472	15.5873	10.5393
A0A178VZ48	AT2G37840	Protein kinase superfamily protein;Serine/threonine-protein kinase ATG1c	7.89314e-14	0.888186	49309	SQSPPVELFNR	TRUE	_SQS[Phospho]PPVELFNR_.2	_SQS[Phospho]PPVELFNR_	_SQS[+80]PPVELFNR_	FALSE	3.699e+06	3069965	3.67544e+06	3.24924e+06	2.95946e+06	3.31014e+06	0.911381	0.255297	3.88353e-35	2.95424e-22	2.70761e-27	3.45409e-15	1.57558e-08	4.68101e-14	74.7915	75.3169	75.3512	74.9245	75.2026	75.4418	1	0.999691	0.999025	0.999774	0.999997	0.999453	17.7826	16.3277	12.4448	21.9417	18.2368	13.4639
A0A178W540	AT1G04020	Breast cancer associated RING 1;Breast cancer associated RING 1;BRCA1-associated RING domain protein 1	0.000258751	0.825846	79561.9	NDALNNSNSPK	TRUE	_NDALNNSNS[Phospho]PK_.2	_NDALNNSNS[Phospho]PK_	_NDALNNSNS[+80]PK_	FALSE	75774.1	70324.6	79920.3	77013.9	89066.5	99121	1.17336	0.134162	0.0002058	7.26394e-12	0.000163858	0.000799412	0.0003699	5.13906e-09	24.7881	24.8579	24.6678	25.0839	24.9518	24.6133	0.999425	0.999978	0.991629	0.997217	0.996793	0.999527	9.69933	11.7059	5.77459	7.3681	8.26325	11.9582
A0A178W7I4	AT1G03060	BEACH-DOMAIN HOMOLOG A1;BEACH-DOMAIN HOMOLOG A1;BEACH-DOMAIN HOMOLOG A1;Protein SPIRRIG	3.36881e-08	0.869625	400807	ASSTNEASLHSALDFGGK	TRUE	_ASS[Phospho]T[Phospho]NEAS[Phospho]LHS[Phospho]ALDFGGK_.2	_ASS[Phospho]T[Phospho]NEAS[Phospho]LHS[Phospho]ALDFGGK_	_ASS[+80]T[+80]NEAS[+80]LHS[+80]ALDFGGK_	FALSE	579670	479573	382391	561559	521152	435972	1.05345	0.724553	1.77683e-05	0.000264378	2.82219e-13	0.000515062	0.000309528	1.88487e-05	85.9157	85.406	85.5431	85.8019	85.4234	85.8585	0.930635	0.93197	0.940918	0.935083	0.937201	0.930765	5.7469	5.75679	4.1991	5.23077	4.9754	5.01119
A0A178W7I4	AT1G03060	BEACH-DOMAIN HOMOLOG A1;BEACH-DOMAIN HOMOLOG A1;BEACH-DOMAIN HOMOLOG A1;Protein SPIRRIG	3.36881e-08	0.869625	400807	HINDADDSGSQGSLPHDQDQSTK	TRUE	_HINDADDSGS[Phospho]QGS[Phospho]LPHDQDQSTK_.3	_HINDADDSGS[Phospho]QGS[Phospho]LPHDQDQSTK_	_HINDADDSGS[+80]QGS[+80]LPHDQDQSTK_	FALSE	1.14683e+06	1.39823e+06		1.36118e+06	1.31154e+06	1.41577e+06	1.07096	0.438886	3.67433e-08	1.62447e-11		2.76647e-07	7.2034e-05	1.44818e-07	40.5862	40.6867		40.9027	41.1213	40.9555	0.999552	0.977804		0.95448	0.810322	0.902488	47.2719	36.3942		47.917	37.0775	31.9705
A0A178W886	AT1G24706	THO complex subunit 2	4.28243e-24	0.914106	203123	DRSVEAR	TRUE	_DRS[Phospho]VEAR_.2	_DRS[Phospho]VEAR_	_DRS[+80]VEAR_	FALSE	481090	285935	513664		165010	244187	0.479269	0.104464	0.00225144	0.00641643	1.28054e-17		0.000743443	0.000292534	15.9909	16.2816	16.1603		16.0601	16.2104	1	1	1		1	1
A0A178W886	AT1G24706	THO complex subunit 2	4.28243e-24	0.914106	203123	LTPTANTTANR	TRUE	_LT[Phospho]PTANTTANR_.2	_LT[Phospho]PTANTTANR_	_LT[+80]PTANTTANR_	FALSE	101420	115528	109509	88901.5	140044	132213	1.10629	0.520023	1.03025e-07	1.67691e-10	4.27798e-09	9.93661e-05	0.000301744	0.00030563	32.7194	32.7043	32.4781	32.9616	32.5598	32.6566	0.996251	0.999947	0.99999	0.9995	0.999634	0.999843	7.6811	11.9438	14.5772	9.69861	10.012	10.8583
A0A178W886	AT1G24706	THO complex subunit 2	4.28243e-24	0.914106	203123	RRSEENLSVSVDDAK	TRUE	_RRS[Phospho]EENLSVSVDDAK_.3	_RRS[Phospho]EENLSVSVDDAK_	_RRS[+80]EENLSVSVDDAK_	FALSE	115987	158609	141439		111622	129940	0.870943	0.378894	0.000134964	0.000793266	0.00144448		0.000973114	0.00131042	79.3892	83.7723	89.1257		84.5718	89.6737	0.961699	0.918308	0.96826		0.989721	0.793124	4.91637	4.11272	5.11108		6.26044	3.48463
A0A178W886	AT1G24706	THO complex subunit 2	4.28243e-24	0.914106	203123	SLPLKEDFEASK	TRUE	_S[Phospho]LPLKEDFEASK_.2	_S[Phospho]LPLKEDFEASK_	_S[+80]LPLKEDFEASK_	FALSE	3.23743e+06	1.86376e+06	1.70534e+06	2.67319e+06	2155612	2.05946e+06	1.01201	0.960909	2.01492e-26	1.08668e-20	1.70891e-30	2.14855e-10	8.27078e-12	6.26599e-13	71.8689	72.9983	73.707	72.0981	73.2379	73.6913	1	1	1	1	1	1	21.8834	22.3225	17.4477	23.7994	22.5563	24.5912
A0A178WJA6	AT1G10450	Paired amphipathic helix Sin3-like protein;Paired amphipathic helix protein Sin3-like 6	4.55942e-33	0.933014	128542	HELEEGELSPTASR	TRUE	_HELEEGELS[Phospho]PTASR_.2	_HELEEGELS[Phospho]PTASR_	_HELEEGELS[+80]PTASR_	FALSE	1.4255e+06	431344		1.53213e+06	810869		1.26182	0.730472	5.7055e-41	1.89843e-13		4.16778e-30	0.00156234		53.6424	54.7459		53.801	54.652		0.999368	0.935487		0.998101	0.991101		11.827	4.91306		9.84504	6.40603
A0A178WLG7	AT1G51790	Leucine-rich repeat protein kinase family protein	9.38395e-12	0.882246	103530	RETGFSTR	TRUE	_RET[Phospho]GFSTR_.2	_RET[Phospho]GFSTR_	_RET[+80]GFSTR_	FALSE		296976	435137		176609	275742	0.61787	0.241663		0.000151398	0.00429048		0.000506093	0.00124055		36.1111	35.0541		36.594	36.1353		0.986036	0.991978		0.986234	0.971083		9.41901	6.51071		5.96485	6.40079
A0A1I9LL80	AT3G24880	Helicase/SANT-associated, DNA binding protein;Helicase/SANT-associated, DNA binding protein;Helicase/SANT-associated, DNA binding protein;Chromatin modification-related protein EAF1 B;Chromatin modification-related protein EAF1 A	2.78369e-13	0.886686	206673	AQLVSTGGSPK	TRUE	_AQLVSTGGS[Phospho]PK_.2	_AQLVSTGGS[Phospho]PK_	_AQLVSTGGS[+80]PK_	FALSE	1.99111e+06	2.27594e+06	2.75719e+06	2.51705e+06	2.37829e+06	2.58454e+06	1.06487	0.547857	3.67908e-28	1.61146e-24	1.09794e-25	6.42495e-23	5.70338e-13	8.3033e-16	36.8793	37.0552	36.7254	37.228	37.107	36.9861	1	1	1	1	1	1	32.707	31.4305	35.5431	29.5856	30.6222	38.1146
A0A1I9LL80	AT3G24880	Helicase/SANT-associated, DNA binding protein;Helicase/SANT-associated, DNA binding protein;Helicase/SANT-associated, DNA binding protein;Chromatin modification-related protein EAF1 B;Chromatin modification-related protein EAF1 A	2.78369e-13	0.886686	206673	SSSTDLVQNR	TRUE	_SSS[Phospho]TDLVQNR_.2	_SSS[Phospho]TDLVQNR_	_SSS[+80]TDLVQNR_	FALSE	143866	173237	228636	185512	210345		1.08804	0.664298	1.2844e-21	2.54604e-18	2.31821e-12	3.72728e-05	4.03141e-06		37.0676	37.1511	36.9137	37.37	37.249		0.961327	0.963792	0.785546	0.980621	0.980788		8.0281	9.27493	7.9142	9.38488	7.47162
A0A1I9LL90	AT3G02890	RING/FYVE/PHD zinc finger superfamily protein	8.58273e-18	0.898515	85006.3	SNSFNSLSSR	TRUE	_SNS[Phospho]FNSLSSR_.2	_SNS[Phospho]FNSLSSR_	_SNS[+80]FNSLSSR_	FALSE	279874	283670	498708	683482	670008	798852	2.0262	0.0119332	1.81478e-09	0.000237852	6.22023e-08	0.000106044	1.33676e-07	2.42569e-08	47.2849	47.3863	47.0664	47.2289	47.4952	47.331	0.998985	0.987882	0.999818	0.999303	0.998323	0.999859	15.4724	13.3321	18.9662	19.7002	18.2767	21.0446
A0A1I9LLC0	AT3G14010	CTC-interacting domain 4;CTC-interacting domain 4;Polyadenylate-binding protein-interacting protein 4	2.46691e-14	0.889556	66568.5	PGLSPSSSIGSMASSEK	TRUE	_PGLS[Phospho]PSSSIGSM[Oxidation]ASSEK_.2	_PGLS[Phospho]PSSSIGSM[Oxidation]ASSEK_	_PGLS[+80]PSSSIGSM[+16]ASSEK_	FALSE		511825	488309		508646	432927	0.941446	0.537064		1.02042e-21	2.42841e-09		0.00023452	0.000334814		53.083	52.9091		53.1745	53.1042		0.991494	0.82125		0.999872	0.846251		19.7435	13.1013		22.7987	23.6784
A0A1I9LLC0	AT3G14010	CTC-interacting domain 4;CTC-interacting domain 4;Polyadenylate-binding protein-interacting protein 4	2.46691e-14	0.889556	66568.5	PGLSPSSSIGSMASSEK	TRUE	_PGLS[Phospho]PSSSIGSMASSEK_.2	_PGLS[Phospho]PSSSIGSMASSEK_	_PGLS[+80]PSSSIGSMASSEK_	FALSE	1.07305e+06	810815	1.02352e+06		1.02808e+06	1.19671e+06	1.14783	0.322933	0.0017406	0.000284973	3.49694e-18		6.76646e-13	2.45572e-12	68.833	69.22	69.2802		69.0269	69.3919	0.866946	0.853967	0.994773		0.999462	0.990547	15.2629	17.2728	17.1836		20.7447	15.9483
A0A1I9LLK5	AT3G60250	Casein kinase II subunit beta;Casein kinase II subunit beta;Casein kinase II subunit beta;Putative casein kinase II subunit beta-4;Casein kinase II subunit beta-3	6.09746e-07	0.863587	26650.6	SEILGGAIDR	TRUE	_S[Phospho]EILGGAIDR_.2	_S[Phospho]EILGGAIDR_	_S[+80]EILGGAIDR_	FALSE	2490605	4.04319e+06	3.61553e+06	3178184	2.38117e+06	2.18949e+06	0.763484	0.221592	0.00215782	0.000889788	0.00586982	3.41372e-21	2.8779e-12	8.58696e-12	64.277	64.5427	64.6756	64.186	64.4899	64.5781	1	1	1	1	1	1
A0A1I9LLR7	AT3G58620	Tetratricopetide-repeat thioredoxin-like 4;TPR repeat-containing thioredoxin TTL4	1.83215e-19	0.902785	71734.8	DSLSFQR	TRUE	_DSLS[Phospho]FQR_.2	_DSLS[Phospho]FQR_	_DSLS[+80]FQR_	FALSE		564432	612702	493963	561743	548898	0.908763	0.195062		1.76883e-09	3.80982e-18	2.34173e-14	4.67559e-09	3.97136e-09		50.0752	49.9913	50.0699	49.9985	49.9738		0.984179	0.994192	0.990874	0.99984	0.911268		5.13046	6.14278	5.68742	9.74232	3.32921
A0A1I9LLZ2	AT3G45190	SIT4 phosphatase-associated family protein	2.63449e-13	0.886752	83314.9	DSDDDEVHDR	TRUE	_DS[Phospho]DDDEVHDR_.2	_DS[Phospho]DDDEVHDR_	_DS[+80]DDDEVHDR_	FALSE	222320	261890	220172	195190	243660	219960	0.935304	0.479225	2.20308e-12	2.08237e-16	8.09377e-16	3.42612e-12	1.00673e-07	1.73795e-08	26.1843	25.7916	25.4961	26.5905	26.3949	25.8269	1	1	1	1	1	1
A0A1I9LLZ2	AT3G45190	SIT4 phosphatase-associated family protein	2.63449e-13	0.886752	83314.9	IPNGSSSSEGEISPR	TRUE	_IPNGSSSSEGEIS[Phospho]PR_.2	_IPNGSSSSEGEIS[Phospho]PR_	_IPNGSSSSEGEIS[+80]PR_	FALSE	6513687	7.1319e+06	8010713	8949280	8909032	9347042	1.25623	0.0154256	2.65532e-23	1.37412e-23	5.31712e-26	9.48272e-18	1.48067e-13	1.40332e-14	42.5227	42.6846	42.6686	42.6694	42.7645	42.7998	1	1	1	1	1	1	41.7146	38.7325	39.304	44.2546	47.8339	41.0834
A0A1I9LLZ2	AT3G45190	SIT4 phosphatase-associated family protein	2.63449e-13	0.886752	83314.9	SPPVPSLFGK	TRUE	_S[Phospho]PPVPSLFGK_.2	_S[Phospho]PPVPSLFGK_	_S[+80]PPVPSLFGK_	FALSE	16946522	15874757	13751543	12627659	12084476	12439180	0.797704	0.0299872	3.44983e-28	2.66725e-20	1.35126e-26	2.17109e-17	3.23105e-14	3.96508e-14	81.0844	81.4816	81.3663	81.1817	81.5386	81.5745	1	1	1	1	1	1	54.0064	56.3069	45.4015	47.0219	43.9964	48.6478
A0A1I9LLZ2	AT3G45190	SIT4 phosphatase-associated family protein	2.63449e-13	0.886752	83314.9	TRDSDDDEVHDR	TRUE	_TRDS[Phospho]DDDEVHDR_.2	_TRDS[Phospho]DDDEVHDR_	_TRDS[+80]DDDEVHDR_	FALSE	10495337	2.89444e+06	148362	11793801	10097374	189878	1.63103	0.582004	0.000190671	0.000856176	0.00305472	5.75302e-20	4.43602e-13	0.00217172	36.6655	36.349	36.5263	37.6745	37.0314	37.5866	1	0.99999	0.791888	1	0.999993	0.906348	61.6515	53.5117	2.33634	68.6792	55.5764	3.26983
A0A1I9LLZ2	AT3G45190	SIT4 phosphatase-associated family protein	2.63449e-13	0.886752	83314.9	TRDSDDDEVHDR	TRUE	_TRDS[Phospho]DDDEVHDR_.3	_TRDS[Phospho]DDDEVHDR_	_TRDS[+80]DDDEVHDR_	FALSE	14190823	4.42027e+06		18215826	16804172		1.88167	0.238371	2.32021e-09	0.00043836		9.23161e-24	1.12861e-15		36.7657	36.311		37.7287	37.0549		0.999999	0.999998		1	0.999998		45.4295	58.1873		64.9741	49.3374
A0A1I9LM16	AT3G02830	Zinc finger protein 1;Zinc finger CCCH domain-containing protein 33	7.2577e-20	0.903791	42074.1	ASFIASPR	TRUE	_ASFIAS[Phospho]PR_.2	_ASFIAS[Phospho]PR_	_ASFIAS[+80]PR_	FALSE	14159228	14123345	13049695	11517742	12177220	12028035	0.864288	0.0107931	5.10595e-44	1.16303e-35	1.11041e-40	3.11579e-24	1.46997e-19	1.38237e-20	51.6134	51.733	51.574	51.4962	51.7483	51.6474	1	1	1	1	1	1	23.9639	26.8987	25.014	21.0836	30.3164	24.6635
A0A1I9LM16	AT3G02830	Zinc finger protein 1;Zinc finger CCCH domain-containing protein 33	7.2577e-20	0.903791	42074.1	LSVSETR	TRUE	_LS[Phospho]VSETR_.2	_LS[Phospho]VSETR_	_LS[+80]VSETR_	FALSE	310730		407301	327721		272366	0.83574	0.400387	0.00259461		0.00661336	0.000559525		0.003534	37.4489		37.3108	37.7509		37.5555	0.769562		0.94978	0.973064		0.883168	3.57195		4.63295	5.46537		3.71593
A0A1I9LM37	AT3G21810	Zinc finger C-x8-C-x5-C-x3-H type family protein;Zinc finger CCCH domain-containing protein 40	5.12819e-34	0.934855	47769.3	DVGLDIVSDEETNGR	TRUE	_DVGLDIVS[Phospho]DEETNGR_.2	_DVGLDIVS[Phospho]DEETNGR_	_DVGLDIVS[+80]DEETNGR_	FALSE	3.81256e+06	3.3125e+06	3.55799e+06	2.9671e+06	2984174	2.70871e+06	0.810628	0.0164698	2.0292e-19	2.12388e-06	4.20307e-09	1.80279e-13	1.28284e-05	4.73527e-05	75.3433	75.5748	75.6708	75.3059	75.4605	75.7768	0.999965	1	1	0.999998	1	1	21.1968	25.8734	17.0912	19.9718	27.7058	19.4373
A0A1I9LM37	AT3G21810	Zinc finger C-x8-C-x5-C-x3-H type family protein;Zinc finger CCCH domain-containing protein 40	5.12819e-34	0.934855	47769.3	KAYDDDSV	TRUE	_KAYDDDS[Phospho]V_.2	_KAYDDDS[Phospho]V_	_KAYDDDS[+80]V_	FALSE	247662	218387	244785	124886	112144	154596	0.550938	0.00244547	0.00092106	0.000847365	0.000484924	0.000663869	0.000177677	0.000665849	35.7806	35.8625	35.2987	36.2364	35.9925	35.8717	0.998227	0.99688	0.999528	0.997037	0.986107	0.997998	7.33323	6.76675	8.65892	6.81871	5.26237	7.21163
A0A1I9LM51	AT3G59350	Protein kinase superfamily protein;Protein kinase superfamily protein;Protein kinase superfamily protein;PTI1-like tyrosine-protein kinase 3	2.54277e-13	0.886795	41231.9	EPPSIDVPALSLDELK	TRUE	_EPPS[Phospho]IDVPALSLDELK_.2	_EPPS[Phospho]IDVPALSLDELK_	_EPPS[+80]IDVPALSLDELK_	FALSE	2449882	3281960	4603256		2566515	2.4982e+06	0.735075	0.341727	4.78429e-06	1.09402e-23	1.06327e-27		1.30182e-15	5.9002e-13	107.886	108.249	108.092		108.398	108.744	0.999791	0.999987	0.999391		0.999315	0.999736	9.47497	12.2814	8.40252		8.28556	9.24066
A0A1I9LM51	AT3G59350	Protein kinase superfamily protein;Protein kinase superfamily protein;Protein kinase superfamily protein;PTI1-like tyrosine-protein kinase 3	2.54277e-13	0.886795	41231.9	SPAQFVR	TRUE	_S[Phospho]PAQFVR_.2	_S[Phospho]PAQFVR_	_S[+80]PAQFVR_	FALSE	194788	152802	213993	178961	169854	168678	0.92149	0.468232	0.000203079	0.000373293	0.000614936	0.000107843	0.000222491	0.000369918	46.9144	46.9268	46.6066	46.8062	47.0849	46.8005	1	1	1	1	1	1
A0A1I9LM66	AT3G28030	5'-3' exonuclease family protein;5'-3' exonuclease family protein;DNA repair protein UVH3	0.000281518	0.819748	168870	SNEGSPSENFEEVDEGR	TRUE	_S[Phospho]NEGS[Phospho]PSENFEEVDEGR_.2	_S[Phospho]NEGS[Phospho]PSENFEEVDEGR_	_S[+80]NEGS[+80]PSENFEEVDEGR_	FALSE	261665		268740	212090	236418	299593	0.94029	0.671084	0.00291243		2.8542e-06	0.000262908	0.000363838	2.92482e-09	64.802		64.7548	64.5417	64.5382	64.9186	0.927871		0.761472	0.957936	0.931218	0.953595	3.47351		1.78499	4.08068	3.52882	3.97295
A0A1I9LM90	AT3G04610	RNA-binding KH domain-containing protein;Flowering locus K homology domain	1.86668e-12	0.884337	60577.9	SEPEEDATVGGEEK	TRUE	_S[Phospho]EPEEDATVGGEEK_.2	_S[Phospho]EPEEDATVGGEEK_	_S[+80]EPEEDATVGGEEK_	FALSE	1.2003e+06	1.24976e+06	1.3629e+06	1629672	1.75308e+06	1.55442e+06	1.29484	0.0076132	0.000202915	0.000251355	4.01033e-26	0.000107851	6.22163e-11	0.000420442	38.1712	38.0707	38.0183	38.3501	38.168	38.1853	0.999999	1	0.999999	1	1	1	14.621	17.2381	15.1853	18.895	22.8682	16.3474
A0A1I9LMC7	AT3G22420	With no lysine (K) kinase 2;With no lysine (K) kinase 2;With no lysine (K) kinase 2;With no lysine (K) kinase 2;Serine/threonine-protein kinase WNK2	1.40708e-11	0.881709	73624.4	AISLPVDAVDM	TRUE	_AIS[Phospho]LPVDAVDM[Oxidation]_.2	_AIS[Phospho]LPVDAVDM[Oxidation]_	_AIS[+80]LPVDAVDM[+16]_	FALSE	235425		176273		215521	228535	1.0786	0.646602	0.00977722		0.00410776		0.00228847	0.00150406	88.3521		88.1227		88.1317	88.5652	1		1		1	1
A0A1I9LMD5	AT3G58760	Integrin-linked protein kinase family	2.1103e-20	0.905144	60432.2	QSSLAPESR	TRUE	_QSS[Phospho]LAPESR_.2	_QSS[Phospho]LAPESR_	_QSS[+80]LAPESR_	FALSE	2.46942e+06	2.29334e+06	3.37711e+06	2.05062e+06	2.19855e+06	2.36963e+06	0.813134	0.219073	3.86823e-35	1.54849e-14	5.19245e-23	3.44526e-20	3.18611e-11	5.76144e-17	30.6897	30.4852	30.2441	30.994	30.732	30.7059	0.856031	0.994711	0.999976	0.99993	0.999862	0.995294	27.4793	24.8764	24.248	25.4114	36.2012	30.668
A0A1I9LMF2	AT3G01670	Sieve element occlusion protein;Protein SIEVE ELEMENT OCCLUSION A	2.78287e-18	0.899773	96864.1	SLGPNSLGGR	TRUE	_SLGPNS[Phospho]LGGR_.2	_SLGPNS[Phospho]LGGR_	_SLGPNS[+80]LGGR_	FALSE	5.87057e+06	6.66492e+06	6.51371e+06	7.32079e+06	6875771	7.56786e+06	1.14254	0.0460365	2.25467e-19	4.38466e-13	8.12888e-40	5.95261e-11	2.09594e-21	1.34495e-22	46.2776	46.2865	46.1355	46.1911	46.411	46.2005	1	1	1	1	1	1	37.3944	31.1493	33.7186	31.4914	36.211	34.5663
A0A1I9LMI4	AT3G54230	Suppressor of abi3-5;SUPPRESSOR OF ABI3-5	2.68668e-17	0.897253	107426	SYDSEYER	TRUE	_S[Phospho]YDSEYER_.2	_S[Phospho]YDSEYER_	_S[+80]YDSEYER_	FALSE	219010	314213	378256	257031	323990	312362	0.980145	0.910961	1.2961e-05	1.1246e-13	1.60227e-19	1.27064e-08	6.72949e-10	8.89965e-09	39.5067	39.3601	39.1551	39.67	39.5958	39.3828	0.999974	0.9997	0.999968	0.999997	0.999989	0.999024	15.2442	17.6752	13.0179	16.8563	17.0805	15.2396
A0A1I9LMJ4	AT3G25070	RPM1 interacting protein 4;RPM1-interacting protein 4	3.3266e-21	0.907152	24904.1	ADESPEKVTVVPK	TRUE	_ADES[Phospho]PEKVTVVPK_.2	_ADES[Phospho]PEKVTVVPK_	_ADES[+80]PEKVTVVPK_	FALSE	6882752	5657808	5381327	8.31676e+06	7.51616e+06	6852420	1.26579	0.0642623	1.65682e-20	7.72351e-08	2.31701e-13	9.64691e-05	8.7331e-05	0.000741085	49.2591	49.5924	49.5074	49.5874	49.5464	49.6905	1	1	1	1	1	1	35.3996	34.3932	27.24	43.3861	46.4356	28.3998
A0A1I9LMJ4	AT3G25070	RPM1 interacting protein 4;RPM1-interacting protein 4	3.3266e-21	0.907152	24904.1	ASQNNSYDNKSPLHK	TRUE	_ASQNNSYDNKS[Phospho]PLHK_.3	_ASQNNSYDNKS[Phospho]PLHK_	_ASQNNSYDNKS[+80]PLHK_	FALSE	15726221	32305510	36802180	32484592	32195926	32986758	1.15128	0.541242	7.6825e-13	1.14438e-06	4.82534e-10	1.14142e-06	4.67492e-05	0.000430753	40.5087	40.7167	40.1584	41.0553	41.1206	41.1083	1	1	1	1	1	1	28.395	38.6947	34.5137	35.1533	42.3938	36.5273
A0A1I9LMJ4	AT3G25070	RPM1 interacting protein 4;RPM1-interacting protein 4	3.3266e-21	0.907152	24904.1	QFGDAGGSSNEAANK	TRUE	_QFGDAGGS[Phospho]SNEAANK_.2	_QFGDAGGS[Phospho]SNEAANK_	_QFGDAGGS[+80]SNEAANK_	FALSE		261411	295579	224814	237043	229556	0.82756	0.0381582		2.26211e-16	6.15555e-14	0.000107825	6.75859e-06	2.30727e-09		34.1311	33.7029	34.2464	34.1855	34.0649		0.999703	0.999596	0.9996	0.99955	0.999747		9.18016	8.81375	9.59732	17.2049	10.051
A0A1I9LMJ4	AT3G25070	RPM1 interacting protein 4;RPM1-interacting protein 4	3.3266e-21	0.907152	24904.1	SREESELK	TRUE	_S[Phospho]REESELK_.2	_S[Phospho]REESELK_	_S[+80]REESELK_	FALSE	39559292	39648696	57435484	43346156	44795640	47451664	0.992316	0.956743	4.06367e-44	5.71221e-29	5.03773e-38	1.6738e-29	1.30901e-24	9.74159e-25	31.352	30.8549	30.0584	32.1337	31.4245	31.1369	1	1	1	1	1	1	56.2401	56.3994	60.4146	56.8296	50.8908	55.2782
A0A1I9LMJ4	AT3G25070	RPM1 interacting protein 4;RPM1-interacting protein 4	3.3266e-21	0.907152	24904.1	SSGANVSGSSR	TRUE	_SSGANVS[Phospho]GSSR_.2	_SSGANVS[Phospho]GSSR_	_SSGANVS[+80]GSSR_	FALSE	438994		467446	435849	336692		0.85228	0.323813	5.23024e-06		8.45557e-12	2.15502e-10	9.65416e-06		16.1128		15.9822	15.901	15.8507		0.998789		0.999561	0.993251	0.844385		45.7142		35.6685	39.3719	11.3647
A0A1I9LMJ4	AT3G25070	RPM1 interacting protein 4;RPM1-interacting protein 4	3.3266e-21	0.907152	24904.1	TPTHQSSR	TRUE	_T[Phospho]PTHQSSR_.2	_T[Phospho]PTHQSSR_	_T[+80]PTHQSSR_	FALSE	20335764	20951688	26776914	21095744	4499794	23983800	0.728418	0.390743	2.17081e-26	3.29948e-23	4.01377e-28	6.15704e-23	1.63727e-05	7.43288e-15	11.1725	10.8943	10.2011	10.7015	11.4432	11.3163	1	1	1	1	1	1	48.8932	58.1281	58.0825	61.3476	65.2586	49.4806
A0A1I9LMR0	AT3G51250	Senescence/dehydration-associated protein-like protein;Senescence/dehydration-associated protein At3g51250	4.34454e-07	0.864371	40986.2	GQGSGSDSDDEQGQK	TRUE	_GQGS[Phospho]GS[Phospho]DS[Phospho]DDEQGQK_.2	_GQGS[Phospho]GS[Phospho]DS[Phospho]DDEQGQK_	_GQGS[+80]GS[+80]DS[+80]DDEQGQK_	FALSE	910412	741962	1.35913e+06	601509	429496	496993	0.507387	0.0606248	2.05504e-11	6.93235e-11	5.00341e-18	5.72721e-10	4.62023e-08	0.000570213	12.984	12.73	12.7787	12.9862	12.9681	12.9987	1	1	1	1	1	1
A0A1I9LMR0	AT3G51250	Senescence/dehydration-associated protein-like protein;Senescence/dehydration-associated protein At3g51250	4.34454e-07	0.864371	40986.2	GQGSGSDSDDEQGQK	TRUE	_GQGSGSDS[Phospho]DDEQGQK_.2	_GQGSGSDS[Phospho]DDEQGQK_	_GQGSGSDS[+80]DDEQGQK_	FALSE	271280	326870	383789	229008	193421	239680	0.674287	0.0393627	1.87293e-07	2.78996e-08	2.74926e-20	0.000107579	0.000114494	2.79711e-08	13.2737	13.371	13.2812	13.5474	13.4483	13.403	0.928977	0.9546	0.989295	0.991448	0.997227	0.988857	13.1845	9.92216	10.3308	14.8346	12.6783	14.8981
A0A1I9LMT6	AT3G12640	RNA binding (RRM/RBD/RNP motifs) family protein	4.30862e-11	0.880197	69581.1	GSADLVDDR	TRUE	_[Acetyl (Protein N-term)]GS[Phospho]ADLVDDR_.2	_[Acetyl (Protein N-term)]GS[Phospho]ADLVDDR_	_[+42]GS[+80]ADLVDDR_	FALSE	123493	177581	41107.9	81244.8	77213.2		0.694621	0.545442	0.00747364	0.00481339	0.00346505	0.00628291	0.00209509		51.6373	51.3426	51.4444	51.2286	51.2505		1	1	1	1	1
A0A1I9LMT6	AT3G12640	RNA binding (RRM/RBD/RNP motifs) family protein	4.30862e-11	0.880197	69581.1	GSADLVDDR	TRUE	_GS[Phospho]ADLVDDR_.2	_GS[Phospho]ADLVDDR_	_GS[+80]ADLVDDR_	FALSE	746393	757374	805147	842803	854884	892571	1.12185	0.0161405	1.45779e-22	1.91807e-21	9.25836e-23	1.44248e-15	1.29096e-15	2.9868e-15	40.0074	39.9074	39.5794	40.0324	40.0661	39.8534	1	1	1	1	1	1
A0A1I9LMT6	AT3G12640	RNA binding (RRM/RBD/RNP motifs) family protein	4.30862e-11	0.880197	69581.1	ISHSTGSETLDQNMVLGEVSPK	TRUE	_ISHSTGSETLDQNM[Oxidation]VLGEVS[Phospho]PK_.3	_ISHSTGSETLDQNM[Oxidation]VLGEVS[Phospho]PK_	_ISHSTGSETLDQNM[+16]VLGEVS[+80]PK_	FALSE	1.37182e+06	848676	117477	1.02848e+06	384440	375437	0.764917	0.68737	1.72292e-08	1.88288e-12	0.00167042	0.000107826	9.96697e-10	0.00193807	68.2661	69.1461	69.7458	68.8673	69.3532	70.356	1	0.998506	0.996347	1	0.999996	0.995903	33.1101	20.5518	15.8595	29.1363	21.3152	21.8267
A0A1I9LMT6	AT3G12640	RNA binding (RRM/RBD/RNP motifs) family protein	4.30862e-11	0.880197	69581.1	ISHSTGSETLDQNMVLGEVSPK	TRUE	_ISHSTGSETLDQNMVLGEVS[Phospho]PK_.3	_ISHSTGSETLDQNMVLGEVS[Phospho]PK_	_ISHSTGSETLDQNMVLGEVS[+80]PK_	FALSE	968337	1.23232e+06	1.12914e+06	1.75829e+06	1.85363e+06	1.50817e+06	1.53766	0.00970265	0.00020727	0.000993449	1.04766e-11	0.000107827	0.000185259	1.04575e-06	78.8648	80.1594	81.0944	79.3512	80.4634	81.1332	0.999928	0.999967	1	1	1	1	14.2289	12.9246	18.2253	20.1523	22.99	17.1207
A0A1I9LMT6	AT3G12640	RNA binding (RRM/RBD/RNP motifs) family protein	4.30862e-11	0.880197	69581.1	RSPSPQAQSQR	TRUE	_RS[Phospho]PS[Phospho]PQAQSQR_.2	_RS[Phospho]PS[Phospho]PQAQSQR_	_RS[+80]PS[+80]PQAQSQR_	FALSE	1.76893e+06	1.90904e+06	2.86683e+06	2.02291e+06	2.17878e+06	2.36691e+06	1.00364	0.983431	4.65968e-17	9.08869e-13	0.000291769	2.30544e-17	8.69442e-11	0.000256432	18.437	18.581	18.1889	18.8577	18.7913	18.248	1	0.999998	1	1	1	1	23.2249	14.1011	25.9639	15.6022	29.7605	24.607
A0A1I9LMT6	AT3G12640	RNA binding (RRM/RBD/RNP motifs) family protein	4.30862e-11	0.880197	69581.1	SPSPQAQSQR	TRUE	_S[Phospho]PS[Phospho]PQAQSQR_.2	_S[Phospho]PS[Phospho]PQAQSQR_	_S[+80]PS[+80]PQAQSQR_	FALSE	1.95317e+06	2.32702e+06	3.00749e+06	2121671	2606657	2.33924e+06	0.969796	0.839234	8.13933e-21	1.13243e-15	1.45386e-15	5.35975e-16	6.17226e-10	5.01505e-11	18.3743	18.0694	18.0624	18.0831	18.0897	18.0609	1	1	1	1	1	1	29.2529	26.1146	35.0075	34.8781	37.8185	38.7681
A0A1I9LMT6	AT3G12640	RNA binding (RRM/RBD/RNP motifs) family protein	4.30862e-11	0.880197	69581.1	SVVSTSTQNSSDPDPAR	TRUE	_S[Phospho]VVSTSTQNSSDPDPAR_.2	_S[Phospho]VVSTSTQNSSDPDPAR_	_S[+80]VVSTSTQNSSDPDPAR_	FALSE	86336.6	78709.5	108810	143222	128824	162310	1.58607	0.01565	0.00326635	0.000610968	0.000201753	2.54901e-10	0.00158759	0.000332419	40.2225	40.2152	39.9638	40.14	40.2969	40.1765	0.756726	0.9109	0.777421	0.994914	0.975901	0.901131	4.20915	5.47583	4.04246	9.1756	9.14873	5.22777
A0A1I9LMW1	AT3G16560	Protein phosphatase 2C family protein;Probable protein phosphatase 2C 40	3.6955e-07	0.864736	49558.3	KVPSSPALSK	TRUE	_KVPS[Phospho]SPALSK_.2	_KVPS[Phospho]SPALSK_	_KVPS[+80]SPALSK_	FALSE	2.61585e+06	3.24095e+06	3.46418e+06		3537878	3.73886e+06	1.17103	0.212132	2.20975e-06	9.49711e-18	2.27102e-24		2.25382e-11	1.53914e-13	42.0207	42.2165	41.6698		42.4505	42.24	0.996385	0.989883	0.998444		0.954971	0.949984	17.7753	34.6095	34.2663		39.7688	41.0426
A0A1I9LMZ1	AT3G27960	Tetratricopeptide repeat (TPR)-like superfamily protein;Protein KINESIN LIGHT CHAIN-RELATED 2	1.25556e-23	0.913018	64801.5	ASFISYGAESR	TRUE	_AS[Phospho]FIS[Phospho]YGAESR_.2	_AS[Phospho]FIS[Phospho]YGAESR_	_AS[+80]FIS[+80]YGAESR_	FALSE	795057	840714	735897		456138	375851	0.526205	0.00472908	2.7376e-33	2.02351e-21	2.59398e-25		5.18234e-10	5.97247e-11	66.7737	66.593	66.6826		66.5705	66.6126	0.90564	0.95609	0.996321		0.98592	0.939973	17.1431	14.9081	24.2624		19.2224	17.2283
A0A1I9LMZ1	AT3G27960	Tetratricopeptide repeat (TPR)-like superfamily protein;Protein KINESIN LIGHT CHAIN-RELATED 2	1.25556e-23	0.913018	64801.5	DDSALQASPR	TRUE	_DDSALQAS[Phospho]PR_.2	_DDSALQAS[Phospho]PR_	_DDSALQAS[+80]PR_	FALSE	1.28551e+06	1409104	1589039	1.17334e+06	1.32308e+06	1.32952e+06	0.893151	0.208419	2.44628e-24	3.50735e-15	7.26192e-25	2.3465e-16	3.94654e-11	2.59393e-14	33.5597	33.4698	33.1185	33.663	33.4161	33.3883	1	1	1	1	1	1	27.2836	28.5215	25.6589	24.1526	31.7945	26.3464
A0A1I9LMZ1	AT3G27960	Tetratricopeptide repeat (TPR)-like superfamily protein;Protein KINESIN LIGHT CHAIN-RELATED 2	1.25556e-23	0.913018	64801.5	KSPDLGK	TRUE	_KS[Phospho]PDLGK_.2	_KS[Phospho]PDLGK_	_KS[+80]PDLGK_	FALSE	535163	522721	257241	490798	522809	544358	1.18465	0.428458	0.000206664	0.00176731	5.6334e-05	8.05466e-07	0.000870245	0.00506262	24.1188	24.0657	22.7229	24.1198	23.9118	22.9399	1	1	1	1	1	1
A0A1I9LMZ1	AT3G27960	Tetratricopeptide repeat (TPR)-like superfamily protein;Protein KINESIN LIGHT CHAIN-RELATED 2	1.25556e-23	0.913018	64801.5	VKDDSALQASPR	TRUE	_VKDDS[Phospho]ALQAS[Phospho]PR_.2	_VKDDS[Phospho]ALQAS[Phospho]PR_	_VKDDS[+80]ALQAS[+80]PR_	FALSE	408044	534506	598192	564663	537098	538908	1.06486	0.587721	9.12992e-09	1.32978e-09	7.12519e-06	6.29319e-05	0.000424092	2.61373e-08	35.615	35.6353	35.1169	35.8867	35.7809	35.6756	1	1	1	1	1	1
A0A1I9LMZ1	AT3G27960	Tetratricopeptide repeat (TPR)-like superfamily protein;Protein KINESIN LIGHT CHAIN-RELATED 2	1.25556e-23	0.913018	64801.5	VKDDSALQASPR	TRUE	_VKDDSALQAS[Phospho]PR_.2	_VKDDSALQAS[Phospho]PR_	_VKDDSALQAS[+80]PR_	FALSE	1.27228e+06	1.3453e+06	1.55589e+06	1.23056e+06	1.33997e+06	1.37102e+06	0.94443	0.461867	2.14984e-15	1.21498e-24	1.50211e-21	6.11019e-12	1.91983e-05	7.64521e-15	39.0055	38.705	38.1303	39.3686	39.1405	38.7124	0.999936	0.999992	1	1	1	1	16.3788	21.6353	30.9511	26.9137	33.0347	30.2518
A0A1I9LN40	AT3G44530	Protein HIRA	0.00022164	0.831942	96914.5	AASDVQQNQVTTK	TRUE	_AAS[Phospho]DVQQNQVTTK_.2	_AAS[Phospho]DVQQNQVTTK_	_AAS[+80]DVQQNQVTTK_	FALSE	35746.3	54606.2	71498	46337.1	62472.2	92389.5	1.24311	0.48318	0.000185731	0.000359409	2.78526e-06	0.000681685	9.29401e-07	0.0002784	31.1837	30.9641	31.157	31.6119	31.1335	31.3381	0.999972	0.992215	0.999785	0.99459	0.999908	0.999925	12.189	6.54091	10.14	6.90716	10.9898	11.1951
A0A1I9LN40	AT3G44530	Protein HIRA	0.00022164	0.831942	96914.5	GDSGDFPVEISNR	TRUE	_GDS[Phospho]GDFPVEISNR_.2	_GDS[Phospho]GDFPVEISNR_	_GDS[+80]GDFPVEISNR_	FALSE	1.61671e+06	366135	259833	678708	280537	174895	0.505707	0.468511	2.0061e-12	0.000573611	0.000215266	0.000107836	0.000599707	0.0004818	72.0702	72.2758	72.3806	72.0377	72.3293	72.5365	1	0.999998	0.99997	0.999998	0.999874	0.997478	15.5173	14.3742	11.4107	14.0005	9.978	6.98019
A0A1I9LN40	AT3G44530	Protein HIRA	0.00022164	0.831942	96914.5	VSSPVNQK	TRUE	_VSS[Phospho]PVNQK_.2	_VSS[Phospho]PVNQK_	_VSS[+80]PVNQK_	FALSE	169321		215328	111623	162121	189122	0.80223	0.344362	0.00114233		2.0444e-06	5.24191e-09	5.62969e-05	0.000341386	16.8404		16.723	16.6891	16.5908	16.7578	0.916043		0.999406	0.916673	0.958597	0.999101	3.38976		8.42758	3.39798	4.14212	8.01373
A0A1I9LN46	AT3G51150	Kinesin-like protein;Kinesin-like protein KIN-7G	8.65803e-25	0.915694	101994	DPTHQDFVTPSPEK	TRUE	_DPTHQDFVTPS[Phospho]PEK_.2	_DPTHQDFVTPS[Phospho]PEK_	_DPTHQDFVTPS[+80]PEK_	FALSE	696290	430029		731088	579843		1.16391	0.607848	0.00463054	0.00164322		0.00664327	0.00014258		53.2993	53.6495		53.3505	53.6795		0.757767	0.981997		0.990816	0.988106		3.31028	5.69219		6.62551	6.11289
A0A1I9LN46	AT3G51150	Kinesin-like protein;Kinesin-like protein KIN-7G	8.65803e-25	0.915694	101994	LESELSSPR	TRUE	_LESELSS[Phospho]PR_.2	_LESELSS[Phospho]PR_	_LESELSS[+80]PR_	FALSE	1.40929e+06	529502	603833	3.25812e+06	1442186	819531	2.17092	0.274218	1.62109e-14	1.80482e-07	5.11248e-37	4.18762e-19	2.54646e-09	2.60323e-14	41.4239	41.5709	41.2297	41.54	41.7436	41.6093	0.998097	0.953423	0.999999	0.999774	0.998356	0.999991	13.6558	16.4382	16.4147	18.3948	17.279	19.9943
A0A1I9LN68	AT3G49210	Diacylglycerol O-acyltransferase	6.45508e-13	0.885657	48929.7	KDDEEEVEEEQPLSPAAR	TRUE	_KDDEEEVEEEQPLS[Phospho]PAAR_.3	_KDDEEEVEEEQPLS[Phospho]PAAR_	_KDDEEEVEEEQPLS[+80]PAAR_	FALSE	561148	586436		340835	774707	449247	0.909034	0.777095	1.26425e-49	0.00290212		0.000263595	0.00474804	0.00339504	57.774	58.2182		57.9009	58.5977	59.5454	1	1		1	1	1
A0A1I9LNC1	AT3G24080	KRR1 family protein	2.02529e-20	0.90519	73758.5	AEGNESGEDDDFLR	TRUE	_AEGNES[Phospho]GEDDDFLR_.2	_AEGNES[Phospho]GEDDDFLR_	_AEGNES[+80]GEDDDFLR_	FALSE	4.13283e+06	4.52374e+06	4107694	3.97515e+06	4444523	4.16201e+06	0.985696	0.76678	1.64328e-38	1.78668e-38	6.31107e-23	2.54687e-20	4.92893e-13	1.07648e-15	63.6541	63.7508	63.6369	63.5945	63.7747	63.7397	1	1	1	1	1	1
A0A1I9LNR0	AT3G11720	Polyketide cyclase/dehydrase and lipid transport superfamily protein;Polyketide cyclase/dehydrase and lipid transport superfamily protein;At3g11720	5.53887e-21	0.906594	50752.7	FCISPEVK	TRUE	_FC[Carbamidomethyl]IS[Phospho]PEVK_.2	_FC[Carbamidomethyl]IS[Phospho]PEVK_	_FC[+57]IS[+80]PEVK_	FALSE	1229200	1.03412e+06	1.25045e+06	1.02575e+06	904257	858943	0.793718	0.0466979	1.21068e-12	1.35332e-25	7.94512e-22	1.40511e-14	8.77086e-19	2.89745e-08	65.0126	65.3861	65.2737	64.9215	65.3483	65.529	1	1	1	1	1	1
A0A1I9LNR0	AT3G11720	Polyketide cyclase/dehydrase and lipid transport superfamily protein;Polyketide cyclase/dehydrase and lipid transport superfamily protein;At3g11720	5.53887e-21	0.906594	50752.7	IAPASPEIDLTTNSEVTR	TRUE	_IAPAS[Phospho]PEIDLTTNSEVTR_.2	_IAPAS[Phospho]PEIDLTTNSEVTR_	_IAPAS[+80]PEIDLTTNSEVTR_	FALSE	782958	502552	165312		758665	376511	1.17365	0.776887	1.06014e-06	3.91822e-39	0.000908705		1.46854e-06	6.85676e-13	75.142	75.497	76.2854		75.4905	75.6374	0.999912	0.999841	0.998183		0.996669	0.999937	11.8304	11.158	9.49798		8.0874	12.3175
A0A1I9LNZ7	AT3G61670	Extra-large G-like protein, putative (DUF3133);Extra-large G-like protein, putative (DUF3133)	6.06323e-09	0.872672	85362.6	EADSVSVK	TRUE	_EADSVS[Phospho]VK_.2	_EADSVS[Phospho]VK_	_EADSVS[+80]VK_	FALSE	406792	397356	560187	451863	519358	512219	1.0873	0.524122	6.79235e-18	7.24268e-14	3.31297e-18	3.89885e-12	0.000150328	6.98272e-07	30.1741	30.0151	29.5234	30.339	30.2006	30.0665	0.999241	0.999988	0.999925	0.999846	0.999108	0.988329	8.18226	12.309	10.4928	9.77631	8.02171	5.43894
A0A1I9LNZ7	AT3G61670	Extra-large G-like protein, putative (DUF3133);Extra-large G-like protein, putative (DUF3133)	6.06323e-09	0.872672	85362.6	SVEDTAKPVSASSPEK	TRUE	_S[Phospho]VEDTAKPVSAS[Phospho]S[Phospho]PEK_.2	_S[Phospho]VEDTAKPVSAS[Phospho]S[Phospho]PEK_	_S[+80]VEDTAKPVSAS[+80]S[+80]PEK_	FALSE	792437	796669	954708	974166	984913	955988	1.14594	0.0839439	6.87414e-31	2.08858e-09	4.12857e-26	1.9277e-09	3.25255e-10	1.07812e-08	38.443	38.1273	38.3825	38.2532	38.0863	38.242	0.919114	0.99777	0.999212	0.999383	0.999956	0.946535	30.7912	36.1632	46.0344	43.4104	43.9962	33.9134
A0A1I9LNZ7	AT3G61670	Extra-large G-like protein, putative (DUF3133);Extra-large G-like protein, putative (DUF3133)	6.06323e-09	0.872672	85362.6	SVEDTAKPVSASSPEK	TRUE	_SVEDTAKPVSAS[Phospho]S[Phospho]PEK_.2	_SVEDTAKPVSAS[Phospho]S[Phospho]PEK_	_SVEDTAKPVSAS[+80]S[+80]PEK_	FALSE	541808	591738	706214	626873	709411	702847	1.10837	0.296534	5.07753e-09	8.7425e-09	2.41826e-14	2.38389e-07	2.39059e-05	5.13042e-08	37.8543	37.8459	37.7011	37.9718	37.8972	37.8685	0.997834	0.999006	0.999999	0.999998	1	0.999825	47.0688	48.8848	56.9928	58.8386	63.1571	59.5027
A0A1I9LP61	AT3G19570	SNOWY COTYLEDON protein (DUF566);Protein SNOWY COTYLEDON 3	0.000299055	0.812752	65197.3	YPSPLLSR	TRUE	_YPS[Phospho]PLLSR_.2	_YPS[Phospho]PLLSR_	_YPS[+80]PLLSR_	FALSE	53338.7	60853.6	52691.9	67755.6		105930	1.56113	0.122477	7.71816e-12	0.00178051	0.00254992	0.000176973		0.00209057	61.6734	62.1385	62.2531	61.9074		62.019	0.998298	0.882011	0.991377	0.989323		0.985269	8.13594	8.7996	8.83606	8.66147		7.45083
A0A1I9LPC2	AT3G07980	Mitogen-activated protein kinase kinase kinase 6;Mitogen-activated protein kinase kinase kinase 6;MAP3K epsilon protein kinase 2	6.19971e-20	0.903965	148931	LPVIGGASFR	TRUE	_LPVIGGAS[Phospho]FR_.2	_LPVIGGAS[Phospho]FR_	_LPVIGGAS[+80]FR_	FALSE	285375	151925	109030	207334	190081	156808	1.01445	0.964225	0.000245331	1.0188e-05	0.00181893	0.000161296	0.000172645	0.000382359	84.6966	85.4079	85.6533	84.8533	85.3247	85.7755	1	1	1	1	1	1
A0A1I9LPC2	AT3G07980	Mitogen-activated protein kinase kinase kinase 6;Mitogen-activated protein kinase kinase kinase 6;MAP3K epsilon protein kinase 2	6.19971e-20	0.903965	148931	SGQLDPNNPIFSQR	TRUE	_S[Phospho]GQLDPNNPIFSQR_.2	_S[Phospho]GQLDPNNPIFSQR_	_S[+80]GQLDPNNPIFSQR_	FALSE	996862	1101583	844566	1.24203e+06	1.117e+06	924154	1.11559	0.393927	2.72693e-35	1.92777e-23	5.71127e-28	1.01499e-20	1.22275e-13	4.87103e-13	75.0878	75.4889	75.4311	75.0659	75.3286	75.5832	0.999994	1	1	0.999945	1	1	13.0083	16.4134	17.6922	10.8079	18.4718	20.5061
A0A1I9LPE6	AT3G59770	SacI homology domain-containing protein / WW domain-containing protein;SacI homology domain-containing protein / WW domain-containing protein;SacI homology domain-containing protein / WW domain-containing protein;Probable phosphoinositide phosphatase SAC9	0.000107792	0.843364	157714	RASFGATIENDPCIHAK	TRUE	_RAS[Phospho]FGATIENDPC[Carbamidomethyl]IHAK_.3	_RAS[Phospho]FGATIENDPC[Carbamidomethyl]IHAK_	_RAS[+80]FGATIENDPC[+57]IHAK_	FALSE	328954	487855	128956	1.18003e+06	657629	211809	2.167	0.285165	2.49603e-24	6.9142e-09	7.96182e-09	0.000309631	3.05117e-05	0.00116322	80.624	83.3371	85.5803	81.4008	84.8488	85.2077	0.979448	0.989238	0.971939	0.95916	0.87725	0.913233	4.86405	5.52095	4.5449	4.15641	2.96665	3.35377
A0A1I9LPJ2	AT3G43810	Calmodulin;Calmodulin;Calmodulin-2;Calmodulin-3;Calmodulin-7;Calmodulin-6;Calmodulin-5	1.40855e-22	0.910521	24564.8	ADQLTDDQISEFK	TRUE	_[Acetyl (Protein N-term)]ADQLTDDQIS[Phospho]EFK_.2	_[Acetyl (Protein N-term)]ADQLTDDQIS[Phospho]EFK_	_[+42]ADQLTDDQIS[+80]EFK_	FALSE	407776	331260	310271	253578	212259	215968	0.649768	0.0194923	2.32849e-05	3.97778e-13	1.45219e-17	8.61439e-12	5.75868e-09	9.05114e-10	89.171	89.0943	88.8343	89.048	89.0112	89.3982	0.998598	0.999936	0.997832	0.986223	0.998515	0.998929	8.52521	10.6499	7.1317	5.27088	7.51058	7.83829
A0A1I9LPP9	AT3G48430	Relative of early flowering 6;Lysine-specific demethylase REF6	5.13563e-25	0.916217	112655	DTQETLSDAER	TRUE	_DTQETLS[Phospho]DAER_.2	_DTQETLS[Phospho]DAER_	_DTQETLS[+80]DAER_	FALSE	312786	322361	394111	345785	297698	336358	0.951988	0.607298	2.57114e-27	2.37444e-16	1.17519e-21	3.63299e-15	5.27674e-12	1.04223e-08	43.1691	43.162	43.1154	43.377	43.2106	43.2	0.999996	0.998848	1	0.99998	0.999997	1	14.1201	14.7976	19.6922	13.2515	20.3253	18.3523
A0A1I9LPP9	AT3G48430	Relative of early flowering 6;Lysine-specific demethylase REF6	5.13563e-25	0.916217	112655	EFESDDEVSDR	TRUE	_EFES[Phospho]DDEVS[Phospho]DR_.2	_EFES[Phospho]DDEVS[Phospho]DR_	_EFES[+80]DDEVS[+80]DR_	FALSE	2.91962e+06	2902212	3.19051e+06	3.07855e+06	3.1968e+06	3286272	1.06095	0.174515	1.53954e-20	1.49006e-17	9.92939e-24	2.56007e-18	1.31946e-10	3.20215e-14	45.1904	44.7374	44.9692	44.9513	44.8626	44.8518	1	1	1	1	1	1
A0A1I9LPP9	AT3G48430	Relative of early flowering 6;Lysine-specific demethylase REF6	5.13563e-25	0.916217	112655	SLGEEYTVR	TRUE	_S[Phospho]LGEEYTVR_.2	_S[Phospho]LGEEYTVR_	_S[+80]LGEEYTVR_	FALSE	3.20673e+06	2795099	3.16467e+06	3.40654e+06	2.58814e+06	3167682	0.999548	0.996244	2.58027e-34	2.94071e-22	4.41858e-28	1.06771e-20	5.45091e-17	9.50059e-17	54.9414	55.2622	55.2287	55.054	55.1989	55.2816	1	1	1	1	1	1	36.1454	32.9409	38.4158	35.5058	36.747	39.5885
A0A1I9LPP9	AT3G48430	Relative of early flowering 6;Lysine-specific demethylase REF6	5.13563e-25	0.916217	112655	SSPVASSPSKPK	TRUE	_SSPVASS[Phospho]PSKPK_.2	_SSPVASS[Phospho]PSKPK_	_SSPVASS[+80]PSKPK_	FALSE		2.28994e+06	2378038	1.86637e+06	2369086		0.907343	0.485979		8.8843e-13	5.00337e-16	3.63493e-13	2.38029e-08			26.9547	26.4604	27.2276	27.0477			0.999675	0.995445	0.999857	0.999902			51.8755	49.2413	50.7548	63.5605
A0A1I9LPP9	AT3G48430	Relative of early flowering 6;Lysine-specific demethylase REF6	5.13563e-25	0.916217	112655	TSTTSPTIAHK	TRUE	_TSTTS[Phospho]PTIAHK_.2	_TSTTS[Phospho]PTIAHK_	_TSTTS[+80]PTIAHK_	FALSE		1.36589e+06	2039380	1.59641e+06	1.77736e+06	1.59623e+06	0.973004	0.872301		1.25232e-09	3.50741e-13	2.88283e-11	6.09104e-06	6.57225e-14		31.1278	30.7807	32.0369	31.4508	31.3786		0.997255	0.988345	0.99851	0.999679	0.99987		14.1092	16.6312	10.8513	18.8126	24.1614
A0A1I9LPQ1	AT3G07420	Asparaginyl-tRNA synthetase 2;Asparagine--tRNA ligase, cytoplasmic 2	1.03672e-28	0.924323	60698.8	DTYLTASGR	TRUE	_DTYLTAS[Phospho]GR_.2	_DTYLTAS[Phospho]GR_	_DTYLTAS[+80]GR_	FALSE	2.46321e+06	2.39569e+06	2.70723e+06	2.02916e+06	2.05159e+06	2273102	0.839776	0.0299914	5.67679e-29	2.71274e-26	1.68879e-29	4.02566e-17	1.71591e-13	3.22911e-15	44.9892	44.8129	44.7526	45.0115	44.9997	44.8199	0.999986	1	1	1	0.988449	1	20.918	20.6644	30.9707	22.4829	9.54053	25.994
A0A1I9LPZ1	AT3G50370	Uncharacterized protein	1.6358e-45	0.954654	236760	DGSFGFPDR	TRUE	_DGS[Phospho]FGFPDR_.2	_DGS[Phospho]FGFPDR_	_DGS[+80]FGFPDR_	FALSE	248141	142352	106164	313319	257156	302480	1.75766	0.0524152	1.21935e-28	0.000117213	0.000422697	2.62714e-18	0.000311177	0.000202109	69.1198	69.307	69.5524	69.0742	69.1447	69.5403	1	1	1	1	1	1
A0A1I9LPZ1	AT3G50370	Uncharacterized protein	1.6358e-45	0.954654	236760	NPLSPNSGQANLK	TRUE	_NPLS[Phospho]PNSGQANLK_.2	_NPLS[Phospho]PNSGQANLK_	_NPLS[+80]PNSGQANLK_	FALSE	8.1987e+06	7.4192e+06	7.06517e+06	7.34113e+06	7.6167e+06	8.32233e+06	1.02632	0.677418	2.29941e-33	3.81373e-27	4.68336e-33	1.76473e-16	1.08053e-05	2.84765e-18	50.9599	51.0947	51.1655	50.8582	51.0485	51.1164	1	1	1	1	1	1	30.9218	28.3895	19.7252	35.7771	29.5612	23.8232
A0A1I9LPZ1	AT3G50370	Uncharacterized protein	1.6358e-45	0.954654	236760	PASSGIGWSK	TRUE	_PAS[Phospho]SGIGWSK_.2	_PAS[Phospho]SGIGWSK_	_PAS[+80]SGIGWSK_	FALSE	508769	576114		480414		534064	0.935104	0.499459	0.000112331	0.0001023		9.06106e-06		0.000217067	51.7754	51.9871		51.7502		51.8247	0.80082	0.866509		0.78804		0.979504	21.5286	13.517		16.4785		17.3827
A0A1I9LPZ1	AT3G50370	Uncharacterized protein	1.6358e-45	0.954654	236760	SSLTQVRPVSGGGR	TRUE	_SSLTQVRPVS[Phospho]GGGR_.2	_SSLTQVRPVS[Phospho]GGGR_	_SSLTQVRPVS[+80]GGGR_	FALSE	4.93432e+06	4.05685e+06	3.89715e+06	5.49725e+06	4628999	3.62625e+06	1.06705	0.670957	3.73124e-48	8.74044e-34	8.17055e-20	1.90457e-29	4.79023e-12	0.000297004	47.3415	47.812	47.6154	47.6236	47.9971	48.2785	0.99997	0.999976	0.997006	1	1	0.999999	14.3772	14.1639	12.1277	23.6805	18.8862	15.653
A0A1I9LPZ1	AT3G50370	Uncharacterized protein	1.6358e-45	0.954654	236760	VFEQQGIEAPSDDDDFIEVR	TRUE	_VFEQQGIEAPS[Phospho]DDDDFIEVR_.2	_VFEQQGIEAPS[Phospho]DDDDFIEVR_	_VFEQQGIEAPS[+80]DDDDFIEVR_	FALSE	11646233	10636029	9675650	11357599	11571237	9933730	1.02831	0.714148	5.82638e-21	6.68358e-13	6.77358e-05	5.8539e-18	1.50084e-09	4.69543e-14	91.7196	92.2035	91.9655	91.9226	92.1676	92.5063	1	1	1	1	1	1
A0A1I9LPZ1	AT3G50370	Uncharacterized protein	1.6358e-45	0.954654	236760	VFEQQGIEAPSDDDDFIEVR	TRUE	_VFEQQGIEAPS[Phospho]DDDDFIEVR_.3	_VFEQQGIEAPS[Phospho]DDDDFIEVR_	_VFEQQGIEAPS[+80]DDDDFIEVR_	FALSE	10085916	9613749	8780985	9259918	9647525	8.29351e+06	0.955068	0.484722	6.75941e-15	6.42003e-10	1.7388e-14	4.13526e-10	3.80847e-07	2.28407e-12	91.7038	92.231	92.033	91.8882	92.1302	92.5462	1	1	1	1	1	1
A0A1I9LPZ1	AT3G50370	Uncharacterized protein	1.6358e-45	0.954654	236760	VSSPLQNEGANHNNYGAR	TRUE	_VSS[Phospho]PLQNEGANHNNYGAR_.3	_VSS[Phospho]PLQNEGANHNNYGAR_	_VSS[+80]PLQNEGANHNNYGAR_	FALSE	5701459	5448648	6029057	6369838	6014392	5.52348e+06	1.04241	0.459973	4.85676e-08	6.6782e-10	5.99576e-26	3.12818e-21	1.7071e-11	2.82381e-09	44.7656	44.6507	44.7902	44.788	44.8528	44.8421	0.813979	0.976462	0.842375	0.816653	0.937578	0.845689	37.0917	51.387	41.6333	46.1036	46.8673	44.4629
A0A1I9LPZ9	AT3G03380	DegP protease 7;Protease Do-like 7	5.75795e-05	0.847925	116291	LGSQASMATESVMK	TRUE	_LGS[Phospho]QASMATESVMK_.2	_LGS[Phospho]QASMATESVMK_	_LGS[+80]QASMATESVMK_	FALSE	113621	164814	147631	373128	337907	328312	2.4394	0.000546432	0.00224344	9.504e-06	7.33538e-09	0.000326826	5.5986e-12	7.44905e-12	68.6463	69.0334	69.1242	68.7548	68.8403	69.1438	0.959438	0.994429	0.989614	0.998512	0.999445	0.999608	5.26214	7.91537	7.77753	8.60771	15.6791	11.2073
A0A1I9LQ09	AT3G33530	Transducin family protein / WD-40 repeat family protein	8.29079e-18	0.898553	143984	IPSTGLSSPEAR	TRUE	_IPSTGLSS[Phospho]PEAR_.2	_IPSTGLSS[Phospho]PEAR_	_IPSTGLSS[+80]PEAR_	FALSE	2.17638e+06	2.33484e+06	2.37236e+06	2.22863e+06	2128664		0.949498	0.270675	2.88295e-25	2.13427e-17	7.84859e-29	1.18573e-27	2.165e-15		48.6034	48.798	48.5574	48.7322	48.7522		0.974986	0.994424	0.996486	0.986289	0.995321		32.7338	33.0707	36.1422	25.2604	36.5154
A0A1I9LQ09	AT3G33530	Transducin family protein / WD-40 repeat family protein	8.29079e-18	0.898553	143984	ISSPTLDSGADEVAMPSK	TRUE	_ISS[Phospho]PTLDSGADEVAMPSK_.2	_ISS[Phospho]PTLDSGADEVAMPSK_	_ISS[+80]PTLDSGADEVAMPSK_	FALSE	796803	735783	895216	673338		674585	0.832805	0.109274	3.91674e-14	6.65896e-13	3.51325e-15	1.44999e-15		1.67464e-09	67.1819	67.4932	67.599	67.2751		67.3889	0.849686	0.855717	0.930473	0.88831		0.8971	13.4119	13.2128	18.4542	13.7192		13.8852
A0A1I9LQ18	AT3G62330	Zinc knuckle (CCHC-type) family protein;At3g62330	4.24361e-18	0.899298	44487	SDPELDDDFSEIYK	TRUE	_S[Phospho]DPELDDDFSEIYK_.2	_S[Phospho]DPELDDDFSEIYK_	_S[+80]DPELDDDFSEIYK_	FALSE	9438025	8607374	7.13238e+06	9245072	9354806	8.17765e+06	1.06354	0.527559	3.76885e-26	1.76988e-21	3.90308e-24	4.03707e-17	4.00814e-10	2.71911e-14	90.6219	90.9787	90.7026	90.7296	90.9719	91.2489	1	1	1	1	1	1	53.0537	57.8262	51.6281	62.5951	48.4494	50.851
A0A1I9LQ26	AT3G13910	Uncharacterized protein;Uncharacterized protein At3g13910	1.31651e-22	0.910591	13172.8	SWSFSDPESR	TRUE	_SWS[Phospho]FSDPESR_.2	_SWS[Phospho]FSDPESR_	_SWS[+80]FSDPESR_	FALSE	4308123	4.82752e+06	4.17485e+06	4.42698e+06	4.49894e+06	4302424	0.993828	0.901248	7.85797e-48	4.53114e-28	2.52811e-31	5.94762e-24	8.50982e-19	1.47624e-21	72.7685	73.127	73.3264	72.812	73.0894	73.3266	0.999827	0.999998	0.998232	0.99896	0.99711	0.997492	21.651	25.3575	29.2877	21.8342	21.5531	23.6949
A0A1I9LQ38	AT3G16785	Phospholipase;Phospholipase;Phospholipase;Phospholipase D zeta 1	3.7258e-17	0.89689	112239	NGPFSFR	TRUE	_NGPFS[Phospho]FR_.2	_NGPFS[Phospho]FR_	_NGPFS[+80]FR_	FALSE	107911	41927.5	1.74207	61600.2	37248.7	35957.5	0.899666	0.884909	0.000649308	2.313e-08	0.00512845	0.000271086	0.00108011	0.000310879	74.8042	75.3297	81.3847	74.8912	75.1539	75.5316	1	1	1	1	1	1
A0A1I9LQ38	AT3G16785	Phospholipase;Phospholipase;Phospholipase;Phospholipase D zeta 1	3.7258e-17	0.89689	112239	RDDSFSSR	TRUE	_RDDS[Phospho]FSSR_.2	_RDDS[Phospho]FSSR_	_RDDS[+80]FSSR_	FALSE	899398	1.10577e+06	1.37093e+06	1.20613e+06	1.23474e+06	1.10612e+06	1.05062	0.708675	0.000360684	4.5712e-13	7.57521e-22	3.12533e-16	8.57822e-05	2.6006e-11	33.8769	33.6332	32.6505	34.8717	34.1808	33.5056	0.959434	0.999858	0.999974	0.999982	0.906532	0.999983	7.15154	12.5659	17.7084	14.4103	3.96516	16.525
A0A1I9LQ49	AT3G22380	Time for coffee;Time for coffee;Protein TIME FOR COFFEE	4.78708e-22	0.909244	164584	AGSFRDSPEEEGPVELPEAAR	TRUE	_AGS[Phospho]FRDS[Phospho]PEEEGPVELPEAAR_.3	_AGS[Phospho]FRDS[Phospho]PEEEGPVELPEAAR_	_AGS[+80]FRDS[+80]PEEEGPVELPEAAR_	FALSE	792812	730068	606467	578011	615243	537362	0.812745	0.0880506	4.81182e-07	8.17612e-11	7.39233e-09	0.000107827	8.89981e-08	4.14429e-11	76.4427	76.6422	76.6138	76.2962	76.6047	77.0122	1	1	1	1	1	1
A0A1I9LQ49	AT3G22380	Time for coffee;Time for coffee;Protein TIME FOR COFFEE	4.78708e-22	0.909244	164584	AGSFRDSPEEEGPVELPEAAR	TRUE	_AGSFRDS[Phospho]PEEEGPVELPEAAR_.3	_AGSFRDS[Phospho]PEEEGPVELPEAAR_	_AGSFRDS[+80]PEEEGPVELPEAAR_	FALSE	17464708	14305170	13753770	14712470	14773059	13933583	0.95377	0.586383	1.00303e-32	1.22677e-22	1.76803e-26	2.27406e-25	1.79667e-26	1.33379e-13	73.8167	75.083	75.7789	74.229	75.261	75.8234	1	1	0.99999	1	0.999749	1	26.5071	27.9695	40.5029	31.3761	9.29103	45.0957
A0A1I9LQ49	AT3G22380	Time for coffee;Time for coffee;Protein TIME FOR COFFEE	4.78708e-22	0.909244	164584	DSPEEEGPVELPEAAR	TRUE	_DS[Phospho]PEEEGPVELPEAAR_.2	_DS[Phospho]PEEEGPVELPEAAR_	_DS[+80]PEEEGPVELPEAAR_	FALSE	4717443	4548212	4629321	4.62231e+06	4523601	4.40979e+06	0.975583	0.222993	1.10743e-37	4.78102e-23	5.57118e-32	8.1377e-22	1.65197e-13	9.80115e-22	70.8805	71.0548	71.05	70.7091	70.9366	71.1764	1	1	1	1	1	1
A0A1I9LQ49	AT3G22380	Time for coffee;Time for coffee;Protein TIME FOR COFFEE	4.78708e-22	0.909244	164584	ENATQHSETVGEDSPSTADSR	TRUE	_ENATQHSETVGEDS[Phospho]PSTADSR_.3	_ENATQHSETVGEDS[Phospho]PSTADSR_	_ENATQHSETVGEDS[+80]PSTADSR_	FALSE	721639	846281	752992	959288	1.03954e+06	1.04932e+06	1.31334	0.00673906	0.000928416	6.22485e-12	0.000283498	0.00096097	0.00122258	0.000445314	36.3264	36.4709	35.8307	36.8594	36.7845	36.5715	0.99981	0.993918	0.998659	0.999716	0.999648	0.999953	28.3339	24.0611	31.7189	50.8971	51.977	39.4977
A0A1I9LQ49	AT3G22380	Time for coffee;Time for coffee;Protein TIME FOR COFFEE	4.78708e-22	0.909244	164584	SSPSPAPVSPLVSTWK	TRUE	_SSPSPAPVS[Phospho]PLVSTWK_.2	_SSPSPAPVS[Phospho]PLVSTWK_	_SSPSPAPVS[+80]PLVSTWK_	FALSE	1.0272e+06	942019	669713	1.36098e+06	1.15264e+06	1.03429e+06	1.34445	0.103198	4.60936e-19	2.25942e-12	1.92732e-13	1.53192e-15	1.4305e-11	9.75031e-13	82.8011	83.1992	82.8215	82.8204	83.0866	83.3839	0.999343	0.999953	0.995676	0.999997	0.999943	0.999996	24.6329	30.9214	16.0321	35.4762	27.91	29.3287
A0A1I9LQ49	AT3G22380	Time for coffee;Time for coffee;Protein TIME FOR COFFEE	4.78708e-22	0.909244	164584	TTASASSAANK	TRUE	_TTAS[Phospho]ASSAANK_.2	_TTAS[Phospho]ASSAANK_	_TTAS[+80]ASSAANK_	FALSE	101628	89565	114715	47336.4	53948.8	91846.3	0.631339	0.0742305	3.75721e-06	1.19214e-05	4.54408e-09	0.000133077	0.000170125	0.000302643	15.3549	15.5239	15.3204	15.1962	15.1151	15.3745	0.993421	0.993851	0.994581	0.990294	0.980119	0.895322	8.89942	9.93215	8.35221	9.25349	8.43972	8.73062
A0A1I9LQ49	AT3G22380	Time for coffee;Time for coffee;Protein TIME FOR COFFEE	4.78708e-22	0.909244	164584	VSPASILASPSPPAPTSPSSSSISVR	TRUE	_VSPASILASPSPPAPTS[Phospho]PSSSSISVR_.3	_VSPASILASPSPPAPTS[Phospho]PSSSSISVR_	_VSPASILASPSPPAPTS[+80]PSSSSISVR_	FALSE	12677017	11499663	9730817	11944545	12876347	13028876	1.11627	0.226722	1.91574e-08	2.83411e-12	1.09008e-09	6.48075e-13	7.01683e-06	1.65659e-06	85.8755	86.4943	86.3688	86.2793	86.5351	86.6916	0.99913	0.999344	0.999094	0.999392	0.979497	0.999948	37.2633	33.2018	41.0346	39.1215	30.5232	55.7423
A0A1I9LQ65	AT3G50380	Vacuolar protein sorting-associated protein, putative (DUF1162);Vacuolar protein sorting-associated protein, putative (DUF1162);Vacuolar protein sorting-associated protein, putative (DUF1162);Vacuolar protein sorting-associated protein, putative (DUF1162)	3.78682e-05	0.850218	350696	IISLLDSR	TRUE	_IIS[Phospho]LLDSR_.2	_IIS[Phospho]LLDSR_	_IIS[+80]LLDSR_	FALSE	209357	194642	139255	133438	90169	106286	0.607252	0.0455528	6.84931e-11	7.54101e-09	6.51928e-13	0.000108188	4.08896e-05	0.000285664	80.7402	81.4772	81.2849	80.9309	81.3893	81.4931	0.99975	0.999085	0.999894	0.999822	0.998333	0.999981	13.5191	10.9489	10.9139	11.4022	9.05281	13.1013
A0A1I9LQ76	AT3G12340	Peptidylprolyl isomerase;Peptidyl-prolyl cis-trans isomerase FKBP43	5.52527e-06	0.857674	41880	SSAIIIDSDDGEGK	TRUE	_SSAIIIDS[Phospho]DDGEGK_.2	_SSAIIIDS[Phospho]DDGEGK_	_SSAIIIDS[+80]DDGEGK_	FALSE	407611	467064	389623	453887	400003	416790	1.00505	0.943693	2.3578e-05	1.34029e-13	2.34623e-14	0.000107287	7.58349e-06	3.17651e-09	53.5571	53.5391	53.2581	53.4396	53.5537	53.4835	0.993104	0.999895	0.99785	0.999997	0.99867	0.999832	6.66311	10.8516	7.83308	14.5797	8.31433	10.3854
A0A1I9LQ78	AT3G48190	Non-specific serine/threonine protein kinase;Non-specific serine/threonine protein kinase;Serine/threonine-protein kinase ATM	1.07138e-14	0.890524	338766	SLAPDSPEVGR	TRUE	_SLAPDS[Phospho]PEVGR_.2	_SLAPDS[Phospho]PEVGR_	_SLAPDS[+80]PEVGR_	FALSE	397640	500829	433960	535739	569184	604846	1.2832	0.0255055	6.53049e-12	6.25352e-19	2.19911e-14	1.00543e-09	4.22823e-06	1.49205e-09	46.7034	46.7281	46.5615	46.5707	46.8524	46.6725	0.999995	1	1	1	1	1	13.284	18.1328	15.5885	19.5458	16.1387	16.3659
A0A1I9LQF4	AT3G61480	Quinoprotein amine dehydrogenase, beta chain-like RIC1-like guanyl-nucleotide exchange factor;Quinoprotein amine dehydrogenase, beta chain-like RIC1-like guanyl-nucleotide exchange factor	6.24037e-20	0.903957	126359	DIEQAPTESDSLSPK	TRUE	_DIEQAPTESDSLS[Phospho]PK_.2	_DIEQAPTESDSLS[Phospho]PK_	_DIEQAPTESDSLS[+80]PK_	FALSE	5574335	5434422	5.53266e+06	3.8025e+06	4.19069e+06	4.18595e+06	0.736282	0.000422942	9.96629e-29	1.15067e-18	1.68973e-25	5.66198e-19	1.66038e-13	1.01822e-12	54.0668	54.0644	54.0609	54.0566	54.0939	54.0851	0.997208	0.998214	0.997608	0.999965	0.9999	0.999933	35.7952	29.3903	35.6076	31.427	25.6011	36.0073
A0A1I9LQF4	AT3G61480	Quinoprotein amine dehydrogenase, beta chain-like RIC1-like guanyl-nucleotide exchange factor;Quinoprotein amine dehydrogenase, beta chain-like RIC1-like guanyl-nucleotide exchange factor	6.24037e-20	0.903957	126359	EGELDEDNLSSDLSER	TRUE	_EGELDEDNLS[Phospho]S[Phospho]DLSER_.2	_EGELDEDNLS[Phospho]S[Phospho]DLSER_	_EGELDEDNLS[+80]S[+80]DLSER_	FALSE	585313	538795	443154	535444		461311	0.953977	0.718424	0.00485598	0.000799505	0.00125609	0.00027065		0.00032129	76.3451	76.113	76.193	75.9521		76.4376	0.937716	0.940152	0.910196	0.916694		0.93656	3.64302	3.68847	3.21216	3.30298		3.62198
A0A1I9LQF4	AT3G61480	Quinoprotein amine dehydrogenase, beta chain-like RIC1-like guanyl-nucleotide exchange factor;Quinoprotein amine dehydrogenase, beta chain-like RIC1-like guanyl-nucleotide exchange factor	6.24037e-20	0.903957	126359	EGELDEDNLSSDLSER	TRUE	_EGELDEDNLS[Phospho]SDLSER_.2	_EGELDEDNLS[Phospho]SDLSER_	_EGELDEDNLS[+80]SDLSER_	FALSE	9676492	8997570	9023221	8538116	7.77415e+06	8449233	0.894005	0.0405701	1.84126e-36	5.79006e-24	4.71767e-30	1.21845e-18	2.32635e-15	1.61434e-16	71.5014	71.6303	71.7026	71.454	71.6671	71.8285	0.996747	0.983918	0.963435	0.987869	0.97814	0.993477	36.1791	32.1638	32.8746	32.3222	27.0177	34.5323
A0A1I9LQF4	AT3G61480	Quinoprotein amine dehydrogenase, beta chain-like RIC1-like guanyl-nucleotide exchange factor;Quinoprotein amine dehydrogenase, beta chain-like RIC1-like guanyl-nucleotide exchange factor	6.24037e-20	0.903957	126359	QIGLTSTSSPK	TRUE	_QIGLTSTSS[Phospho]PK_.2	_QIGLTSTSS[Phospho]PK_	_QIGLTSTSS[+80]PK_	FALSE	2.08401e+06	2.1571e+06		2.3825e+06	2.33424e+06	2.54351e+06	1.14125	0.0400866	2.55717e-18	5.80607e-16		2.48477e-14	1.85189e-12	2.25447e-12	45.2887	45.266		45.2952	45.4066	45.1958	0.994454	0.999545		0.999205	0.999568	0.998975	35.7727	27.8804		27.4514	26.7326	27.4495
A0A1I9LQH7	AT3G12810	SNF2 domain-containing protein / helicase domain-containing protein;Protein PHOTOPERIOD-INDEPENDENT EARLY FLOWERING 1	1.07027e-17	0.898266	233578	DDLEAIPLSPK	TRUE	_DDLEAIPLS[Phospho]PK_.2	_DDLEAIPLS[Phospho]PK_	_DDLEAIPLS[+80]PK_	FALSE	1418416	1.36637e+06	1.16149e+06	1.20563e+06	1.2312e+06	1.1719e+06	0.914467	0.233683	8.82901e-23	2.90882e-31	2.68254e-34	6.81355e-30	2.09771e-10	1.23444e-22	75.4511	75.6518	75.7475	75.4291	75.6296	75.8073	1	1	1	1	1	1
A0A1I9LQH7	AT3G12810	SNF2 domain-containing protein / helicase domain-containing protein;Protein PHOTOPERIOD-INDEPENDENT EARLY FLOWERING 1	1.07027e-17	0.898266	233578	DENEDNLTSVSR	TRUE	_DENEDNLTSVS[Phospho]R_.2	_DENEDNLTSVS[Phospho]R_	_DENEDNLTSVS[+80]R_	FALSE	89672.6	42771.7	39428.8	161340	106306	105122	2.16886	0.053094	0.00482051	0.00754085	0.00769732	0.000622978	0.00270935	0.00381656	48.7606	48.866	48.826	48.8371	48.8755	48.9425	0.982554	0.985318	0.958953	0.994889	0.97741	0.915295	6.04569	5.89949	4.84426	6.96444	5.46054	4.07322
A0A1I9LQH7	AT3G12810	SNF2 domain-containing protein / helicase domain-containing protein;Protein PHOTOPERIOD-INDEPENDENT EARLY FLOWERING 1	1.07027e-17	0.898266	233578	DLIVDTDEEK	TRUE	_DLIVDT[Phospho]DEEK_.2	_DLIVDT[Phospho]DEEK_	_DLIVDT[+80]DEEK_	FALSE	1.22617e+06	1210719	1.20268e+06	1.1886e+06	1.31606e+06	1.35037e+06	1.0592	0.221895	1.13677e-25	1.47184e-21	9.81086e-24	5.16036e-15	2.44426e-12	1.92842e-14	54.6722	54.7624	54.6672	54.7388	54.7607	54.6901	1	1	1	1	1	1
A0A1I9LQH7	AT3G12810	SNF2 domain-containing protein / helicase domain-containing protein;Protein PHOTOPERIOD-INDEPENDENT EARLY FLOWERING 1	1.07027e-17	0.898266	233578	ETSPVKDENEDNLTSVSR	TRUE	_ETS[Phospho]PVKDENEDNLTSVSR_.2	_ETS[Phospho]PVKDENEDNLTSVSR_	_ETS[+80]PVKDENEDNLTSVSR_	FALSE	641820		538473	708645	631662	574638	1.08162	0.501491	8.81332e-16		1.3985e-21	4.90652e-12	1.62822e-10	3.69146e-15	50.4327		50.9139	50.4383	50.7356	50.8803	0.935782		0.905509	0.91274	0.909506	0.900022	23.5149		16.0825	23.1924	18.8404	15.8771
A0A1I9LQH7	AT3G12810	SNF2 domain-containing protein / helicase domain-containing protein;Protein PHOTOPERIOD-INDEPENDENT EARLY FLOWERING 1	1.07027e-17	0.898266	233578	TGNDQMLSLNSPIFNR	TRUE	_TGNDQMLSLNS[Phospho]PIFNR_.2	_TGNDQMLSLNS[Phospho]PIFNR_	_TGNDQMLSLNS[+80]PIFNR_	FALSE	80948.5	78903			80391.9	48280.3	0.804948	0.434766	0.00392272	3.7232e-06			0.000364943	0.000427027	92.0221	92.6421			92.5873	92.7562	0.792182	0.927532			0.911583	0.903079	13.369	8.44529			9.54966	10.7048
A0A1I9LQJ9	AT3G56720	Pre-mRNA-splicing factor;Pre-mRNA-splicing factor;Pre-mRNA-splicing factor;At3g56720;AT3G56720 protein;Pre-mRNA-splicing factor	0.000359185	0.803551	33232.6	MDTELNSPPHDDGGDTTTAFR	TRUE	_[Acetyl (Protein N-term)]M[Oxidation]DTELNS[Phospho]PPHDDGGDTTTAFR_.3	_[Acetyl (Protein N-term)]M[Oxidation]DTELNS[Phospho]PPHDDGGDTTTAFR_	_[+84]M[+16]DTELNS[+80]PPHDDGGDTTTAFR_	FALSE	865823	1.92382e+06	3.27946e+06		3.01118e+06	2.92326e+06	1.46672	0.372285	0.00480697	0.00137919	3.28724e-05		0.000582189	0.000176901	61.8558	58.8913	59.044		58.9939	59.1883	0.933533	0.999998	1		1	0.999998	8.70215	39.3819	42.9167		48.877	38.7526
A0A1I9LQJ9	AT3G56720	Pre-mRNA-splicing factor;Pre-mRNA-splicing factor;Pre-mRNA-splicing factor;At3g56720;AT3G56720 protein;Pre-mRNA-splicing factor	0.000359185	0.803551	33232.6	ALADDGSSSSDGSPER	TRUE	_ALADDGS[Phospho]S[Phospho]S[Phospho]S[Phospho]DGS[Phospho]PER_.2	_ALADDGS[Phospho]S[Phospho]S[Phospho]S[Phospho]DGS[Phospho]PER_	_ALADDGS[+80]S[+80]S[+80]S[+80]DGS[+80]PER_	FALSE	774289	936357	806925	717782	755304	664680	0.849138	0.0867553	0.00261596	0.000581447	0.00251959	0.00140599	0.000263533	0.00363354	29.2499	28.5033	29.0584	28.6879	28.381	28.9567	1	1	1	1	1	1
A0A1I9LQK5	AT3G21100	RNA-binding (RRM/RBD/RNP motifs) family protein	4.51251e-20	0.904323	66235	GNFSPGSSPSGMDSR	TRUE	_GNFS[Phospho]PGSSPSGMDSR_.2	_GNFS[Phospho]PGSSPSGMDSR_	_GNFS[+80]PGSSPSGMDSR_	FALSE	114601	100379	99755.6	90070.9	155170	146321	1.2441	0.288743	0.000214737	8.17641e-09	5.35436e-06	5.80566e-06	1.99232e-12	0.00106584	50.4621	50.5043	50.5286	50.3605	50.412	50.495	0.995752	0.999774	0.997817	0.99981	0.999164	0.99966	10.8321	15.4815	11.5571	12.4654	13.2263	14.0172
A0A1I9LQU3	AT3G23400	Plastid-lipid associated protein PAP / fibrillin family protein;Plastid-lipid associated protein PAP / fibrillin family protein;Plastid-lipid-associated protein 6, chloroplastic	3.51923e-17	0.896952	22463.7	GLVASVDDLER	TRUE	_GLVAS[Phospho]VDDLER_.2	_GLVAS[Phospho]VDDLER_	_GLVAS[+80]VDDLER_	FALSE	1.06092e+06	1.12033e+06	974405	834078	797172	773021	0.761893	0.00549759	2.04313e-18	1.3085e-14	6.90344e-21	1.53269e-17	5.98136e-11	9.51183e-10	72.6829	73.1646	73.3178	72.8035	73.127	73.2562	1	1	1	1	1	1
A0A1I9LQW2	AT3G51640	Stress response NST1-like protein	3.90927e-07	0.864611	92286.3	SNSDGEEVDKR	TRUE	_SNS[Phospho]DGEEVDKR_.2	_SNS[Phospho]DGEEVDKR_	_SNS[+80]DGEEVDKR_	FALSE	549930	647584	733406	535554	613475	612173	0.912105	0.391418	2.26297e-25	1.67028e-15	3.02716e-30	1.10703e-13	5.70374e-10	1.65061e-09	26.4937	26.1628	25.714	26.776	26.5041	26.0594	0.999887	1	0.99924	0.999132	0.999998	0.997679	11.0222	19.7958	8.18084	15.0858	23.6662	7.06357
A0A1I9LQY7	AT3G56570	N-lysine methyltransferase	1.5103e-26	0.919698	59538.8	LDLAESTTGASPSK	TRUE	_LDLAESTTGAS[Phospho]PSK_.2	_LDLAESTTGAS[Phospho]PSK_	_LDLAESTTGAS[+80]PSK_	FALSE	385643	506110	404576	632136	559022	564550	1.35437	0.0256671	1.20927e-07	0.000694501	9.59304e-10	6.56942e-16	5.39895e-10	0.000277013	51.5747	51.6635	51.612	51.4575	51.6174	51.6547	0.947739	0.752781	0.818534	0.982664	0.799722	0.944371	15.2494	14.4803	16.1191	20.9223	15.0607	17.1819
A0A1I9LR04	AT3G49470	Nascent polypeptide-associated complex subunit alpha-like protein 2	9.37154e-08	0.86764	25399	MPEIGATSQR	TRUE	_MPEIGATS[Phospho]QR_.2	_MPEIGATS[Phospho]QR_	_MPEIGATS[+80]QR_	FALSE	511642	486916		485611	434485	475737	0.931899	0.223388	2.64326e-13	1.5402e-11		3.36944e-13	1.83544e-09	0.000289675	49.081	49.2913		49.2251	49.2145	49.1587	0.998329	0.999529		0.999955	0.999225	0.9935	10.6664	9.02266		11.0159	8.16215	6.02941
A0A1I9LR97	AT3G05740	ATP-dependent DNA helicase;ATP-dependent DNA helicase Q-like 1	0.0033146	0.751029	58968.6	STNPSDNGFDTDDDDDDSR	TRUE	_STNPSDNGFDT[Phospho]DDDDDDSR_.2	_STNPSDNGFDT[Phospho]DDDDDDSR_	_STNPSDNGFDT[+80]DDDDDDSR_	FALSE	78915.5		43146.7	104311	69538.6		1.42427	0.408249	0.00020643		0.00443522	0.00610049	0.00635912		41.6649		42.0531	41.6885	41.8185		0.991571		0.953465	0.982372	0.980165		15.6049		13.0325	14.6392	16.8571
A0A1I9LRC2	AT3G53630	Uncharacterized protein;AT3g53630/F4P12_330	5.38263e-12	0.882981	25828.6	SDDSDGDDDGEGQTSLDR	TRUE	_S[Phospho]DDS[Phospho]DGDDDGEGQTSLDR_.2	_S[Phospho]DDS[Phospho]DGDDDGEGQTSLDR_	_S[+80]DDS[+80]DGDDDGEGQTSLDR_	FALSE	73758.6	85088.8	70915.9	57789	93033	68830.9	0.955997	0.779847	0.000199045	0.00154184	0.00360189	0.00806409	6.58785e-06	6.09453e-10	39.8918	39.6841	39.6789	39.7019	39.7199	39.7223	0.999973	0.99996	0.999984	0.996682	0.995752	0.999999	14.4652	15.7778	17.8512	14.2867	12.3983	19.799
A0A1I9LRC2	AT3G53630	Uncharacterized protein;AT3g53630/F4P12_330	5.38263e-12	0.882981	25828.6	SDDSDGDDDGEGQTSLDR	TRUE	_SDDS[Phospho]DGDDDGEGQTSLDR_.2	_SDDS[Phospho]DGDDDGEGQTSLDR_	_SDDS[+80]DGDDDGEGQTSLDR_	FALSE	1.75778e+06	1.88952e+06	2.17881e+06	1.56491e+06	1.6295e+06	1.65283e+06	0.831988	0.0621594	8.16602e-23	6.84959e-27	7.79792e-20	8.62269e-16	2.46378e-09	7.71581e-11	38.0471	37.9465	37.802	38.1647	38.09	37.9692	0.995137	0.95456	0.993814	0.989497	0.996161	0.995692	44.7915	33.4207	47.3573	43.5799	48.8305	45.2772
A0A1I9LRC7	AT3G29770	Methyl esterase 11;Putative methylesterase 11, chloroplastic	2.92489e-10	0.877453	31285.5	QSSIGASSSGSGLNSNR	TRUE	_QSS[Phospho]IGASSSGSGLNSNR_.2	_QSS[Phospho]IGASSSGSGLNSNR_	_QSS[+80]IGASSSGSGLNSNR_	FALSE	1.07072e+06	1.13555e+06	1.33709e+06	1.30795e+06	1.35356e+06	1.40154e+06	1.14667	0.110068	1.64809e-19	1.59058e-14	1.23857e-22	4.54189e-15	4.34749e-10	7.45109e-12	38.4013	38.3007	38.1562	38.5188	38.352	38.3233	0.988945	0.991451	0.967773	0.998438	0.998588	0.987071	39.9906	42.5771	43.7038	44.6854	52.3517	43.6379
A0A1I9LRH4	AT3G26744	Basic helix-loop-helix (BHLH) DNA-binding superfamily protein;Transcription factor ICE1	0.000292983	0.814769	51653.8	EELCPSSLPSPK	TRUE	_EELC[Carbamidomethyl]PSSLPS[Phospho]PK_.2	_EELC[Carbamidomethyl]PSSLPS[Phospho]PK_	_EELC[+57]PSSLPS[+80]PK_	FALSE	406022	217498	251323	385207	346310	209693	1.07586	0.792676	0.000629966	0.00394352	0.00417821	3.27272e-10	4.8977e-06	0.00510398	60.3085	60.6641	60.4968	60.3732	60.5664	60.5139	0.937825	0.972668	0.922207	0.965537	0.977477	0.977735	4.40675	5.26514	4.16587	5.02595	5.46358	5.47535
A0A1I9LRJ6	AT3G60370	Peptidylprolyl isomerase;Peptidyl-prolyl cis-trans isomerase FKBP20-2, chloroplastic	3.70043e-15	0.89174	30385.7	IDSTYIQGSPAR	TRUE	_IDSTYIQGS[Phospho]PAR_.2	_IDSTYIQGS[Phospho]PAR_	_IDSTYIQGS[+80]PAR_	FALSE	828970	757175	816987	640011	706315	745412	0.870422	0.0521277	1.27929e-22	6.57314e-17	4.49576e-23	4.0455e-19	1.78e-09	4.58303e-12	49.6226	49.7104	49.7642	49.7359	49.6643	49.7164	1	1	0.999999	1	1	1	21.6947	25.4451	16.1287	24.9768	30.4663	23.737
A0A1I9LRR2	AT3G05700	Drought-responsive family protein;Protein DEHYDRATION-INDUCED 19 homolog 3	4.31858e-19	0.901839	22566.5	GGSYSTLSILR	TRUE	_GGS[Phospho]YSTLSILR_.2	_GGS[Phospho]YSTLSILR_	_GGS[+80]YSTLSILR_	FALSE	611011	373851	319746	537299	302873	267490	0.849039	0.622237	5.38371e-19	4.27163e-22	6.67441e-14	1.1955e-11	1.04445e-07	3.91699e-09	83.3905	83.8833	83.6927	83.4251	83.8314	84.113	0.999935	0.996697	0.997577	0.999978	0.999979	0.999985	12.2109	14.1608	10.1424	14.5195	14.8901	15.2073
A0A1I9LRS8	AT3G13300	Transducin/WD40 repeat-like superfamily protein;Enhancer of mRNA-decapping protein 4	6.52029e-25	0.915974	133682	AGDESGVDSR	TRUE	_AGDES[Phospho]GVDSR_.2	_AGDES[Phospho]GVDSR_	_AGDES[+80]GVDSR_	FALSE	160273	142988	158034	119282	144363	149677	0.896005	0.21386	0.00551085	0.0024542	0.00343434	0.00747945	0.00334433	2.08569e-05	20.9913	20.8133	20.6525	20.9701	20.9141	20.6843	0.999467	0.999331	0.980602	0.999926	0.997953	0.999054	10.4972	8.30831	4.923	10.5054	9.98693	12.9337
A0A1I9LRS8	AT3G13300	Transducin/WD40 repeat-like superfamily protein;Enhancer of mRNA-decapping protein 4	6.52029e-25	0.915974	133682	DCYPSTEGTFIPGESK	TRUE	_DC[Carbamidomethyl]Y[Phospho]PSTEGTFIPGESK_.2	_DC[Carbamidomethyl]Y[Phospho]PSTEGTFIPGESK_	_DC[+57]Y[+80]PSTEGTFIPGESK_	FALSE	1.28308e+06	1.17215e+06	1250342	2.05424e+06	1.98566e+06	1.98521e+06	1.62596	4.26814e-05	0.00154158	6.90253e-09	4.43268e-27	0.000107842	1.5131e-08	9.22171e-16	71.9563	72.0172	72.0715	71.896	72.0175	72.2159	0.99085	0.993817	0.99063	0.995031	0.998666	0.980254	8.74123	14.8231	16.3621	15.6822	20.0184	17.2003
A0A1I9LRS8	AT3G13300	Transducin/WD40 repeat-like superfamily protein;Enhancer of mRNA-decapping protein 4	6.52029e-25	0.915974	133682	SFPGGSGPIR	TRUE	_S[Phospho]FPGGSGPIR_.2	_S[Phospho]FPGGSGPIR_	_S[+80]FPGGSGPIR_	FALSE		123665	381421	106474		324465	0.853201	0.846529		0.000540127	0.000129121	0.00269402		0.000382886		57.7677	57.6971	57.3093		57.7878		0.761724	0.901598	0.999616		0.829497		2.16216	3.21511	8.86548		2.58207
A0A1I9LRS8	AT3G13300	Transducin/WD40 repeat-like superfamily protein;Enhancer of mRNA-decapping protein 4	6.52029e-25	0.915974	133682	SNADALWAR	TRUE	_S[Phospho]NADALWAR_.2	_S[Phospho]NADALWAR_	_S[+80]NADALWAR_	FALSE	55237.3		33337.1	59404.6	73195.8		1.49705	0.231028	5.51081e-05		0.00123538	0.000143006	0.00811699		64.7061		64.8284	64.5381	65.0728		1		1	1	1
A0A1I9LRS8	AT3G13300	Transducin/WD40 repeat-like superfamily protein;Enhancer of mRNA-decapping protein 4	6.52029e-25	0.915974	133682	SPSAFFK	TRUE	_S[Phospho]PSAFFK_.2	_S[Phospho]PSAFFK_	_S[+80]PSAFFK_	FALSE	4.02247e+06	3.77725e+06	3.69442e+06	4.44376e+06	4.23848e+06	4143958	1.11589	0.0284778	1.46619e-13	2.50581e-14	1.40066e-24	4.91039e-15	2.88796e-13	4.20174e-17	66.1305	66.4847	66.1521	66.1835	66.4132	66.3756	1	1	1	1	1	0.999999	27.6795	21.0386	18.9233	25.2439	21.0061	15.362
A0A1I9LRS8	AT3G13300	Transducin/WD40 repeat-like superfamily protein;Enhancer of mRNA-decapping protein 4	6.52029e-25	0.915974	133682	SDSSVSR	TRUE	_SDS[Phospho]SVSR_.2	_SDS[Phospho]SVSR_	_SDS[+80]SVSR_	FALSE	2.25787e+06		3.20571e+06	3.31278e+06	3.73476e+06	3.37211e+06	1.27141	0.155039	2.71224e-07		0.00340445	1.38548e-10	2.79028e-05	1.99769e-24	12.2174		11.9467	12.2214	12.409	11.967	0.764756		0.892527	0.992335	0.819988	0.922718	5.80933		6.76004	14.1763	13.7468	9.1567
A0A1I9LRS8	AT3G13300	Transducin/WD40 repeat-like superfamily protein;Enhancer of mRNA-decapping protein 4	6.52029e-25	0.915974	133682	SFPGGSGPIR	TRUE	_SFPGGS[Phospho]GPIR_.2	_SFPGGS[Phospho]GPIR_	_SFPGGS[+80]GPIR_	FALSE	4.13192e+06	3743445	3.56762e+06	5342124	5221397	5052262	1.36466	0.00173426	5.51831e-37	2.64172e-27	1.70264e-40	2.05924e-26	1.09533e-17	6.12445e-21	58.7581	58.8034	58.8791	58.6849	59.1059	58.9007	0.999994	0.999779	0.999979	0.999979	0.999998	0.999997	12.9687	9.41564	11.7514	11.7786	14.3821	13.848
A0A1I9LRS8	AT3G13300	Transducin/WD40 repeat-like superfamily protein;Enhancer of mRNA-decapping protein 4	6.52029e-25	0.915974	133682	TLSYPTPPLNLQSPR	TRUE	_TLSYPTPPLNLQS[Phospho]PR_.2	_TLSYPTPPLNLQS[Phospho]PR_	_TLSYPTPPLNLQS[+80]PR_	FALSE	23123204	20847798	17241474	34261008	35229248	35072492	1.70819	0.00114422	4.60437e-48	4.44815e-32	4.59279e-35	1.37072e-30	2.22729e-22	2.30857e-26	84.9363	85.5239	85.4135	85.3251	85.5491	85.7524	1	1	1	1	1	1	50.3719	58.5881	48.5995	66.4886	60.5826	67.5915
A0A1I9LRS8	AT3G13300	Transducin/WD40 repeat-like superfamily protein;Enhancer of mRNA-decapping protein 4	6.52029e-25	0.915974	133682	TPSADYSVDR	TRUE	_TPS[Phospho]ADYSVDR_.2	_TPS[Phospho]ADYSVDR_	_TPS[+80]ADYSVDR_	FALSE	3.35702e+06	4.14946e+06	4793256	3.90978e+06	3835597	4099260	0.962999	0.737822	6.67421e-25	6.30891e-21	1.88293e-27	5.85979e-20	3.87548e-12	1.24306e-13	42.0144	42.1303	41.9593	42.0843	42.2105	42.2307	1	1	0.999998	0.999999	0.999999	0.999998	31.921	36.4208	31.2533	28.0108	30.7013	29.3876
A0A1I9LRS8	AT3G13300	Transducin/WD40 repeat-like superfamily protein;Enhancer of mRNA-decapping protein 4	6.52029e-25	0.915974	133682	TSGLPSQTSGAGSAYATLPQLPLSPR	TRUE	_TSGLPSQTSGAGSAYATLPQLPLS[Phospho]PR_.3	_TSGLPSQTSGAGSAYATLPQLPLS[Phospho]PR_	_TSGLPSQTSGAGSAYATLPQLPLS[+80]PR_	FALSE	23648556	23918660	16496497	24480600	25121884	21832768	1.11507	0.403132	1.79243e-35	6.04234e-22	7.09652e-28	3.31929e-20	3.65507e-14	2.39667e-15	95.6337	95.7128	95.715	95.6152	95.6561	96.3024	1	1	1	1	1	1	50.0233	55.478	53.1581	51.8053	46.124	38.6735
A0A1I9LRS8	AT3G13300	Transducin/WD40 repeat-like superfamily protein;Enhancer of mRNA-decapping protein 4	6.52029e-25	0.915974	133682	VFCSQVSNLSTEMAR	TRUE	_VFC[Carbamidomethyl]SQVS[Phospho]NLS[Phospho]TEMAR_.2	_VFC[Carbamidomethyl]SQVS[Phospho]NLS[Phospho]TEMAR_	_VFC[+57]SQVS[+80]NLS[+80]TEMAR_	FALSE		726420	758818	1270078		1.24687e+06	1.69465	0.00148863		3.02911e-05	1.83635e-08	0.000108607		1.32872e-08		75.9257	75.975	75.8109		76.1888		0.923835	0.888295	0.904681		0.985784		12.6863	14.7413	17.8437		18.3708
A0A1I9LRS8	AT3G13300	Transducin/WD40 repeat-like superfamily protein;Enhancer of mRNA-decapping protein 4	6.52029e-25	0.915974	133682	VFCSQVSNLSTEMAR	TRUE	_VFC[Carbamidomethyl]SQVS[Phospho]NLSTEM[Oxidation]AR_.2	_VFC[Carbamidomethyl]SQVS[Phospho]NLSTEM[Oxidation]AR_	_VFC[+57]SQVS[+80]NLSTEM[+16]AR_	FALSE	1.08261e+06	1.01427e+06	1.23815e+06	1.21182e+06	1.47951e+06	1.31941e+06	1.20261	0.0921608	3.80611e-20	5.82336e-14	7.4659e-18	1.27744e-13	3.32964e-10	1.34149e-10	62.6889	63.031	63.1932	62.8454	62.9788	63.1427	0.999986	0.999968	1	0.999986	0.99995	1	37.02	31.0704	40.5422	35.7067	43.2192	44.473
A0A1I9LRS8	AT3G13300	Transducin/WD40 repeat-like superfamily protein;Enhancer of mRNA-decapping protein 4	6.52029e-25	0.915974	133682	VFCSQVSNLSTEMAR	TRUE	_VFC[Carbamidomethyl]SQVS[Phospho]NLSTEMAR_.2	_VFC[Carbamidomethyl]SQVS[Phospho]NLSTEMAR_	_VFC[+57]SQVS[+80]NLSTEMAR_	FALSE	3.14742e+06	3.11058e+06	2.58744e+06	3.64597e+06		3571094	1.22386	0.0674421	1.47463e-28	4.47788e-18	4.84836e-25	1.83458e-21		2.10443e-14	78.2813	78.8352	78.5941	78.3965		78.8824	0.999536	0.99989	0.977643	0.998997		0.999999	28.8324	32.134	29.7802	29.6256		38.3214
A0A1I9LRS8	AT3G13300	Transducin/WD40 repeat-like superfamily protein;Enhancer of mRNA-decapping protein 4	6.52029e-25	0.915974	133682	VFCSQVSNLSTEMAR	TRUE	_VFC[Carbamidomethyl]SQVSNLS[Phospho]TEM[Oxidation]AR_.2	_VFC[Carbamidomethyl]SQVSNLS[Phospho]TEM[Oxidation]AR_	_VFC[+57]SQVSNLS[+80]TEM[+16]AR_	FALSE	992344	977427		1.09996e+06	1.17309e+06	1.20994e+06	1.17881	0.0248802	9.85641e-23	3.20067e-05		1.3295e-16	2.99733e-09	1.97256e-12	59.4329	59.6794		59.2827	59.6435	59.6685	0.992568	0.933354		0.994704	0.921775	0.956797	25.3528	19.4135		29.6485	24.2115	27.8913
A0A1I9LRW0	AT3G18040	Mitogen-activated protein kinase	1.65312e-08	0.870929	74397	SASISASK	TRUE	_SAS[Phospho]ISASK_.2	_SAS[Phospho]ISASK_	_SAS[+80]ISASK_	FALSE	654755	685243	823357	874533	843156	990686	1.25193	0.0570515	0.00021001	0.000463414	0.000385485	0.000149098	2.81085e-17	7.9098e-11	19.2192	19.3709	19.2478	19.3168	19.3615	19.1596	0.877021	0.979375	0.993016	0.995365	0.998837	0.999431	8.98904	11.2795	9.21363	12.2878	14.2032	17.4237
A0A1I9LRW0	AT3G18040	Mitogen-activated protein kinase	1.65312e-08	0.870929	74397	SQLTTIYR	TRUE	_SQLT[Phospho]TIYR_.2	_SQLT[Phospho]TIYR_	_SQLT[+80]TIYR_	FALSE	21529.9	55761.4		309749	304829		7.95144	0.00411749	6.02054e-06	0.00547726		7.84454e-09	0.00187297		60.8664	61.201		61.0144	61.0943		0.918933	0.783242		0.885692	0.898035		10.3923	11.8445		14.3472	12.835
A0A1I9LS11	AT3G09600	Homeodomain-like superfamily protein;Homeodomain-like superfamily protein;Homeodomain-like superfamily protein;Protein REVEILLE 8	4.71025e-20	0.904273	26753.5	GLLNVSSPSTSGMGSSSR	TRUE	_GLLNVSS[Phospho]PSTSGM[Oxidation]GSSSR_.2	_GLLNVSS[Phospho]PSTSGM[Oxidation]GSSSR_	_GLLNVSS[+80]PSTSGM[+16]GSSSR_	FALSE	288215	209138	204144	237775	229366		0.99888	0.994545	0.00673354	0.00224905	0.000894355	0.000107848	4.45422e-05		59.8785	60.1413	60.0802	59.9127	60.2127		0.944033	0.754544	0.765482	0.991074	0.970103		15.2517	13.9694	15.0772	23.6701	23.1443
A0A1I9LS11	AT3G09600	Homeodomain-like superfamily protein;Homeodomain-like superfamily protein;Homeodomain-like superfamily protein;Protein REVEILLE 8	4.71025e-20	0.904273	26753.5	TVSGSEIVR	TRUE	_TVS[Phospho]GSEIVR_.2	_TVS[Phospho]GSEIVR_	_TVS[+80]GSEIVR_	FALSE	264337	204298	206317	195510	174853		0.823089	0.230843	0.00254631	1.35644e-08	0.000219112	0.000320333	0.00474019		44.1878	44.2265	44.0888	44.3337	44.2137		0.999763	0.996355	0.997717	0.874859	0.994585		12.7605	10.0624	11.2051	4.02263	7.74583
A0A1I9LS11	AT3G09600	Homeodomain-like superfamily protein;Homeodomain-like superfamily protein;Homeodomain-like superfamily protein;Protein REVEILLE 8	4.71025e-20	0.904273	26753.5	VISPQHELATLR	TRUE	_VIS[Phospho]PQHELATLR_.2	_VIS[Phospho]PQHELATLR_	_VIS[+80]PQHELATLR_	FALSE	2.30304e+06	2.2905e+06	1.41904e+06	3.04868e+06	3.18603e+06	2.88735e+06	1.51716	0.0273372	1.07534e-46	1.61524e-20	5.61878e-22	6.16612e-24	2.86526e-10	3.94602e-15	76.9569	78.3596	79.4472	77.242	78.6634	79.472	0.999983	1	1	1	1	1	11.9903	28.3658	35.1678	22.199	26.1756	29.1125
A0A1I9LS39	AT3G14172	GPI-anchored adhesin-like protein	1.29304e-13	0.887605	136724	HQGNSPDR	TRUE	_HQGNS[Phospho]PDR_.2	_HQGNS[Phospho]PDR_	_HQGNS[+80]PDR_	FALSE	792993	798721	1.01217e+06	924924	964256	920048	1.07886	0.404268	2.20202e-12	8.64099e-12	9.00055e-16	1.64738e-10	4.74592e-07	7.71019e-11	7.61424	8.08194	7.39401	7.78077	8.16476	7.56042	1	1	1	1	1	1
A0A1I9LS39	AT3G14172	GPI-anchored adhesin-like protein	1.29304e-13	0.887605	136724	LSSDLSSSAGMEK	TRUE	_LSS[Phospho]DLSSSAGM[Oxidation]EK_.2	_LSS[Phospho]DLSSSAGM[Oxidation]EK_	_LSS[+80]DLSSSAGM[+16]EK_	FALSE	188496	256945	308503	344407	373129	357268	1.42558	0.0402231	1.40513e-32	1.87133e-25	5.41708e-21	5.43889e-15	4.78162e-10	2.75197e-14	41.7264	41.9041	41.6864	41.8267	42.0459	41.9274	0.997476	0.816753	0.997364	0.999754	0.996783	0.977839	32.2669	34.7169	32.9983	49.4826	48.9178	44.0079
A0A1I9LS39	AT3G14172	GPI-anchored adhesin-like protein	1.29304e-13	0.887605	136724	LSSDLSSSAGMEK	TRUE	_LSS[Phospho]DLSSSAGMEK_.2	_LSS[Phospho]DLSSSAGMEK_	_LSS[+80]DLSSSAGMEK_	FALSE	348928	430778	400372	476464	518803	517889	1.28225	0.0159604	1.33034e-20	3.92911e-21	5.76285e-19	2.75003e-15	2.00765e-12	1.98019e-10	51.5557	51.6752	51.6698	51.4078	51.6752	51.7125	0.995988	0.942109	0.98738	0.985921	0.998443	0.888233	13.7075	13.3304	10.5104	11.9509	14.966	11.089
A0A1I9LS39	AT3G14172	GPI-anchored adhesin-like protein	1.29304e-13	0.887605	136724	RLSVQER	TRUE	_RLS[Phospho]VQER_.2	_RLS[Phospho]VQER_	_RLS[+80]VQER_	FALSE	687931	722754	976493	1.2183e+06	1.27818e+06	958658	1.44737	0.0562863	1.88613e-24	0.000645189	0.00704095	2.03333e-15	1.36065e-07	0.000443882	38.5291	38.198	37.8536	39.1075	38.8026	38.4818	1	1	1	1	1	1
A0A1I9LSB9	AT3G07030	Alba DNA/RNA-binding protein	4.50217e-18	0.89923	43698.6	PESPINENEIR	TRUE	_PES[Phospho]PINENEIR_.2	_PES[Phospho]PINENEIR_	_PES[+80]PINENEIR_	FALSE	150660	109918	142119	60919.5	200105	90648.8	0.873295	0.719377	0.00116431	0.00109683	0.00544556	0.000249109	0.000910693	0.00129892	51.0024	51.2445	51.1618	50.9466	51.2291	51.2509	1	1	1	1	1	1
A0A1I9LSB9	AT3G07030	Alba DNA/RNA-binding protein	4.50217e-18	0.89923	43698.6	PKPESPINENEIR	TRUE	_PKPES[Phospho]PINENEIR_.2	_PKPES[Phospho]PINENEIR_	_PKPES[+80]PINENEIR_	FALSE	6696984	5.82943e+06	5.47145e+06	5760774	5.65877e+06	5769993	0.955088	0.501996	2.13454e-28	1.83021e-17	2.6502e-13	4.54111e-19	4.60689e-14	4.59986e-12	51.8454	52.2106	52.3281	51.8356	52.5173	52.7693	1	1	1	1	1	1
A0A1I9LSB9	AT3G07030	Alba DNA/RNA-binding protein	4.50217e-18	0.89923	43698.6	SRDGASNQNEA	TRUE	_S[Phospho]RDGASNQNEA_.2	_S[Phospho]RDGASNQNEA_	_S[+80]RDGASNQNEA_	FALSE	286097	235859	293200	213102	213797	242690	0.821424	0.0771897	5.81684e-07	7.9858e-05	9.68513e-09	0.000107838	0.000378206	0.000282673	14.3515	14.78	14.5732	14.5496	14.4518	14.5215	0.988409	0.999811	0.996029	0.997481	0.999924	0.988626	13.083	22.5437	20.783	15.7499	18.9563	15.1171
A0A1I9LSC6	AT3G09370	Myb domain protein 3r-3;Transcription factor MYB3R-3	8.71413e-06	0.856186	57789.3	SPESYLR	TRUE	_S[Phospho]PESYLR_.2	_S[Phospho]PESYLR_	_S[+80]PESYLR_	FALSE	904139	727782	746556	820396	820116	710428	0.988422	0.8974	1.01421e-24	1.06144e-12	1.64586e-07	1.68807e-15	2.41557e-06	8.28202e-12	52.7494	52.8384	52.5414	52.7546	52.93	52.7216	1	0.999972	0.999996	0.999998	0.999877	1	16.7992	12.1754	14.0296	14.9812	10.6971	18.1273
A0A1I9LSC8	AT3G56990	Embryo sac development arrest 7;Embryo sac development arrest 7;AT3g56990/F24I3_70	0.00103442	0.77951	67951.7	LHGDESEEENKTAEDGEATK	TRUE	_LHGDES[Phospho]EEENKTAEDGEATK_.3	_LHGDES[Phospho]EEENKTAEDGEATK_	_LHGDES[+80]EEENKTAEDGEATK_	FALSE	705757	997177	1001074	1.46243e+06	1.36235e+06	1364908	1.54943	0.00865485	0.00354687	0.00100718	7.46948e-05	0.00010969	0.000238198	0.00138221	42.7022	43.0332	43.1867	43.5403	43.1743	43.4863	0.987208	0.999995	0.999434	0.991132	0.999319	0.997283	12.8337	14.6105	12.0642	13.9733	18.7046	13.0136
A0A1I9LSK3	AT3G02260	Auxin transport protein (BIG);Auxin transport protein (BIG);Auxin transport protein (BIG);Auxin transport protein BIG	1.80812e-06	0.860875	566616	YSSESEENNLNVSQK	TRUE	_YSS[Phospho]ESEENNLNVSQK_.2	_YSS[Phospho]ESEENNLNVSQK_	_YSS[+80]ESEENNLNVSQK_	FALSE	1.17319e+06	1.20985e+06	1.38609e+06	1.28742e+06	1.36131e+06	1.36353e+06	1.06451	0.313273	3.97902e-13	3.30883e-08	1.20255e-05	1.99898e-11	2.09847e-06	6.63018e-06	45.7081	45.4395	45.5649	45.5299	45.6568	45.4308	0.861661	0.952898	0.965353	0.95806	0.992152	0.973935	32.2317	25.3395	30.9563	30.195	28.5027	31.5071
A0A1I9LSR4	AT3G13360	WPP domain interacting protein 3;WPP domain-interacting protein 3	1.41231e-12	0.884687	56671.5	SNSVESPGGSVHSTR	TRUE	_SNS[Phospho]VESPGGSVHSTR_.2	_SNS[Phospho]VESPGGSVHSTR_	_SNS[+80]VESPGGSVHSTR_	FALSE	712506	620755	885553	593088	787884	555170	0.872602	0.42404	8.56195e-09	7.47836e-08	0.00299052	7.87857e-16	0.00143976	1.45051e-08	34.5935	34.4117	33.5059	34.988	34.8973	34.3149	0.988622	0.953819	0.846088	0.940268	0.936296	0.940588	19.0626	19.3327	22.4338	16.2126	12.763	17.2662
A0A1I9LSS9	AT3G51860	Vacuolar cation/proton exchanger;Vacuolar cation/proton exchanger;Vacuolar cation/proton exchanger 1;Vacuolar cation/proton exchanger 3	2.36768e-26	0.919266	51289.2	TAHNMSSSSLR	TRUE	_TAHNM[Oxidation]S[Phospho]SSSLR_.2	_TAHNM[Oxidation]S[Phospho]SSSLR_	_TAHNM[+16]S[+80]SSSLR_	FALSE	9139793	11901382	12174704	6.72911e+06	7.63796e+06	7.82819e+06	0.668212	0.0232244	2.46967e-28	9.82097e-27	3.93555e-31	4.49338e-21	2.42724e-14	1.23827e-15	28.4652	28.1034	27.0698	28.9821	28.4434	27.954	0.923531	0.994463	0.892714	0.999138	0.870726	0.938054	87.1254	94.3718	88.0458	87.2628	63.0317	71.6206
A0A1I9LSS9	AT3G51860	Vacuolar cation/proton exchanger;Vacuolar cation/proton exchanger;Vacuolar cation/proton exchanger 1;Vacuolar cation/proton exchanger 3	2.36768e-26	0.919266	51289.2	TAHNMSSSSLR	TRUE	_TAHNM[Oxidation]SSSS[Phospho]LR_.2	_TAHNM[Oxidation]SSSS[Phospho]LR_	_TAHNM[+16]SSSS[+80]LR_	FALSE	1.99771e+06	2.85516e+06		1.19946e+06	1.62455e+06		0.581926	0.168117	1.16323e-18	7.16125e-07		8.38806e-21	1.6419e-10		27.1401	26.5323		27.9313	27.2416		0.823799	0.85449		0.906949	0.827677		44.685	48.687		40.4955	48.0713
A0A1I9LSS9	AT3G51860	Vacuolar cation/proton exchanger;Vacuolar cation/proton exchanger;Vacuolar cation/proton exchanger 1;Vacuolar cation/proton exchanger 3	2.36768e-26	0.919266	51289.2	TAHNMSSSSLR	TRUE	_TAHNMS[Phospho]SSSLR_.2	_TAHNMS[Phospho]SSSLR_	_TAHNMS[+80]SSSLR_	FALSE	16715239	23077710	26308490	17068902	17140898	16616178	0.768909	0.145598	7.3527e-55	6.3851e-44	2.3484e-46	2.42791e-36	8.42792e-23	6.21064e-29	38.7698	38.3926	37.9408	39.1945	38.8743	38.5688	0.996557	0.999085	0.999091	0.99807	0.997695	0.996554	28.7899	32.8417	36.1301	33.4209	44.4015	40.9869
A0A1I9LSY6	AT3G10380	Subunit of exocyst complex 8;Exocyst complex component SEC8	5.32443e-14	0.888655	114453	ASQHDINTPR	TRUE	_ASQHDINT[Phospho]PR_.2	_ASQHDINT[Phospho]PR_	_ASQHDINT[+80]PR_	FALSE	5218017	5.67752e+06	7.49828e+06	6354116	6.54767e+06	6675111	1.06432	0.604499	4.28902e-24	1.47296e-21	2.635e-25	8.22002e-16	2.25717e-12	3.29525e-13	31.8543	31.327	30.9033	32.4209	31.7419	31.5468	1	1	1	1	1	1	41.7752	53.3657	55.9862	58.5994	64.3973	58.1616
A0A1I9LSY6	AT3G10380	Subunit of exocyst complex 8;Exocyst complex component SEC8	5.32443e-14	0.888655	114453	GLTNGSYR	TRUE	_GLTNGS[Phospho]YR_.2	_GLTNGS[Phospho]YR_	_GLTNGS[+80]YR_	FALSE	625196	723437	817518	990058	1.00607e+06		1.38226	0.0312048	7.48897e-13	1.62061e-13	4.79123e-22	3.43794e-12	7.83171e-08		39.7952	39.7871	39.4591	39.9353	40.0458		0.999953	0.999711	0.996715	0.999655	0.999016		12.8622	12.3121	8.98332	17.4712	13.9135
A0A1I9LSY6	AT3G10380	Subunit of exocyst complex 8;Exocyst complex component SEC8	5.32443e-14	0.888655	114453	NQAASPR	TRUE	_NQAAS[Phospho]PR_.2	_NQAAS[Phospho]PR_	_NQAAS[+80]PR_	FALSE	175699	145141	230939	2996.71	204389	190152	0.720465	0.500948	1.31547e-17	2.99177e-05	0.000130342	0.000109023	6.88088e-06	0.000296432	11.3178	11.2956	11.0162	25.6651	11.3413	11.2149	1	1	1	1	1	1
A0A1I9LT02	AT3G03250	UTP--glucose-1-phosphate uridylyltransferase;UTP--glucose-1-phosphate uridylyltransferase;UTP--glucose-1-phosphate uridylyltransferase 2	2.54009e-08	0.870146	52854.7	SIPSIVELDSLK	TRUE	_S[Phospho]IPSIVELDSLK_.2	_S[Phospho]IPSIVELDSLK_	_S[+80]IPSIVELDSLK_	FALSE	1.15846e+06	808549	1135616	1.07438e+06	927497	972235	0.958579	0.741379	9.23266e-10	7.09642e-09	1.4192e-32	0.000107826	5.75025e-05	0.000294915	101.097	101.453	101.243	101.121	101.395	101.696	0.999995	0.999995	0.999997	1	0.999955	0.999997	18.8768	18.1974	18.8563	19.9676	18.5687	15.9365
A0A1I9LT06	AT3G44690	Uncharacterized protein	1.45911e-15	0.89279	134563	LSSPSPTSDR	TRUE	_LSS[Phospho]PSPTSDR_.2	_LSS[Phospho]PSPTSDR_	_LSS[+80]PSPTSDR_	FALSE	82112.6	86782.4	137940	130641	114020	107146	1.14657	0.478421	1.18944e-08	5.92919e-10	2.3311e-19	9.10972e-22	2.5875e-17	1.98004e-10	29.3575	29.1963	28.5184	29.366	29.259	29.126	0.829876	0.808101	0.857217	0.836387	0.830286	0.834718	9.39167	12.0128	12.44	12.2689	9.6803	15.7025
A0A1I9LT22	AT3G57300	DNA helicase INO80-like protein;Chromatin-remodeling ATPase INO80;Chromatin-remodeling ATPase INO80	8.54526e-13	0.88531	143242	ALSPSNSTPNFSLK	TRUE	_ALS[Phospho]PSNSTPNFSLK_.2	_ALS[Phospho]PSNSTPNFSLK_	_ALS[+80]PSNSTPNFSLK_	FALSE	759621	979432	893556	942144	937615	787280	1.01308	0.895117	0.000616423	0.000368325	0.000196287	0.00140017	0.000201932	0.000297862	72.6302	72.9428	72.9721	72.6894	72.8432	73.0652	0.961165	0.999795	0.999988	0.996189	0.999979	0.999997	8.1226	15.8305	18.6188	10.9252	16.5673	16.7556
A0A1I9LT31	AT3G61690	Nucleotidyltransferase	1.05038e-18	0.900861	139217	GDDLENSHSPVR	TRUE	_GDDLENSHS[Phospho]PVR_.2	_GDDLENSHS[Phospho]PVR_	_GDDLENSHS[+80]PVR_	FALSE	961926	998832	1170626	1084716	1.09127e+06	1.22829e+06	1.08715	0.31653	1.23893e-32	5.52433e-14	1.0889e-19	5.5061e-22	1.51225e-11	6.85015e-11	37.1488	37.1709	36.5947	37.7275	37.4992	37.1787	0.99995	1	1	1	1	1	10.9057	41.4622	22.9591	25.9433	33.8177	19.7383
A0A1I9LT31	AT3G61690	Nucleotidyltransferase	1.05038e-18	0.900861	139217	GDDLENSHSPVR	TRUE	_GDDLENSHS[Phospho]PVR_.3	_GDDLENSHS[Phospho]PVR_	_GDDLENSHS[+80]PVR_	FALSE	346062	288224	436349	391683	410473	447164	1.1669	0.265739	0.000484971	0.00144872	0.000325522	0.000344424	1.3267e-05	0.000356914	37.2054	37.2584	36.5591	37.7072	37.5405	37.2045	0.981617	0.997471	0.997109	0.997308	1	0.998786	4.97778	6.97741	6.84337	6.91476	16.6138	7.71269
A0A1I9LT31	AT3G61690	Nucleotidyltransferase	1.05038e-18	0.900861	139217	SLESETLSSGVR	TRUE	_S[Phospho]LESETLSSGVR_.2	_S[Phospho]LESETLSSGVR_	_S[+80]LESETLSSGVR_	FALSE	185632	107876	116912	75062.2	155249	103138	0.812456	0.492231	1.03635e-10	1.10322e-16	7.46918e-18	0.000487649	2.78685e-06	1.64946e-11	59.5048	59.6745	59.4739	59.4008	59.7155	59.6791	0.999728	0.999737	0.999745	0.999946	0.999998	0.999983	11.3772	10.6294	10.6614	12.219	15.6888	13.3496
A0A1I9LT44	AT3G23540	Alpha/beta-Hydrolases superfamily protein	1.63808e-30	0.927992	59723.9	ANQSETDSASSPVTR	TRUE	_ANQSETDSASS[Phospho]PVTR_.2	_ANQSETDSASS[Phospho]PVTR_	_ANQSETDSASS[+80]PVTR_	FALSE	993778	1.1327e+06	1.33072e+06	1.10164e+06	1.21091e+06	1.48228e+06	1.09766	0.49355	5.5024e-22	1.01987e-18	1.18725e-26	1.28842e-35	1.49331e-22	1.61041e-17	29.3483	29.1408	28.4472	29.372	29.2959	29.1782	0.999043	0.999316	0.998187	0.989004	0.999607	0.999623	45.043	45.2419	38.558	32.0932	42.9114	47.6943
A0A1I9LT48	AT3G25690	Hydroxyproline-rich glycoprotein family protein;Protein CHUP1, chloroplastic	9.08707e-28	0.922338	112198	DDSSVQSSPSR	TRUE	_DDSS[Phospho]VQS[Phospho]S[Phospho]PSR_.2	_DDSS[Phospho]VQS[Phospho]S[Phospho]PSR_	_DDSS[+80]VQS[+80]S[+80]PSR_	FALSE	384551	356942	428948	261041	286615	295649	0.720502	0.00958184	9.70903e-05	4.19315e-07	4.02994e-11	0.00011087	6.79763e-05	1.89935e-08	15.7755	15.6437	15.7244	15.5036	15.3129	15.6508	0.996203	0.990133	0.997203	0.980015	0.983007	0.994801	25.9531	22.6694	32.9542	23.9184	22.4538	19.9154
A0A1I9LT48	AT3G25690	Hydroxyproline-rich glycoprotein family protein;Protein CHUP1, chloroplastic	9.08707e-28	0.922338	112198	LINSVINQTR	TRUE	_LINS[Phospho]VINQTR_.2	_LINS[Phospho]VINQTR_	_LINS[+80]VINQTR_	FALSE	164596	167408	131452	160006	149511	98557.3	0.880502	0.452665	0.00377497	4.40771e-10	1.28543e-07	0.000361675	0.00250936	0.00399532	72.8822	73.6867	73.7641	73.1106	73.6337	73.6716	0.999843	0.997523	0.999736	0.999989	0.971412	0.999626	9.75791	6.9982	9.23984	12.3843	5.80493	8.88948
A0A1I9LT48	AT3G25690	Hydroxyproline-rich glycoprotein family protein;Protein CHUP1, chloroplastic	9.08707e-28	0.922338	112198	LMLEYAGSER	TRUE	_LM[Oxidation]LEYAGS[Phospho]ER_.2	_LM[Oxidation]LEYAGS[Phospho]ER_	_LM[+16]LEYAGS[+80]ER_	FALSE	6.63905e+06	6.13728e+06	5998446	5312430	4964723	4.79823e+06	0.802959	0.00748572	2.6779e-52	1.64682e-27	2.22729e-32	7.6607e-35	1.00487e-20	1.53411e-14	60.8368	61.2543	61.2897	61.0553	61.3412	61.2889	0.999993	0.999999	0.999995	0.999121	0.999846	0.999994	26.7681	27.1423	18.17	16.6933	20.0821	25.3404
A0A1I9LT48	AT3G25690	Hydroxyproline-rich glycoprotein family protein;Protein CHUP1, chloroplastic	9.08707e-28	0.922338	112198	LMLEYAGSER	TRUE	_LMLEYAGS[Phospho]ER_.2	_LMLEYAGS[Phospho]ER_	_LMLEYAGS[+80]ER_	FALSE	7.25489e+06	5.97283e+06	5.47216e+06	5632753	4450261	4485894	0.779091	0.104416	1.69954e-10	1.28419e-41	4.93581e-38	6.08951e-09	1.73325e-18	1.78094e-17	68.0067	68.702	68.8702	68.1309	68.663	69.0897	0.998951	0.99983	0.999945	0.999819	0.999987	0.997823	7.85845	9.68241	10.8094	9.61658	12.2818	7.12782
A0A1I9LT48	AT3G25690	Hydroxyproline-rich glycoprotein family protein;Protein CHUP1, chloroplastic	9.08707e-28	0.922338	112198	LSSSMNK	TRUE	_LSSS[Phospho]M[Oxidation]NK_.2	_LSSS[Phospho]M[Oxidation]NK_	_LSSS[+80]M[+16]NK_	FALSE	229495	276215	374662	222914	105704	294086	0.707319	0.284841	0.000294012	7.61219e-06	0.00113186	0.000107846	0.00284003	0.00169922	12.9192	12.8846	12.8393	13.0462	12.238	12.8233	0.959683	0.948625	0.912247	0.963222	0.979062	0.946477	16.1023	12.9763	9.77211	11.1462	10.7198	11.7414
A0A1I9LT48	AT3G25690	Hydroxyproline-rich glycoprotein family protein;Protein CHUP1, chloroplastic	9.08707e-28	0.922338	112198	SFYGGSPGR	TRUE	_S[Phospho]FYGGS[Phospho]PGR_.2	_S[Phospho]FYGGS[Phospho]PGR_	_S[+80]FYGGS[+80]PGR_	FALSE	5024498	5.05605e+06	5.8859e+06	4.12763e+06	4256032	4.30048e+06	0.794425	0.0188494	9.84357e-35	7.6349e-28	1.90867e-31	3.4266e-27	1.2092e-15	2.53331e-17	44.6217	44.3378	44.477	44.4601	44.2942	44.3758	1	1	1	1	1	1	53.3273	49.0989	49.693	47.3108	50.1355	49.5366
A0A1I9LT48	AT3G25690	Hydroxyproline-rich glycoprotein family protein;Protein CHUP1, chloroplastic	9.08707e-28	0.922338	112198	SFYGGSPGR	TRUE	_S[Phospho]FYGGSPGR_.2	_S[Phospho]FYGGSPGR_	_S[+80]FYGGSPGR_	FALSE	249254	1896385	262710	2.40685e+06	3.88914e+06	1020459	3.03795	0.174614	0.000200344	0.000409848	2.0697e-14	9.24941e-05	0.000283206	5.76151e-14	43.3572	43.5037	43.273	43.6266	43.5061	43.4649	1	0.999356	0.999929	1	0.999968	0.999971	18.0691	15.6594	18.1387	22.9973	16.7863	19.1137
A0A1I9LT48	AT3G25690	Hydroxyproline-rich glycoprotein family protein;Protein CHUP1, chloroplastic	9.08707e-28	0.922338	112198	SVDNVLDEK	TRUE	_S[Phospho]VDNVLDEK_.2	_S[Phospho]VDNVLDEK_	_S[+80]VDNVLDEK_	FALSE	347775	412374	373540	427965	452645	562184	1.27266	0.0853876	0.000533019	4.68189e-05	3.29174e-25	0.000110013	1.95863e-08	1.63605e-09	54.1251	54.2916	54.0577	54.207	54.2749	54.1433	1	1	1	1	1	1
A0A1I9LT48	AT3G25690	Hydroxyproline-rich glycoprotein family protein;Protein CHUP1, chloroplastic	9.08707e-28	0.922338	112198	SKDDSSVQSSPSR	TRUE	_SKDDSS[Phospho]VQS[Phospho]S[Phospho]PSR_.2	_SKDDSS[Phospho]VQS[Phospho]S[Phospho]PSR_	_SKDDSS[+80]VQS[+80]S[+80]PSR_	FALSE	1.44728e+06	1.26374e+06	1.58866e+06	1.19309e+06	993560	953324	0.730281	0.0320413	6.52944e-26	2.88501e-19	2.14247e-22	6.49369e-19	5.35242e-15	3.36908e-10	16.2487	16.1282	16.1172	15.9885	15.7966	16.1512	0.992364	0.999617	0.967704	0.933981	0.992266	0.995431	46.3805	63.8275	43.8367	64.5064	50.8276	52.2403
A0A1I9LT48	AT3G25690	Hydroxyproline-rich glycoprotein family protein;Protein CHUP1, chloroplastic	9.08707e-28	0.922338	112198	SKDDSSVQSSPSR	TRUE	_SKDDSS[Phospho]VQSS[Phospho]PSR_.2	_SKDDSS[Phospho]VQSS[Phospho]PSR_	_SKDDSS[+80]VQSS[+80]PSR_	FALSE	1.11454e+06	1353720	1.8191e+06	873090	1.07119e+06	1.01083e+06	0.689262	0.10778	4.26251e-11	3.91927e-12	1.34762e-15	3.61912e-13	8.13683e-08	1.5433e-08	18.1191	18.0008	17.6314	18.1401	18.2401	17.93	0.969688	0.997987	0.998865	0.76961	0.967034	0.996227	46.3203	42.5031	46.0173	37.6452	43.5977	42.3261
A0A1I9LT48	AT3G25690	Hydroxyproline-rich glycoprotein family protein;Protein CHUP1, chloroplastic	9.08707e-28	0.922338	112198	SKDDSSVQSSPSR	TRUE	_SKDDSSVQS[Phospho]S[Phospho]PSR_.2	_SKDDSSVQS[Phospho]S[Phospho]PSR_	_SKDDSSVQS[+80]S[+80]PSR_	FALSE	695285	818888	1.02125e+06		663601	661285	0.783825	0.233124	8.28648e-05	5.58555e-12	8.84371e-08		0.000154158	0.000233501	19.4692	19.7613	19.6406		19.814	19.4883	0.991843	0.999038	0.996107		0.993559	0.99767	30.6257	40.8819	31.5035		23.109	36.9872
A0A1I9LT48	AT3G25690	Hydroxyproline-rich glycoprotein family protein;Protein CHUP1, chloroplastic	9.08707e-28	0.922338	112198	SKDDSSVQSSPSR	TRUE	_SKDDSSVQSS[Phospho]PSR_.2	_SKDDSSVQSS[Phospho]PSR_	_SKDDSSVQSS[+80]PSR_	FALSE	6.88784e+06	8.00938e+06	10477338	5902222	6476035	6925199	0.76074	0.139852	2.04089e-08	6.94689e-10	1.16234e-17	0.000107826	2.39685e-06	2.61366e-09	23.8521	23.8608	22.9348	24.5326	24.2626	23.507	0.999232	0.994228	0.999549	0.994333	0.999399	0.998932	50.8414	45.9928	53.4601	49.957	67.7776	49.802
A0A1I9LT68	AT3G61710	AUTOPHAGY 6;Beclin-1-like protein	0.000518526	0.794494	53097	GASSPQPDATQSGK	TRUE	_GASS[Phospho]PQPDATQSGK_.2	_GASS[Phospho]PQPDATQSGK_	_GASS[+80]PQPDATQSGK_	FALSE	234352	240232	215331	214264	275652	301388	1.14696	0.277556	0.000205841	0.000391125	6.60648e-07	0.000167385	5.31077e-05	0.000325284	21.9349	21.9579	21.5525	21.9316	21.9063	21.7856	0.872542	0.924832	0.993073	0.943716	0.951271	0.98259	19.3922	16.2328	29.585	23.7007	24.6706	19.981
A0A1I9LTA1	AT3G48060	BAH and TFIIS domain-containing protein	4.99756e-20	0.904206	172358	ATPGLSPK	TRUE	_ATPGLS[Phospho]PK_.2	_ATPGLS[Phospho]PK_	_ATPGLS[+80]PK_	FALSE	1.0958e+06	1.59004e+06	1.9476e+06	1.82497e+06	1.76999e+06	1.82126e+06	1.16894	0.351379	1.70701e-48	0.000362245	2.28284e-06	8.77291e-10	7.78389e-21	1.69239e-05	35.7283	35.7642	35.3234	35.9077	35.802	35.7581	0.992863	0.999206	0.999923	0.999875	0.999999	0.994792	5.93531	8.13713	10.4727	9.98381	14.4764	6.25225
A0A1I9LTA1	AT3G48060	BAH and TFIIS domain-containing protein	4.99756e-20	0.904206	172358	GRSPAQSVSGGSLEDPAPVNSR	TRUE	_GRS[Phospho]PAQSVSGGSLEDPAPVNSR_.3	_GRS[Phospho]PAQSVSGGSLEDPAPVNSR_	_GRS[+80]PAQSVSGGSLEDPAPVNSR_	FALSE	1.67233e+06	2.12168e+06	2.44952e+06	376961	2.15746e+06	2553759	0.814954	0.61455	5.62667e-27	3.03288e-16	2.22775e-23	0.00011434	2.26728e-05	2.41574e-12	55.3699	56.1468	56.559	55.9831	56.2499	56.537	0.999933	0.99781	0.996134	0.98938	0.999058	0.996829	28.8566	32.585	24.0275	16.9529	30.5991	28.9655
A0A1I9LTA1	AT3G48060	BAH and TFIIS domain-containing protein	4.99756e-20	0.904206	172358	NAGAGGVSEVLAAVK	TRUE	_NAGAGGVS[Phospho]EVLAAVK_.2	_NAGAGGVS[Phospho]EVLAAVK_	_NAGAGGVS[+80]EVLAAVK_	FALSE	477014	430008	371213	457251	371754	367628	0.93616	0.555274	4.40439e-31	7.56656e-10	0.00321394	0.000186831	5.6199e-12	7.28249e-07	92.1733	92.7933	92.4408	92.3729	92.754	92.9694	1	1	1	1	1	1
A0A1I9LTA1	AT3G48060	BAH and TFIIS domain-containing protein	4.99756e-20	0.904206	172358	SMNSPTTSQPK	TRUE	_SMNS[Phospho]PTTSQPK_.2	_SMNS[Phospho]PTTSQPK_	_SMNS[+80]PTTSQPK_	FALSE	175661	322776	316254	401713	488560	449406	1.6444	0.031945	1.07766e-14	1.33176e-08	5.88424e-11	4.99158e-12	2.41781e-06	6.67178e-11	27.6544	27.6011	27.2151	27.5822	27.6025	27.3897	0.99683	0.999953	0.999692	0.997276	0.999992	0.999999	12.5201	16.0352	14.767	15.107	18.7189	22.8664
A0A1I9LTA1	AT3G48060	BAH and TFIIS domain-containing protein	4.99756e-20	0.904206	172358	SSNSDTEDLQR	TRUE	_SSNS[Phospho]DTEDLQR_.2	_SSNS[Phospho]DTEDLQR_	_SSNS[+80]DTEDLQR_	FALSE	1.88428e+06	2.01994e+06	2223074	1.89041e+06	2.44847e+06	2.18475e+06	1.06468	0.522777	7.65052e-26	1.1037e-28	1.24697e-30	1.19141e-22	1.88058e-15	9.17053e-20	32.8383	32.8241	32.4893	33.1424	32.6943	32.8063	0.999999	0.999993	0.999987	1	1	0.999994	31.0792	30.0867	24.6379	33.7692	40.1567	31.3612
A0A1I9LTA1	AT3G48060	BAH and TFIIS domain-containing protein	4.99756e-20	0.904206	172358	TSDADGDEAGECTSAAR	TRUE	_TSDADGDEAGEC[Carbamidomethyl]TS[Phospho]AAR_.2	_TSDADGDEAGEC[Carbamidomethyl]TS[Phospho]AAR_	_TSDADGDEAGEC[+57]TS[+80]AAR_	FALSE	329234	366752	552185	386732	406747	495817	1.03295	0.866741	0.000206686	0.000316043	2.11265e-15	0.000125655	0.000327213	8.78138e-10	29.349	29.0647	28.479	29.4498	29.2352	29.2867	0.947726	0.996203	0.995094	0.991783	0.998199	0.996228	25.7854	34.5719	38.342	32.6767	40.9695	42.2885
A0A1I9LTA1	AT3G48060	BAH and TFIIS domain-containing protein	4.99756e-20	0.904206	172358	VSSPVHTVK	TRUE	_VSS[Phospho]PVHTVK_.2	_VSS[Phospho]PVHTVK_	_VSS[+80]PVHTVK_	FALSE	488486	524790	791718	579331	647921	749287	1.09504	0.623249	7.74827e-12	8.37589e-14	7.16263e-24	3.16074e-11	3.40122e-12	8.50771e-12	31.212	30.7921	30.3356	31.825	31.1926	31.0741	0.992951	0.99456	0.999889	0.999618	0.999998	0.999219	16.3462	16.7947	24.6957	23.8083	25.9385	21.818
A0A1I9LTD0	AT3G06290	SAC3/GANP/Nin1/mts3/eIF-3 p25 family;SAC3 family protein B	5.21236e-11	0.879929	187878	ATSPPATSHILSR	TRUE	_ATS[Phospho]PPATSHILSR_.2	_ATS[Phospho]PPATSHILSR_	_ATS[+80]PPATSHILSR_	FALSE	786279	585105	593277	641447	694213	678385	1.02514	0.819513	1.07705e-39	4.57944e-12	2.12756e-18	3.44671e-23	4.23213e-15	5.45645e-16	52.2784	52.7204	52.5924	52.3758	53.1037	53.1717	0.978203	0.970312	0.919269	0.886409	0.904702	0.915196	9.70612	12.407	15.2468	17.5324	14.8655	14.2942
A0A1I9LTD0	AT3G06290	SAC3/GANP/Nin1/mts3/eIF-3 p25 family;SAC3 family protein B	5.21236e-11	0.879929	187878	LYSPFGSPK	TRUE	_LYSPFGS[Phospho]PK_.2	_LYSPFGS[Phospho]PK_	_LYSPFGS[+80]PK_	FALSE	51018.6	90803.5	12764.7	256775	241643	168741	4.31576	0.00839934	0.00282137	0.000581106	0.00126567	1.73399e-12	5.1279e-06	1.11942e-10	74.166	74.7552	74.8038	74.1627	74.5636	74.8489	0.990849	0.929141	0.996172	0.999875	0.999967	0.999935	6.37787	4.26672	7.25485	10.6798	12.0201	11.3321
A0A1I9LTL7	AT3G13060	Evolutionarily conserved C-terminal region 5	1.0982e-08	0.871654	68466.3	SFAQVVR	TRUE	_S[Phospho]FAQVVR_.2	_S[Phospho]FAQVVR_	_S[+80]FAQVVR_	FALSE	67848.2		57506.9	204189	89549.3	127159	2.23843	0.173971	0.000201432		4.83086e-05	0.000160664	3.65721e-06	0.00130862	53.2227		53.0461	53.1973	53.5415	53.3333	1		1	1	1	1
A0A1I9LTS8	AT3G27550	RNA-binding CRS1 / YhbY (CRM) domain protein;CRM-domain containing factor CFM9, mitochondrial	9.48759e-08	0.867615	63224.2	EESEPGDEDSDQEELDR	TRUE	_EES[Phospho]EPGDEDS[Phospho]DQEELDR_.2	_EES[Phospho]EPGDEDS[Phospho]DQEELDR_	_EES[+80]EPGDEDS[+80]DQEELDR_	FALSE	316979	294242	311917	345167	390739	370905	1.19896	0.0146923	0.00236358	5.67587e-07	4.20636e-11	0.000313594	4.89642e-09	4.02812e-06	46.8713	46.5885	46.7293	46.5081	46.6976	46.656	1	1	1	1	1	1
A0A1I9LTS8	AT3G27550	RNA-binding CRS1 / YhbY (CRM) domain protein;CRM-domain containing factor CFM9, mitochondrial	9.48759e-08	0.867615	63224.2	EESEPGDEDSDQEELDR	TRUE	_EESEPGDEDS[Phospho]DQEELDR_.2	_EESEPGDEDS[Phospho]DQEELDR_	_EESEPGDEDS[+80]DQEELDR_	FALSE	1.39374e+06	1.40626e+06	1672810	1.57014e+06	1.7058e+06	1643928	1.09995	0.207071	2.18738e-17	6.78186e-17	5.45574e-21	3.22005e-18	1.58335e-08	2.20544e-12	44.6726	44.4195	44.4666	44.6338	44.4679	44.5342	0.999997	0.999997	0.999998	0.999996	1	1	13.7148	13.5669	14.1428	13.5247	17.5958	18.4396
A0A1P8AM10	AT1G03010	Phototropic-responsive NPH3 family protein;Phototropic-responsive NPH3 family protein;BTB/POZ domain-containing protein At1g03010	1.61627e-09	0.874835	71364.1	SGSGAGSGAISPR	TRUE	_SGSGAGSGAIS[Phospho]PR_.2	_SGSGAGSGAIS[Phospho]PR_	_SGSGAGSGAIS[+80]PR_	FALSE	171360	188365	342352	2.39663e+06	350247	411053	4.49798	0.291586	0.00119969	6.40314e-18	1.0299e-23	6.97276e-10	2.23241e-10	4.53956e-12	30.0222	29.8325	29.3087	30.1864	30.0948	29.9607	0.99999	0.999994	0.999592	0.999991	1	0.999987	15.0354	19.1243	15.5303	20.5512	19.8579	16.0423
A0A1P8AM23	AT1G18700	DNAJ heat shock N-terminal domain-containing protein;DNAJ heat shock N-terminal domain-containing protein;DNAJ heat shock N-terminal domain-containing protein;At1g18700/F6A14_19	1.66364e-12	0.884482	83788.4	DAVQILSSGSDSD	TRUE	_DAVQILS[Phospho]S[Phospho]GS[Phospho]DS[Phospho]D_.2	_DAVQILS[Phospho]S[Phospho]GS[Phospho]DS[Phospho]D_	_DAVQILS[+80]S[+80]GS[+80]DS[+80]D_	FALSE	1.91474e+06	1.665e+06	1.39779e+06	1.69348e+06	1.50631e+06	1.03186e+06	0.850148	0.371214	1.55013e-25	0.000213427	4.29954e-19	7.90991e-07	2.41023e-06	0.000358048	74.8198	72.4938	74.2535	73.999	72.3655	73.5623	1	1	1	1	1	1
A0A1P8AM23	AT1G18700	DNAJ heat shock N-terminal domain-containing protein;DNAJ heat shock N-terminal domain-containing protein;DNAJ heat shock N-terminal domain-containing protein;At1g18700/F6A14_19	1.66364e-12	0.884482	83788.4	DAVQILSSGSDSD	TRUE	_DAVQILSSGS[Phospho]DS[Phospho]D_.2	_DAVQILSSGS[Phospho]DS[Phospho]D_	_DAVQILSSGS[+80]DS[+80]D_	FALSE	523298	530639	368515	416761	342906	403547	0.817753	0.207583	1.17306e-17	1.91239e-12	2.41725e-23	0.00010783	1.61995e-09	6.3485e-08	75.3655	74.4983	75.0399	75.023	74.2973	74.7922	0.999099	0.997042	0.991902	0.999257	0.976987	0.999688	10.0707	9.49031	9.49175	9.49022	10.2263	10.8298
A0A1P8AM51	AT1G35780	N-lysine methyltransferase	4.62195e-13	0.886068	22903.6	SDVSSPSSATAER	TRUE	_SDVSS[Phospho]PSSATAER_.2	_SDVSS[Phospho]PSSATAER_	_SDVSS[+80]PSSATAER_	FALSE		572161	465730	786974	1.11675e+06	939766	1.82645	0.04511		4.07794e-14	6.94761e-31	1.34433e-19	1.73253e-14	3.10361e-12		33.1813	32.8768	33.3294	32.9738	33.0389		0.985221	0.967642	0.998854	0.997541	0.963995		21.6785	16.3505	21.9202	24.3796	19.9213
A0A1P8AM53	AT1G79630	Protein phosphatase 2C family protein;Protein phosphatase 2C family protein;Probable protein phosphatase 2C 18;Probable protein phosphatase 2C 6	1.86087e-09	0.87461	55304.4	VNSLLSIPR	TRUE	_VNS[Phospho]LLSIPR_.2	_VNS[Phospho]LLSIPR_	_VNS[+80]LLSIPR_	FALSE	1.50836e+06	1643993	1.42103e+06	1.50249e+06	1445115	1.35751e+06	0.941342	0.312053	1.00288e-21	1.74703e-18	8.23905e-21	3.03316e-18	2.55185e-11	2.36194e-12	77.7605	78.2222	78.0566	77.7678	78.1704	78.3765	1	1	1	1	1	1	33.482	34.3675	29.2961	26.6759	32.6482	24.5588
A0A1P8AMD5	AT1G09230	RNA-binding (RRM/RBD/RNP motifs) family protein;RNA-binding (RRM/RBD/RNP motifs) family protein;U11/U12 small nuclear ribonucleoprotein 65 kDa protein	4.63212e-08	0.869021	46111.5	EESENEDPADEPK	TRUE	_EES[Phospho]ENEDPADEPK_.2	_EES[Phospho]ENEDPADEPK_	_EES[+80]ENEDPADEPK_	FALSE	606247	782239	860554	850413	903150	855543	1.1601	0.194284	3.74844e-11	1.17212e-10	2.66021e-26	5.20516e-19	1.25271e-12	3.05671e-11	32.052	31.8801	31.8568	32.4338	31.8472	32.1138	1	1	1	1	1	1
A0A1P8AMI1	AT1G73150	Global transcription factor group E3;Transcription factor GTE3, chloroplastic	4.29613e-07	0.864398	48309.2	AESMTNPVKPAVLPVVPEK	TRUE	_AESM[Oxidation]T[Phospho]NPVKPAVLPVVPEK_.3	_AESM[Oxidation]T[Phospho]NPVKPAVLPVVPEK_	_AESM[+16]T[+80]NPVKPAVLPVVPEK_	FALSE		511002	566465		756396	810738	1.45446	0.0242354		1.54437e-06	9.68117e-05		5.07597e-13	4.51668e-09		71.5636	71.6207		71.7857	71.8854		0.906536	0.884902		0.790822	0.778142		12.2234	8.25192		22.5655	19.2724
A0A1P8AMI1	AT1G73150	Global transcription factor group E3;Transcription factor GTE3, chloroplastic	4.29613e-07	0.864398	48309.2	EEQGLDSER	TRUE	_EEQGLDS[Phospho]ER_.2	_EEQGLDS[Phospho]ER_	_EEQGLDS[+80]ER_	FALSE	69950.1	84840	101478	78163.5	77778.1	73447.5	0.895114	0.386689	0.000204992	1.85239e-12	1.29896e-10	0.000326362	0.0010339	0.00111363	29.9737	29.7379	29.229	30.1839	29.923	29.866	1	1	1	1	1	1
A0A1P8AMI1	AT1G73150	Global transcription factor group E3;Transcription factor GTE3, chloroplastic	4.29613e-07	0.864398	48309.2	LVEEASANR	TRUE	_LVEEAS[Phospho]ANR_.2	_LVEEAS[Phospho]ANR_	_LVEEAS[+80]ANR_	FALSE	636173	568164	897141	587701	727134	696073	0.956902	0.795177	1.39826e-10	5.44843e-21	4.35245e-15	1.55141e-11	1.02565e-07	1.03711e-08	29.9075	29.7484	29.1933	30.0711	29.9028	29.8765	1	1	1	1	1	1
A0A1P8AMJ7	AT1G11310	MLO-like protein;MLO-like protein 2	5.49455e-22	0.909089	58392.3	HSGSNTPFSSR	TRUE	_HS[Phospho]GSNTPFSSR_.2	_HS[Phospho]GSNTPFSSR_	_HS[+80]GSNTPFSSR_	FALSE	842020	1.05349e+06	861710	1.07936e+06	970303	798131	1.03285	0.790052	2.6584e-07	5.61086e-06	0.00101134	1.31479e-16	2.3413e-05	0.000274122	42.2339	42.2418	41.7318	42.6423	42.5681	42.4191	0.995817	0.995014	0.999023	0.999919	0.999366	0.936574	11.2661	10.3374	11.4655	15.7234	15.2029	11.3502
A0A1P8AMJ7	AT1G11310	MLO-like protein;MLO-like protein 2	5.49455e-22	0.909089	58392.3	SVENYPSSPSPR	TRUE	_SVENYPSSPS[Phospho]PR_.2	_SVENYPSSPS[Phospho]PR_	_SVENYPSSPS[+80]PR_	FALSE	17517260	23048424	26749928	24003520	23515924	25640424	1.08682	0.519019	5.25311e-46	2.09994e-32	2.49767e-41	2.73788e-29	1.4088e-23	5.48308e-26	42.0651	42.2425	42.1024	42.1962	42.3841	42.266	1	0.999997	1	1	1	1	66.9533	54.6517	62.1035	56.6374	47.7681	52.5992
A0A1P8AMK4	AT1G70620	Cyclin-like protein	4.67043e-13	0.886055	102249	DLSDEVSTDR	TRUE	_DLS[Phospho]DEVSTDR_.2	_DLS[Phospho]DEVSTDR_	_DLS[+80]DEVSTDR_	FALSE	55293.8	78058	99722.6	78444.9	98336.3	86813.3	1.13095	0.509473	0.000205579	3.20043e-05	4.81605e-21	9.36032e-11	4.60715e-14	5.0517e-07	48.8225	48.8942	48.731	48.9205	48.8638	48.8539	0.999777	0.998914	0.999967	0.999981	0.997847	0.999884	10.1004	8.51697	12.0168	12.5462	7.83207	10.7515
A0A1P8AMM9	AT1G05460	p-loop containing nucleoside triphosphate hydrolases superfamily protein;Probable RNA helicase SDE3	4.47241e-10	0.876815	104725	EEDEWSDGWK	TRUE	_EEDEWS[Phospho]DGWK_.2	_EEDEWS[Phospho]DGWK_	_EEDEWS[+80]DGWK_	FALSE	307853	278309	210209	466453	501730	309262	1.60408	0.0715658	0.00336528	0.00432516	0.000315265	2.5249e-11	0.00104528	0.00115925	71.2477	71.5304	71.8496	71.2773	71.5211	71.991	1	1	1	1	1	1
A0A1P8AMP4	AT1G48090	Calcium-dependent lipid-binding family protein	1.8206e-11	0.88136	460331	NPVFSMER	TRUE	_NPVFS[Phospho]M[Oxidation]ER_.2	_NPVFS[Phospho]M[Oxidation]ER_	_NPVFS[+80]M[+16]ER_	FALSE	160929	226821	163402		217695	281046	1.35736	0.169917	0.00976596	0.0014732	0.00523559		0.00294732	0.00254447	48.1844	48.4248	48.0752		48.3949	48.3539	1	1	1		1	1
A0A1P8AMP4	AT1G48090	Calcium-dependent lipid-binding family protein	1.8206e-11	0.88136	460331	NPVFSMER	TRUE	_NPVFS[Phospho]MER_.2	_NPVFS[Phospho]MER_	_NPVFS[+80]MER_	FALSE	136514	124650	90951.9	195271	149545	140943	1.37954	0.109224	0.00177491	0.00141056	0.00022168	0.000297713	0.000363619	0.001225	65.2895	65.6781	65.5971	65.3831	65.7171	65.8519	1	1	1	1	1	1
A0A1P8AMP4	AT1G48090	Calcium-dependent lipid-binding family protein	1.8206e-11	0.88136	460331	SDSEKETNDESGR	TRUE	_SDS[Phospho]EKETNDESGR_.2	_SDS[Phospho]EKETNDESGR_	_SDS[+80]EKETNDESGR_	FALSE	291353	368731	454482	362017	436113	426158	1.09844	0.524553	8.92351e-05	1.71463e-15	8.65835e-09	8.55361e-09	1.92311e-09	4.76573e-05	19.0169	19.1822	18.8236	19.8124	19.3763	19.0177	0.955087	0.998516	0.9959	0.999479	0.991172	0.995018	26.3088	35.6777	30.8921	29.4604	35.2622	31.2568
A0A1P8AMQ6	AT1G55535	Transmembrane protein;Transmembrane protein;At1g55535	4.2411e-06	0.85848	27733	SLHSIDEEK	TRUE	_S[Phospho]LHSIDEEK_.2	_S[Phospho]LHSIDEEK_	_S[+80]LHSIDEEK_	FALSE	218041	209981	207958	202549	229688	173248	0.952051	0.573087	1.40646e-06	2.13586e-08	1.5968e-09	1.10916e-08	5.85345e-05	6.32047e-13	40.0135	39.9135	39.2934	40.3303	40.3798	39.9518	0.96699	0.998859	0.987796	0.99451	0.999809	0.99395	4.37738	7.77506	5.39368	6.19933	9.56189	6.10161
A0A1P8AMT7	AT1G56230	Enolase (DUF1399)	4.42496e-21	0.906838	62437.7	SLSEISEVDAVR	TRUE	_SLS[Phospho]EIS[Phospho]EVDAVR_.2	_SLS[Phospho]EIS[Phospho]EVDAVR_	_SLS[+80]EIS[+80]EVDAVR_	FALSE	3574426	3.77296e+06	3381525	3488899	3.40295e+06		0.963544	0.446951	1.42647e-28	2.31397e-26	2.82172e-26	6.96857e-19	2.50675e-15		81.7448	81.6798	81.5798	81.5955	81.6286		0.958302	0.974917	0.986123	0.989619	0.982962		21.0791	16.5937	12.82	17.066	14.8001
A0A1P8AMT7	AT1G56230	Enolase (DUF1399)	4.42496e-21	0.906838	62437.7	SLSEISEVDAVR	TRUE	_SLS[Phospho]EISEVDAVR_.2	_SLS[Phospho]EISEVDAVR_	_SLS[+80]EISEVDAVR_	FALSE	1.35746e+06	1.474e+06	1.21783e+06		1.36926e+06	1.42913e+06	1.03662	0.649214	8.35437e-09	5.4361e-09	4.84751e-19		7.65359e-10	1.44781e-08	78.4965	78.9577	78.7941		78.907	79.0049	0.875817	0.956791	0.997132		0.999343	0.996122	8.3231	23.7053	19.8914		29.9702	22.1044
A0A1P8AMW3	AT1G17940	Endosomal targeting BRO1-like domain-containing protein;Endosomal targeting BRO1-like domain-containing protein;Endosomal targeting BRO1-like domain-containing protein;At1g73390;At1g17940	0.000266351	0.824013	38131	IVVMANQEGPTITR	TRUE	_IVVMANQEGPTIT[Phospho]R_.2	_IVVMANQEGPTIT[Phospho]R_	_IVVMANQEGPTIT[+80]R_	FALSE	67470.6	98854.1		129023	65500.1	144120	1.35736	0.436969	1.6229e-06	0.000896387		0.000250968	0.000254294	2.59025e-06	65.3133	65.6313		65.2931	65.7625	65.8727	0.849313	0.995495		0.978871	0.973975	0.988753	2.72922	6.39806		4.83576	4.62231	5.47631
A0A1P8AMX7	AT1G45207	Remorin family protein	1.97197e-07	0.866113	60179.4	DAATDAQAVSR	TRUE	_DAATDAQAVS[Phospho]R_.2	_DAATDAQAVS[Phospho]R_	_DAATDAQAVS[+80]R_	FALSE	274594	282803	431566	362332	541488	615827	1.53661	0.123509	1.95174e-19	2.20498e-11	2.03285e-16	6.56285e-22	5.78457e-09	1.03356e-08	29.592	29.3848	28.7688	29.7085	29.5401	29.5452	1	1	1	1	1	1	19.9881	22.4391	17.9998	23.5884	25.4014	21.6963
A0A1P8AMX7	AT1G45207	Remorin family protein	1.97197e-07	0.866113	60179.4	WIVSPLAK	TRUE	_WIVS[Phospho]PLAK_.2	_WIVS[Phospho]PLAK_	_WIVS[+80]PLAK_	FALSE	104777	81692.4	73837.1	172330	116921	111973	1.54135	0.0938156	1.30881e-13	0.00077424	0.00129781	4.92289e-11	0.000245662	0.000292526	82.9437	83.4781	83.1934	83.0031	83.4826	83.6962	1	1	1	1	1	1
A0A1P8AN11	AT1G09140	SERINE-ARGININE PROTEIN 30;Serine/arginine-rich splicing factor SR30	0.000291356	0.815369	28352.5	FSPSVDR	TRUE	_FS[Phospho]PSVDR_.2	_FS[Phospho]PSVDR_	_FS[+80]PSVDR_	FALSE	629688	776611	807271	788363	817508	775978	1.07602	0.374481	9.59796e-09	1.09108e-05	9.21117e-14	2.42572e-07	3.55042e-05	0.000684647	42.5629	42.7218	42.5274	42.7897	42.8078	42.7447	0.999135	0.998463	0.999994	0.999943	0.99967	0.999851	8.05176	7.4762	12.996	10.7694	9.01668	9.81415
A0A1P8AN11	AT1G09140	SERINE-ARGININE PROTEIN 30;Serine/arginine-rich splicing factor SR30	0.000291356	0.815369	28352.5	RFSPSVDR	TRUE	_RFS[Phospho]PS[Phospho]VDR_.2	_RFS[Phospho]PS[Phospho]VDR_	_RFS[+80]PS[+80]VDR_	FALSE	1.30583e+06	306442	1.88573e+06	477225	275325	354802	0.316567	0.161701	0.00219395	0.00120955	0.00177657	0.000183362	0.00362582	0.008059	42.0415	42.2345	41.9865	42.2189	42.4683	42.4118	1	1	1	1	1	1
A0A1P8AN47	AT1G20910	ARID/BRIGHT DNA-binding domain-containing protein;AT-rich interactive domain-containing protein 6	0.000365852	0.80297	43681.6	VQMLSPK	TRUE	_VQMLS[Phospho]PK_.2	_VQMLS[Phospho]PK_	_VQMLS[+80]PK_	FALSE	416187	571308	578453	609014	601681	610187	1.1628	0.184153	0.00165723	3.77341e-05	0.000559859	6.57367e-08	0.00120453	0.000261937	46.435	46.6317	46.3852	46.5297	46.7899	46.4317	1	1	1	1	1	1
A0A1P8ANA3	AT1G14580	C2H2-like zinc finger protein;Protein indeterminate-domain 6, chloroplastic	3.57008e-09	0.87356	52244.2	NQPGNPNPDAEVIALSPK	TRUE	_NQPGNPNPDAEVIALS[Phospho]PK_.2	_NQPGNPNPDAEVIALS[Phospho]PK_	_NQPGNPNPDAEVIALS[+80]PK_	FALSE	11182285	17826326	16734028	8949783	17305604	17317718	0.952571	0.844833	6.62225e-28	4.76204e-24	5.73031e-31	8.32946e-20	2.82545e-14	2.25441e-18	69.8145	70.4288	70.4092	70.0991	70.2789	70.52	1	1	1	1	1	1
A0A1P8ANC2	AT1G50700	Calcium-dependent protein kinase 33	0.00213504	0.761368	61642.5	SVEIENR	TRUE	_S[Phospho]VEIENR_.2	_S[Phospho]VEIENR_	_S[+80]VEIENR_	FALSE	152420	210024	232177	209459	215280	214737	1.07543	0.564614	0.000342107	0.000944435	0.000435541	0.00604496	0.00396599	0.000358005	35.4387	35.4509	34.9785	35.6257	35.5276	35.5453	1	1	1	1	1	1
A0A1P8AND3	AT1G75310	Auxin-like 1 protein;Auxilin-like protein 1	5.61803e-11	0.879822	162175	SLQDGGASQAESK	TRUE	_S[Phospho]LQDGGASQAESK_.2	_S[Phospho]LQDGGASQAESK_	_S[+80]LQDGGASQAESK_	FALSE	190438	226835	399354	343499	334693	377927	1.29327	0.291603	1.59002e-10	3.7641e-08	1.34554e-16	1.88996e-12	1.09698e-05	9.088e-08	30.1458	29.9562	29.6187	30.4644	30.203	30.2381	1	1	1	1	1	1	22.1658	32.1682	30.1466	28.1288	41.7907	29.6412
A0A1P8ANH4	AT1G63670	DUF3741 domain-containing protein;Uncharacterized protein F24D7.14	0.0002893	0.816169	58377	SPGPAIFPK	TRUE	_S[Phospho]PGPAIFPK_.2	_S[Phospho]PGPAIFPK_	_S[+80]PGPAIFPK_	FALSE	18882.8	12360	17752.3	21603.7	10506.5	1.09138	0.655397	0.438887	0.00239753	0.000172162	5.7695e-14	0.00113633	0.000358452	0.000498547	64.7769	65.0273	64.9762	64.7935	65.0974	65.1704	1	1	1	1	1	1
A0A1P8ANH8	AT1G66880	Protein kinase superfamily protein;Protein kinase superfamily protein;LEAF RUST 10 DISEASE-RESISTANCE LOCUS RECEPTOR-LIKE PROTEIN KINASE-like 1.4	5.26267e-25	0.91619	102109	NSVPPPISPETDK	TRUE	_NSVPPPISPET[Phospho]DK_.2	_NSVPPPISPET[Phospho]DK_	_NSVPPPISPET[+80]DK_	FALSE	76169.3		663462	3875.56	1.47885e+06	800794	2.05825	0.555933	0.000135999		0.000124752	0.000333347	3.09183e-09	0.00122197	50.3486		50.1535	51.3513	48.5484	48.5383	0.94268		0.920444	0.97446	0.782917	0.928322	14.2608		11.2657	7.9124	7.46307	8.3736
A0A1P8ANH8	AT1G66880	Protein kinase superfamily protein;Protein kinase superfamily protein;LEAF RUST 10 DISEASE-RESISTANCE LOCUS RECEPTOR-LIKE PROTEIN KINASE-like 1.4	5.26267e-25	0.91619	102109	SPDVVDIECGGGDDVGLLR	TRUE	_S[Phospho]PDVVDIEC[Carbamidomethyl]GGGDDVGLLR_.2	_S[Phospho]PDVVDIEC[Carbamidomethyl]GGGDDVGLLR_	_S[+80]PDVVDIEC[+57]GGGDDVGLLR_	FALSE	1.59349e+06	1.19347e+06	1.19706e+06	720033	496097	422136	0.411209	0.00814297	2.39029e-27	6.2116e-22	4.16949e-47	2.7392e-14	2.6635e-13	1.14137e-25	91.6869	92.044	91.9235	91.8096	91.9743	92.4057	1	1	1	1	1	1
A0A1P8ANH8	AT1G66880	Protein kinase superfamily protein;Protein kinase superfamily protein;LEAF RUST 10 DISEASE-RESISTANCE LOCUS RECEPTOR-LIKE PROTEIN KINASE-like 1.4	5.26267e-25	0.91619	102109	SLPITSYSSR	TRUE	_SLPITSYS[Phospho]SR_.2	_SLPITSYS[Phospho]SR_	_SLPITSYS[+80]SR_	FALSE	862105	724073	632145	431089	436776	390069	0.567066	0.00945915	1.66266e-24	6.41049e-22	1.14145e-23	2.07326e-17	5.21352e-13	3.20572e-12	58.6131	58.6582	58.672	58.4938	58.6841	58.8477	0.923743	0.986117	0.985364	0.949301	0.917567	0.925895	22.1195	22.8133	21.1345	16.9373	20.2407	15.2759
A0A1P8ANP2	AT1G75150	DNA ligase-like protein	0.000528948	0.79408	88543	LNLSPVPDK	TRUE	_LNLS[Phospho]PVPDK_.2	_LNLS[Phospho]PVPDK_	_LNLS[+80]PVPDK_	FALSE	79773.7	99464.8	260276	253854	99744.4	248137	1.36909	0.517331	0.000204951	0.000480076	0.000508234	0.000275851	0.000954968	0.00124654	58.4061	58.5124	58.4956	58.2717	58.4619	58.6713	1	1	1	1	1	1
A0A1P8ANR5	AT1G08680	ARF GAP-like zinc finger-containing protein ZIGA4;ARF GAP-like zinc finger-containing protein ZIGA4;Probable ADP-ribosylation factor GTPase-activating protein AGD14	2.00435e-26	0.919418	64506.8	ASDYSVSSAGDPFR	TRUE	_AS[Phospho]DYSVSSAGDPFR_.2	_AS[Phospho]DYSVSSAGDPFR_	_AS[+80]DYSVSSAGDPFR_	FALSE	4.17418e+06	4998383	4.44852e+06	4.97814e+06	4.63888e+06	4.35653e+06	1.02588	0.716777	1.23644e-43	3.56057e-28	1.15449e-41	3.18671e-29	4.5915e-22	2.02741e-18	70.5487	70.8003	70.8264	70.501	70.7276	70.9373	1	0.999975	0.999994	1	0.999999	0.999994	22.0171	13.0012	15.7113	22.8018	16.7714	19.5594
A0A1P8ANR5	AT1G08680	ARF GAP-like zinc finger-containing protein ZIGA4;ARF GAP-like zinc finger-containing protein ZIGA4;Probable ADP-ribosylation factor GTPase-activating protein AGD14	2.00435e-26	0.919418	64506.8	ASSFVYSPGR	TRUE	_ASS[Phospho]FVYS[Phospho]PGR_.2	_ASS[Phospho]FVYS[Phospho]PGR_	_ASS[+80]FVYS[+80]PGR_	FALSE	6908440	6.11408e+06	6095714	5359128	5.46842e+06	6.07735e+06	0.884229	0.101922	1.11942e-32	1.66933e-20	1.84881e-33	6.30459e-20	8.51932e-15	5.68216e-18	56.4338	56.3395	56.5048	56.3756	56.2264	56.375	0.999864	0.999842	0.99657	0.999952	0.922169	0.995394	39.8445	39.813	33.7545	32.2643	33.0143	28.4235
A0A1P8ANR5	AT1G08680	ARF GAP-like zinc finger-containing protein ZIGA4;ARF GAP-like zinc finger-containing protein ZIGA4;Probable ADP-ribosylation factor GTPase-activating protein AGD14	2.00435e-26	0.919418	64506.8	ASSFVYSPGR	TRUE	_ASS[Phospho]FVYSPGR_.2	_ASS[Phospho]FVYSPGR_	_ASS[+80]FVYSPGR_	FALSE	9595091	8719482	9452159	9450402	8666370	9297574	0.987309	0.761913	2.82777e-42	7.05766e-30	3.37921e-35	1.42146e-23	3.42265e-16	9.11643e-19	54.8503	55.033	55.0454	55.0398	55.1694	55.0677	0.999999	0.962399	0.998463	0.997676	1	0.982631	50.3286	37.202	40.0576	41.0175	52.011	42.9179
A0A1P8ANR5	AT1G08680	ARF GAP-like zinc finger-containing protein ZIGA4;ARF GAP-like zinc finger-containing protein ZIGA4;Probable ADP-ribosylation factor GTPase-activating protein AGD14	2.00435e-26	0.919418	64506.8	ASSFVYSPGR	TRUE	_ASSFVYS[Phospho]PGR_.2	_ASSFVYS[Phospho]PGR_	_ASSFVYS[+80]PGR_	FALSE	7160302	7456863	6.98823e+06	6530851	6.60493e+06	7.33697e+06	0.947576	0.2648	8.5659e-37	9.13176e-28	1.28894e-33	2.61935e-21	4.47293e-15	1.22694e-18	56.3827	56.6116	56.5768	56.4476	56.5603	56.6009	1	1	1	1	1	1	41.8265	28.179	37.8879	38.6543	33.1154	29.226
A0A1P8ANR5	AT1G08680	ARF GAP-like zinc finger-containing protein ZIGA4;ARF GAP-like zinc finger-containing protein ZIGA4;Probable ADP-ribosylation factor GTPase-activating protein AGD14	2.00435e-26	0.919418	64506.8	SVDSNFMSIK	TRUE	_S[Phospho]VDS[Phospho]NFMSIK_.2	_S[Phospho]VDS[Phospho]NFMSIK_	_S[+80]VDS[+80]NFMSIK_	FALSE	139497	181490	118359	173568	209345	118682	1.14168	0.554865	0.000187655	0.000799386	0.00117196	0.000268254	0.00266242	0.000378962	84.8389	84.7151	84.6038	84.9027	84.7393	84.9594	0.995796	0.922983	0.994192	0.950307	0.999413	0.996242	7.98198	3.39646	6.13684	3.89721	8.43859	6.57639
A0A1P8ANR5	AT1G08680	ARF GAP-like zinc finger-containing protein ZIGA4;ARF GAP-like zinc finger-containing protein ZIGA4;Probable ADP-ribosylation factor GTPase-activating protein AGD14	2.00435e-26	0.919418	64506.8	SVDSNFMSIK	TRUE	_S[Phospho]VDSNFM[Oxidation]SIK_.2	_S[Phospho]VDSNFM[Oxidation]SIK_	_S[+80]VDSNFM[+16]SIK_	FALSE	361833	455848	268723	421817	448184	474017	1.23713	0.200475	0.000214463	0.00131222	0.00650811	0.00165477	0.00297549	0.00281504	57.5559	57.6312	57.4587	57.5446	57.519	57.6202	0.999985	0.999884	0.97433	0.997296	0.999987	0.999826	15.4506	13.0464	9.95451	11.7714	14.2376	13.6147
A0A1P8ANR5	AT1G08680	ARF GAP-like zinc finger-containing protein ZIGA4;ARF GAP-like zinc finger-containing protein ZIGA4;Probable ADP-ribosylation factor GTPase-activating protein AGD14	2.00435e-26	0.919418	64506.8	SDIQSPNFQQEAEFR	TRUE	_SDIQS[Phospho]PNFQQEAEFR_.2	_SDIQS[Phospho]PNFQQEAEFR_	_SDIQS[+80]PNFQQEAEFR_	FALSE	6.65172e+06	5.96752e+06	5.78377e+06	5919782	6.21345e+06	6760416	1.02666	0.674101	3.46951e-29	3.78555e-24	1.15566e-12	5.73107e-21	2.5403e-16	5.17116e-15	74.0117	74.5394	74.6341	74.1473	74.3477	74.6948	0.820028	0.996451	0.999999	0.999973	0.999936	0.999017	15.009	13.8714	15.2664	20.1315	19.4686	16.3067
A0A1P8ANR5	AT1G08680	ARF GAP-like zinc finger-containing protein ZIGA4;ARF GAP-like zinc finger-containing protein ZIGA4;Probable ADP-ribosylation factor GTPase-activating protein AGD14	2.00435e-26	0.919418	64506.8	TTSSGSVR	TRUE	_TTS[Phospho]SGSVR_.2	_TTS[Phospho]SGSVR_	_TTS[+80]SGSVR_	FALSE	2.71702e+06	3.01809e+06	3.75762e+06	2.76509e+06	3.01509e+06	3021835	0.927237	0.512237	4.69932e-18	3.52949e-05	7.11294e-16	2.32751e-16	8.88666e-10	7.85267e-15	13.6378	13.8896	13.7037	13.8729	13.869	13.8438	0.993096	0.975226	0.998376	0.965847	0.999307	0.999582	17.3227	15.9654	20.3246	22.2122	23.0229	23.3223
A0A1P8ANX7	AT1G74160	LONGIFOLIA protein	3.94883e-06	0.858693	99817.9	STEADGGKSPSVIEAAK	TRUE	_STEADGGKS[Phospho]PSVIEAAK_.2	_STEADGGKS[Phospho]PSVIEAAK_	_STEADGGKS[+80]PSVIEAAK_	FALSE		43252.2	51491.7	78114.2	122692		2.11946	0.144195		0.00131339	0.00161357	0.000107849	0.000770005			44.4971	44.3441	44.7727	44.6071			0.874013	0.878758	0.901558	0.916929			5.43686	5.3636	9.72364	8.78329
A0A1P8ANY9	AT1G06890	Nodulin MtN21 /EamA-like transporter family protein;Nodulin MtN21 /EamA-like transporter family protein;UDP-xylose transporter 3	0.000359567	0.803489	38419.3	ESEKDPLIAAENGSGVLSDGGGGVQQK	TRUE	_ESEKDPLIAAENGSGVLS[Phospho]DGGGGVQQK_.3	_ESEKDPLIAAENGSGVLS[Phospho]DGGGGVQQK_	_ESEKDPLIAAENGSGVLS[+80]DGGGGVQQK_	FALSE	1244177	1.25145e+06	675667	369963		303952	0.318758	0.0619861	2.71773e-09	0.00160333	0.000521697	0.000228172		0.000274006	72.7759	77.2006	73.8122	76.1606		78.1873	0.990534	0.812711	0.993145	0.997335		0.873744	11.7565	3.88598	9.5214	9.93015		6.88804
A0A1P8AP47	AT1G70180	Sterile alpha motif (SAM) domain-containing protein;Sterile alpha motif (SAM) domain-containing protein;Sterile alpha motif (SAM) domain-containing protein;Sterile alpha motif (SAM) domain-containing protein;At1g70180	2.57762e-22	0.909884	48640.7	AASDIDDGYELPR	TRUE	_AAS[Phospho]DIDDGYELPR_.2	_AAS[Phospho]DIDDGYELPR_	_AAS[+80]DIDDGYELPR_	FALSE	932511	324122	208703	391756	408229	708108	1.02918	0.956743	2.37581e-29	4.7632e-13	7.22657e-09	1.28021e-20	1.19681e-12	2.13479e-15	69.7376	70.1199	70.2548	69.5691	70.0477	70.3035	1	1	0.999971	1	1	1	19.6914	19.2431	11.4332	18.3287	17.5012	20.6578
A0A1P8AP47	AT1G70180	Sterile alpha motif (SAM) domain-containing protein;Sterile alpha motif (SAM) domain-containing protein;Sterile alpha motif (SAM) domain-containing protein;Sterile alpha motif (SAM) domain-containing protein;At1g70180	2.57762e-22	0.909884	48640.7	AQSDEGCTMDLR	TRUE	_AQS[Phospho]DEGC[Carbamidomethyl]TM[Oxidation]DLR_.2	_AQS[Phospho]DEGC[Carbamidomethyl]TM[Oxidation]DLR_	_AQS[+80]DEGC[+57]TM[+16]DLR_	FALSE	332001	305896	362854	380026	456436	241812	1.07746	0.710964	0.000208607	0.000213916	0.000264525	1.52382e-17	1.78579e-06	0.000659176	36.292	36.4519	36.0895	36.61	36.5043	36.4296	0.999999	1	1	1	1	1	20.8114	32.3367	22.7433	29.4331	33.2097	26.9096
A0A1P8AP47	AT1G70180	Sterile alpha motif (SAM) domain-containing protein;Sterile alpha motif (SAM) domain-containing protein;Sterile alpha motif (SAM) domain-containing protein;Sterile alpha motif (SAM) domain-containing protein;At1g70180	2.57762e-22	0.909884	48640.7	AQSDEGCTMDLR	TRUE	_AQS[Phospho]DEGC[Carbamidomethyl]TMDLR_.2	_AQS[Phospho]DEGC[Carbamidomethyl]TMDLR_	_AQS[+80]DEGC[+57]TMDLR_	FALSE	430254	533687	489769	521001	587378	598483	1.17414	0.0935948	1.39352e-12	8.23735e-05	1.2316e-06	8.75393e-10	8.19987e-05	4.76327e-06	49.4432	49.6231	49.4614	49.6181	49.5157	49.5367	0.999999	0.999997	1	1	0.999995	0.999993	15.492	13.6656	16.8008	18.0586	13.2384	12.9029
A0A1P8AP47	AT1G70180	Sterile alpha motif (SAM) domain-containing protein;Sterile alpha motif (SAM) domain-containing protein;Sterile alpha motif (SAM) domain-containing protein;Sterile alpha motif (SAM) domain-containing protein;At1g70180	2.57762e-22	0.909884	48640.7	GEASFSGNDLQISR	TRUE	_GEAS[Phospho]FSGNDLQISR_.2	_GEAS[Phospho]FSGNDLQISR_	_GEAS[+80]FSGNDLQISR_	FALSE	83350.6		76981.2	117835		102471	1.37407	0.0690375	0.00098182		0.00362824	0.00382564		0.00124269	67.7556		68.2806	67.8335		68.2391	0.955951		0.820769	0.996881		0.99382	7.78249		4.86786	11.1278		11.0802
A0A1P8AP88	AT1G18160	Protein kinase superfamily protein	3.53301e-23	0.911948	103709	KSPSSSNATNSK	TRUE	_KS[Phospho]PSSSNATNSK_.2	_KS[Phospho]PSSSNATNSK_	_KS[+80]PSSSNATNSK_	FALSE	119023		188801		147726	128845	0.898472	0.707646	0.0015471		0.00235693		0.00364203	0.00045388	11.7663		11.618		12.0349	11.7488	0.989918		0.98052		0.998473	0.999892	7.19633		7.39049		9.09203	14.4882
A0A1P8AP88	AT1G18160	Protein kinase superfamily protein	3.53301e-23	0.911948	103709	SNKSSDAEPSPSDSLR	TRUE	_S[Phospho]NKS[Phospho]S[Phospho]DAEPSPSDSLR_.2	_S[Phospho]NKS[Phospho]S[Phospho]DAEPSPSDSLR_	_S[+80]NKS[+80]S[+80]DAEPSPSDSLR_	FALSE	104824	186228	128877	74873	190242	126446	0.932447	0.829677	1.84e-07	4.68101e-08	0.00015359	0.000251425	1.00007e-07	2.00947e-08	46.0828	45.6456	45.9096	45.7355	45.6783	45.6979	0.99783	0.999999	0.926529	0.961423	0.990154	0.999439	21.3727	30.4373	18.2493	20.4079	11.3654	27.8682
A0A1P8APD7	AT1G73350	Ankyrin repeat protein;Ankyrin repeat protein;Ankyrin repeat protein;Ankyrin repeat protein;AT1G73350 protein;Ankyrin repeat protein	4.15859e-25	0.916432	23829.4	ISTPSSPSLSPPVR	TRUE	_ISTPSS[Phospho]PSLSPPVR_.2	_ISTPSS[Phospho]PSLSPPVR_	_ISTPSS[+80]PSLSPPVR_	FALSE	2.3341e+06	2424863	2.2767e+06	2779370	2797004	2528869	1.15202	0.0211013	2.82733e-32	2.2692e-20	1.15101e-25	1.0579e-19	3.59359e-32	1.21605e-15	61.9867	62.5289	62.567	62.3589	62.3229	62.5634	0.999758	0.999942	0.999948	0.997259	0.997454	0.998015	21.7855	25.549	22.4157	24.4145	15.3626	17.1534
A0A1P8API4	AT1G73960	Transcription initiation factor TFIID subunit 2	1.02924e-40	0.9468	144110	GQTSSASVDAPQR	TRUE	_GQTS[Phospho]S[Phospho]AS[Phospho]VDAPQR_.2	_GQTS[Phospho]S[Phospho]AS[Phospho]VDAPQR_	_GQTS[+80]S[+80]AS[+80]VDAPQR_	FALSE	1.23998e+06	1.54299e+06	1.65512e+06	1.3839e+06	1.49656e+06	1.60709e+06	1.01115	0.91174	3.42436e-19	2.35816e-15	5.29847e-22	5.61528e-13	2.49618e-10	3.10072e-12	27.4021	27.1028	27.3166	27.0523	26.9801	27.1378	0.992273	0.988292	0.999294	0.999742	0.978714	0.978837	9.83585	14.3781	12.703	17.8888	14.0679	15.6138
A0A1P8API4	AT1G73960	Transcription initiation factor TFIID subunit 2	1.02924e-40	0.9468	144110	SQGIVVR	TRUE	_S[Phospho]QGIVVR_.2	_S[Phospho]QGIVVR_	_S[+80]QGIVVR_	FALSE	1.21133e+06	1.52746e+06	1.61987e+06	1.48408e+06	1.46842e+06	1537474	1.03013	0.744716	1.07627e-37	1.21371e-47	7.72508e-42	3.70032e-28	3.65371e-27	2.50248e-25	39.4765	39.376	39.1095	39.5629	39.581	39.3373	1	1	1	1	1	1
A0A1P8APP7	AT1G54920	Uncharacterized protein	0.000232661	0.830422	75147.4	APSPTVSISDLISR	TRUE	_APS[Phospho]PTVSISDLISR_.2	_APS[Phospho]PTVSISDLISR_	_APS[+80]PTVSISDLISR_	FALSE	209168		247663	274999	369804	372047	1.48392	0.0855125	0.00218401		9.69776e-09	0.00181631	7.08842e-09	2.73908e-08	96.7276		97.0412	97.0481	97.3052	97.6257	0.894331		0.987679	0.985612	0.893502	0.937002	6.46903		10.982	11.867	10.0512	12.3166
A0A1P8APR4	AT1G55310	SC35-like splicing factor 33;SC35-like splicing factor 33;SC35-like splicing factor 33;Serine/arginine-rich SC35-like splicing factor SCL33	1.4508e-21	0.90805	23631.2	SGDYYSPPPR	TRUE	_S[Phospho]GDYYS[Phospho]PPPR_.2	_S[Phospho]GDYYS[Phospho]PPPR_	_S[+80]GDYYS[+80]PPPR_	FALSE	13711727	13263546	15186309	12154239	12481939	13168832	0.89667	0.0903029	1.95428e-42	9.16005e-34	8.84265e-42	1.13365e-26	4.80921e-24	1.1512e-21	49.3095	49.2282	49.3888	49.2541	49.1668	49.2338	0.999948	0.999999	0.999998	0.99672	0.99993	1	32.6715	43.4241	41.6913	34.4362	35.0835	42.3273
A0A1P8APR4	AT1G55310	SC35-like splicing factor 33;SC35-like splicing factor 33;SC35-like splicing factor 33;Serine/arginine-rich SC35-like splicing factor SCL33	1.4508e-21	0.90805	23631.2	SGDYYSPPPR	TRUE	_S[Phospho]GDYYSPPPR_.2	_S[Phospho]GDYYSPPPR_	_S[+80]GDYYSPPPR_	FALSE	1.14884e+06	1.77106e+06	1.94514e+06	1.51809e+06	1.46951e+06	1.41567e+06	0.905081	0.561627	1.21884e-30	5.74928e-18	1.64513e-26	6.56693e-18	3.70919e-17	6.42181e-17	46.2425	46.113	46.0233	45.8644	46.3605	45.9501	0.999984	0.998108	0.999981	0.946227	0.910833	0.999367	14.0249	9.10756	12.9525	9.64129	8.58148	11.2725
A0A1P8APR4	AT1G55310	SC35-like splicing factor 33;SC35-like splicing factor 33;SC35-like splicing factor 33;Serine/arginine-rich SC35-like splicing factor SCL33	1.4508e-21	0.90805	23631.2	SQSPHGGQYDEDR	TRUE	_S[Phospho]QS[Phospho]PHGGQYDEDR_.2	_S[Phospho]QS[Phospho]PHGGQYDEDR_	_S[+80]QS[+80]PHGGQYDEDR_	FALSE	159682	202087	327818	236367	272019	257331	1.1104	0.648216	1.42375e-15	1.63826e-07	3.47008e-06	0.000107854	4.68251e-10	6.98828e-09	29.8251	29.6197	29.0951	30.2041	29.8354	29.8862	0.999438	0.999879	0.998767	0.999961	0.999803	0.999981	8.48298	10.0156	7.69567	11.1567	12.1644	11.867
A0A1P8APR4	AT1G55310	SC35-like splicing factor 33;SC35-like splicing factor 33;SC35-like splicing factor 33;Serine/arginine-rich SC35-like splicing factor SCL33	1.4508e-21	0.90805	23631.2	SYTPEPAR	TRUE	_SYT[Phospho]PEPAR_.2	_SYT[Phospho]PEPAR_	_SYT[+80]PEPAR_	FALSE	587276	764481	486247		407148	897058	1.06437	0.863419	6.84648e-10	1.26804e-11	1.04278e-18		2.51627e-08	1.37158e-06	34.9976	34.909	34.4666		35.0248	34.95	0.998539	0.999588	0.999985		0.999999	0.999912	10.9507	13.918	12.801		17.4979	15.5396
A0A1P8APU6	AT1G76660	Hydroxyproline-rich glycoprotein family protein;Uncharacterized protein At1g76660	5.98638e-14	0.888513	35676.9	LTAPSSPDVPYAR	TRUE	_LT[Phospho]APSS[Phospho]PDVPYAR_.2	_LT[Phospho]APSS[Phospho]PDVPYAR_	_LT[+80]APSS[+80]PDVPYAR_	FALSE	363797		409389	682202	689447	679923	1.76893	0.00043619	3.81655e-20		1.52719e-22	3.80113e-18	5.12204e-13	1.26897e-14	66.7846		66.863	66.7394	66.6429	66.7312	0.952797		0.973615	0.871626	0.989327	0.835366	16.4139		18.3012	18.7806	16.7433	15.7873
A0A1P8APU6	AT1G76660	Hydroxyproline-rich glycoprotein family protein;Uncharacterized protein At1g76660	5.98638e-14	0.888513	35676.9	LTAPSSPDVPYAR	TRUE	_LTAPSS[Phospho]PDVPYAR_.2	_LTAPSS[Phospho]PDVPYAR_	_LTAPSS[+80]PDVPYAR_	FALSE	1.52651e+06	1542009	1490010	2.05842e+06	1.91705e+06	1.77813e+06	1.26216	0.00842297	2.31182e-35	5.5795e-22	1.18947e-25	2.55872e-21	2.59236e-14	7.99737e-12	61.8295	62.2641	62.4248	62.0942	62.2118	62.2984	0.999877	0.995338	0.998783	0.999863	0.999987	0.999381	30.0135	33.8284	24.5017	31.381	33.2534	28.137
A0A1P8APU9	AT1G77800	PHD finger family protein	0.000171044	0.837757	156916	GHPDSNISGSEAIQR	TRUE	_GHPDS[Phospho]NIS[Phospho]GS[Phospho]EAIQR_.2	_GHPDS[Phospho]NIS[Phospho]GS[Phospho]EAIQR_	_GHPDS[+80]NIS[+80]GS[+80]EAIQR_	FALSE	124320	127085	148782	138413	99863.2		0.893118	0.474799	0.000206575	1.97499e-11	0.000424883	7.29231e-11	1.04269e-08		42.3272	42.3663	42.4346	42.3731	42.4379		1	1	1	1	1
A0A1P8APU9	AT1G77800	PHD finger family protein	0.000171044	0.837757	156916	GHPDSNISGSEAIQR	TRUE	_GHPDS[Phospho]NIS[Phospho]GSEAIQR_.2	_GHPDS[Phospho]NIS[Phospho]GSEAIQR_	_GHPDS[+80]NIS[+80]GSEAIQR_	FALSE	273885	261659	338186	290053	225549	265665	0.894173	0.366316	8.79545e-05	3.47682e-10	0.000164731	1.18223e-14	7.54374e-08	1.9222e-08	44.2278	44.1129	44.1288	44.3276	44.1153	44.1972	0.998242	0.990946	0.861509	0.99531	0.997666	0.989762	7.33988	8.23947	2.65263	6.35296	9.16504	8.04387
A0A1P8APW3	AT1G16610	Arginine/serine-rich 45;Arginine/serine-rich 45;Arginine/serine-rich 45;Serine/arginine-rich splicing factor SR45	2.5288e-25	0.916952	41977.6	GKSPAGPAR	TRUE	_GKS[Phospho]PAGPAR_.2	_GKS[Phospho]PAGPAR_	_GKS[+80]PAGPAR_	FALSE	19728840	21366304	15684558	23330342	27769896	46035124	1.71074	0.133061	3.34503e-28	3.32609e-28	1.41173e-31	9.3342e-23	2.17095e-17	6.88185e-13	18.9429	19.2328	18.7958	19.4748	19.1455	18.7248	1	1	1	1	1	1
A0A1P8APW3	AT1G16610	Arginine/serine-rich 45;Arginine/serine-rich 45;Arginine/serine-rich 45;Serine/arginine-rich splicing factor SR45	2.5288e-25	0.916952	41977.6	GRSPPPPPSK	TRUE	_GRS[Phospho]PPPPPSK_.2	_GRS[Phospho]PPPPPSK_	_GRS[+80]PPPPPSK_	FALSE	29401208	38975432	42552756	31501074	39109884	40284496	0.999694	0.99823	1.26833e-27	7.7482e-22	8.60935e-38	2.03156e-19	3.80376e-17	1.87572e-23	27.7382	27.5464	26.9139	27.8515	27.594	27.2429	1	1	1	1	1	1	101.205	102.769	52.8185	104.716	99.6162	72.3756
A0A1P8APW3	AT1G16610	Arginine/serine-rich 45;Arginine/serine-rich 45;Arginine/serine-rich 45;Serine/arginine-rich splicing factor SR45	2.5288e-25	0.916952	41977.6	GRSPSSPPPR	TRUE	_GRS[Phospho]PS[Phospho]S[Phospho]PPPR_.2	_GRS[Phospho]PS[Phospho]S[Phospho]PPPR_	_GRS[+80]PS[+80]S[+80]PPPR_	FALSE	723027		436680	239150	623154	883600	1.00365	0.994117	0.00163256		0.000181939	7.83066e-07	1.09067e-07	0.00123549	19.4065		19.2711	19.2156	19.3221	19.0338	1		1	1	1	1
A0A1P8APW3	AT1G16610	Arginine/serine-rich 45;Arginine/serine-rich 45;Arginine/serine-rich 45;Serine/arginine-rich splicing factor SR45	2.5288e-25	0.916952	41977.6	RSPDSPHR	TRUE	_RS[Phospho]PDS[Phospho]PHR_.2	_RS[Phospho]PDS[Phospho]PHR_	_RS[+80]PDS[+80]PHR_	FALSE	1.12523e+06	1.56566e+06	1.75213e+06	1.13948e+06	1.4266e+06	1.57551e+06	0.932155	0.679145	6.55741e-15	7.207e-18	1.2603e-25	2.51154e-19	2.17198e-11	1.93116e-15	13.2763	13.6763	13.4347	13.6063	13.601	13.6694	1	1	1	1	1	1
A0A1P8APW3	AT1G16610	Arginine/serine-rich 45;Arginine/serine-rich 45;Arginine/serine-rich 45;Serine/arginine-rich splicing factor SR45	2.5288e-25	0.916952	41977.6	SDNAAADAEK	TRUE	_S[Phospho]DNAAADAEK_.2	_S[Phospho]DNAAADAEK_	_S[+80]DNAAADAEK_	FALSE	274892	336869	383908	304557	343266	346332	0.998479	0.988964	0.000165079	3.06412e-13	2.22926e-11	1.08455e-10	1.1466e-09	5.41107e-11	18.843	18.8028	18.8044	18.9236	18.8574	18.7333	1	1	1	1	1	1
A0A1P8APW3	AT1G16610	Arginine/serine-rich 45;Arginine/serine-rich 45;Arginine/serine-rich 45;Serine/arginine-rich splicing factor SR45	2.5288e-25	0.916952	41977.6	SPDSPHR	TRUE	_S[Phospho]PDSPHR_.2	_S[Phospho]PDSPHR_	_S[+80]PDSPHR_	FALSE	586909	496470	613748	675275	672878		1.19156	0.0988885	3.10396e-50	7.56597e-09	0.000580549	3.50549e-14	0.000207805		13.038	13.3415	13.1571	13.2932	13.363		0.987548	0.89974	0.833025	0.989807	0.97629		5.3733	3.19434	2.60722	5.57586	4.71785
A0A1P8APW3	AT1G16610	Arginine/serine-rich 45;Arginine/serine-rich 45;Arginine/serine-rich 45;Serine/arginine-rich splicing factor SR45	2.5288e-25	0.916952	41977.6	SPPPPPSK	TRUE	_S[Phospho]PPPPPSK_.2	_S[Phospho]PPPPPSK_	_S[+80]PPPPPSK_	FALSE	11259590	13637922	17791420	12775830	14147811	16747722	1.02301	0.890643	1.89392e-43	2.08876e-30	4.18158e-38	2.70193e-25	3.47134e-20	4.21489e-21	21.7099	21.6871	21.5142	21.5345	21.6506	21.6228	1	1	1	1	1	1	55.1776	38.1337	39.8858	52.9587	54.0211	54.0432
A0A1P8APW3	AT1G16610	Arginine/serine-rich 45;Arginine/serine-rich 45;Arginine/serine-rich 45;Serine/arginine-rich splicing factor SR45	2.5288e-25	0.916952	41977.6	SPSSPPPR	TRUE	_S[Phospho]PSS[Phospho]PPPR_.2	_S[Phospho]PSS[Phospho]PPPR_	_S[+80]PSS[+80]PPPR_	FALSE	1.62776e+06	2.40429e+06	3.39334e+06	2.20073e+06	3.09339e+06	2.98392e+06	1.11483	0.651485	7.39589e-28	6.68393e-27	4.95944e-15	0.000113392	6.51684e-13	3.65109e-15	18.7855	18.6668	18.6864	18.7854	18.7031	18.5787	0.975491	0.998135	0.964487	0.999969	0.998235	0.999624	10.7989	9.14311	12.0199	14.1845	10.1586	13.8121
A0A1P8APW9	AT1G07650	Non-specific serine/threonine protein kinase;Non-specific serine/threonine protein kinase;Probable LRR receptor-like serine/threonine-protein kinase At1g07650;Non-specific serine/threonine protein kinase	5.18201e-37	0.94024	110027	SLSFSTSGPR	TRUE	_SLS[Phospho]FSTSGPR_.2	_SLS[Phospho]FSTSGPR_	_SLS[+80]FSTSGPR_	FALSE	6.07471e+06	5.5922e+06	5685534	6467742	6777988	6.57507e+06	1.14225	0.00902491	6.50441e-35	9.06907e-23	1.38882e-30	6.80378e-21	5.43087e-14	1.35782e-18	59.4685	59.7922	59.53	59.4874	59.6945	59.6736	0.999999	0.999936	0.999864	0.999999	0.999904	0.999916	30.9763	27.7012	30.0643	33.3706	30.6926	30.3731
A0A1P8APW9	AT1G07650	Non-specific serine/threonine protein kinase;Non-specific serine/threonine protein kinase;Probable LRR receptor-like serine/threonine-protein kinase At1g07650;Non-specific serine/threonine protein kinase	5.18201e-37	0.94024	110027	TASANSLVDAEEK	TRUE	_TAS[Phospho]ANSLVDAEEK_.2	_TAS[Phospho]ANSLVDAEEK_	_TAS[+80]ANSLVDAEEK_	FALSE	539448	474149	518121	607319	732732	703946	1.33445	0.0159199	6.07468e-08	4.44096e-16	1.41969e-18	2.55847e-13	6.30773e-14	5.75033e-19	52.6928	52.7511	52.5309	52.5754	52.7967	52.7418	0.983476	0.999047	0.976738	0.989988	0.976424	0.963971	11.0335	21.705	14.1004	16.7898	18.8263	8.93212
A0A1P8APZ0	AT1G12460	Leucine-rich repeat protein kinase family protein;Probable LRR receptor-like serine/threonine-protein kinase At1g12460	6.56325e-23	0.911307	81585.5	DLLETGSASDCFDR	TRUE	_DLLETGS[Phospho]ASDC[Carbamidomethyl]FDR_.2	_DLLETGS[Phospho]ASDC[Carbamidomethyl]FDR_	_DLLETGS[+80]ASDC[+57]FDR_	FALSE	2599212	2.65944e+06	2298216	2154644	2.1103e+06	2280249	0.866125	0.0515514	8.0983e-37	1.65979e-28	6.24512e-33	6.12946e-30	9.83565e-19	5.26065e-16	76.1605	76.3755	76.4091	76.0451	76.1991	76.6691	0.998684	0.998137	0.979585	0.998667	0.984197	0.998492	14.9144	14.7542	10.9062	13.6029	12.8412	11.5837
A0A1P8APZ0	AT1G12460	Leucine-rich repeat protein kinase family protein;Probable LRR receptor-like serine/threonine-protein kinase At1g12460	6.56325e-23	0.911307	81585.5	KPVESPSENQVLILR	TRUE	_KPVES[Phospho]PSENQVLILR_.2	_KPVES[Phospho]PSENQVLILR_	_KPVES[+80]PSENQVLILR_	FALSE	1.80437e+06	1.90462e+06	1.44246e+06	1.35483e+06	1.31447e+06	1.1263e+06	0.736803	0.0451037	2.15629e-08	4.80864e-16	1.81348e-23	1.04087e-24	3.53851e-08	3.06469e-11	75.226	76.6595	77.6185	75.7277	77.2394	77.8001	0.998548	0.998317	0.859055	0.994853	0.999067	0.99931	7.53336	7.3855	2.80746	6.26422	7.97582	8.27816
A0A1P8APZ6	AT1G21630	Calcium-binding EF hand family protein	8.20816e-24	0.913448	132996	EGEDVSFSDADSK	TRUE	_EGEDVSFS[Phospho]DADSK_.2	_EGEDVSFS[Phospho]DADSK_	_EGEDVSFS[+80]DADSK_	FALSE	729219	653848	669378	709075	673541	688714	1.0092	0.814882	0.000176936	9.49126e-14	5.77991e-27	6.33917e-16	2.41626e-16	1.97237e-11	52.1899	52.2327	52.0892	52.0571	52.2632	52.2697	0.874128	0.93485	0.875867	0.972447	0.753187	0.87697	7.80561	9.56158	8.41469	10.0978	8.53754	6.33602
A0A1P8APZ6	AT1G21630	Calcium-binding EF hand family protein	8.20816e-24	0.913448	132996	FDSFNSNNNDAFSLSR	TRUE	_FDS[Phospho]FNSNNNDAFSLSR_.2	_FDS[Phospho]FNSNNNDAFSLSR_	_FDS[+80]FNSNNNDAFSLSR_	FALSE	6952581	7309820	5915327	6.2954e+06	8056602	6.49751e+06	1.03329	0.763791	8.42579e-26	7.13096e-08	2.17871e-23	1.07005e-18	5.70892e-17	2.75413e-06	82.3492	82.7313	82.4925	82.3845	82.6653	82.9781	0.999998	1	0.99998	0.999999	0.999554	0.999267	27.3071	28.7808	25.5084	27.1117	22.8669	21.2212
A0A1P8APZ6	AT1G21630	Calcium-binding EF hand family protein	8.20816e-24	0.913448	132996	FDSFNYQR	TRUE	_FDS[Phospho]FNYQR_.2	_FDS[Phospho]FNYQR_	_FDS[+80]FNYQR_	FALSE	3.52012e+06	3.04133e+06	3.37672e+06	2.83949e+06	2.84564e+06	2.76228e+06	0.849996	0.0262518	5.22321e-26	7.54485e-24	1.97452e-24	2.68883e-18	5.12734e-12	9.00688e-14	59.3788	59.6406	59.44	59.3054	59.6046	59.6452	1	1	1	1	1	1	41.7485	36.3725	31.037	41.6173	40.3742	34.7016
A0A1P8APZ6	AT1G21630	Calcium-binding EF hand family protein	8.20816e-24	0.913448	132996	FDSIGSTR	TRUE	_FDS[Phospho]IGSTR_.2	_FDS[Phospho]IGSTR_	_FDS[+80]IGSTR_	FALSE	20186680	20366542	22815198	21528356	21125174	21932326	1.01921	0.668383	3.24752e-52	7.57139e-36	3.34203e-45	1.63664e-31	3.08556e-23	2.083e-23	42.5862	42.7636	42.5322	42.8867	42.8126	42.7711	1	1	1	1	1	1	56.9734	47.5351	55.5707	47.4402	46.0791	51.7597
A0A1P8APZ6	AT1G21630	Calcium-binding EF hand family protein	8.20816e-24	0.913448	132996	FDSIGSTR	TRUE	_FDSIGS[Phospho]TR_.2	_FDSIGS[Phospho]TR_	_FDSIGS[+80]TR_	FALSE	371883	388142	434011	456351	477176	457528	1.165	0.0294176	4.54708e-12	2.72303e-09	2.52639e-20	1.02368e-15	6.32481e-06	1.44183e-06	44.7988	44.6839	44.5313	44.8979	44.886	44.7064	0.987997	0.944043	0.878594	0.961451	0.989401	0.954392	17.8579	14.5998	9.43153	13.5128	20.5439	15.6844
A0A1P8APZ6	AT1G21630	Calcium-binding EF hand family protein	8.20816e-24	0.913448	132996	KGIEADSSPR	TRUE	_KGIEADSS[Phospho]PR_.2	_KGIEADSS[Phospho]PR_	_KGIEADSS[+80]PR_	FALSE	4.04874e+06	4974716	5204521	4324862	4303684		0.909674	0.416903	3.51971e-19	4.90485e-15	2.76161e-22	3.06694e-14	5.93158e-11		32.5441	32.1109	31.4547	33.2174	32.4921		0.999954	0.999999	1	0.999967	1		28.3705	30.2755	42.326	33.295	34.0072
A0A1P8APZ6	AT1G21630	Calcium-binding EF hand family protein	8.20816e-24	0.913448	132996	SENGHDDGESTASAGK	TRUE	_S[Phospho]ENGHDDGESTASAGK_.2	_S[Phospho]ENGHDDGESTASAGK_	_S[+80]ENGHDDGESTASAGK_	FALSE	175296	128602	227014	117251	155486	110695	0.722215	0.195527	3.36046e-06	9.19603e-05	1.66675e-06	0.000112179	0.000217929	0.000596127	22.0427	21.9263	21.4734	22.1481	22.03	21.7849	0.999924	1	0.998748	1	1	0.999999	18.0504	22.9001	18.5066	21.8526	26.2207	19.6572
A0A1P8APZ6	AT1G21630	Calcium-binding EF hand family protein	8.20816e-24	0.913448	132996	TTTTTAETPR	TRUE	_TTTTTAET[Phospho]PR_.2	_TTTTTAET[Phospho]PR_	_TTTTTAET[+80]PR_	FALSE	323370	119914	661109	126974		366612	0.670395	0.623398	0.000204534	0.00317066	1.82268e-06	0.00123624		0.000324804	22.5151	22.4147	22.2135	22.3898		22.3062	0.998141	0.936484	0.999993	0.992865		0.999928	10.6	7.9856	15.3988	7.54509		12.1531
A0A1P8AQ16	AT1G27460	No pollen germination related 1;No pollen germination related 1;Protein NPGR1	1.321e-15	0.892904	76429.9	FEDQPGSPESLATR	TRUE	_FEDQPGS[Phospho]PES[Phospho]LATR_.2	_FEDQPGS[Phospho]PES[Phospho]LATR_	_FEDQPGS[+80]PES[+80]LATR_	FALSE	2160894	2.38788e+06	2128134	2.58206e+06	3416678	3011814	1.34951	0.0377586	5.56814e-05	5.64064e-05	8.72703e-07	2.86696e-13	7.52607e-08	2.07585e-07	62.8956	62.8534	63.1232	62.8676	62.7705	63.0112	0.999991	0.999303	0.999626	0.999742	0.99995	0.999995	14.9425	9.30682	8.8915	11.1279	17.2526	16.0769
A0A1P8AQ16	AT1G27460	No pollen germination related 1;No pollen germination related 1;Protein NPGR1	1.321e-15	0.892904	76429.9	FEDQPGSPESLATR	TRUE	_FEDQPGS[Phospho]PESLATR_.2	_FEDQPGS[Phospho]PESLATR_	_FEDQPGS[+80]PESLATR_	FALSE	1767083	1.86252e+06	1.94402e+06	2.33979e+06	2.2699e+06	2.34624e+06	1.24801	0.00124476	3.28995e-27	2.42321e-25	5.21667e-36	1.41856e-17	7.6464e-16	6.86385e-15	59.6743	59.7828	59.6591	59.5396	59.8238	59.8641	0.999999	0.999988	0.999927	0.999993	1	0.999978	25.0993	21.3322	23.5834	30.1943	34.0963	31.2015
A0A1P8AQ29	AT1G79950	RAD3-like DNA-binding helicase protein;Regulator of telomere elongation helicase 1 homolog	5.02708e-23	0.911581	114720	LVELSDDEETPVER	TRUE	_LVELS[Phospho]DDEETPVER_.2	_LVELS[Phospho]DDEETPVER_	_LVELS[+80]DDEETPVER_	FALSE	1.52489e+06	1.32363e+06	1430940	1562603	1.4838e+06	1.52133e+06	1.06736	0.198627	3.4836e-25	1.81458e-15	1.77124e-35	1.65561e-29	1.19681e-25	4.53434e-16	64.9566	65.0838	65.2021	64.7886	65.1386	65.3501	1	1	1	1	1	1	24.2971	26.0267	15.914	27.8577	22.9007	24.4216
A0A1P8AQ69	AT1G70290	Trehalose-6-phosphatase synthase S8;Probable alpha,alpha-trehalose-phosphate synthase [UDP-forming] 8	3.77271e-24	0.914233	93189.1	AVVDSSPR	TRUE	_AVVDSS[Phospho]PR_.2	_AVVDSS[Phospho]PR_	_AVVDSS[+80]PR_	FALSE	81256	92267.2	92847.9	125179	98814.8	6.23497e+06	24.248	0.369051	0.000183716	6.13554e-07	0.000180427	0.000422443	6.61969e-05	0.0018547	27.1167	27.0574	26.7166	27.0623	27.0086	21.6613	0.982368	0.992269	0.981222	0.981732	0.980489	0.890429	5.02028	5.8548	4.95613	4.98415	4.91707	3.09514
A0A1P8AQ69	AT1G70290	Trehalose-6-phosphatase synthase S8;Probable alpha,alpha-trehalose-phosphate synthase [UDP-forming] 8	3.77271e-24	0.914233	93189.1	VLSLSPSFR	TRUE	_VLSLSPS[Phospho]FR_.2	_VLSLSPS[Phospho]FR_	_VLSLSPS[+80]FR_	FALSE	28515024	29867134	26307894	22173974	20903114	18777040	0.730359	0.00606167	3.55268e-55	3.92219e-40	1.78928e-38	2.99847e-28	2.47479e-21	1.03013e-21	77.7617	78.2234	78.1507	77.8617	78.2181	78.3316	1	1	1	1	1	1	46.0985	42.8997	37.6793	43.3937	34.687	35.4451
A0A1P8AQ83	AT1G31150	K-box region protein (DUF1985);F28K20.8 protein	2.77212e-06	0.859706	70855.8	SPAGGASNLR	TRUE	_S[Phospho]PAGGASNLR_.2	_S[Phospho]PAGGASNLR_	_S[+80]PAGGASNLR_	FALSE	103601	122549	124414	130915	167104	150639	1.27982	0.0577033	0.000206534	4.48628e-10	3.06361e-08	0.000123598	0.00438279	0.000397926	31.5343	31.3302	31.3076	31.8545	31.4374	31.5654	0.999976	1	0.999981	0.99999	0.996808	0.999969	11.6572	16.0387	11.8608	12.5037	6.74386	11.3795
A0A1P8AQ94	AT1G18670	Protein kinase superfamily protein;Protein IMPAIRED IN BABA-INDUCED STERILITY 1	1.49434e-09	0.874958	80995.9	DNVCSGSGR	TRUE	_DNVC[Carbamidomethyl]SGS[Phospho]GR_.2	_DNVC[Carbamidomethyl]SGS[Phospho]GR_	_DNVC[+57]SGS[+80]GR_	FALSE	189242	188137	255517	193473	235566	264376	1.09562	0.542411	2.74239e-11	1.70696e-10	4.19135e-09	6.7472e-10	3.76676e-08	0.000331983	15.6355	15.7078	15.5379	15.5675	15.4859	15.6523	0.996158	0.9943	0.998322	0.99377	0.999808	0.995744	12.6622	16.6059	16.9287	15.9659	14.3925	16.3147
A0A1P8AQ94	AT1G18670	Protein kinase superfamily protein;Protein IMPAIRED IN BABA-INDUCED STERILITY 1	1.49434e-09	0.874958	80995.9	IEFSGPLLSK	TRUE	_IEFS[Phospho]GPLLSK_.2	_IEFS[Phospho]GPLLSK_	_IEFS[+80]GPLLSK_	FALSE	573746	478044	324311	544717	627537	545724	1.24844	0.216178	3.80209e-10	0.000236735	0.000372104	2.25493e-08	0.00130638	0.00212172	84.655	85.2737	85.2248	84.889	85.2988	85.4249	0.998501	0.999924	0.992507	0.999992	0.999924	0.999685	10.2442	10.4891	5.88623	14.8194	10.4856	9.06105
A0A1P8AQD0	AT1G47330	Methyltransferase, putative (DUF21);DUF21 domain-containing protein At1g47330	2.33053e-14	0.889622	49388.5	DLDEQEQSPETSENGIER	TRUE	_DLDEQEQS[Phospho]PETSENGIER_.2	_DLDEQEQS[Phospho]PETSENGIER_	_DLDEQEQS[+80]PETSENGIER_	FALSE	746060	611058	575402	744122	715044	640790	1.08664	0.407732	0.000231153	4.38214e-16	1.12666e-20	1.09243e-23	8.84657e-09	1.24241e-10	50.8328	50.8599	51.0074	50.7004	50.7983	50.9123	0.999964	0.998472	0.99996	0.999994	0.999975	0.999885	11.912	12.3112	12.5964	13.7567	13.3639	11.9482
A0A1P8AQD0	AT1G47330	Methyltransferase, putative (DUF21);DUF21 domain-containing protein At1g47330	2.33053e-14	0.889622	49388.5	KPSVSSPTR	TRUE	_KPSVSS[Phospho]PTR_.2	_KPSVSS[Phospho]PTR_	_KPSVSS[+80]PTR_	FALSE		3.1491e+06	3.13643e+06	2561875	2968125	2.99473e+06	0.904164	0.194476		1.27727e-15	5.22694e-07	1.74376e-08	4.16636e-06	2.25905e-06		28.0656	27.1707	28.6972	28.3131	27.8542		0.931172	0.916677	0.906846	0.760738	0.936563		30.2731	23.2363	20.7059	26.9288	26.6138
A0A1P8AQH0	AT1G80950	Phospholipid/glycerol acyltransferase family protein;Lysophospholipid acyltransferase LPEAT1	1.5448e-10	0.878382	43678.2	SESDLAAAIEELDK	TRUE	_SES[Phospho]DLAAAIEELDK_.2	_SES[Phospho]DLAAAIEELDK_	_SES[+80]DLAAAIEELDK_	FALSE	2.31455e+06	2.23131e+06	2.8878e+06	1.74422e+06	1.93272e+06		0.741952	0.10301	1.90184e-36	1.07904e-25	3.1004e-36	0.000107848	0.00275787		107.694	108.228	108.14	107.871	108.23		0.994262	0.996563	0.994495	0.99998	0.995326		15.6875	20.3476	11.9355	11.8343	14.6628
A0A1P8AQI3	AT1G76970	Target of Myb protein 1;Target of Myb protein 1;TOM1-like protein 4	8.26201e-11	0.87928	39623.4	APPPVQIVDINHDDEDDESDDEFAR	TRUE	_APPPVQIVDINHDDEDDES[Phospho]DDEFAR_.3	_APPPVQIVDINHDDEDDES[Phospho]DDEFAR_	_APPPVQIVDINHDDEDDES[+80]DDEFAR_	FALSE	43316148	40572756	33415538	30600736	28518550	30000580	0.759731	0.0356767	2.32473e-27	1.1784e-20	2.93535e-23	2.28234e-16	1.97322e-14	3.53704e-12	82.5343	83.3954	83.5762	82.6466	83.3909	84.09	1	1	1	1	1	1
A0A1P8AQI9	AT1G24300	GYF domain-containing protein	1.16947e-35	0.9378	150123	AFSDEQINR	TRUE	_AFS[Phospho]DEQINR_.2	_AFS[Phospho]DEQINR_	_AFS[+80]DEQINR_	FALSE	550315	595226	633660	575843	740908	732745	1.15192	0.200618	1.62167e-16	8.57054e-17	4.73719e-15	4.85573e-15	4.10198e-10	6.14783e-12	49.2192	49.3374	49.1905	49.3479	49.2759	49.3124	1	1	1	1	1	1
A0A1P8AQI9	AT1G24300	GYF domain-containing protein	1.16947e-35	0.9378	150123	MMSFEAQDR	TRUE	_MMS[Phospho]FEAQDR_.2	_MMS[Phospho]FEAQDR_	_MMS[+80]FEAQDR_	FALSE	46320.7	37614.4	61013.4	22656.2	75926	82682	1.25054	0.580811	0.00202054	0.00631713	0.00522061	0.000131996	0.000776602	0.000325578	62.1145	62.3494	62.418	62.3178	62.42	62.4455	1	1	1	1	1	1
A0A1P8AQI9	AT1G24300	GYF domain-containing protein	1.16947e-35	0.9378	150123	NNSLLSGIIDGGR	TRUE	_NNS[Phospho]LLSGIIDGGR_.2	_NNS[Phospho]LLSGIIDGGR_	_NNS[+80]LLSGIIDGGR_	FALSE	5.61289e+06	5559535	5117679	6.15492e+06	6070071	5995775	1.11852	0.0170257	1.55302e-42	1.7559e-29	9.2537e-25	5.97705e-32	2.96404e-27	3.25703e-20	97.384	98.1584	98.102	97.6731	98.1608	98.3579	1	1	1	1	1	1	26.7255	27.1776	25.9843	29.4078	18.5481	18.4896
A0A1P8AQJ5	AT1G56090	Tetratricopeptide repeat (TPR)-like superfamily protein;At1g56090	1.20324e-10	0.878746	39445.4	FESVVSLR	TRUE	_FESVVS[Phospho]LR_.2	_FESVVS[Phospho]LR_	_FESVVS[+80]LR_	FALSE	312455	318836	344192	240654	280565	287163	0.828701	0.0332403	1.64859e-08	1.79744e-27	1.23482e-18	0.000107826	8.09984e-05	0.000153443	72.4213	73.1962	73.4574	72.6502	73.1893	73.3805	0.999983	0.999642	0.996547	0.999813	0.999811	0.994548	12.3016	8.93474	7.56232	9.58448	10.1481	6.20635
A0A1P8AQK5	AT1G77590	Long chain acyl-CoA synthetase 9;Long chain acyl-CoA synthetase 9, chloroplastic	4.95182e-05	0.848803	59722	EFSEDLTK	TRUE	_EFS[Phospho]EDLTK_.2	_EFS[Phospho]EDLTK_	_EFS[+80]EDLTK_	FALSE	421323	437055	424116	353763	421984	332701	0.864291	0.101449	1.3167e-09	2.31513e-06	1.07276e-14	0.000111494	9.46647e-07	7.62901e-07	56.4997	56.7132	56.6014	56.5491	56.6775	56.6255	0.999811	0.999075	0.9991	0.999968	0.998563	0.99942	9.57154	7.98479	8.01179	11.354	7.54396	8.45185
A0A1P8AQR3	AT1G13920	Remorin family protein;Remorin family protein;Remorin family protein;Remorin family protein;F7A19.1 protein	1.42984e-05	0.854416	32533	SVSFKEDK	TRUE	_SVS[Phospho]FKEDK_.2	_SVS[Phospho]FKEDK_	_SVS[+80]FKEDK_	FALSE	913136	1.04649e+06	1.05336e+06	1.01808e+06	1.0741e+06	932048	1.00373	0.954409	3.98355e-14	2.67913e-08	5.54075e-17	4.8998e-17	4.77002e-13	0.000238734	38.917	38.6165	38.1032	39.3569	39.1134	38.6699	0.999951	1	1	1	1	0.999968	10.9285	16.9297	16.8148	21.3388	25.3862	11.3424
A0A1P8AQY0	AT1G77310	Wound-responsive family protein;Ubinuclein-2	0.000453255	0.797427	62034.7	DQSASPGPSSK	TRUE	_DQSAS[Phospho]PGPSSK_.2	_DQSAS[Phospho]PGPSSK_	_DQSAS[+80]PGPSSK_	FALSE	52872.8	58233.4	73348.7	85823.1		82326.3	1.3674	0.0669392	9.02451e-05	0.000708263	7.72427e-05	0.0002711		9.64338e-07	14.9158	15.1357	14.9622	14.8568		14.9551	0.906947	0.844964	0.881348	0.823013		0.999178	9.3134	11.3299	9.15705	12.9235		16.0946
A0A1P8AQY7	AT1G79830	Golgin Putative 5;Golgin Putative 5;Golgin candidate 5	1.41443e-26	0.919766	109756	LASMESIR	TRUE	_LAS[Phospho]MESIR_.2	_LAS[Phospho]MESIR_	_LAS[+80]MESIR_	FALSE	199075	138786	201283	167886	158468	153170	0.88942	0.395962	0.000214747	0.00136008	1.40576e-09	0.000107849	0.000838048	0.000857941	57.8331	57.9085	57.9212	57.745	57.9193	58.0364	0.999894	0.999873	0.999004	0.999794	0.999982	0.996477	10.15	9.97343	7.91036	11.2767	11.9039	9.96078
A0A1P8AQY7	AT1G79830	Golgin Putative 5;Golgin Putative 5;Golgin candidate 5	1.41443e-26	0.919766	109756	QNSAFENGSLPR	TRUE	_QNS[Phospho]AFENGSLPR_.2	_QNS[Phospho]AFENGSLPR_	_QNS[+80]AFENGSLPR_	FALSE	1.26249e+06	788862	667704	1.20546e+06	953258	882411	1.11845	0.630199	1.75447e-28	3.7926e-15	9.70657e-23	2.49935e-31	4.87801e-23	3.43328e-17	57.2812	57.3717	57.3529	57.2085	57.3212	57.3915	1	1	1	1	0.999999	1	21.9875	17.9246	19.2807	20.0638	14.5223	18.9618
A0A1P8AQY7	AT1G79830	Golgin Putative 5;Golgin Putative 5;Golgin candidate 5	1.41443e-26	0.919766	109756	RSSSDEISER	TRUE	_RSS[Phospho]SDEISER_.2	_RSS[Phospho]SDEISER_	_RSS[+80]SDEISER_	FALSE	3.31154e+06	3275227	3.48625e+06	2.64321e+06	3.14461e+06	3.16624e+06	0.888915	0.11096	1.62815e-50	3.31361e-12	4.15263e-19	0.000107849	0.00010471	5.59258e-11	33.3502	32.9517	32.0162	33.8693	33.2066	33.0254	0.961447	0.999941	0.898164	0.999894	0.997879	0.994167	26.076	46.0161	39.066	43.2878	37.6345	54.2454
A0A1P8AQY7	AT1G79830	Golgin Putative 5;Golgin Putative 5;Golgin candidate 5	1.41443e-26	0.919766	109756	SEAEESQPEDSEAK	TRUE	_SEAEES[Phospho]QPEDSEAK_.2	_SEAEES[Phospho]QPEDSEAK_	_SEAEES[+80]QPEDSEAK_	FALSE	59088.8	96700.4	1380191	99721.1	186295		0.279316	0.55802	0.000205796	7.44476e-14	0.00451099	0.000995757	2.2568e-05		27.6828	27.4296	27.3356	27.5026	27.4923		0.986884	0.885006	0.82343	0.881151	0.918647		7.20409	5.0875	4.32173	7.85902	8.67199
A0A1P8AQY7	AT1G79830	Golgin Putative 5;Golgin Putative 5;Golgin candidate 5	1.41443e-26	0.919766	109756	SSSDEISER	TRUE	_SSS[Phospho]DEISER_.2	_SSS[Phospho]DEISER_	_SSS[+80]DEISER_	FALSE	3.87281e+06	3.68977e+06	6547800	3.64635e+06	4.03828e+06	4374291	0.854614	0.510337	6.91546e-29	6.40928e-23	8.89817e-33	8.23409e-21	6.0355e-14	3.16483e-18	30.4154	30.2105	29.7824	30.7192	30.4575	30.4315	0.999867	0.990088	0.996897	0.997758	0.999958	0.95903	42.4935	38.6616	37.4132	40.4545	42.5033	32.8807
A0A1P8AR50	AT1G01320	Tetratricopeptide repeat (TPR)-like superfamily protein	7.92212e-25	0.91578	197741	EMSEEDTEETGSEEGK	TRUE	_EM[Oxidation]SEEDTEETGS[Phospho]EEGK_.2	_EM[Oxidation]SEEDTEETGS[Phospho]EEGK_	_EM[+16]SEEDTEETGS[+80]EEGK_	FALSE	539406	697336	742072	641348	745775	834451	1.12268	0.384918	4.90733e-08	2.46518e-09	5.52609e-16	3.25219e-08	1.20169e-05	3.20797e-08	26.9679	26.745	26.5125	26.8951	26.8229	26.6256	0.998725	0.999037	0.999131	0.999993	0.987635	0.999981	39.7262	34.7224	31.8068	49.1447	37.5524	47.0954
A0A1P8AR50	AT1G01320	Tetratricopeptide repeat (TPR)-like superfamily protein	7.92212e-25	0.91578	197741	EMSEEDTEETGSEEGK	TRUE	_EMSEEDTEETGS[Phospho]EEGK_.2	_EMSEEDTEETGS[Phospho]EEGK_	_EMSEEDTEETGS[+80]EEGK_	FALSE	1.63254e+06	2.37856e+06	2.95001e+06	2874465	3.4e+06	3.33445e+06	1.38037	0.100995	3.3324e-14	2.24457e-14	1.20201e-16	2.86619e-13	1.03186e-08	9.06837e-11	33.8935	33.8806	33.3599	33.9198	33.8431	33.8148	0.999866	1	0.999966	0.999999	0.999993	0.999948	26.7721	29.8011	27.0284	33.1189	35.2258	36.0677
A0A1P8AR50	AT1G01320	Tetratricopeptide repeat (TPR)-like superfamily protein	7.92212e-25	0.91578	197741	LSASAAPFNPSSPPSIIR	TRUE	_LSASAAPFNPSS[Phospho]PPSIIR_.2	_LSASAAPFNPSS[Phospho]PPSIIR_	_LSASAAPFNPSS[+80]PPSIIR_	FALSE	54279832	52357908	43375596	54768536	53103048	52495220	1.06902	0.37108	1.25491e-23	2.75744e-21	1.60376e-22	6.13825e-18	1.40326e-15	2.54552e-15	89.1005	89.4099	89.0729	89.0393	89.3421	89.7136	0.999635	0.999953	0.999871	0.999933	0.999937	0.999993	56.1985	64.8203	56.4351	53.5344	42.582	54.8289
A0A1P8AR50	AT1G01320	Tetratricopeptide repeat (TPR)-like superfamily protein	7.92212e-25	0.91578	197741	QSDTSPPPSPASK	TRUE	_QSDTS[Phospho]PPPS[Phospho]PASK_.2	_QSDTS[Phospho]PPPS[Phospho]PASK_	_QSDTS[+80]PPPS[+80]PASK_	FALSE	112818	2.47109e+06	154692	2.86604e+06	2.95899e+06	243469	2.21591	0.401219	1.44317e-15	5.08081e-13	5.55443e-13	8.55102e-11	4.80384e-14	8.68622e-12	29.4603	25.2003	29.0378	25.5046	25.2791	29.3827	0.976217	0.938895	0.986372	0.99938	0.99967	0.999927	29.7421	30.0156	26.6644	34.8255	38.4344	36.475
A0A1P8AR50	AT1G01320	Tetratricopeptide repeat (TPR)-like superfamily protein	7.92212e-25	0.91578	197741	QSDTSPPPSPASK	TRUE	_QSDTS[Phospho]PPPSPASK_.2	_QSDTS[Phospho]PPPSPASK_	_QSDTS[+80]PPPSPASK_	FALSE	25979624	29033168	32346218	24173690	28286060	28195736	0.923265	0.383375	5.30636e-31	5.58876e-26	2.97685e-26	1.26437e-27	2.16466e-26	6.10825e-19	31.7474	31.5282	31.6287	31.9903	31.5733	31.8246	1	1	1	0.999999	1	1	53.3156	56.586	65.9435	61.4729	64.7079	65.9174
A0A1P8AR50	AT1G01320	Tetratricopeptide repeat (TPR)-like superfamily protein	7.92212e-25	0.91578	197741	TAGETSEEDGLK	TRUE	_T[Phospho]AGET[Phospho]S[Phospho]EEDGLK_.2	_T[Phospho]AGET[Phospho]S[Phospho]EEDGLK_	_T[+80]AGET[+80]S[+80]EEDGLK_	FALSE	663840	677925	772928	693280	710004	671896	0.981315	0.732918	0.000309004	0.000247879	0.00293859	0.000292663	0.000843589	0.000456946	38.8578	38.4038	38.8133	38.4681	38.1938	38.5647	1	1	1	1	1	1
A0A1P8AR50	AT1G01320	Tetratricopeptide repeat (TPR)-like superfamily protein	7.92212e-25	0.91578	197741	TAGETSEEDGLK	TRUE	_TAGET[Phospho]S[Phospho]EEDGLK_.2	_TAGET[Phospho]S[Phospho]EEDGLK_	_TAGET[+80]S[+80]EEDGLK_	FALSE	9250911	9468638	10572916	10391183	10986223	11538711	1.12371	0.083494	8.89215e-12	2.43233e-14	5.30718e-12	5.19975e-15	2.51504e-08	9.20818e-10	38.6533	38.4604	38.5237	38.5862	38.4194	38.506	1	1	1	1	1	1	34.8096	30.1145	27.0008	22.7162	36.0958	27.5703
A0A1P8AR50	AT1G01320	Tetratricopeptide repeat (TPR)-like superfamily protein	7.92212e-25	0.91578	197741	TAGETSEEDGLK	TRUE	_TAGETS[Phospho]EEDGLK_.2	_TAGETS[Phospho]EEDGLK_	_TAGETS[+80]EEDGLK_	FALSE	18688258	18479320	1.26316e+06	24048250	22332934	22037942	1.78032	0.160332	3.07503e-40	1.22171e-26	2.66387e-20	3.04281e-19	2.58753e-16	1.91029e-21	36.0673	36.242	30.1737	36.385	36.2948	36.2661	0.993068	0.999975	0.995103	0.999813	0.999896	0.99998	24.8873	27.5149	8.49371	36.08	39.7933	34.3548
A0A1P8AR93	AT1G69310	WRKY DNA-binding protein 57;Probable WRKY transcription factor 57	8.02096e-12	0.882459	31472.5	DNNAPSPR	TRUE	_DNNAPS[Phospho]PR_.2	_DNNAPS[Phospho]PR_	_DNNAPS[+80]PR_	FALSE	112016	159794	159674	185159	239503	245625	1.55345	0.0331833	0.000284952	1.37501e-16	5.11933e-15	0.000107836	5.26811e-12	2.40063e-05	18.1225	17.8952	17.8392	18.0183	17.9931	17.98	1	1	1	1	1	1
A0A1P8ARB7	AT1G02080	Transcription regulator	4.68772e-09	0.873107	263892	FGSALNIETLVAAAER	TRUE	_FGS[Phospho]ALNIETLVAAAER_.2	_FGS[Phospho]ALNIETLVAAAER_	_FGS[+80]ALNIETLVAAAER_	FALSE	236778		372910		281940	461224	1.21892	0.613342	2.91128e-20		2.79625e-19		2.54162e-05	2.40167e-08	115.252		115.308		115.258	115.289	1		1		0.998799	0.95502	22.9442		22.3643		7.72321	4.05551
A0A1P8ARG8	AT1G18950	DDT domain superfamily;DDT domain superfamily;DDT domain-containing protein DDR4	1.40652e-09	0.875052	86963.7	GSSSDIVPDRSPADDVAPVTDTK	TRUE	_GS[Phospho]S[Phospho]S[Phospho]DIVPDRS[Phospho]PADDVAPVTDTK_.3	_GS[Phospho]S[Phospho]S[Phospho]DIVPDRS[Phospho]PADDVAPVTDTK_	_GS[+80]S[+80]S[+80]DIVPDRS[+80]PADDVAPVTDTK_	FALSE	388462	417594	336864	350376	340285	454512	1.00197	0.987048	0.000219573	1.5691e-17	0.000553825	0.00151573	5.59335e-05	0.000827623	75.7183	75.3027	75.6141	75.5263	75.2499	75.7507	0.99998	0.999996	0.999254	0.999998	1	0.99998	15.721	20.5847	12.1693	17.6554	21.4218	17.2656
A0A1P8ARG8	AT1G18950	DDT domain superfamily;DDT domain superfamily;DDT domain-containing protein DDR4	1.40652e-09	0.875052	86963.7	GSSSDIVPDR	TRUE	_GSS[Phospho]SDIVPDR_.2	_GSS[Phospho]SDIVPDR_	_GSS[+80]SDIVPDR_	FALSE	1.37001e+06	1.20337e+06	1.37214e+06	1.13653e+06	1.27039e+06	1.09246e+06	0.886922	0.126986	0.000203333	0.000131231	4.22847e-06	0.000147534	0.000307097	0.000301348	43.0712	43.2639	43.0175	42.4331	43.2051	43.2405	0.985403	0.92919	0.994755	0.997259	0.963999	0.885984	5.90537	6.93086	7.536	7.58984	7.72798	4.84953
A0A1P8ARG8	AT1G18950	DDT domain superfamily;DDT domain superfamily;DDT domain-containing protein DDR4	1.40652e-09	0.875052	86963.7	KLSSGSEGDEEK	TRUE	_KLS[Phospho]S[Phospho]GS[Phospho]EGDEEK_.2	_KLS[Phospho]S[Phospho]GS[Phospho]EGDEEK_	_KLS[+80]S[+80]GS[+80]EGDEEK_	FALSE	54215.6	55917	249994	143.764	56647.6	60637.5	0.326077	0.299034	0.000439995	0.00261125	4.96923e-10	0.000600039	0.00248758	0.00060758	22.729	22.6597	22.396	22.4961	22.5017	22.474	1	1	1	1	1	1
A0A1P8ARG8	AT1G18950	DDT domain superfamily;DDT domain superfamily;DDT domain-containing protein DDR4	1.40652e-09	0.875052	86963.7	KLSSGSEGDEEKGDEEYK	TRUE	_KLS[Phospho]S[Phospho]GS[Phospho]EGDEEKGDEEYK_.2	_KLS[Phospho]S[Phospho]GS[Phospho]EGDEEKGDEEYK_	_KLS[+80]S[+80]GS[+80]EGDEEKGDEEYK_	FALSE	510613	601432	755991	821275	823951	753009	1.28383	0.0787544	0.000198982	5.44678e-08	1.25345e-11	0.00010865	3.69886e-05	0.00347309	39.0214	38.7979	38.7307	39.0773	38.926	38.8204	0.877102	0.999843	0.999461	0.999305	0.997352	0.998117	2.63644	9.76156	8.52446	8.2692	6.92593	7.26912
A0A1P8ARG8	AT1G18950	DDT domain superfamily;DDT domain superfamily;DDT domain-containing protein DDR4	1.40652e-09	0.875052	86963.7	SPADDVAPVTDTK	TRUE	_S[Phospho]PADDVAPVTDTK_.2	_S[Phospho]PADDVAPVTDTK_	_S[+80]PADDVAPVTDTK_	FALSE	316476	294805	340616	372846	357226	393977	1.18085	0.027819	1.87718e-11	7.4735e-12	1.30134e-11	1.17853e-16	5.31781e-09	7.45313e-12	44.7385	44.6544	44.6708	44.761	44.7029	44.6769	1	1	0.999993	1	1	1	17.0313	17.9469	13.525	24.1846	18.2982	25.9226
A0A1P8ARR1	AT1G80810	Tudor/PWWP/MBT superfamily protein	1.22037e-27	0.922055	93511.2	ENSPATSSR	TRUE	_ENS[Phospho]PATSSR_.2	_ENS[Phospho]PATSSR_	_ENS[+80]PATSSR_	FALSE	170409	196743	245881	186112	196174	213784	0.972328	0.822035	2.5474e-07	1.36769e-15	2.37016e-12	7.5038e-09	2.77882e-07	1.68449e-11	13.365	13.5236	13.3353	13.5079	13.5025	13.4764	1	0.999992	0.999999	0.999996	1	1	16.6338	13.8718	15.6876	14.4775	21.9981	18.3
A0A1P8ARR1	AT1G80810	Tudor/PWWP/MBT superfamily protein	1.22037e-27	0.922055	93511.2	QLANESEEETPK	TRUE	_QLANES[Phospho]EEETPK_.2	_QLANES[Phospho]EEETPK_	_QLANES[+80]EEETPK_	FALSE	3.03969e+06	3470954	4.01051e+06	3.92422e+06	3.49675e+06	3.84671e+06	1.07095	0.467249	3.45262e-20	4.55427e-18	1.03873e-26	3.77036e-18	1.38579e-16	2.77965e-12	36.2601	36.4353	36.0111	36.5318	36.457	36.4591	1	1	1	1	1	1	38.6614	43.1107	38.4453	50.0898	30.8997	46.6513
A0A1P8ARR1	AT1G80810	Tudor/PWWP/MBT superfamily protein	1.22037e-27	0.922055	93511.2	VHSPVNTK	TRUE	_VHS[Phospho]PVNTK_.2	_VHS[Phospho]PVNTK_	_VHS[+80]PVNTK_	FALSE	1.17383e+06	1617037	1.56352e+06	1.44213e+06	1653874	1.74049e+06	1.11072	0.386313	1.73555e-18	4.02058e-14	6.45371e-24	3.87259e-14	2.05696e-08	1.49805e-12	23.03	22.9903	22.2951	24.0168	23.2208	22.8371	0.999987	1	1	1	1	1	15.4302	23.3268	18.9419	24.5063	21.5948	28.3987
A0A1P8ARU9	AT1G52030	Myrosinase-binding protein 2	1.14668e-09	0.875375	60601.1	GGNGGASWDDGVFDGVR	TRUE	_GGNGGAS[Phospho]WDDGVFDGVR_.2	_GGNGGAS[Phospho]WDDGVFDGVR_	_GGNGGAS[+80]WDDGVFDGVR_	FALSE	1.5532e+06	1.32364e+06	1.17862e+06	1.61335e+06	1.41386e+06	1.4031e+06	1.09243	0.386612	2.11142e-28	5.26393e-21	1.43561e-29	1.77599e-21	9.39352e-14	9.08261e-15	85.5223	86.0482	85.9534	85.6636	85.9653	86.1993	1	1	1	1	1	1
A0A1P8ARU9	AT1G52030	Myrosinase-binding protein 2	1.14668e-09	0.875375	60601.1	GSQAILGDR	TRUE	_GS[Phospho]QAILGDR_.2	_GS[Phospho]QAILGDR_	_GS[+80]QAILGDR_	FALSE	40351.1	37937.9	26562.7	27398.3	45216.3	59296.4	1.25807	0.42488	0.000993746	5.13563e-05	0.00413549	0.00825178	0.0012486	0.000326807	43.4789	43.7174	43.4408	43.8096	43.6584	43.6479	1	1	1	1	1	1
A0A1P8ARV9	AT1G35220	FAM91 carboxy-terminus protein	5.76683e-18	0.898953	102683	AILSDDEDASR	TRUE	_AILS[Phospho]DDEDASR_.2	_AILS[Phospho]DDEDASR_	_AILS[+80]DDEDASR_	FALSE	10024912	9590989	10223144	8993881	9553997	9612637	0.943747	0.108392	1.58557e-42	9.49747e-33	6.23367e-37	5.76772e-21	4.15574e-21	3.80761e-19	49.1559	49.2433	49.1116	49.2693	49.1973	49.1721	1	1	1	1	1	1	31.5128	24.8708	33.9798	40.3096	39.0312	33.9183
A0A1P8ARV9	AT1G35220	FAM91 carboxy-terminus protein	5.76683e-18	0.898953	102683	ASISSTYR	TRUE	_AS[Phospho]ISSTYR_.2	_AS[Phospho]ISSTYR_	_AS[+80]ISSTYR_	FALSE	444774		596892	303319	345994	504258	0.738286	0.255222	0.00664799		0.00157014	0.000107829	0.00024762	0.00186924	40.6856		40.3884	40.8947	41.0058	40.8677	0.999411		0.999484	0.999537	0.999966	0.999552	10.5384		9.95447	15.5587	12.6822	10.6264
A0A1P8ARV9	AT1G35220	FAM91 carboxy-terminus protein	5.76683e-18	0.898953	102683	LMNYASGR	TRUE	_LMNYAS[Phospho]GR_.2	_LMNYAS[Phospho]GR_	_LMNYAS[+80]GR_	FALSE	478047	451384	528166	807489	618082	673957	1.4404	0.0241183	6.31213e-07	8.8147e-19	7.20418e-08	5.71336e-16	9.21445e-10	1.13373e-12	44.1363	44.1473	43.991	44.2698	44.2143	44.1701	0.999991	0.99992	0.999995	1	1	0.999998	12.6695	10.4372	13.2258	17.7251	19.8639	14.261
A0A1P8ARZ2	AT1G27500	Tetratricopeptide repeat (TPR)-like superfamily protein;Protein KINESIN LIGHT CHAIN-RELATED 3	2.64098e-18	0.899835	72508.1	SNSSNLDLEVMPR	TRUE	_SNS[Phospho]S[Phospho]NLDLEVM[Oxidation]PR_.2	_SNS[Phospho]S[Phospho]NLDLEVM[Oxidation]PR_	_SNS[+80]S[+80]NLDLEVM[+16]PR_	FALSE	659511		1.09057e+06	1.08351e+06		1.04495e+06	1.21621	0.474149	0.000206439		4.68204e-07	6.43219e-10		2.13456e-11	67.2364		67.1768	66.8839		66.7834	0.968853		0.952882	0.966891		0.941641	22.5441		14.685	19.9106		14.6839
A0A1P8AS81	AT1G04750	Vesicle-associated membrane protein 721;AT2G33120 protein;Vesicle-associated membrane protein 722;Vesicle-associated membrane protein 721	0.000293432	0.814604	16130.1	AATAQANSLNK	TRUE	_AATAQANS[Phospho]LNK_.2	_AATAQANS[Phospho]LNK_	_AATAQANS[+80]LNK_	FALSE	111095	156741	111052	116965	88349.3	128760	0.881722	0.483878	0.000918894	3.08518e-06	4.87281e-05	3.48337e-10	0.0040047	1.55093e-07	24.9525	25.0382	24.9574	25.1563	25.0395	24.8552	0.99976	0.999967	0.996718	0.998451	0.82334	0.998602	9.33353	11.307	6.71598	7.46829	2.53914	7.57106
A0A1P8ASC9	AT1G02960	Kinetochore protein;AT1G02960 protein;Kinetochore protein;Kinetochore protein;Kinetochore protein	9.62203e-11	0.879064	42754.9	EGLLFGSPK	TRUE	_EGLLFGS[Phospho]PK_.2	_EGLLFGS[Phospho]PK_	_EGLLFGS[+80]PK_	FALSE	45043.9	70177.8	84417.9	101881	100401	54775.8	1.28761	0.376935	2.22967e-09	0.00865829	0.00426108	0.00197373	0.00962487	0.00128804	77.2952	77.8035	77.5905	77.2255	77.6897	77.7565	1	1	1	1	1	1
A0A1P8ASF6	AT1G11870	Seryl-tRNA synthetase;Seryl-tRNA synthetase;Seryl-tRNA synthetase;Seryl-tRNA synthetase;Serine--tRNA ligase, chloroplastic/mitochondrial	3.17123e-05	0.851087	51534.1	QEVGSPR	TRUE	_QEVGS[Phospho]PR_.2	_QEVGS[Phospho]PR_	_QEVGS[+80]PR_	FALSE	473831	518652	613440	355966	480403	500902	0.832712	0.217172	4.06704e-05	7.28982e-05	2.84854e-05	8.67801e-10	0.000333223	3.00538e-10	18.6309	18.5576	18.5811	18.7416	18.7061	18.5353	1	1	1	1	1	1
A0A1P8ASJ0	AT1G52200	PLAC8 family protein;Protein PLANT CADMIUM RESISTANCE 8	1.99697e-07	0.866085	20946.1	VTTPSEEDSNNGLPVQQPGTPNQR	TRUE	_VTTPSEEDSNNGLPVQQPGT[Phospho]PNQR_.3	_VTTPSEEDSNNGLPVQQPGT[Phospho]PNQR_	_VTTPSEEDSNNGLPVQQPGT[+80]PNQR_	FALSE	5697399	5.66344e+06	5.12968e+06	3.94643e+06	3957859	4059635	0.725503	0.00129007	4.35591e-23	6.12714e-17	3.80101e-24	7.06777e-19	3.32475e-12	5.42351e-12	56.7408	57.0311	57.1042	56.8215	56.9192	57.1122	1	1	1	0.999999	1	1	23.5829	23.0153	25.1437	16.8532	20.8636	24.7518
A0A1P8ASK1	AT1G79570	Kinase superfamily with octicosapeptide/Phox/Bem1p domain-containing protein	1.46852e-24	0.915183	128910	DGGGTGSIPPALENEQMK	TRUE	_DGGGT[Phospho]GSIPPALENEQM[Oxidation]K_.2	_DGGGT[Phospho]GSIPPALENEQM[Oxidation]K_	_DGGGT[+80]GSIPPALENEQM[+16]K_	FALSE	108744	143040	175009		143802	182151	1.14559	0.520465	0.00672293	5.46051e-07	0.00146815		9.72466e-06	6.77059e-14	57.5013	57.4535	57.4963		57.3721	57.5963	0.779259	0.958251	0.937023		0.882305	0.987469	11.6902	6.87692	3.69994		9.94027	13.146
A0A1P8ASK1	AT1G79570	Kinase superfamily with octicosapeptide/Phox/Bem1p domain-containing protein	1.46852e-24	0.915183	128910	FSTVENGTSDIER	TRUE	_FS[Phospho]T[Phospho]VENGTSDIER_.2	_FS[Phospho]T[Phospho]VENGTSDIER_	_FS[+80]T[+80]VENGTSDIER_	FALSE	1		1	7108.69	1		3554.84	0.42265	0.00183081		0.00266283	0.0011887	0.00633784		56.3555		56.5189	56.3129	56.2405		0.996807		0.993587	0.989028	0.959112		10.4504		10.1467	11.4114	8.61296
A0A1P8ASK1	AT1G79570	Kinase superfamily with octicosapeptide/Phox/Bem1p domain-containing protein	1.46852e-24	0.915183	128910	LPYVSPLSR	TRUE	_LPYVSPLS[Phospho]R_.2	_LPYVSPLS[Phospho]R_	_LPYVSPLS[+80]R_	FALSE	1.45299e+06	1.45552e+06	1.1946e+06	1.60899e+06	1.45643e+06	1.384e+06	1.0844	0.349422	1.4967e-29	1.10871e-21	3.9425e-25	7.80072e-19	1.2896e-15	6.05579e-12	72.0112	72.4015	72.5686	72.071	72.5786	72.6776	0.991927	0.985503	0.999871	1	0.999991	0.999724	15.2437	14.8299	18.2004	20.6229	23.2241	20.5767
A0A1P8ASK1	AT1G79570	Kinase superfamily with octicosapeptide/Phox/Bem1p domain-containing protein	1.46852e-24	0.915183	128910	NTLVSGGVR	TRUE	_NT[Phospho]LVS[Phospho]GGVR_.2	_NT[Phospho]LVS[Phospho]GGVR_	_NT[+80]LVS[+80]GGVR_	FALSE	231135	274820	260644	315105	285948	309194	1.18738	0.0376361	0.000205997	8.87236e-10	1.64069e-05	1.10013e-16	2.35975e-14	1.22832e-15	43.6988	43.6149	43.6763	43.6763	43.4945	43.6682	1	1	1	1	1	1
A0A1P8ASK1	AT1G79570	Kinase superfamily with octicosapeptide/Phox/Bem1p domain-containing protein	1.46852e-24	0.915183	128910	NTLVSGGVR	TRUE	_NT[Phospho]LVSGGVR_.2	_NT[Phospho]LVSGGVR_	_NT[+80]LVSGGVR_	FALSE	340666	412670	457126	496250	418648	490933	1.1614	0.19734	2.21132e-09	2.61947e-14	1.19659e-21	7.42124e-12	1.94857e-08	6.31873e-12	41.1107	41.104	40.7467	41.135	41.3386	41.127	1	1	1	1	1	1	19.6392	16.957	17.1045	23.2711	25.3979	23.7483
A0A1P8ASK1	AT1G79570	Kinase superfamily with octicosapeptide/Phox/Bem1p domain-containing protein	1.46852e-24	0.915183	128910	TNSSLHEFGNK	TRUE	_TNS[Phospho]SLHEFGNK_.2	_TNS[Phospho]SLHEFGNK_	_TNS[+80]SLHEFGNK_	FALSE	555590	497915	528500	1.14883e+06	976036	546676	1.68871	0.113485	0.00020647	7.98514e-16	4.14639e-14	0.000107852	2.90958e-11	7.56123e-06	45.164	45.0183	44.8352	45.4009	45.5431	45.1787	0.999343	0.982064	0.936098	0.999891	0.999854	0.99947	9.37441	5.69602	4.37751	16.1667	11.4864	10.4839
A0A1P8ASK1	AT1G79570	Kinase superfamily with octicosapeptide/Phox/Bem1p domain-containing protein	1.46852e-24	0.915183	128910	TPDSEPKDEK	TRUE	_TPDS[Phospho]EPKDEK_.2	_TPDS[Phospho]EPKDEK_	_TPDS[+80]EPKDEK_	FALSE	1.85302e+06		3211253		1.79138e+06	2.67521e+06	0.881981	0.747639	9.41684e-15		1.10622e-40		2.88854e-14	1.42609e-10	22.3967		21.6128		22.447	22.1099	0.984654		0.999892		0.972669	0.999727	5.16147		10.1376		4.57202	9.20412
A0A1P8ASM1	AT1G08060	ATP-dependent helicase family protein;Helicase protein MOM1	5.67474e-07	0.863756	218698	ITSAASDEDVSSR	TRUE	_ITSAAS[Phospho]DEDVSSR_.2	_ITSAAS[Phospho]DEDVSSR_	_ITSAAS[+80]DEDVSSR_	FALSE	372029	424404	561418	320843	398356	437402	0.851788	0.367172	3.09281e-13	9.85491e-15	4.06477e-14	3.81803e-16	3.09644e-06	1.20379e-09	35.1513	35.0781	34.6977	35.1615	35.2095	35.1656	0.919385	0.989756	0.999389	0.998599	0.8351	0.997991	14.8594	13.7153	21.9855	18.353	12.883	17.8503
A0A1P8ASR5	AT1G56220	Dormancy/auxin associated family protein;Dormancy/auxin associated family protein;Dormancy-associated protein homolog 3	3.94111e-30	0.927216	17528.5	AAGGSETGPR	TRUE	_AAGGS[Phospho]ETGPR_.2	_AAGGS[Phospho]ETGPR_	_AAGGS[+80]ETGPR_	FALSE	76636.7	96030.8		83614.4	108504	87922.1	1.08123	0.60762	6.5269e-05	0.000998803		0.000445365	0.00275654	7.92353e-14	18.7608	18.6264		18.9188	18.8525	18.5881	0.963159	0.981231		0.971398	0.999233	0.96161	5.01734	5.95146		5.07792	10.4064	6.76595
A0A1P8ASR5	AT1G56220	Dormancy/auxin associated family protein;Dormancy/auxin associated family protein;Dormancy-associated protein homolog 3	3.94111e-30	0.927216	17528.5	AAGGSETGPR	TRUE	_AAGGSET[Phospho]GPR_.2	_AAGGSET[Phospho]GPR_	_AAGGSET[+80]GPR_	FALSE	159161	170540	178450	161097	182884	195492	1.06164	0.415306	7.63036e-07	1.02877e-11	0.000199551	5.01968e-15	2.0627e-05	8.04353e-07	16.486	16.5534	16.3542	16.4444	16.3147	16.3887	0.957177	0.998164	0.999374	0.994166	0.971577	0.999994	7.36179	12.3914	8.37484	12.4047	10.1747	14.7032
A0A1P8ASR5	AT1G56220	Dormancy/auxin associated family protein;Dormancy/auxin associated family protein;Dormancy-associated protein homolog 3	3.94111e-30	0.927216	17528.5	SYGEDSLPEEAVK	TRUE	_S[Phospho]YGEDSLPEEAVK_.2	_S[Phospho]YGEDSLPEEAVK_	_S[+80]YGEDSLPEEAVK_	FALSE	684707	672588	569162	683808	574912	553249	0.94057	0.522744	1.86271e-21	1.92938e-06	1.95329e-17	3.44385e-18	7.61897e-12	5.0781e-18	63.9082	64.051	64.1991	63.8022	64.0593	64.2243	0.999999	0.999303	0.999988	0.999855	0.999999	1	15.5106	10.2015	13.0526	10.5345	15.4147	16.7058
A0A1P8ASX4	AT1G48050	ATP-dependent DNA helicase 2 subunit KU80	1.63617e-18	0.90037	74861.3	DKPSGSDDEDNR	TRUE	_DKPSGS[Phospho]DDEDNR_.2	_DKPSGS[Phospho]DDEDNR_	_DKPSGS[+80]DDEDNR_	FALSE	2.13022e+06	2.34871e+06	2.53171e+06	1.50739e+06	2.08438e+06	1.99684e+06	0.797162	0.0908761	4.71874e-20	9.19037e-18	5.23679e-11	4.86149e-16	1.83203e-09	1.77143e-10	17.8291	17.8359	16.852	18.147	18.0751	17.3407	0.999949	1	1	1	1	0.99999	21.7132	18.3025	30.078	18.583	25.3498	19.4557
A0A1P8ASX9	AT1G50120	Immunoglobulin	8.66204e-26	0.917999	62431.2	ANDAYDSGEDGYDSSR	TRUE	_ANDAYDS[Phospho]GEDGYDSSR_.2	_ANDAYDS[Phospho]GEDGYDSSR_	_ANDAYDS[+80]GEDGYDSSR_	FALSE	330733	411147		469257	496405	514210	1.32984	0.037888	8.33694e-13	2.28968e-11		1.68535e-13	1.23561e-07	4.99637e-12	41.1733	41.182		41.1977	41.4011	41.3735	0.817014	0.803481		0.994866	0.996221	0.977863	22.3267	27.8992		30.0273	31.2662	28.5459
A0A1P8ASX9	AT1G50120	Immunoglobulin	8.66204e-26	0.917999	62431.2	DEISSVSSYPNK	TRUE	_DEISSVSS[Phospho]YPNK_.2	_DEISSVSS[Phospho]YPNK_	_DEISSVSS[+80]YPNK_	FALSE		430192	475365	177826	352098	344198	0.643524	0.121326		0.000425795	3.67746e-29	2.3603e-09	0.00034857	0.000365908		51.431	51.4867	51.2709	51.4156	51.5142		0.847564	0.99209	0.826886	0.840807	0.88231		9.35841	12.933	7.66272	5.89929	9.48902
A0A1P8ASX9	AT1G50120	Immunoglobulin	8.66204e-26	0.917999	62431.2	TFGSSLSLNSGPR	TRUE	_TFGS[Phospho]SLS[Phospho]LNSGPR_.2	_TFGS[Phospho]SLS[Phospho]LNSGPR_	_TFGS[+80]SLS[+80]LNSGPR_	FALSE	2.3005e+06	2.47768e+06	1.93027e+06	2803010	2.62998e+06		1.21481	0.11475	4.07952e-22	1.11714e-16	1.06024e-23	9.28912e-16	1.34486e-15		77.4992	77.3136	77.3158	77.3216	77.1839		0.95586	0.972877	0.953042	0.855603	0.984915		33.9354	28.4262	34.578	35.0979	35.4021
A0A1P8ASX9	AT1G50120	Immunoglobulin	8.66204e-26	0.917999	62431.2	TFGSSLSLNSGPR	TRUE	_TFGS[Phospho]SLSLNSGPR_.2	_TFGS[Phospho]SLSLNSGPR_	_TFGS[+80]SLSLNSGPR_	FALSE	1.3422e+06	1.10672e+06		1.21934e+06	1.13257e+06	1.16072e+06	0.956236	0.607648	4.33115e-41	1.08342e-34		3.61788e-23	2.30318e-23	2.12221e-20	75.5358	75.9363		75.5135	75.7909	76.1378	0.997038	0.821291		0.994399	0.985243	0.903451	22.8978	14.1299		25.7491	16.8715	15.5526
A0A1P8ASX9	AT1G50120	Immunoglobulin	8.66204e-26	0.917999	62431.2	TFGSSLSLNSGPR	TRUE	_TFGSSLS[Phospho]LNSGPR_.2	_TFGSSLS[Phospho]LNSGPR_	_TFGSSLS[+80]LNSGPR_	FALSE	1.80361e+06	2.27934e+06	1684654	1.32387e+06	1861894	1.69453e+06	0.846154	0.287707	9.05066e-39	1.02873e-19	3.2862e-20	3.1297e-18	1.27751e-08	3.9349e-15	69.7315	70.16	70.2952	69.749	70.1495	70.3128	0.999986	0.999995	0.999924	0.984883	0.999935	0.99996	42.3769	31.8341	25.2011	19.4032	28.0027	29.34
A0A1P8ASY0	AT1G67530	RING-type E3 ubiquitin transferase;U-box domain-containing protein 7	0.000302103	0.811808	60808	LALSDSESTK	TRUE	_LALS[Phospho]DSESTK_.2	_LALS[Phospho]DSESTK_	_LALS[+80]DSESTK_	FALSE	123113		143277	84941	99170.6	70459.1	0.637088	0.0343514	3.81702e-07		6.97676e-07	0.000128196	0.000285567	0.000296451	43.2417		43.1879	43.4494	43.3598	43.3646	0.947397		0.999899	0.947364	0.95967	0.996532	10.8842		11.3492	9.35495	8.78065	8.29266
A0A1P8AT01	AT1G11660	Heat shock protein 70 (Hsp 70) family protein;Heat shock 70 kDa protein 16	0.000159028	0.838871	81263	KSDDMELD	TRUE	_KS[Phospho]DDMELD_.2	_KS[Phospho]DDMELD_	_KS[+80]DDMELD_	FALSE	286368	362590	402496	437210	395771	310976	1.08798	0.57377	9.39961e-06	0.00130089	1.15211e-11	0.000168888	0.000364526	0.000209579	44.4153	44.2972	44.0673	44.6222	44.4563	44.3016	1	1	1	1	1	1
A0A1P8AT01	AT1G11660	Heat shock protein 70 (Hsp 70) family protein;Heat shock 70 kDa protein 16	0.000159028	0.838871	81263	SNSPPAKPEHNGSYGSR	TRUE	_SNS[Phospho]PPAKPEHNGSYGSR_.3	_SNS[Phospho]PPAKPEHNGSYGSR_	_SNS[+80]PPAKPEHNGSYGSR_	FALSE	567180	675592		846599	705337	502581	1.10211	0.67056	0.00284137	0.000243198		0.000214261	2.86445e-10	0.00198323	38.623	38.338		39.186	38.6197	38.6987	0.756554	0.87727		0.975686	0.989835	0.994541	10.9109	11.4272		19.0378	13.1241	19.7223
A0A1P8AT08	AT1G04120	Multidrug resistance-associated protein 5;Multidrug resistance-associated protein 5;ABC transporter C family member 5	0.000121175	0.842236	164606	DDTVSASNLSLER	TRUE	_DDTVSAS[Phospho]NLSLER_.2	_DDTVSAS[Phospho]NLSLER_	_DDTVSAS[+80]NLSLER_	FALSE	104291		77019.3	54358.3	82473.7	71162.7	0.764783	0.241414	1.16424e-07		0.00425185	0.00027934	0.00159359	0.00116346	66.7054		66.8606	66.6755	66.7941	66.7749	0.98599		0.935445	0.954694	0.958959	0.788721	7.12429		7.87553	5.90987	6.02435	9.40563
A0A1P8AT08	AT1G04120	Multidrug resistance-associated protein 5;Multidrug resistance-associated protein 5;ABC transporter C family member 5	0.000121175	0.842236	164606	EVQEGGSASDLK	TRUE	_EVQEGGS[Phospho]ASDLK_.2	_EVQEGGS[Phospho]ASDLK_	_EVQEGGS[+80]ASDLK_	FALSE	401174	385973	499184	333630		390231	0.8441	0.276845	0.000164972	8.19862e-16	1.04375e-07	3.67007e-12		0.000391286	35.053	35.0105	34.5528	35.0632		35.0978	0.7953	0.964063	0.871759	0.922473		0.910847	2.35717	5.84051	2.9166	3.83493		3.34641
A0A1P8AT87	AT1G63640	p-loop nucleoside triphosphate hydrolases superfamily protein with CH (Calponin Homology) domain-containing protein;p-loop nucleoside triphosphate hydrolases superfamily protein with CH (Calponin Homology) domain-containing protein;Kinesin-like protein KIN-14J;p-loop nucleoside triphosphate hydrolases superfamily protein with CH (Calponin Homology) domain-containing protein	1.8305e-17	0.897676	119872	HSIGASPNAR	TRUE	_HSIGAS[Phospho]PNAR_.2	_HSIGAS[Phospho]PNAR_	_HSIGAS[+80]PNAR_	FALSE	835170	1.12449e+06	1.23567e+06	912436	1.14556e+06	1.11309e+06	0.992413	0.956698	7.45492e-27	2.10485e-14	9.93458e-23	1.11603e-09	0.000783595	0.000270847	32.3708	31.8752	31.3896	33.0597	32.304	32.2011	0.999964	0.999971	0.999301	0.998843	0.98917	0.998518	11.2393	11.7362	10.136	7.76083	5.51452	9.67681
A0A1P8AT87	AT1G63640	p-loop nucleoside triphosphate hydrolases superfamily protein with CH (Calponin Homology) domain-containing protein;p-loop nucleoside triphosphate hydrolases superfamily protein with CH (Calponin Homology) domain-containing protein;Kinesin-like protein KIN-14J;p-loop nucleoside triphosphate hydrolases superfamily protein with CH (Calponin Homology) domain-containing protein	1.8305e-17	0.897676	119872	LVGPTSPR	TRUE	_LVGPTS[Phospho]PR_.2	_LVGPTS[Phospho]PR_	_LVGPTS[+80]PR_	FALSE	4.2826e+06	4.71292e+06	6003944	6.44449e+06	6579153	6818122	1.32283	0.0379	2.72511e-27	1.08339e-22	6.22947e-33	2.74817e-20	6.60679e-14	4.65503e-18	36.5895	36.765	36.4347	36.8921	36.8019	36.7732	0.998291	0.999985	0.999999	0.999999	0.999975	1	33.9678	40.8843	35.6528	37.6282	47.1091	31.9643
A0A1P8AT97	AT1G64790	ILITYHIA;Protein ILITYHIA	7.11593e-34	0.934564	293158	ALLEGGSDDEGASTEAQGR	TRUE	_ALLEGGS[Phospho]DDEGASTEAQGR_.2	_ALLEGGS[Phospho]DDEGASTEAQGR_	_ALLEGGS[+80]DDEGASTEAQGR_	FALSE	86661264	85490856	81965760	75851320	70373960	74620088	0.869067	0.00702129	2.89703e-65	1.5183e-42	3.02366e-54	3.75574e-35	6.30397e-30	1.7781e-30	53.4357	53.4329	53.2132	53.272	53.3862	53.4541	1	1	1	1	1	1	57.9488	83.8645	66.6157	61.0921	66.3581	72.0165
A0A1P8AT97	AT1G64790	ILITYHIA;Protein ILITYHIA	7.11593e-34	0.934564	293158	FPEQSDDSESDDDNVSG	TRUE	_FPEQS[Phospho]DDS[Phospho]ES[Phospho]DDDNVSG_.2	_FPEQS[Phospho]DDS[Phospho]ES[Phospho]DDDNVSG_	_FPEQS[+80]DDS[+80]ES[+80]DDDNVSG_	FALSE	932343	328234	889743	291502	455963	376316	0.522611	0.162865	0.000198593	0.00698179	0.00353796	0.00853961	0.00225063	0.00488253	57.8594	57.9963	56.8549	57.9555	57.5769	57.0629	0.902515	0.982353	0.90696	0.938387	0.901643	0.992593	2.98211	4.9828	3.2243	3.58251	2.96949	6.70835
A0A1P8ATB0	AT1G68100	ZIP metal ion transporter family;IAA-alanine resistance protein 1	4.25184e-05	0.849633	46896.5	KTSASDATDK	TRUE	_KTS[Phospho]ASDATDK_.2	_KTS[Phospho]ASDATDK_	_KTS[+80]ASDATDK_	FALSE	485680	531031	659121	424716	449265	469525	0.801695	0.107273	7.17435e-07	2.03382e-10	3.21968e-14	4.12857e-08	4.31407e-05	4.21623e-06	12.4329	12.5382	12.397	12.6699	12.84	12.446	0.988304	0.997947	0.995805	0.978293	0.999626	0.994211	24.8389	18.048	27.8505	16.1341	22.7799	24.1296
A0A1P8ATB0	AT1G68100	ZIP metal ion transporter family;IAA-alanine resistance protein 1	4.25184e-05	0.849633	46896.5	SDSGTEITSDGK	TRUE	_SDS[Phospho]GTEITSDGK_.2	_SDS[Phospho]GTEITSDGK_	_SDS[+80]GTEITSDGK_	FALSE	235335	225183	272950		253568	231241	0.991473	0.925486	9.12805e-05	0.000102733	7.51543e-15		2.52104e-08	0.00198568	30.6337	30.4137	30.2341		30.645	30.6805	0.957857	0.846019	0.961954		0.959903	0.99793	13.8602	13.4579	12.4207		12.3755	15.3064
A0A1P8ATC1	AT1G15420	WD repeat protein	0.00152798	0.769464	24213.5	VNSEESNR	TRUE	_VNS[Phospho]EESNR_.2	_VNS[Phospho]EESNR_	_VNS[+80]EESNR_	FALSE	41906.6	40586.2	51833.3	28554.1	37693.6	29512.1	0.712891	0.0485791	0.00349018	0.000555861	0.00102178	0.000394604	0.00029682	0.000373977	13.3451	13.5382	13.3907	13.6375	13.5012	13.4751	0.99991	0.999876	0.979779	0.996942	0.999909	0.999812	10.3199	9.99533	5.43535	6.7868	10.2995	9.57923
A0A1P8ATC8	AT1G24764	Microtubule-associated proteins 70-2;Microtubule-associated proteins 70-2;Microtubule-associated protein 70-2	4.56411e-23	0.911678	77124.2	ALLNGPGNYSFNK	TRUE	_ALLNGPGNYS[Phospho]FNK_.2	_ALLNGPGNYS[Phospho]FNK_	_ALLNGPGNYS[+80]FNK_	FALSE	2.48794e+06	2030995	1.9189e+06	4.60862e+06	3.98057e+06	4406698	2.01868	0.00100287	1.24839e-08	6.1139e-14	7.26873e-31	8.75461e-11	5.62429e-06	0.000288113	75.4777	75.8629	75.9124	75.5171	75.7485	76.0952	0.999539	0.999998	0.888307	1	0.777997	1	8.68132	14.3328	3.07356	29.2486	2.25403	18.8053
A0A1P8ATC8	AT1G24764	Microtubule-associated proteins 70-2;Microtubule-associated proteins 70-2;Microtubule-associated protein 70-2	4.56411e-23	0.911678	77124.2	SFDGGTR	TRUE	_S[Phospho]FDGGTR_.2	_S[Phospho]FDGGTR_	_S[+80]FDGGTR_	FALSE	3.50743e+06	4.76268e+06	5.29072e+06	4637850	5782279	6097788	1.21806	0.226456	5.4254e-45	1.63819e-41	1.7373e-41	1.63909e-26	9.23239e-20	9.01926e-25	27.2015	27.1329	26.8074	27.19	27.2107	26.7364	1	1	1	1	1	1	24.6374	15.9025	24.2262	30.095	34.3272	30.635
A0A1P8ATG6	AT1G33050	Uncharacterized protein;Uncharacterized protein;Uncharacterized protein;Uncharacterized protein At1g33050	4.27744e-29	0.925114	72256	LGLSCVSEK	TRUE	_LGLSC[Carbamidomethyl]VS[Phospho]EK_.2	_LGLSC[Carbamidomethyl]VS[Phospho]EK_	_LGLSC[+57]VS[+80]EK_	FALSE	124292		111260	72589.4	85391.3	78929.7	0.67051	0.0107084	0.000995842		0.000301829	0.00464355	0.00232712	0.00884517	53.5713		53.3337	53.4997	53.6753	53.5284	0.977206		0.949152	0.959099	0.890099	0.953929	6.21704		3.92674	4.15483	3.09175	4.0304
A0A1P8ATG6	AT1G33050	Uncharacterized protein;Uncharacterized protein;Uncharacterized protein;Uncharacterized protein At1g33050	4.27744e-29	0.925114	72256	QFSLADAK	TRUE	_QFS[Phospho]LADAK_.2	_QFS[Phospho]LADAK_	_QFS[+80]LADAK_	FALSE	1.18391e+06	1.03054e+06	909870	1.01575e+06	1.00152e+06	916615	0.939047	0.497257	1.27967e-13	2.14665e-14	3.34573e-17	1.03033e-11	5.61798e-10	1.88198e-12	58.5996	58.614	58.4741	58.4804	58.6401	58.6499	1	1	1	1	1	1
A0A1P8ATG6	AT1G33050	Uncharacterized protein;Uncharacterized protein;Uncharacterized protein;Uncharacterized protein At1g33050	4.27744e-29	0.925114	72256	RSTDDLSGFR	TRUE	_RS[Phospho]TDDLSGFR_.2	_RS[Phospho]TDDLSGFR_	_RS[+80]TDDLSGFR_	FALSE	434133	329142	136323	328427	322282	194803	0.939879	0.86227	0.00114201	1.13255e-11	3.16934e-08	0.00065757	5.768e-05	0.0010807	58.0781	59.4455	60.4011	58.3121	59.5171	60.3878	0.943124	0.892625	0.875204	0.989448	0.913789	0.932482	6.22939	7.48265	6.11459	8.35364	6.87992	6.02942
A0A1P8ATG6	AT1G33050	Uncharacterized protein;Uncharacterized protein;Uncharacterized protein;Uncharacterized protein At1g33050	4.27744e-29	0.925114	72256	STDDLSGFR	TRUE	_S[Phospho]TDDLSGFR_.2	_S[Phospho]TDDLSGFR_	_S[+80]TDDLSGFR_	FALSE	4709601	4.7151e+06	4.19835e+06	4.28524e+06	4.12411e+06	4.14851e+06	0.921809	0.117604	7.58738e-35	5.78976e-24	4.68702e-27	8.32873e-20	7.24493e-18	5.06331e-16	58.1759	58.0823	58.0339	58.0875	58.124	58.1951	0.954636	0.976812	0.996901	0.998903	0.962518	0.888974	33.9155	34.5748	25.8617	38.323	30.0667	33.0313
A0A1P8ATH2	AT1G04080	Tetratricopeptide repeat (TPR)-like superfamily protein	2.63775e-26	0.919161	60958.3	SQVDGSTEQSPK	TRUE	_SQVDGSTEQS[Phospho]PK_.2	_SQVDGSTEQS[Phospho]PK_	_SQVDGSTEQS[+80]PK_	FALSE	28232726	28078496	40059208	25465672	30824956	34803372	0.945248	0.732748	1.21189e-47	5.44e-34	2.9406e-39	1.02302e-30	5.71555e-29	5.79704e-28	22.5798	22.6495	22.2938	22.5946	22.616	22.4949	1	1	1	1	1	1	51.1201	47.2177	40.6325	47.1598	37.7338	40.8951
A0A1P8ATJ7	AT1G20696	High mobility group B3;High mobility group B3;High mobility group B protein 2;High mobility group B protein 3	2.6102e-07	0.865501	11293.2	SLSDSEK	TRUE	_SLS[Phospho]DSEK_.2	_SLS[Phospho]DSEK_	_SLS[+80]DSEK_	FALSE	2.3051e+06	2.29781e+06	3283662	2.25333e+06	2.68983e+06	3.0521e+06	1.01378	0.9323	0.000209665	1.23256e-14	2.17936e-16	9.77978e-22	5.0715e-07	2.31074e-14	19.3127	19.449	19.3579	19.4567	19.5175	19.2692	0.999169	0.999996	0.986072	0.999699	0.999839	0.999967	9.92718	15.0891	7.87635	10.9565	12.1056	15.0009
A0A1P8ATK8	AT1G69935	Short hypocotyl in white light1;Protein SHORT HYPOCOTYL IN WHITE LIGHT 1	1.48672e-14	0.890146	17880.1	FFGGGDNYDVVPDDDGFSDDDDEEDER	TRUE	_FFGGGDNYDVVPDDDGFS[Phospho]DDDDEEDER_.3	_FFGGGDNYDVVPDDDGFS[Phospho]DDDDEEDER_	_FFGGGDNYDVVPDDDGFS[+80]DDDDEEDER_	FALSE	2.53752e+06	2.32868e+06	2006990	1.5113e+06	1.72459e+06	1.82923e+06	0.736938	0.0288348	1.20365e-21	3.11304e-21	2.07453e-19	3.11481e-15	6.99054e-10	1.13303e-15	93.5436	93.9162	93.7327	93.3863	93.8136	94.2451	0.903636	0.998065	0.997877	0.995391	0.968303	0.976752	8.62884	7.35733	7.15272	7.2141	6.34399	7.90133
A0A1P8ATL2	AT1G09340	Chloroplast RNA binding protein;Chloroplast stem-loop binding protein of 41 kDa b, chloroplastic	6.4815e-17	0.896275	43266.4	LETESLLQSK	TRUE	_LETESLLQS[Phospho]K_.2	_LETESLLQS[Phospho]K_	_LETESLLQS[+80]K_	FALSE	255753	81829.2		164302	216284	169421	1.08617	0.844895	0.000867321	0.00489564		0.00231018	0.00137675	0.000349415	61.7637	62.9818		62.013	62.0385	62.1247	0.790954	0.775852		0.867732	0.925713	0.925696	5.94403	3.53582		4.07508	5.15806	5.48539
A0A1P8ATL2	AT1G09340	Chloroplast RNA binding protein;Chloroplast stem-loop binding protein of 41 kDa b, chloroplastic	6.4815e-17	0.896275	43266.4	QLPGESDQDFADFSSK	TRUE	_QLPGES[Phospho]DQDFADFSSK_.2	_QLPGES[Phospho]DQDFADFSSK_	_QLPGES[+80]DQDFADFSSK_	FALSE	513005	469162	500405	258973	325018	361037	0.637425	0.00534277	0.000204538	0.000118836	0.00310984	2.10028e-05	0.00477425	0.00175918	79.7823	80.1651	80.0491	79.8203	80.1295	80.2441	0.999208	0.999964	0.999999	0.989575	0.981247	0.998403	8.8329	11.9159	15.6911	6.24619	6.14616	8.13138
A0A1P8ATW1	AT1G55150	DEA(D/H)-box RNA helicase family protein;DEAD-box ATP-dependent RNA helicase 20	0.000140546	0.840569	58521.6	KDNDGNESPR	TRUE	_KDNDGNES[Phospho]PR_.2	_KDNDGNES[Phospho]PR_	_KDNDGNES[+80]PR_	FALSE	3.7075e+06	3.49077e+06	4.66837e+06	4137649	4.00216e+06	4030226	1.02557	0.79502	2.4044e-05	2.19616e-12	4.55237e-17	1.86886e-11	4.16331e-07	8.90464e-11	11.8016	11.8597	11.6539	11.9296	12.1797	11.7997	1	1	1	1	1	1
A0A1P8ATX4	AT1G33240	GT-2-like 1	1.05999e-51	0.964185	71327.2	SAAFEIAFQSPANR	TRUE	_SAAFEIAFQS[Phospho]PANR_.2	_SAAFEIAFQS[Phospho]PANR_	_SAAFEIAFQS[+80]PANR_	FALSE	13435249	12270338	9884148	13714652	14978271	15141278	1.23165	0.0732027	2.46487e-10	7.05458e-09	2.20729e-10	2.55587e-14	6.67898e-06	3.40674e-08	86.2483	87.377	87.5622	86.6363	87.4488	87.8364	1	1	0.999997	1	1	0.999999	19.1541	19.232	13.816	17.6449	16.8451	14.4062
A0A1P8AU02	AT1G05940	Cationic amino acid transporter 9;Cationic amino acid transporter 9;Cationic amino acid transporter 9, chloroplastic	1.0442e-05	0.855561	55596.2	STSGDSLVR	TRUE	_STS[Phospho]GDSLVR_.2	_STS[Phospho]GDSLVR_	_STS[+80]GDSLVR_	FALSE	631332	663776	850206	494031	464744	439071	0.651581	0.0236218	2.36545e-17	9.40335e-12	2.21243e-14	8.62845e-05	1.33703e-07	2.98358e-05	37.6097	37.6783	37.3181	37.9116	37.745	37.5474	0.999856	0.999865	0.999855	0.995106	0.999773	0.988175	15.8506	17.7381	13.4918	11.6339	14.6776	12.2063
A0A1P8AU89	AT1G63480	AT-hook motif nuclear-localized protein;AT-hook motif nuclear-localized protein 12	1.09877e-13	0.887797	37652	DSSPMSDPNEPK	TRUE	_DSS[Phospho]PMSDPNEPK_.2	_DSS[Phospho]PMSDPNEPK_	_DSS[+80]PMSDPNEPK_	FALSE	353476	401042	541544	580653	593336	633248	1.39441	0.0438629	3.09458e-14	9.13024e-09	2.12637e-17	1.76212e-09	1.7128e-10	7.79229e-11	34.2889	34.2148	33.8022	34.2532	34.3158	34.1487	0.936992	0.909512	0.900039	0.967769	0.93674	0.96347	9.4019	10.6837	9.80042	10.8887	9.03059	12.9518
A0A1P8AU94	AT1G22870	Kinase family with ARM repeat domain-containing protein	3.37128e-08	0.869623	82161.1	QSFNATAQPANDETR	TRUE	_QS[Phospho]FNATAQPANDETR_.2	_QS[Phospho]FNATAQPANDETR_	_QS[+80]FNATAQPANDETR_	FALSE	56785.3	118942	117091	56205	154315	132253	1.1706	0.668196	0.000206505	3.3966e-06	4.00965e-20	3.86729e-14	9.80508e-08	3.81012e-05	44.1511	44.1129	44.052	44.2202	43.9772	44.1357	0.999049	0.866135	0.787454	0.983447	0.999021	0.899686	11.2319	11.5358	11.8168	11.4484	16.7018	14.5629
A0A1P8AUA0	AT1G51690	Serine/threonine-protein phosphatase 2A 55 kDa regulatory subunit B;Serine/threonine-protein phosphatase 2A 55 kDa regulatory subunit B;Serine/threonine protein phosphatase 2A 55 kDa regulatory subunit B alpha isoform	1.2093e-30	0.928244	68066.3	ALSSITR	TRUE	_ALS[Phospho]SITR_.2	_ALS[Phospho]SITR_	_ALS[+80]SITR_	FALSE	5.09865e+06	4.58655e+06	4.60992e+06	4.17544e+06	4422804	4.34711e+06	0.905579	0.0690679	1.94439e-45	1.33263e-32	1.1286e-33	1.11828e-29	5.10035e-17	8.55287e-19	50	50.2952	50.0963	50.1592	50.18	50.1554	0.999968	0.996687	0.999505	0.999974	0.999992	0.999802	25.6632	23.7309	23.3723	22.2232	26.2406	26.5571
A0A1P8AUF0	AT1G34120	Inositol polyphosphate 5-phosphatase I;Inositol polyphosphate 5-phosphatase I;Type I inositol polyphosphate 5-phosphatase 1	2.04239e-25	0.917167	54503.2	QFSTPNTPDR	TRUE	_QFS[Phospho]TPNTPDR_.2	_QFS[Phospho]TPNTPDR_	_QFS[+80]TPNTPDR_	FALSE	1.27985e+06	1.31285e+06	1.53849e+06	1.11971e+06	1.19943e+06	1.14623e+06	0.838833	0.0585635	6.29574e-32	9.84104e-11	8.8992e-22	6.66854e-18	1.87769e-11	2.90372e-17	44.7236	44.6087	44.6252	44.7461	44.6726	44.6621	0.999572	0.999763	0.999903	0.999653	0.999725	0.990373	18.5971	16.4687	13.3208	23.7961	18.9926	20.3896
A0A1P8AUF0	AT1G34120	Inositol polyphosphate 5-phosphatase I;Inositol polyphosphate 5-phosphatase I;Type I inositol polyphosphate 5-phosphatase 1	2.04239e-25	0.917167	54503.2	SQEFDPISSGVTNPR	TRUE	_S[Phospho]QEFDPISSGVTNPR_.2	_S[Phospho]QEFDPISSGVTNPR_	_S[+80]QEFDPISSGVTNPR_	FALSE	6098218	6101338	5522234	5027663	4.70801e+06	4.43845e+06	0.799813	0.0100243	4.73014e-40	2.00482e-24	4.60028e-33	4.06095e-25	8.86216e-14	8.02115e-16	71.7987	71.989	71.9848	71.7971	72.0263	72.1876	1	1	1	1	1	1	41.2134	39.3533	33.9102	40.8527	36.1947	35.7281
A0A1P8AUF0	AT1G34120	Inositol polyphosphate 5-phosphatase I;Inositol polyphosphate 5-phosphatase I;Type I inositol polyphosphate 5-phosphatase 1	2.04239e-25	0.917167	54503.2	SHSDPPSPSK	TRUE	_SHS[Phospho]DPPS[Phospho]PSK_.2	_SHS[Phospho]DPPS[Phospho]PSK_	_SHS[+80]DPPS[+80]PSK_	FALSE	1.37962e+06	1528615	2021370	1.18802e+06	1.50957e+06	1.49057e+06	0.849591	0.324351	3.7342e-08	1.92504e-08	2.73873e-07	2.46035e-09	4.55936e-08	5.69412e-09	17.7147	17.6902	17.2232	17.7353	17.8661	17.6662	0.998988	0.996347	0.99998	0.999429	0.999971	0.999966	31.055	30.2513	30.561	28.0088	35.9514	32.4008
A0A1P8AUF2	AT1G21580	Zinc finger C-x8-C-x5-C-x3-H type family protein;Zinc finger C-x8-C-x5-C-x3-H type family protein;Zinc finger C-x8-C-x5-C-x3-H type family protein;Zinc finger C-x8-C-x5-C-x3-H type family protein;Uncharacterized protein At1g21580	7.13963e-21	0.906322	225212	EASNELNR	TRUE	_EAS[Phospho]NELNR_.2	_EAS[Phospho]NELNR_	_EAS[+80]NELNR_	FALSE		225658	237598	171310	212793	188713	0.824335	0.0862376		0.00169813	0.000682557	0.0052255	0.00347068	0.007296		28.6503	28.0782	28.7887	28.7437	28.5793		1	1	1	1	1
A0A1P8AUF2	AT1G21580	Zinc finger C-x8-C-x5-C-x3-H type family protein;Zinc finger C-x8-C-x5-C-x3-H type family protein;Zinc finger C-x8-C-x5-C-x3-H type family protein;Zinc finger C-x8-C-x5-C-x3-H type family protein;Uncharacterized protein At1g21580	7.13963e-21	0.906322	225212	NVDSLSPENDSSR	TRUE	_NVDSLS[Phospho]PENDSSR_.2	_NVDSLS[Phospho]PENDSSR_	_NVDSLS[+80]PENDSSR_	FALSE	1.34886e+06	1.32417e+06	1.48394e+06	1.33011e+06	1382815	1.51971e+06	1.01821	0.754201	2.78004e-26	2.05322e-21	4.18415e-29	1.19324e-21	3.89872e-14	3.78147e-13	42.61	42.8028	42.5868	42.8338	42.8364	42.8103	0.999878	0.999999	0.99998	0.999991	0.999969	0.999975	28.9641	31.9471	28.4456	27.7419	32.228	37.305
A0A1P8AUF2	AT1G21580	Zinc finger C-x8-C-x5-C-x3-H type family protein;Zinc finger C-x8-C-x5-C-x3-H type family protein;Zinc finger C-x8-C-x5-C-x3-H type family protein;Zinc finger C-x8-C-x5-C-x3-H type family protein;Uncharacterized protein At1g21580	7.13963e-21	0.906322	225212	PVASPTSAGIR	TRUE	_PVAS[Phospho]PTSAGIR_.2	_PVAS[Phospho]PTSAGIR_	_PVAS[+80]PTSAGIR_	FALSE	1.00084e+06	1.07273e+06	1068317	1.25525e+06	1.28023e+06	1.37458e+06	1.24449	0.00404148	1.59049e-36	3.69878e-27	8.21916e-26	3.30982e-21	1.13149e-17	8.37493e-16	43.3645	43.5417	43.3725	43.6339	43.4828	43.5336	1	1	0.999998	0.999976	1	1	26.3899	29.2177	19.6236	22.2021	23.46	26.6415
A0A1P8AUK8	AT1G22850	SNARE associated Golgi protein family;At1g22850/F29G20_19	0.000113406	0.84288	32337.3	SESDDDGGSEGDAAIK	TRUE	_SES[Phospho]DDDGGSEGDAAIK_.2	_SES[Phospho]DDDGGSEGDAAIK_	_SES[+80]DDDGGSEGDAAIK_	FALSE	695631		946118	623956	598731	630712	0.752612	0.120033	2.2536e-13		6.05257e-16	3.00388e-12	4.99473e-07	8.45892e-09	34.8879		34.4029	34.852	34.8844	34.8405	0.975797		0.867926	0.867499	0.862476	0.865933	23.4421		21.905	21.2	19.1613	21.2176
A0A1P8AUP4	AT1G27430	GYF domain-containing protein	3.80294e-12	0.883432	152238	SPTPVPMGNPSDPNPK	TRUE	_S[Phospho]PTPVPM[Oxidation]GNPSDPNPK_.2	_S[Phospho]PTPVPM[Oxidation]GNPSDPNPK_	_S[+80]PTPVPM[+16]GNPSDPNPK_	FALSE		446239	544928	784861	768750	748071	1.54813	0.00619045		0.0003548	3.04724e-09	8.64618e-05	2.18953e-07	0.000304891		41.7302	41.6045	42.2067	42.41	41.8148		0.98349	0.824574	0.787951	0.763874	0.88303		24.1028	19.7441	20.1239	30.2089	21.6638
A0A1P8AUP4	AT1G27430	GYF domain-containing protein	3.80294e-12	0.883432	152238	SPTPVPMGNPSDPNPK	TRUE	_S[Phospho]PTPVPMGNPSDPNPK_.2	_S[Phospho]PTPVPMGNPSDPNPK_	_S[+80]PTPVPMGNPSDPNPK_	FALSE	520585	494727	562094		1.2323e+06	1.07823e+06	2.19716	0.00210974	2.72575e-08	2.34978e-23	1.64102e-20		1.03915e-17	2.90148e-12	52.7482	52.6836	52.5709		52.7599	52.7818	0.856028	0.918042	0.906049		0.931633	0.905475	19.3711	24.8864	22.5107		23.3105	32.4701
A0A1P8AUR0	AT1G21170	Exocyst complex component SEC5;Exocyst complex component SEC5B	4.23779e-27	0.920901	123630	ESQPMGSPVQAR	TRUE	_ESQPM[Oxidation]GS[Phospho]PVQAR_.2	_ESQPM[Oxidation]GS[Phospho]PVQAR_	_ESQPM[+16]GS[+80]PVQAR_	FALSE	833278	3017871	123004	74030.6	625329	2.57533e+06	0.823996	0.849896	0.00677801	0.000285053	0.000835595	0.00880406	1.04985e-05	0.00205222	28.209	28.2018	27.7684	28.1535	28.2489	28.1144	0.999999	0.999954	1	1	1	1	15.319	12.6537	24.8583	26.4128	21.5793	21.4528
A0A1P8AUR0	AT1G21170	Exocyst complex component SEC5;Exocyst complex component SEC5B	4.23779e-27	0.920901	123630	TSTDSPSR	TRUE	_TSTDS[Phospho]PSR_.2	_TSTDS[Phospho]PSR_	_TSTDS[+80]PSR_	FALSE	110843	59278.3	117119	97812.1	78331.4	103176	0.972425	0.900449	3.00781e-06	0.000593013	8.13122e-13	0.000231125	0.00110706	0.000263887	12.4218	12.3246	12.1988	12.457	12.5662	12.2489	0.942072	0.943361	0.926987	0.873683	0.937339	0.924263	14.3701	12.0728	10.8158	10.4072	11.1727	12.6798
A0A1P8AUR0	AT1G21170	Exocyst complex component SEC5;Exocyst complex component SEC5B	4.23779e-27	0.920901	123630	VVLTSLQSFPR	TRUE	_VVLTSLQS[Phospho]FPR_.2	_VVLTSLQS[Phospho]FPR_	_VVLTSLQS[+80]FPR_	FALSE	7.20115e+06	6486014	5.48895e+06	7886944	7.63522e+06	7.46328e+06	1.19865	0.0680357	1.40784e-35	1.53377e-24	9.52994e-28	1.66422e-24	3.64454e-17	7.98584e-16	86.6651	87.3614	87.0356	86.8368	87.2942	87.4963	1	1	1	1	1	1	25.578	26.175	21.783	26.7154	36.5791	31.4832
A0A1P8AUR4	AT1G03370	C2 calcium/lipid-binding and GRAM domain containing protein;C2 and GRAM domain-containing protein At1g03370	4.21446e-15	0.89159	89041.1	NSVLDLTSSGDQTSASR	TRUE	_NS[Phospho]VLDLTSSGDQTSASR_.2	_NS[Phospho]VLDLTSSGDQTSASR_	_NS[+80]VLDLTSSGDQTSASR_	FALSE	1.01206e+06	984998	957913	1.12632e+06	1.13277e+06	1.06484e+06	1.12486	0.00998615	9.92379e-25	2.53044e-14	2.31721e-15	3.86673e-24	7.01109e-09	2.90779e-10	61.7503	62.0307	61.9597	61.8459	61.9328	62.0035	0.999998	0.999998	1	0.999561	0.999999	0.999998	17.8096	22.4997	27.3945	22.5663	25.4439	25.4691
A0A1P8AUV2	AT1G05230	Homeodomain GLABROUS 2;Homeodomain GLABROUS 2;Homeobox-leucine zipper protein HDG2	1.09149e-17	0.898245	68178.8	DDEFDSPNTK	TRUE	_DDEFDS[Phospho]PNTK_.2	_DDEFDS[Phospho]PNTK_	_DDEFDS[+80]PNTK_	FALSE	1.37696e+06	1.18662e+06	1.4789e+06	1.38596e+06	1.35042e+06	1429428	1.03051	0.666947	1.42448e-21	2.1201e-17	3.2477e-28	5.37697e-17	3.33752e-11	3.66406e-13	37.102	37.1547	36.9174	37.3736	37.222	37.1626	0.994889	0.999266	0.999949	0.998842	0.998786	0.96429	9.28011	15.4242	17.1929	14.8117	13.2364	11.3451
A0A1P8AUZ4	AT1G10890	Arginine/glutamate-rich 1 protein;Arginine/glutamate-rich 1 protein;Uncharacterized protein At1g10890	1.85656e-05	0.853409	28874.9	SPAATLESAK	TRUE	_S[Phospho]PAATLESAK_.2	_S[Phospho]PAATLESAK_	_S[+80]PAATLESAK_	FALSE	937802	1.02358e+06	1.163e+06	951708	981634	1.13552e+06	0.98223	0.841736	3.61602e-07	5.71736e-19	6.79625e-11	3.47306e-09	1.38343e-05	0.000288203	42.7908	42.9989	42.7986	43.0451	43.0018	42.9603	1	1	1	1	1	1	19.4343	18.1073	21.1828	19.2353	21.8439	22.0462
A0A1P8AUZ8	AT1G74040	2-isopropylmalate synthase;2-isopropylmalate synthase 1;2-isopropylmalate synthase 2, chloroplastic;2-isopropylmalate synthase 1, chloroplastic	4.97187e-06	0.857998	59962.3	DGEQSPGATLTSK	TRUE	_DGEQS[Phospho]PGATLTSK_.2	_DGEQS[Phospho]PGATLTSK_	_DGEQS[+80]PGATLTSK_	FALSE		240343	250425	222792	175777	260150	0.894814	0.475593		0.000288074	7.89983e-07	1.16786e-06	0.000844665	0.00244668		39.5962	39.4988	39.7677	39.7703	39.5576		0.998899	0.99793	0.975302	0.989963	0.760303		8.90925	8.27678	5.77463	6.72214	3.8023
A0A1P8AUZ9	AT1G13220	Nuclear matrix constituent protein-like protein;Protein CROWDED NUCLEI 2	7.69191e-14	0.888217	131514	CTSIIFSPSK	TRUE	_C[Carbamidomethyl]TS[Phospho]IIFSPSK_.2	_C[Carbamidomethyl]TS[Phospho]IIFSPSK_	_C[+57]TS[+80]IIFSPSK_	FALSE	294022	226338	155642	247165	266155	239141	1.11311	0.565548	1.3883e-23	6.15601e-10	1.12208e-08	5.74031e-10	2.33376e-09	2.97518e-10	66.391	66.7791	66.7305	66.5149	66.7104	66.6297	0.927369	0.907444	0.803022	0.921307	0.893837	0.927007	12.6726	9.94188	9.03528	7.75184	8.02479	11.5064
A0A1P8AV18	AT1G80000	CASC3/Barentsz eIF4AIII binding protein;Protein MLN51 homolog	0.00020098	0.834535	64992.3	EASDDDEDDEEADDHDK	TRUE	_EAS[Phospho]DDDEDDEEADDHDK_.2	_EAS[Phospho]DDDEDDEEADDHDK_	_EAS[+80]DDDEDDEEADDHDK_	FALSE	2231711	2.48576e+06	2435354	2650652	2.47e+06	2.72748e+06	1.09721	0.100353	0.000200421	7.49643e-14	2.44983e-13	1.90045e-10	6.34766e-08	6.03146e-12	28.2652	27.965	27.332	28.4724	28.1352	27.9082	1	1	1	1	1	1
A0A1P8AV18	AT1G80000	CASC3/Barentsz eIF4AIII binding protein;Protein MLN51 homolog	0.00020098	0.834535	64992.3	REASDDDEDDEEADDHDK	TRUE	_REAS[Phospho]DDDEDDEEADDHDK_.3	_REAS[Phospho]DDDEDDEEADDHDK_	_REAS[+80]DDDEDDEEADDHDK_	FALSE	80475.3	143030	155219	144027	168612	109008	1.11333	0.646497	0.000197328	0.000311227	0.00101414	6.31587e-09	0.000239893	0.00183269	34.2156	33.6793	32.4506	34.841	34.4426	33.5518	1	1	1	1	1	1
A0A1P8AV44	AT1G03610	Plant/protein (DUF789)	0.000166944	0.838151	28083.8	LREESEDGECEGR	TRUE	_LREES[Phospho]EDGEC[Carbamidomethyl]EGR_.2	_LREES[Phospho]EDGEC[Carbamidomethyl]EGR_	_LREES[+80]EDGEC[+57]EGR_	FALSE	195244	129621	144701	457458		84933.7	1.73264	0.476101	0.00936286	0.0019885	0.00600911	0.00692757		0.00273346	34.0891	33.8146	32.9245	34.4995		33.8103	1	1	1	1		1
A0A1P8AVI7	AT1G05860	KAT8 regulatory NSL complex subunit 2	0.000272281	0.822567	25028.2	HPSPIIASTPSK	TRUE	_HPS[Phospho]PIIASTPSK_.2	_HPS[Phospho]PIIASTPSK_	_HPS[+80]PIIASTPSK_	FALSE	241339	494984	566994	533367	579027	587927	1.30461	0.257084	1.39305e-09	1.20547e-09	0.000118598	0.000244806	0.000541155	0.000288428	45.2254	45.0798	45.143	45.3549	45.4664	45.3785	0.998017	0.999997	0.99968	0.999842	0.999955	0.994992	8.31957	14.9893	10.1449	10.8541	12.0999	7.3903
A0A1P8AVN7	AT1G66940	Kinase-like protein;At1g66930	8.22102e-11	0.879288	40082	ESPTLSEDIK	TRUE	_ES[Phospho]PTLSEDIK_.2	_ES[Phospho]PTLSEDIK_	_ES[+80]PTLSEDIK_	FALSE	3.26086e+06	2.90013e+06	2.53482e+06	3698608	3.24315e+06	3.55214e+06	1.20678	0.0737079	9.80856e-15	5.28192e-20	1.40172e-24	1.32587e-17	1.25555e-10	1.14026e-14	52.9801	53.0693	52.8032	52.9394	53.13	53.0444	0.999974	0.999999	0.999998	1	1	1	12.2556	15.3373	14.7429	24.0951	21.7517	19.2775
A0A1P8AVN7	AT1G66940	Kinase-like protein;At1g66930	8.22102e-11	0.879288	40082	PIKESPTLSEDIK	TRUE	_PIKES[Phospho]PTLS[Phospho]EDIK_.2	_PIKES[Phospho]PTLS[Phospho]EDIK_	_PIKES[+80]PTLS[+80]EDIK_	FALSE	1.18083e+06	1.001e+06		1.07893e+06	1.4234e+06	547130	0.931775	0.838823	0.00280795	0.00106635		0.000622265	0.000407864	0.00277464	60.1351	60.3678		60.2	60.5619	60.3405	0.757305	0.955878		0.911593	0.955893	0.8328	4.09662	4.02842		3.23124	4.45778	3.96623
A0A1P8AVN7	AT1G66940	Kinase-like protein;At1g66930	8.22102e-11	0.879288	40082	PIKESPTLSEDIK	TRUE	_PIKES[Phospho]PTLSEDIK_.2	_PIKES[Phospho]PTLSEDIK_	_PIKES[+80]PTLSEDIK_	FALSE	2.17372e+06	2112117	2.59287e+06	2.45495e+06	2.74959e+06	2549504	1.12725	0.169301	4.05655e-07	1.28823e-19	2.99404e-18	5.86146e-11	6.35066e-13	3.52327e-11	58.0874	58.6083	59.0994	58.1986	59.0801	59.29	0.996631	0.999874	0.998431	0.999638	0.999145	0.999998	14.3882	14.6137	14.3016	18.4721	14.6265	15.4695
A0A1P8AVN7	AT1G66940	Kinase-like protein;At1g66930	8.22102e-11	0.879288	40082	SSDALEVPPRPIKESPTLSEDIK	TRUE	_SSDALEVPPRPIKES[Phospho]PTLSEDIK_.3	_SSDALEVPPRPIKES[Phospho]PTLSEDIK_	_SSDALEVPPRPIKES[+80]PTLSEDIK_	FALSE	20842784	12969716	11982262	5009754	25951304	23342344	1.1858	0.712257	0.000202546	0.00049558	6.86235e-06	0.0002358	0.000332117	0.000882039	81.7363	83.3691	85.1632	83.53	83.767	84.9616	0.951652	0.991071	0.99392	0.978012	0.980174	0.997586	14.6834	29.5147	18.9664	17.7297	24.1943	25.6596
A0A1P8AVQ0	AT1G48490	Protein kinase superfamily protein;Probable serine/threonine protein kinase IRE3	0.000245959	0.828288	137420	DSLAAVESPEGMK	TRUE	_DSLAAVES[Phospho]PEGMK_.2	_DSLAAVES[Phospho]PEGMK_	_DSLAAVES[+80]PEGMK_	FALSE	296148	308901	331267		205309	245746	0.722601	0.0229345	1.31945e-08	2.11838e-12	4.29829e-07		6.95254e-07	5.01785e-07	60.9057	61.0775	60.9889		60.9954	61.0657	0.999766	0.994778	0.983612		0.993292	0.957176	9.35776	6.24961	5.09466		5.99769	4.10688
A0A1P8AVQ0	AT1G48490	Protein kinase superfamily protein;Probable serine/threonine protein kinase IRE3	0.000245959	0.828288	137420	SVGSDSPIR	TRUE	_S[Phospho]VGSDSPIR_.2	_S[Phospho]VGSDSPIR_	_S[+80]VGSDSPIR_	FALSE	71923.5		71874.9	75282	53480	88304.1	1.00634	0.974438	0.000205998		0.00213804	0.000201527	0.000667347	0.000186103	42.4214		42.3668	42.5554	42.7585	42.6032	0.978699		0.943926	0.997861	0.771324	0.958719	5.81803		4.51652	7.83864	2.90895	4.99682
A0A1P8AVQ0	AT1G48490	Protein kinase superfamily protein;Probable serine/threonine protein kinase IRE3	0.000245959	0.828288	137420	SSSPSSSNSPR	TRUE	_SSS[Phospho]PSSSNSPR_.2	_SSS[Phospho]PSSSNSPR_	_SSS[+80]PSSSNSPR_	FALSE	65511	58342.8	52339.7	35938.7	55692.5		0.78009	0.240635	5.05044e-06	0.0008716	2.26922e-10	0.000140127	0.000209323		15.076	15.3254	15.1367	15.0764	14.9639		0.781558	0.982596	0.910312	0.96914	0.893894		15.5975	18.9595	15.5135	16.6708	16.1333
A0A1P8AVQ1	AT1G72340	eIF-2B GDP-GTP exchange factor subunit alpha	6.33866e-33	0.93273	35125.1	SPSFILDER	TRUE	_SPS[Phospho]FILDER_.2	_SPS[Phospho]FILDER_	_SPS[+80]FILDER_	FALSE	8293466	7.75447e+06	6814555	9762286	9440826	9278429	1.24578	0.0146441	7.46887e-31	1.36219e-20	5.61833e-29	3.52654e-19	4.08116e-15	9.98897e-16	75.5753	75.9912	76.0557	75.4605	75.8763	76.2235	0.999969	0.999997	1	1	1	1	29.3179	26.5926	28.2589	34.3975	30.2803	33.8774
A0A1P8AVQ1	AT1G72340	eIF-2B GDP-GTP exchange factor subunit alpha	6.33866e-33	0.93273	35125.1	SSNSPPMADTTR	TRUE	_SSNS[Phospho]PPM[Oxidation]ADTTR_.2	_SSNS[Phospho]PPM[Oxidation]ADTTR_	_SSNS[+80]PPM[+16]ADTTR_	FALSE	1.19389e+06	1.73212e+06	1.56365e+06	1.02794e+06	1.49914e+06	1.55184e+06	0.908516	0.584067	5.11164e-38	4.7942e-25	3.70734e-26	3.61712e-14	9.50584e-14	1.38995e-12	26.8986	26.6753	26.5971	27.1184	26.8924	26.7105	0.999985	0.999433	0.999991	0.998764	0.9991	0.999999	43.4688	28.8964	40.2474	39.2435	39.0867	46.4722
A0A1P8AVQ1	AT1G72340	eIF-2B GDP-GTP exchange factor subunit alpha	6.33866e-33	0.93273	35125.1	SSNSPPMADTTR	TRUE	_SSNS[Phospho]PPMADTTR_.2	_SSNS[Phospho]PPMADTTR_	_SSNS[+80]PPMADTTR_	FALSE	1.90971e+06	3.00413e+06	3445841	2.98562e+06	2.74511e+06	2.97065e+06	1.04087	0.817852	2.54691e-38	5.35931e-26	3.53453e-37	2.69743e-20	4.90559e-18	1.07102e-14	35.6859	35.6753	35.2654	35.6961	35.698	35.7464	0.999592	0.999232	0.999934	0.999972	0.999799	0.999931	28.6263	25.7741	33.1738	26.6811	28.3706	32.2971
[truncated: 5,553 more rows]
