# Supplementary material for: Protein Phosphorylation Changes During Systemic Acquired Resistance in Arabidopsis thaliana
Source: Front Plant Sci. 2021 Nov 11;12:748287. doi: 10.3389/fpls.2021.748287 (PMC8632492; doi:10.3389/fpls.2021.748287)
Supplement: Supplementary Table 3 — Identified proteins containing Tyr phosphorylation. [file Table_3.XLSX]

## Sheet: Sheet1
Accession number	Gene name	(phospho) Peptides
A0A1P8B5D8	AT4G38550	IVSENSTPVHHNY[Phospho]QIVAAETYEQDK
O65282	CPN20	Y[Phospho]AGTEVEFNDVK
Q94BR1	MRF1	NDPNYDSGEDAY[Phospho]DGLVDSPVSDPLNDYK
Q9ZNU3	AT2G46630	VLSPY[Phospho]SLPASLLHSER
Q39023	MPK3	PTSENDFM[Oxidation]T[Phospho]EY[Phospho]VVTR
Q9LM33	MPK8	VSFNDAPTAIFWTDY[Phospho]VATR
Q9SLD0	MHK10.1	AS[Phospho]AY[Phospho]VIGK
Q9SZR1	ACA10	DVEAGTSSFTEY[Phospho]EDSPFDIASTK
A0A1I9LRS8	VCS	DC[Carbamidomethyl]Y[Phospho]PSTEGTFIPGESK
A0A1P8BH92	YAK1	TVYSY[Phospho]IQSR
F4HZK3	AT1G15280	YDNDEDGEDSY[Phospho]EDDEEESGGGIDNDK
Q94BT0	SPS1	FSFDGSGNDNY[Phospho]MNQEGSSMDR
F4JL78	AT4G28300	SSVFPTSSY[Phospho]SPPEDSLSQDITDTVER
O64903	NDPK2	ELAEEHY[Phospho]K
P43288	ASK1	GEPNISY[Phospho]IC[Carbamidomethyl]SR
Q39019	ASK10	GEPNVSY[Phospho]IC[Carbamidomethyl]SR
Q96287	ASK8	MLVPGEPNISY[Phospho]IC[Carbamidomethyl]SR
F4JRM5	BIN2	GEANISY[Phospho]IC[Carbamidomethyl]SR
Q93YU8	NRG2	FSPSPAPSSVY[Phospho]PPSTSPSVASSK
Q56ZI2	PATL2	EILQSESFKEEGY[Phospho]LASELQEAEK
Q9FGF4	MSJ1.26	MNTVANY[Phospho]DSDTAAAAAEVPGVASSGK
Q9FMU5	AT5G14050	QIPDY[Phospho]EDDGDDDEELSDEENGQVVAIR
Q8GY60	AT4G03415	SSSDQENETY[Phospho]GNVNTETDAEDEK
Q9M1H3	ABCF4	STSY[Phospho]TDGIDLPPSDEEDD
Q9ZV07	PIP2-6	TKDELTEEESLSGKDY[Phospho]LDPPPVK
Q9ZVI3	AT2G38610	STPEIDSSQY[Phospho]LTELLAEHQK
