# Supplementary material for: Protein Phosphorylation Changes During Systemic Acquired Resistance in Arabidopsis thaliana
Source: Front Plant Sci. 2021 Nov 11;12:748287. doi: 10.3389/fpls.2021.748287 (PMC8632492; doi:10.3389/fpls.2021.748287)
Supplement: Supplementary Table 4 — Proteins containing two or more significantly changed phosphopeptides. [file Table_4.XLSX]

## Sheet: Sheet1
Accession number in uniprot	Accession number in Tair	EG.PrecursorId	SL-CK-1	SL-CK-2	SL-CK-3	SL-V-1	SL-V-2	SL-V-3	FC SL-V/SL-CK	P value
Q9SAH7	AT1G80840	_DQIS[Phospho]PPK_.2	173481	524818	583861	31235.8	32560.1	68211.6	0.102957	0.040749
Q9SGI8	AT3G01830	_M[Oxidation]LS[Phospho]LLGESK_.2	582742	519704	402426	121044		81497	0.201886	0.0105139
Q9SGI8	AT3G01830	_MLS[Phospho]LLGESK_.2	511401	448542	247703	110147	87576	73095.1	0.224253	0.0176702
Q8VZC7	AT5G45510	_S[Phospho]LPAAINVLAK_.2	54912.1	48477.3	35545.1		7304.67	13880.5	0.228725	0.0192088
Q39204	AT1G32640	_S[Phospho]GEILNFGDEGK_.2	171112	96614.5	91505.8	17231.6	51219.8	21614.8	0.250718	0.032241
Q9SS47	AT3G10360	_NRT[Phospho]PDSHLVGR_.3	2448639	1.98052e+06		1112459	376285	237407	0.259816	0.0248419
Q9SAH7	AT1G80840	_DQIS[Phospho]PPKK_.2	1.04827e+06	1.14648e+06	1.27148e+06	318437	327265	356430	0.289113	0.000234126
O48549	AT4G31700	_SRLS[Phospho]SAAAK_.2	48787780	46985704	74917944	16058935	18781614	20844236	0.326231	0.0137144
P93758	AT2G41870	_S[Phospho]PDATSNDR_.2	35337.8	26934.9	28203.3	10004.9	9781.69		0.328042	0.00927136
A9LNK9	AT1G30460	_NEES[Phospho]ESEDEDEAPR_.2	91732.9	126234	145686	34575.5	40221.1	45029.3	0.329506	0.00718036
Q9SA55	AT1G03140	_EDELS[Phospho]GGES[Phospho]S[Phospho]DVDADKDM[Oxidation]K_.2	726062	607576	848786	239448	245074		0.333016	0.0124746
F4JKH6	AT4G28080	_M[Oxidation]FVKS[Phospho]PLNK_.2	698856	795096	913756	388068	344434	94568.7	0.343509	0.00886756
Q9LM76	AT1G20780	_VGS[Phospho]S[Phospho]DGDQSDDSSHFER_.2	79687.2	103799	119886	50555.2		20531.8	0.351484	0.039697
Q8LGA5	AT5G27420	_SNS[Phospho]VFVLPR_.2	1.28409e+06	1325272	1.34121e+06	313922	496920	596844	0.356325	0.000557015
Q6NLQ6	AT3G57530	_FNSIS[Phospho]LK_.2	2.72077e+06	6256982	5966876	1.95295e+06	1.86155e+06	1.60519e+06	0.362651	0.049345
F4HRT5	AT1G67230	_AES[Phospho]ETGTK_.2	6055068	6.25084e+06	8.0493e+06	1039137	3.53408e+06	2.88244e+06	0.366278	0.011816
F4KGU2	AT5G10360	_LS[Phospho]SAPAKPVAA_.2	12325085	15639604	17583410	5128640	5766472	5896707	0.368661	0.00350153
Q9SUY2	AT3G52230	_DDDEDDQS[Phospho]S[Phospho]DGHED_.2	2.6122e+06	2.47041e+06	2739999	742563	701075	1.44303e+06	0.369016	0.00288385
O48549	AT4G31700	_LS[Phospho]SAAAKPSVTA_.2	1.00298e+06	1.26828e+06	1.53716e+06	453399	547388	496752	0.393217	0.00793219
Q39204	AT1G32640	_VLS[Phospho]FGDK_.2	400158	417758		175222	153071		0.401377	0.0033222
A0A1P8ANH8	AT1G66880	_S[Phospho]PDVVDIEC[Carbamidomethyl]GGGDDVGLLR_.2	1.59349e+06	1.19347e+06	1.19706e+06	720033	496097	422136	0.411209	0.00814297
O23231	AT4G36500	_STS[Phospho]VPYYAPSIK_.2	18460882	15339437	16573064	6822332	7.0569e+06	6902776	0.412559	0.000411506
Q9FFF6	AT5G05600	_SHVESHIS[Phospho]PR_.3	12468314	10961579	8181030	7.77534e+06	3.46125e+06	1.82395e+06	0.413165	0.0466813
F4JLK2	AT4G10120	_NDAEEDLLS[Phospho]ELS[Phospho]EGEK_.3	196205	172020	230483	107412	54462	85999.9	0.414015	0.00694362
F4KGU2	AT5G10360	_SRLS[Phospho]SAPAKPVAA_.2	57334328	53133304	59850276	25103006	23235070	23844718	0.423812	8.75901e-05
O23231	AT4G36500	_STS[Phospho]VPYYAPS[Phospho]IK_.2	3.05869e+06	2.8347e+06	2.98306e+06	1.5672e+06	1.16143e+06	1.12222e+06	0.433828	0.000433958
Q9FKL3	AT5G57610	_T[Phospho]LVS[Phospho]GGVR_.2	71659.3	61809.7	107780	33133.8	36461.9	38907.4	0.449756	0.0347133
A0A1P8B475	AT4G27870	_ESIVPVVNPS[Phospho]R_.2	1.2062e+06	914196	905912	618199	372393	401150	0.459881	0.0122655
Q8L9M8	AT1G33810	_NLS[Phospho]FFTR_.2	181817	150198	142102	74977.3	75063	69250.9	0.462526	0.00228403
Q8L3R2	AT3G50770	_LNLS[Phospho]FQNR_.2	19179472	16975176	16147674	8778622	8117596	7706136	0.470387	0.000645991
Q8LGA5	AT5G27420	_GNSVTS[Phospho]PSGDSVR_.2	291609	330307	369526	181147	120324	166034	0.471541	0.0038237
Q8VZC7	AT5G45510	_S[Phospho]ADKEEPESQAR_.2		248046	286491	114666	141934		0.480041	0.0275744
Q9XIE2	AT1G59870	_DSAAEAS[Phospho]GGAGNK_.2	1512446	1.74932e+06	1.92599e+06	828644	859087	880466	0.49505	0.00193967
Q9SUY2	AT3G52230	_EATGDDDQKDDDEDDQSS[Phospho]DGHED_.3	2.94842e+06	3.78405e+06	4486986	1.58335e+06	1641919	2.34019e+06	0.496054	0.0204979
Q9XIE2	AT1G59870	_DSAAEAS[Phospho]GGAGNKK_.2	1.19181e+06	1.12552e+06	1.23605e+06	551616	634103	612837	0.506154	0.000134035
Q9XIE2	AT1G59870	_TQS[Phospho]VNDDEEALK_.2	16223426	16563420	16875550	8.15733e+06	8351405	8663266	0.506862	4.39143e-06
Q9SMM5	AT3G48740	_RAEIEDGQT[Phospho]PK_.2	9292253	10470535	14710732	6.06573e+06	5558071	6.00094e+06	0.511254	0.0273392
Q9SZR1	AT4G29900	_QAALVLNAS[Phospho]R_.2	1.99318e+06	1.7133e+06	1.77918e+06	994400	920310	931283	0.518806	0.000551886
Q9SCK9	AT3G49490	_SLNSMDVDS[Phospho]DS[Phospho]ENDQPQK_.2	209232	153018	237624	79079.2	117804	116125	0.52179	0.026564
Q8S8I5	AT2G27285	_SKS[Phospho]LEPLEAEQAVSEK_.3	2269378	2370808	2210841	1.16026e+06	1.14176e+06	1.27683e+06	0.522382	6.5384e-05
A0A1P8B5D8	AT4G38550	_S[Phospho]NAS[Phospho]PFHPFR_.2	1.2719e+06	1.11545e+06	878199	658050	632569	436505	0.528893	0.0187361
Q8L3R2	AT3G50770	_SNSS[Phospho]S[Phospho]TLNS[Phospho]PR_.2	635404	850311	1.00793e+06	384087	474031	461481	0.529184	0.0247213
P56757	ATCG00120	_GKIS[Phospho]ASESR_.2	333788	526744	594246	259554	245766	265924	0.530146	0.0436295
F4JLK2	AT4G10120	_NDAEEDLLSELS[Phospho]EGEKDK_.3	4068796	3.57474e+06	3.10095e+06	2.17549e+06	2.109e+06	1.42043e+06	0.530962	0.0104205
Q9SA55	AT1G03140	_EDELS[Phospho]GGES[Phospho]S[Phospho]DVDADK_.2	1602951	1.60427e+06	1.80624e+06	847743	935124	887394	0.532619	0.000412259
Q9SMM5	AT3G48740	_LGTVSS[Phospho]PEPISVVR_.2	135671888	135629120	124958608	72810560	66557704	74735816	0.540313	0.000150787
Q9LQI8	AT1G17360	_ES[Phospho]PPGFNDELK_.2	1.15353e+06	1.11154e+06	903559	572957	629678	514880	0.542038	0.0045286
O23177	AT4G37090	_AES[Phospho]DS[Phospho]EEEEIIDELPR_.3	1.00393e+06	1.09008e+06	1.19157e+06	615993	603482	570034	0.544656	0.000874968
Q9M1X3	AT3G63160	_DKS[Phospho]DS[Phospho]DDATVPPPSGA_.2	3.97775e+06	4.50855e+06	5.05373e+06	2.32361e+06	2525606	2616620	0.55139	0.00328473
Q9SMM5	AT3G48740	_LGTVS[Phospho]S[Phospho]PEPISVVR_.2	1.68676e+06	2.15668e+06	1.43715e+06	892742	1060532	958396	0.551392	0.0218258
Q8L3R2	AT3G50770	_SNSSS[Phospho]TLNS[Phospho]PR_.2	563810		655712	297707	336317	375933	0.552105	0.00896599
Q9LM76	AT1G20780	_VGS[Phospho]S[Phospho]DGDQS[Phospho]DDSSHFER_.2	527713	562520	662335	332050	283707	355864	0.554399	0.0046514
Q39204	AT1G32640	_SSS[Phospho]PPFSTPADQEYR_.2	1.99058e+06	2.05379e+06	2.06695e+06	1.2322e+06	1.12806e+06	1.03244e+06	0.555151	0.000130029
Q8LLD0	AT1G80680	_FGLS[Phospho]DDEAEDIAM[Oxidation]DDAPGLGDPVGLDGK_.3	1.97677e+06	1.58077e+06	1.78046e+06	1.08451e+06	978162	903633	0.555696	0.00327365
O65655	AT4G39680	_SDSSVS[Phospho]EDGPK_.2	7.1689e+06	8854506	9775661	4153816	4898214	5.31007e+06	0.556691	0.0102884
Q9XIE2	AT1G59870	_NIEDIFSSGS[Phospho]R_.2	25400510	20289128	17554460	13432755	11425605	10446290	0.558228	0.0193797
Q9FDZ5	AT1G34020	_LGAAS[Phospho]DS[Phospho]DDNEDK_.2	689175	770903	794729	428511	400017	432861	0.559422	0.000593309
Q9S7P9	AT5G61210	_SSKPNPFDS[Phospho]DDESDNK_.3	14073969	12877119	13384672	8.08433e+06	7938048	6694823	0.563203	0.000470255
A0A1P8ANH8	AT1G66880	_SLPITSYS[Phospho]SR_.2	862105	724073	632145	431089	436776	390069	0.567066	0.00945915
F4HRT5	AT1G67230	_EVEVTNVNS[Phospho]DGDQSDINSK_.2	2.86241e+06	2.78493e+06	3.01974e+06	1.52204e+06		1.77168e+06	0.57004	0.00237059
Q9M2Z4	AT3G48890	_KDVAT[Phospho]DDDDAAK_.2	1.02053e+06	1.26936e+06	1.40225e+06	512916	756116	836946	0.570394	0.0234842
Q9LD43	AT2G38040	_ELAAEES[Phospho]DGS[Phospho]VKEDDDDDEDSSESGK_.3	9693198	11740383	13555424	6816247	6281498	6.87136e+06	0.570725	0.0114631
Q9S7P9	AT5G61210	_PNPFDS[Phospho]DDESDNK_.2	6559697	6.62928e+06	7040441	3.86643e+06	3.8066e+06	3.97425e+06	0.57576	5.44671e-05
Q9SZR1	AT4G29900	_DVEAGTSSFTEY[Phospho]EDSPFDIASTK_.3	2.09344e+06	1.92084e+06	1.89344e+06	1.03502e+06		1.24849e+06	0.579795	0.00531453
Q8LG05	AT4G00238	_VKDES[Phospho]VLVK_.2	536758	604206	525599	379403	359276	229711	0.58107	0.0117297
Q9M1X3	AT3G63160	_DKSDS[Phospho]DDATVPPPSGA_.2	40308892	47445976	50926472	25173784	27214796	28205558	0.581146	0.00398452
Q9FY54	AT5G11110	_VEFENS[Phospho]DS[Phospho]DS[Phospho]PSDS[Phospho]LR_.2	602736		653895	322875	449825	326354	0.583069	0.0195159
F4K956	AT5G56980	_S[Phospho]INM[Oxidation]SYFK_.2	343748	412693	315836	276494	190081	162511	0.586682	0.03001
F4HRT5	AT1G67230	_EVEVTNVNS[Phospho]DGDQS[Phospho]DINSK_.2	8932487	8311471	8729968	4736037	5319998	5247749	0.589198	0.000163559
O23177	AT4G37090	_AES[Phospho]DS[Phospho]EEEEIIDELPR_.2	3.35125e+06	3.60005e+06	3700956	2.05567e+06	2.37323e+06	1854201	0.589838	0.0013607
O23052	AT1G05150	_ELGPSSEIS[Phospho]EK_.2	386932	259991	333061	203738	194074	182363	0.592025	0.0233145
Q9S814	AT5G03280	_SLSGEGGS[Phospho]GTGS[Phospho]LSR_.2		5922945	6.13767e+06	3.45079e+06	3.7186e+06		0.594447	0.00488901
Q9FKA5	AT5G39570	_S[Phospho]DDQVESYIK_.2	1.16418e+06	1.27581e+06	1.15845e+06	618188	855649	668053	0.595227	0.00403295
Q9SGN6	AT1G28380	_S[Phospho]GVFSM[Oxidation]ISTR_.2	277335	246324	240027	153399	160896	140890	0.596035	0.00135109
Q9SGZ8	AT1G78020	_LLS[Phospho]MVTPR_.2	424356	329400	290618	228070	234279	160868	0.596737	0.0383494
Q9FFF6	AT5G05600	_ETYSNS[Phospho]PR_.2	4.15797e+06	5.62933e+06	5832103	2.76308e+06	3.20181e+06	3356914	0.596809	0.0195879
Q9M2Z4	AT3G48890	_DVAT[Phospho]DDDDAAK_.2	1.23245e+06	1.44654e+06	1.54596e+06	795010	872639	855024	0.59709	0.00401442
Q9M2D8	AT3G61260	_PAS[Phospho]ASLDR_.2	246087	263715		153086	151597		0.597649	0.00735588
Q38858	AT1G09210	_DAPAESDAEDEPEDDEGGDDS[Phospho]DSESK_.3	502057	793421	720297	390859	448987	372121	0.601241	0.0415629
A0A1P8B475	AT4G27870	_DT[Phospho]PDTSTADFGLTK_.2	344896	339757	327822	182173	213172	214535	0.602366	0.000331464
P0C5E2	AT1G18390	_S[Phospho]GPLVAQSPDSVIVK_.2	1.58414e+06	1560385	1.46817e+06	973849	931689	877615	0.603367	0.000171869
Q8L3R2	AT3G50770	_S[Phospho]NS[Phospho]DDNNNIK_.2	145468	152319	204937	88485.9	103594	111569	0.604006	0.0292888
Q9S7P9	AT5G61210	_SSKPNPFDS[Phospho]DDESDNK_.2	23835268	21585242	22145586	14893451	13378365	12550882	0.604189	0.000757815
Q9XIE2	AT1G59870	_DS[Phospho]AAEASGGAGNK_.2	125375	91543	99743.3	47422.7	71115.7	73278.5	0.605748	0.0338798
Q9SGZ8	AT1G78020	_TTS[Phospho]LSEIK_.2	26588792	27209016	27293900	16168433	16766101	16316539	0.60735	3.13968e-06
F4JEL4	AT3G13920	_[Acetyl (Protein N-term)]AGS[Phospho]APEGTQFDAR_.2	2.33597e+06	2386039	2.68878e+06	1.43274e+06	1.50185e+06	1.57518e+06	0.608542	0.00119364
Q93YP9	AT1G19450	_QSS[Phospho]MLESSQVIR_.2	439613	440562	407760	292832	233225		0.612675	0.00792368
Q42438	AT5G19450	_EGS[Phospho]LQLEGEN_.2	2.79345e+06	2.91204e+06	2.79703e+06	1.55864e+06	1.9376e+06	1.72751e+06	0.614377	0.000715107
F4K956	AT5G56980	_APS[Phospho]IIDR_.2	3.20109e+06	3516129	3.65091e+06	2.08798e+06	2.04916e+06	2.26028e+06	0.617028	0.000869943
Q9C8K2	AT1G51500	_VPSLS[Phospho]SLSSR_.2	499719		429228		272498	301087	0.617458	0.0428942
Q9FRL3	AT1G75220	_QSSMMGS[Phospho]S[Phospho]QVIR_.2	550041	663476	508308	362553	380925	324654	0.620349	0.0114573
Q9LE22	AT1G18210	_AM[Oxidation]GTS[Phospho]YTETELNR_.2	3.22978e+06	3111279	3.13233e+06	1.66569e+06	2.06732e+06	2.15309e+06	0.62133	0.0015048
Q8S8I5	AT2G27285	_S[Phospho]LEPLEAEQAVSEK_.2	1.21268e+06	1.12091e+06	1.27883e+06	704094	765813	781068	0.62312	0.000913741
A0A1P8B5D8	AT4G38550	_SNAS[Phospho]PFHPFR_.2	3672448	5030079	4.13582e+06	3.10171e+06	2636255	2.28055e+06	0.624575	0.0257555
Q9SGN6	AT1G28380	_IDINS[Phospho]AVYPR_.2	1826656	1.6496e+06	1.63007e+06	1.10115e+06	1.0477e+06	1.04692e+06	0.625844	0.00061016
Q56WH4	AT5G22650	_GM[Oxidation]DVDEDDS[Phospho]DDDEEEDS[Phospho]EDEEEEETPK_.3	3.25368e+06	3.76317e+06	4.04507e+06	2.24106e+06	2.29634e+06	2462566	0.632799	0.00493064
A0A1P8B5D8	AT4G38550	_NSSPPS[Phospho]PFHPAAYK_.3	6.74571e+06	6376137	6.95852e+06	4.41006e+06	3921516	4.38312e+06	0.63319	0.000455405
Q9FHK4	AT5G05190	_EIVS[Phospho]DVEDHQR_.2	1333461	1.35625e+06	1.25708e+06	803269	988537	710386	0.63398	0.00522619
Q9SD79	AT5G08050	_SGFSLST[Phospho]IER_.2	8672167	8535865	7663505	5.32882e+06	5330627	5.15816e+06	0.635972	0.000714084
Q9LE22	AT1G18210	_AMGTS[Phospho]YTETELNR_.2	4801658	4.11653e+06	4.30846e+06	2678397	2.98649e+06	2.76462e+06	0.637312	0.00202778
Q9LD43	AT2G38040	_ELAAEES[Phospho]DGS[Phospho]VK_.2	1.22527e+06	1.28821e+06	1.76956e+06	887749	988807	862179	0.639437	0.0431768
B3H497	AT3G06330	_VPT[Phospho]PNQQNNR_.2	567385	678006	801559	353080	447332	508509	0.639449	0.0390077
Q9FKL3	AT5G57610	_LGS[Phospho]GDGFTR_.2	278976	273262	288866	174304	178465	187875	0.64278	7.91896e-05
Q9S814	AT5G03280	_AAPTSNFTVGSDGPPS[Phospho]FR_.2	19653942	19254462	17877094	12458789	12538905	11669609	0.645716	0.000377943
Q9FDZ5	AT1G34020	_LGAAS[Phospho]DS[Phospho]DDNEDKA_.2	8422751	8855314	10583133	5.61116e+06	5793798	6.76209e+06	0.652055	0.0125825
Q9SMM5	AT3G48740	_AEIEDGQT[Phospho]PK_.2	7.5695e+06	8495088	9721114	4874447	5.82585e+06	6.12478e+06	0.652496	0.0148379
P0C5E2	AT1G18390	_S[Phospho]GPLVAQS[Phospho]PDSVIVK_.2	180728		180026	111606		124206	0.653664	0.0100481
Q8L9M8	AT1G33810	_GDDEDDS[Phospho]DKFSNAK_.2	1573900	1.73417e+06	2.304e+06	1.27561e+06	1.1559e+06	1.2693e+06	0.659436	0.0472297
Q56ZI2	AT1G22530	_TFGSIITS[Phospho]PR_.2	3.78665e+06	3.69414e+06	3.72603e+06	2.4904e+06	2.40175e+06	2500329	0.659641	6.72959e-06
Q9SHC8	AT2G45140	_EGS[Phospho]EEGSSPR_.2	665491	738015	803424	439199	503512	515061	0.660543	0.0057173
Q9SD79	AT5G08050	_SGFS[Phospho]LSTIER_.2	536536	569958	400492	328130	365686	305575	0.663172	0.0364799
Q9C977	AT1G80270	_S[Phospho]DQEEDDLEDGFS[Phospho]ELEGSK_.2	4.37448e+06	3736990	3.99493e+06	2.05888e+06	2.89297e+06	3.08581e+06	0.663918	0.02064
O23177	AT4G37090	_DRDS[Phospho]DS[Phospho]DAPEELTQEQAK_.2	2.48145e+06	2.22082e+06	2.13094e+06	1.5764e+06	1.49539e+06	1.46547e+06	0.664001	0.00225873
Q9LD43	AT2G38040	_ELAAEES[Phospho]DGSVK_.2	10366626	11893657	14028921	7361405	8.36598e+06	8407306	0.665065	0.0221368
Q8S3U9	AT1G76850	_GS[Phospho]EDTVSDDK_.2	475787	497550	594536	295484	381365	367728	0.666238	0.0181506
Q9C9Q4	AT1G75100	_VNESSS[Phospho]LPGS[Phospho]R_.2	3.60751e+06	3.87887e+06	4.29926e+06	5314261	6.227e+06	6137204	1.5	0.00512611
Q93ZH7	AT5G03040	_DDES[Phospho]LAGSPALPSYM[Oxidation]VPTK_.2	4278028	4.30989e+06	3.97939e+06	6644924	6.19706e+06	6018663	1.50077	0.000606632
F4JUM8	AT4G14200	_TTS[Phospho]WGTAK_.2	608643	761277	984668	1.2275e+06	1.13826e+06	1.17675e+06	1.50451	0.0242513
F4HRE0	AT1G45688	_RPVYYVQS[Phospho]PSR_.2	9231569	10369647	10523892	16793836		13454211	1.50612	0.0328615
Q9SS47	AT3G10360	_T[Phospho]PDSHLVGR_.2	239568	267463	329982	449807	456819	354159	1.50629	0.0293968
Q9SZP8	AT4G38710	_GS[Phospho]FESLSR_.2	408553	406403	439706	583908	668639	642656	1.51053	0.00143758
F4IEK8	AT1G52780	_VMS[Phospho]ESEMVSGAR_.2	623300	649783	641388	1.02862e+06	928560	935951	1.51119	0.00059641
Q940P1	AT3G09760	_NASLTSS[Phospho]PVAK_.2	396646	468009	362551	571697	670752	616311	1.51463	0.00758771
Q9LZ71	AT5G04550	_S[Phospho]GPLIGM[Oxidation]GK_.2	106165	173181	184235	234989	233829	233592	1.51518	0.0309802
A0A1I9LS11	AT3G09600	_VIS[Phospho]PQHELATLR_.2	2.30304e+06	2.2905e+06	1.41904e+06	3.04868e+06	3.18603e+06	2.88735e+06	1.51716	0.0273372
Q9SCQ6	AT3G50700	_T[Phospho]PPEIVQEAPK_.2	87960	66890.8	76350.8		113478	121000	1.52126	0.0171024
O48847	AT2G32700	_DGQQNANDGSIGS[Phospho]PMQSSSSK_.2	388612	647285	703578	808861	911644	927152	1.5221	0.0434435
Q9FVQ1	AT1G48920	_PAFT[Phospho]PQSGNFR_.2	548641	493055	532525	810159	781147	818807	1.53099	0.000155724
Q8L778	AT5G09870	_SGLESETFS[Phospho]R_.2	3.70289e+06	3.83253e+06	3585954	5593742	5590699	5.90396e+06	1.53654	9.40194e-05
A0A1P8B0X3	AT2G34680	_EDNAT[Phospho]IANESR_.2	306532	328671	303152	451468	520585	470744	1.53758	0.00159951
A0A1I9LMT6	AT3G12640	_ISHSTGSETLDQNMVLGEVS[Phospho]PK_.3	968337	1.23232e+06	1.12914e+06	1.75829e+06	1.85363e+06	1.50817e+06	1.53766	0.00970265
Q9SAD7	AT1G13020	_ADTEVSET[Phospho]PTAVK_.2		756006	853118	1.17409e+06	1253515	1.29692e+06	1.54308	0.0050596
Q9FXI5	AT1G19870	_FEELTSSTGS[Phospho]NK_.2	683786	763904	789982	1.0972e+06	1.12958e+06	1.22632e+06	1.54316	0.00128559
A0A1P8AUP4	AT1G27430	_S[Phospho]PTPVPM[Oxidation]GNPSDPNPK_.2		446239	544928	784861	768750	748071	1.54813	0.00619045
Q9FZ45	AT1G16860	_SGPIPGAPS[Phospho]R_.2	8073321	6492179	9126086	11816946	12535320	12346192	1.54901	0.00549446
Q38858	AT1G09210	_S[Phospho]VDSEETSEK_.2	105602	107597	95462.4	146084	170653	168073	1.57069	0.00246276
A0A1P8B0X3	AT2G34680	_VSS[Phospho]PSAGSSPSVSSSIR_.2	2.95156e+06	3.01189e+06	3224298	4.69254e+06		4.9525e+06	1.57466	0.00118385
Q9C6N3	AT1G27850	_LLS[Phospho]PGSAPR_.2	1.59453e+06	1770704	1.4141e+06	2.42212e+06	2.75896e+06	2.38807e+06	1.58373	0.00405787
O49595	AT3G51880	_S[Phospho]EINDEDEAS[Phospho]GEEELLEK_.2	1.3102e+06	1.05601e+06	1.05333e+06	1748687	1817466	1850243	1.58396	0.00180387
A0A1I9LMT6	AT3G12640	_S[Phospho]VVSTSTQNSSDPDPAR_.2	86336.6	78709.5	108810	143222	128824	162310	1.58607	0.01565
Q56ZI2	AT1G22530	_EILQSES[Phospho]FK_.2	861525	760448	851514	1.34297e+06	1.4153e+06	1.18599e+06	1.59462	0.00282055
Q8LG05	AT4G00238	_QS[Phospho]FVLTR_.2	32672.1	40691.3	35550.9		64404.1	52156.2	1.6053	0.0277911
P10797	AT5G38420	_SSAS[Phospho]FPVTR_.2	502039	478097	518346	784663	814879	808259	1.60683	3.40774e-05
F4HRE0	AT1G45688	_FS[Phospho]GSLKPGSR_.2		1.76462e+06	2.00305e+06	3.1676e+06	2.75868e+06	3.17157e+06	1.60981	0.0101751
Q9SX98	AT1G47670	_VST[Phospho]PEILT[Phospho]PSGQR_.2	1.18562e+06	1.38827e+06	1.27284e+06	1.73474e+06	2507597	2.00981e+06	1.62531	0.0265004
B3H4F6	AT2G43680	_PTT[Phospho]PRPPSPLADAPR_.3	908721	871686	1.06523e+06	1.51307e+06	1.46688e+06	1.64525e+06	1.62537	0.00175218
A0A1I9LRS8	AT3G13300	_DC[Carbamidomethyl]Y[Phospho]PSTEGTFIPGESK_.2	1.28308e+06	1.17215e+06	1250342	2.05424e+06	1.98566e+06	1.98521e+06	1.62596	4.26814e-05
B9DHK3	AT5G14540	_PLPQGLPMASAISSGGSGGGSDS[Phospho]PR_.3	5.84298e+06	5187178	3.99884e+06	8007989	8390833	8.05843e+06	1.62734	0.00472958
A8MRH7	AT3G06820	_SM[Oxidation]S[Phospho]LVLANK_.2	128916	122291	173619	241953	209160	241248	1.62975	0.010075
Q0WUY5	AT3G07660	_SGPDSDGRVS[Phospho]PFVSPGVASK_.3	2.21666e+06	2.16828e+06	2.07087e+06	3.50005e+06	3.67569e+06	3356014	1.63136	0.000182884
Q9C9Q4	AT1G75100	_ETVSSS[Phospho]PLS[Phospho]R_.2		237675	281863	399339	453309	420049	1.63311	0.00810585
O65655	AT4G39680	_VPEAQITNSATPTTT[Phospho]PR_.2	12016367	12153132	12046543	19305038	20030814	19908372	1.63586	4.65297e-06
Q9SAD7	AT1G13020	_KADTEVSET[Phospho]PTAVK_.2	781708	888202	1.04916e+06	1.55098e+06	1.42307e+06	1.49056e+06	1.64196	0.00249741
A0A1I9LTA1	AT3G48060	_SMNS[Phospho]PTTSQPK_.2	175661	322776	316254	401713	488560	449406	1.6444	0.031945
Q0WUY5	AT3G07660	_VS[Phospho]PFVSPGVASK_.2	899027	887914	964289	1.53932e+06	1.46541e+06	1.53145e+06	1.64878	5.84707e-05
Q8L603	AT4G20300	_VS[Phospho]PDC[Carbamidomethyl]LPLTNGGK_.2	391217	415059	264183	569604	616845	585790	1.65559	0.00871077
B3H4F6	AT2G43680	_TLS[Phospho]PKPPS[Phospho]PR_.2	1.91983e+06	2379539	2.8462e+06	3955112	4115336	3764285	1.65623	0.00545314
O48847	AT2G32700	_TEVNLGTS[Phospho]PR_.2	7177551	7545760	7778898	12222353	12237670	12905987	1.66055	6.45906e-05
F4IA48	AT1G78150	_EITGS[Phospho]GIFSR_.2	467004	504094	464963	790733	801033		1.66264	0.000327867
Q93ZH7	AT5G03040	_DDES[Phospho]LAGSPALPSYMVPTK_.2	7501467	7.16025e+06	6169276	11515729	11851476	11380527	1.66808	0.000394031
Q9FHZ3	AT5G53830	_LGLNS[Phospho]PVTPLR_.2	354573	357444	260450	583756	547046	497904	1.67482	0.00564773
F4K5Y4	AT5G43310	_LET[Phospho]LSDLVTETPK_.2	227750	215780	242348	360128	410774	380382	1.67855	0.000730274
A0A2H1ZEH5	AT3G04630	_S[Phospho]FSDAVSSSSR_.2	850712	872454	945305	1.48785e+06	1.47616e+06	1.51703e+06	1.67925	4.12799e-05
A0A1I9LRS8	AT3G13300	_VFC[Carbamidomethyl]SQVS[Phospho]NLS[Phospho]TEMAR_.2		726420	758818	1270078		1.24687e+06	1.69465	0.00148863
B3H4F6	AT2G43680	_LDAPRPTT[Phospho]PKPPS[Phospho]PR_.3		3474766	3273023	5774032	6455713	4.9232e+06	1.69467	0.0269277
Q8RWY7	AT4G32420	_S[Phospho]PIQLSR_.2	327841	412997	410958	682366	600331	670275	1.69559	0.00215049
F4HYR4	AT1G62330	_VQDLIHGGGGAS[Phospho]PVQS[Phospho]PTR_.2	732441		595141	1.04978e+06	1.08692e+06	1.24219e+06	1.69676	0.0150228
A8MRH7	AT3G06820	_SMS[Phospho]LVLANK_.2	177914	117616	152587	309378	224770	228559	1.70203	0.0325771
F4J9M5	AT3G06010	_AVES[Phospho]GEDLSK_.2		448439	468371		786353	774181	1.70213	0.00131365
A0A1I9LRS8	AT3G13300	_TLSYPTPPLNLQS[Phospho]PR_.2	23123204	20847798	17241474	34261008	35229248	35072492	1.70819	0.00114422
F4K703	AT5G21160	_S[Phospho]ITS[Phospho]GDNFGNPSK_.2	1.05346e+06	1.4207e+06		1.94896e+06	2.25379e+06	2.1489e+06	1.71146	0.016124
Q940P1	AT3G09760	_NAS[Phospho]LTSS[Phospho]PVAK_.2	289587	394802	445759	646020	596486	694793	1.7142	0.00760104
Q9FKL6	AT5G57580	_VVS[Phospho]EELER_.2	121991	133806	179658	237849	265559	249883	1.72989	0.00539591
Q93W28	AT4G15545	_PTPNDDDTPFQPS[Phospho]R_.2	8896857	8863109	8436325	15158105	14842809	15516121	1.73754	1.23512e-05
Q9SHI0	AT1G17210	_ADS[Phospho]VEGT[Phospho]VVDR_.2	290597	308646	367034	527390	576310	575318	1.73762	0.00108027
Q9FZ45	AT1G16860	_KS[Phospho]GPIPGAPSR_.2	557007	551598	595565	1.0589e+06	975084	933075	1.74106	0.000438576
Q9SX98	AT1G47670	_VST[Phospho]PEILTPSGQR_.2	357502	430888	413840	661518		734161	1.74136	0.00483546
B9DFN3	AT1G70100	_FSSFS[Phospho]PNK_.2	1150473	1045208	1.15383e+06	1.83985e+06	1.9704e+06	2.0683e+06	1.75505	0.000359995
O48946	AT4G32410	_NAISS[Phospho]PYIDPR_.2	2.78083e+06	3.12093e+06		5155130	5.46056e+06	4936198	1.75675	0.00243043
B3H4F6	AT2G43680	_LDAARPTT[Phospho]PRPPS[Phospho]PLADAPR_.3	1.3925e+06	1.44134e+06	1337235	2.60865e+06	2.43705e+06	2316288	1.76501	0.000293361
F4IEK8	AT1G52780	_VM[Oxidation]S[Phospho]ESEMVSGAR_.2	379244	427493	529882	861203	723503	775219	1.76559	0.00469127
O48683	AT1G24160	_SLHIS[Phospho]M[Oxidation]NLDPPASDPTALPSTR_.3	1.09747e+06		1.09229e+06	1943346	1.87232e+06	1.98428e+06	1.76578	0.000280053
F4JUM8	AT4G14200	_EVS[Phospho]EEWNS[Phospho]PAK_.2	226076	202060	205356	374153	396297	354346	1.77555	0.000328011
A0A2H1ZEJ0	AT3G45850	_MDS[Phospho]IQQR_.2	442441	451349	694216	846418	962079	1.01574e+06	1.77848	0.0129164
Q9LQI8	AT1G17360	_EDIPS[Phospho]PVM[Oxidation]PR_.2	182283	159328		366432	291224	259418	1.7897	0.0484544
Q9FMD7	AT5G16590	_S[Phospho]IEAAPVPTSSAAVAK_.2	160208	214864	165626	273043	326156	372341	1.79683	0.0128353
O65655	AT4G39680	_SDS[Phospho]SVS[Phospho]EDGPK_.2	1.46359e+06	1.84635e+06	1.8461e+06	2.75118e+06	3.15461e+06	3.59614e+06	1.84287	0.00624792
B3H4F6	AT2G43680	_VQS[Phospho]QIQSR_.2	26681	36825.1		53205.5	64958.6	59388.8	1.86389	0.017809
Q9SUA1	AT4G26630	_EEGTLVDEDKGT[Phospho]DMDEK_.2	1.24552e+06	1.04429e+06	1.02939e+06	2.6633e+06	1.67804e+06	1.8723e+06	1.87203	0.0355354
B3H4F6	AT2G43680	_VMGT[Phospho]PVS[Phospho]EK_.2	38276.3	75235.7	93608.1	145498	125396	117013	1.87285	0.0303075
O48946	AT4G32410	_TPDTQS[Phospho]VR_.2	470666	583284		1.11485e+06	831570	1.0198e+06	1.87626	0.0279603
Q9SIN1	AT2G42580	_ELDLGS[Phospho]PVSTLM[Oxidation]PR_.2	985820	829496	517550	1.50708e+06	1379361	1.50242e+06	1.88132	0.00887901
Q9C9X0	AT1G68060	_GPGNYS[Phospho]FNK_.2	3801486	3.79062e+06	4.17426e+06	7.4324e+06	7052497	7673693	1.88321	9.57921e-05
Q9C5S1	AT3G55270	_C[Carbamidomethyl]PAAPLT[Phospho]PR_.2	2.55961e+06	2.81322e+06	2.12274e+06	5.93989e+06	4217854	3.99238e+06	1.8878	0.0266074
Q9C7Y9	AT1G47970	_APEEDEEDS[Phospho]GDEDDDRPPKR_.3	2195929	4967636	5335470	7977150	7.83069e+06	7.86918e+06	1.89431	0.0198352
O48946	AT4G32410	_T[Phospho]TS[Phospho]GPLGPSDR_.2	1.2807e+06	1.43079e+06	1.44132e+06	2.59506e+06	2.55502e+06	2.74794e+06	1.90185	9.09105e-05
Q9FVW4	AT1G33980	_VVSANKPS[Phospho]PR_.2	262373	287430		455777	581241	544610	1.91781	0.0141873
Q9LFA4	AT3G52870	_TQALEFVNLS[Phospho]PK_.2	3.46611e+06	2987357	2675683	5887712	5.89061e+06	5.74217e+06	1.91918	0.000285539
Q940N7	AT4G05150	_EVS[Phospho]TLS[Phospho]DPGS[Phospho]PR_.2	473451	493769	575257	1.01411e+06	980455	971661	1.92303	0.000147367
Q9LFA4	AT3G52870	_TLS[Phospho]GGLGS[Phospho]PK_.2	2250523	2.17625e+06	2.09493e+06	4.04543e+06	4370617	4219540	1.93747	4.02131e-05
F4IDB3	AT1G72410	_NLS[Phospho]DLS[Phospho]LTDDSK_.2	374774	726432	648350	1.19638e+06	1.09578e+06	1.12079e+06	1.95075	0.00747329
Q8L778	AT5G09870	_SGLESET[Phospho]FSR_.2	464665	446776		908147	953277	884019	2.00813	0.000443988
O49595	AT3G51880	_NLEEGS[Phospho]DES[Phospho]EKSR_.2	746778	400020	982620	1411630	1257825	1.62118e+06	2.01493	0.0224585
A0A1P8ATC8	AT1G24764	_ALLNGPGNYS[Phospho]FNK_.2	2.48794e+06	2030995	1.9189e+06	4.60862e+06	3.98057e+06	4406698	2.01868	0.00100287
B3H4F6	AT2G43680	_TLS[Phospho]PKPPSPR_.2	1.27057e+06		1394054		2551062	2.83588e+06	2.02165	0.0127553
F4JKH6	AT4G28080	_STNFTS[Phospho]PR_.2	21133434	23569478	30383726	49196336	50688176	54418556	2.055	0.00114062
A0A1P8B9R0	AT5G18230	_NGAGLHS[Phospho]APSTPAGGR_.2	365234	303831	334579	672380	729582	699593	2.09393	0.000111985
Q9LDN6	AT3G15220	_APVESSGT[Phospho]VR_.2	175919	184911			405086	350702	2.09458	0.0189268
Q8W4N1	AT3G10980	_EEGS[Phospho]VNR_.2	164683	141850	180431	364888	348755	312459	2.10714	0.000714844
Q9ZQC5	AT2G37080	_TSESDPVSS[Phospho]PNTK_.2	567626	692994		1.21452e+06	1.37382e+06	1.49118e+06	2.15742	0.00764472
A0A1P8AUP4	AT1G27430	_S[Phospho]PTPVPMGNPSDPNPK_.2	520585	494727	562094		1.2323e+06	1.07823e+06	2.19716	0.00210974
A0A2H1ZEH5	AT3G04630	_IAAEET[Phospho]DEEFEVK_.2	1.21258e+06	702815	1.13409e+06	2.2406e+06	2.3882e+06	2.11433e+06	2.21124	0.00225067
A0A1P8B9R0	AT5G18230	_VGIPNQPQPSQPPS[Phospho]PIPANGSR_.3	1713325	1.74226e+06	1431218	3.60887e+06	4.15239e+06	3.53894e+06	2.31239	0.000603925
Q9SIN1	AT2G42580	_ELDLGS[Phospho]PVSTLMPR_.2	966239	784428	801078	2.32347e+06	1.90879e+06	1.75055e+06	2.3446	0.00317063
Q9FHZ3	AT5G53830	_LGLNS[Phospho]PVT[Phospho]PLR_.2	480351	687538	418048	1381361	1.26311e+06	1.12717e+06	2.37818	0.00266533
Q9C9X0	AT1G68060	_NS[Phospho]FTSNSTSVLK_.2		350787	342749	815392	852903	834765	2.40609	5.54516e-05
A0A1I9LPZ9	AT3G03380	_LGS[Phospho]QASMATESVMK_.2	113621	164814	147631	373128	337907	328312	2.4394	0.000546432
F4K6F1	AT5G62220	_KNS[Phospho]FNSLHSVGNR_.3	1.73933e+06	1.42527e+06	573504	3136723	3.0782e+06	3072734	2.48459	0.00607758
Q93W28	AT4G15545	_DVS[Phospho]KLEGFR_.2	140845	96678.4	31246.2	223386	226110	225535	2.51156	0.0131352
Q9FZ45	AT1G16860	_S[Phospho]GPIPGAPS[Phospho]R_.2	2.23132e+06	1.91456e+06	2036469	5.02334e+06	5.32038e+06	5191330	2.51281	1.58924e-05
Q9S814	AT5G03280	_DISSGYC[Carbamidomethyl]M[Oxidation]S[Phospho]PTAK_.2	232882		286837	714647	712025	682532	2.70557	0.000350995
Q9C5S1	AT3G55270	_AS[Phospho]PSLAER_.2		76824.6	91340.2	212469	231735	272976	2.84317	0.00724028
Q9ZVA7	AT1G78880	_SSGPQSGGVT[Phospho]R_.2	43667.8	39294.4	68090.9	96941.7	185817	147025	2.84525	0.027009
O48683	AT1G24160	_FSAFS[Phospho]PNK_.2	1.6605e+06	2457151	1.88392e+06	5.40759e+06	5747371	6097121	2.87459	0.000266803
F4HYR4	AT1G62330	_VQDLIHGGGGAS[Phospho]PVQSPTR_.3	118433	95478.6	162458		335370	391808	2.89813	0.00546537
Q93ZT6	AT5G57870	_GM[Oxidation]VSSGGPVS[Phospho]PGPVYPGGR_.3	396888	366678		1.1803e+06	1.0838e+06	1.11613e+06	2.95127	0.00029692
Q9SIN1	AT2G42580	_SHS[Phospho]GELSSPGSGM[Oxidation]PTTTR_.2	46082	22671.4	21987.6	97642.4	96767.7	78970	3.01275	0.00366276
Q93ZT6	AT5G57870	_GM[Oxidation]VSSGGPVS[Phospho]PGPVYPGGR_.2	5.42983e+06	5.0147e+06	4.86655e+06	16246749	15748073	15222060	3.08384	6.26121e-06
Q93ZT6	AT5G57870	_GMVSSGGPVS[Phospho]PGPVYPGGR_.2	4.18741e+06	4371943	4104811	13957691	13353415	13322505	3.20855	1.89875e-06
Q9FH24	AT5G49100	_NTT[Phospho]PNLGAIPSLLSVR_.2	33887.9	51741.7		137064	167662	110362	3.23166	0.0235931
F4JXM9	AT5G65950	_INLVDVGGGGLFS[Phospho]PR_.2	303461	273800	427203	925774	1.23502e+06	1.12535e+06	3.27154	0.00172745
A0A1P8BB14	AT5G42870	_SC[Carbamidomethyl]NYDSPS[Phospho]PR_.2	248158	149971	379173	779892	861201	908034	3.27946	0.00149428
Q9SLN1	AT2G23360	_S[Phospho]GS[Phospho]EVDIGIFR_.2	15878.2		11991.7	55626.4	41697.6		3.49208	0.0407205
B9DGQ5	AT1G09060	_T[Phospho]PPSVAVMDPTR_.2	8418.66	26809.8	8985.72	33508.6	51399.1	69888.4	3.50105	0.0383005
B3H497	AT3G06330	_SGTTSS[Phospho]PR_.2	211454	209230		692748	773213	788041	3.57197	0.000764321
F4JKH6	AT4G28080	_NGT[Phospho]PKPDASISSK_.2	261356	257527	280585	760744	960011	1.36367e+06	3.8581	0.0127352
F4IA48	AT1G78150	_KPHTSTADLLTWSEVPPPDS[Phospho]PSSASR_.3	1.44583e+06	2.13168e+06		9787842	8477075	8.11567e+06	4.916	0.00215861
Q8LLD0	AT1G80680	_FGLS[Phospho]DDEAEDIAMDDAPGLGDPVGLDGK_.3	76200.7	44340.4	18780.1	738949	595596	624577	14.0619	0.000204524
A0A1I9LTA1	AT3G48060	SAPSPGSGGNVSK	_S[Phospho]APSPGSGGNVSK_.2	1137300	509476	460719
A0A1P8ANH8	AT1G66880	NPTSTTISSSSNHSLLPSISNLANR	_NPTSTTISSSSNHSLLPSIS[Phospho]NLANR_.3	20686456	18038774	13349977
A4GSN8	AT1G79280	SPEKEEVQPETLATPTQSPSR	_SPEKEEVQPETLAT[Phospho]PTQS[Phospho]PSR_.3	1863424	1.70616e+06	1.65638e+06
F4I548	AT1G56460	EAVESDEGSTNGSFQGSNQVR	_EAVESDEGS[Phospho]T[Phospho]NGSFQGSNQVR_.3	70235	93504.5	52386.6
F4IXZ6	AT3G49590	TDAFGDNHQLSPPFSPSGSPSTPR	_TDAFGDNHQLS[Phospho]PPFSPSGSPSTPR_.3	2.27345e+06	857544	294674
F4K5Y4	AT5G43310	FSDSEPGSLSPLQR	_FS[Phospho]DS[Phospho]EPGS[Phospho]LS[Phospho]PLQR_.2	18757.9	1.23566	1
O23052	AT1G05150	ADNNNNNVDAFSDAGWSR	_ADNNNNNVDAFSDAGWS[Phospho]R_.2	990754	727026	854934
P10797	AT5G38420	LPLFGCTDSAQVLK	_LPLFGC[Carbamidomethyl]T[Phospho]DSAQVLK_.2	2.25147e+06	2.26312e+06	2.37397e+06
Q8GXW8	At1g04780	TPSQRPSTSSSSGGFNIGK	_TPS[Phospho]QRPSTSSSSGGFNIGK_.3	1.44349e+06	1.24182e+06	812172
Q93YP9	AT1G19450	QSSMLESSQVIR	_QSS[Phospho]M[Oxidation]LESSQVIR_.2	123502	130277	144993
Q9S713	AT1G68830	TVTETIDEISDGR	_T[Phospho]VTETIDEISDGR_.2	147497	165125	173771
Q9SHJ6	AT1G06530	SLNGEATGQDDESFFDSDQQGDDGK	_SLNGEATGQDDESFFDS[Phospho]DQQGDDGK_.3	552678	634991	652790
Q9SZP8	AT4G38710	GSFESLSR	_GSFES[Phospho]LSR_.2	174855	68876.2	178656
Q9ZVA7	AT1G78880	SSGPQSGGVTR	_SS[Phospho]GPQS[Phospho]GGVTR_.2	4199409	4.71223e+06	5582492
A0A1I9LRS8	AT3G13300	VFCSQVSNLSTEMAR	_VFC[Carbamidomethyl]S[Phospho]QVSNLSTEM[Oxidation]AR_.2	68654.8		48891.7
A0A1P8ARG8	AT1G18950	IDYQQYEFSDSDK	_IDYQQYEFS[Phospho]DS[Phospho]DK_.2	488189	137404
A0A1P8AXX8	AT2G34310	DSDGNLSSPGSQGNEEFGTR	_DSDGNLSS[Phospho]PGSQGNEEFGTR_.2		2.40682e+06	2570171
A0A1P8AXX8	AT2G34310	DSDGNLSSPGSQGNEEFGTR	_DS[Phospho]DGNLSSPGSQGNEEFGTR_.2		449477	269604
A0A1P8AYB1	AT2G17840	LIATGSGHLIK	_LIATGS[Phospho]GHLIK_.2	250737	167467
A0A1P8AZ84	AT2G39480	QKSNGSDPESPISPLLISDPQNER	_QKS[Phospho]NGS[Phospho]DPES[Phospho]PIS[Phospho]PLLISDPQNER_.3	158897		171978
A0A1P8B5D8	AT4G38550	IVSENSTPVHHNYQIVAAETYEQDK	_IVSENSTPVHHNY[Phospho]QIVAAETYEQDK_.3	348847		185555
A9LNK9	AT1G30460	GVSGDQQNQDASHDMEQFEVGNSLR	_GVS[Phospho]GDQQNQDASHDMEQFEVGNSLR_.3	262772		551974
B9DHK3	AT5G14540	DRNSPESAIISAIDR	_DRNSPES[Phospho]AIISAIDR_.3	74412.1	147656
F4HRE0	AT1G45688	FSGSLKPGSR	_FSGS[Phospho]LKPGSR_.2	2.15722e+06		93573.2
F4I420	AT1G76810	PASSTPVEEK	_PASST[Phospho]PVEEK_.2		227449	219540
F4I420	AT1G76810	DDENTIEDEESPEVTFSGK	_DDENTIEDEES[Phospho]PEVTFSGK_.2	721225	558947
F4I548	At1g56460	AFDDADYVKDDDEEEEEAVSDVELENK	_AFDDADYVKDDDEEEEEAVS[Phospho]DVELENK_.3		632044	526847
F4IHI1	AT2G21470	ETENVESEDDDIMEVENPMMVSK	_ETENVES[Phospho]EDDDIMEVENPM[Oxidation]MVSK_.3	238529		253354
F4IXZ6	AT3G49590	STSDALEELR	_STS[Phospho]DALEELR_.2	291256	243601
F4J9M5	AT3G06010	DSESDLSELDAPR	_DSES[Phospho]DLS[Phospho]ELDAPR_.2		498376	478384
F4JFU5	AT3G14350	KLDTSLSMNLRPPPSER	_KLDTSLS[Phospho]M[Oxidation]NLRPPPSER_.3	4.65654e+06	977602
F4K4Y5	AT5G55660	QHEGESETGDK	_QHEGES[Phospho]ETGDK_.2	67765.7	77745.5
F4K8S9	AT5G44180	GSGGSGVTVVR	_GS[Phospho]GGSGVTVVR_.2	64141.9		103233
O48683	At1g24160	EKVSPLLSK	_EKVS[Phospho]PLLSK_.2	85154.8	88847
O49160	AT3G56150	YLQSGSEDDDDTDTK	_YLQS[Phospho]GSEDDDDTDTK_.2	284663	281758
O65655	At4g39680	TSVGGGDDSNAANADMIK	_TSVGGGDDS[Phospho]NAANADM[Oxidation]IK_.2	266414		76382.8
P56757	ATCG00120	LIESPAPGIISR	_LIES[Phospho]PAPGIISR_.2	60831.6		57437.5
P93017	AT2G33830	TVAAVAGSPGTPTTPGSAR	_TVAAVAGS[Phospho]PGTPTTPGSAR_.2		23244602	26160140
Q42438	AT5G19450	SNPFYSEAYTTNGSGTGFK	_SNPFYSEAYTTNGS[Phospho]GTGFK_.2	1.96398e+06	1.71303e+06
Q680Q4	AT5G60410	SEANDGLVDNPLAFGR	_S[Phospho]EANDGLVDNPLAFGR_.2		68997.1	17084.9
Q6NLQ6	AT3G57530	FNSISLK	_FNS[Phospho]ISLK_.2	1.21041e+06		857379
Q8GXW8	At1g04780	HSTVETVVR	_HS[Phospho]TVETVVR_.2	171483	153115
Q8L6X7	At4g22290	KSGELGR	_KS[Phospho]GELGR_.2		14677.5	2364.29
Q8L7M3	AT5G23590	SGFQTPESNVDEK	_SGFQT[Phospho]PESNVDEK_.2		501478	554301
Q8LG95	AT4G21190	IDNEIESEEEDGEDLSEEEEDEK	_IDNEIES[Phospho]EEEDGEDLS[Phospho]EEEEDEK_.3		123442	242158
Q8RWY7	AT4G32420	EAESLHQGK	_EAES[Phospho]LHQGK_.2		75301.1	36692.3
Q8VZT4	AT1G29370	PLAPSTSSLSVAPAESEVR	_PLAPSTS[Phospho]SLSVAPAESEVR_.2		582447	414526
Q93YP9	At1g19450	QSSMLESSQVIR	_QSS[Phospho]M[Oxidation]LESS[Phospho]QVIR_.2	46001	78063.6
Q940N7	AT4G05150	ASSISSLLDSSVNR	_ASS[Phospho]IS[Phospho]S[Phospho]LLDSSVNR_.2		305731	249178
Q94BR1	AT5G63190	NDPNYDSGEDAYDGLVDSPVSDPLNDYK	_NDPNYDSGEDAY[Phospho]DGLVDSPVSDPLNDYK_.3	16958700		16223492
Q9C6N3	AT1G27850	GTSPVSSSR	_GTSPVSSS[Phospho]R_.2	145292	281445
Q9C7Y9	AT1G47970	AEDEEDASDFEPEENGVEEDIDEGEDDENDNSGGAGK	_AEDEEDAS[Phospho]DFEPEENGVEEDIDEGEDDENDNSGGAGK_.4		152341	96480.4
Q9C8K2	AT1G51500	VPSLSSLSSR	_VPS[Phospho]LSSLS[Phospho]SR_.2	2.75337e+06	2.42044e+06
Q9C977	AT1G80270	SDQEEDDLEDGFSELEGSK	_SDQEEDDLEDGFS[Phospho]ELEGSK_.2	424167		1
Q9CA42	AT1G68790	EQTSRITESEQAAGDSDEGVDSITTGGR	_EQTSRIT[Phospho]ES[Phospho]EQAAGDS[Phospho]DEGVDSITTGGR_.3	1.24051e+06	1107700
Q9FHD7	AT5G41260	EFSIETIR	_EFS[Phospho]IETIR_.2	877914	24991.2
Q9FKL6	AT5G57580	LTGSSGSSPK	_LTGS[Phospho]SGSS[Phospho]PK_.2	117135	123156
Q9FVQ1	AT1G48920	TPSTPAAGGSK	_TPS[Phospho]T[Phospho]PAAGGSK_.2	67324.5		128287
Q9FVW4	AT1G33980	NDSRPSQSSTFVQSEQR	_NDSRPSQSST[Phospho]FVQSEQR_.3		838344	826949
Q9LDN6	AT3G15220	EFSSNTNVSPLGR	_EFSS[Phospho]NTNVSPLGR_.2	1.0109e+06		1.04141e+06
Q9LE22	AT1G18210	VLEEVDTDR	_VLEEVDT[Phospho]DR_.2		92549.5	118107
Q9LFE4	AT5G16730	SELESQEEEEDSSK	_SELES[Phospho]QEEEEDS[Phospho]SK_.2	36034.9		53749
Q9S713	AT1G68830	LVKTVTETIDEISDGR	_LVKT[Phospho]VTET[Phospho]IDEISDGR_.2	16368834		6216441
Q9S7Z8	AT1G70940	LAPNSTAALQSK	_LAPNS[Phospho]TAALQSK_.2	69358.5		88753.7
Q9S814	AT5G03280	SLSGEGGSGTGSLSR	_S[Phospho]LSGEGGS[Phospho]GTGSLSR_.2	176209		213984
Q9SAD7	AT1G13020	SESSALNNVENVVK	_S[Phospho]ESSALNNVENVVK_.2	392789	353035
Q9SCK9	AT3G49490	SNADDVSTGR	_S[Phospho]NADDVS[Phospho]TGR_.2		195613	280125
Q9SCK9	AT3G49490	SLNSMDVDSDSENDQPQK	_SLNSM[Oxidation]DVDS[Phospho]DSENDQPQK_.2	88793.6	134588
Q9SCK9	AT3G49490	SLTDVGLDLSSR	_S[Phospho]LTDVGLDLSSR_.2	36633.2	21852.1
Q9SCQ6	AT3G50700	NLPGMPDPESEVIALSPK	_NLPGM[Oxidation]PDPESEVIALS[Phospho]PK_.2	396991		8918096
Q9SD79	AT5G08050	STATPQVK	_S[Phospho]TATPQVK_.2		232338	288293
Q9SHC8	AT2G45140	ASVSDNGNASDFTAAPR	_AS[Phospho]VSDNGNASDFTAAPR_.2		7.94878e+06	7.30384e+06
Q9SHJ6	AT1G06530	ASELETEVAR	_AS[Phospho]ELETEVAR_.2		38034.7	60972.1
Q9SUA1	AT4G26630	KTDDDSDTSPK	_KTDDDSDTS[Phospho]PK_.2	472732	571648
Q9XIE2	AT1G59870	NIEDIFSSGSR	_NIEDIFS[Phospho]SGS[Phospho]R_.2	1.10709e+06	932936
Q9XIE2	AT1G59870	RTQSVNDDEEALK	_RTQS[Phospho]VNDDEEALK_.2		1.00321e+06	904792
Q9ZNU3	AT2G46630	VLSPYSLPASLLHSER	_VLSPY[Phospho]SLPASLLHSER_.3	295609		2.6565e+06
Q9ZNU3	AT2G46630	SPYHSPPSR	_SPYHS[Phospho]PPSR_.2		486944	1.02314e+06
A0A1I9LPZ9	AT3G50370	LGSQASMATESVMK	_LGS[Phospho]QASM[Oxidation]ATESVMK_.2				75778.8	116297
A0A1I9LQ49	AT3G22380	SDPAIHDSQEK	_S[Phospho]DPAIHDSQEK_.2				95154.8	102654
A0A1I9LQ49	AT3G22380	ESNASLDSEKK	_ESNASLDS[Phospho]EKK_.2				48959.6	69506.5
A0A1I9LS11	AT3G09600	GLLNVSSPSTSGMGSSSR	_GLLNVSS[Phospho]PSTSGMGSSSR_.2				702233	102106
A0A1I9LTA1	At3g48060	SMNSPTTSQPK	_SM[Oxidation]NS[Phospho]PTTSQPK_.2				73203.7	135228
A0A1P8ARG8	At1g18950	STSSTHPTEPVNDTASGR	_STSSTHPTEPVNDTAS[Phospho]GR_.3				430712	378935
A0A1P8ASK1	AT1G79570	DGGGTGSIPPALENEQMK	_DGGGT[Phospho]GSIPPALENEQMK_.2				737633
A0A1P8ASK1	AT1G79570	TNSSLHEFGNK	_TNS[Phospho]S[Phospho]LHEFGNK_.2					128385
A0A1P8ATC8	AT1G24764	SMSNGPSR	_SMS[Phospho]NGPSR_.2				84087.4
A0A1P8AYB1	AT2G17840	EISHDSSDEEDGDGGK	_EISHDSS[Phospho]DEEDGDGGK_.2					350521
A0A1P8AZ84	AT2G39480	SQELCFNSEESPNDHSPAPEK	_SQELC[Carbamidomethyl]FNSEES[Phospho]PNDHSPAPEK_.3				2.98482e+06
A0A1P8B0X3	AT2G34680	SPESVSAVSVVSNR	_SPESVS[Phospho]AVS[Phospho]VVS[Phospho]NR_.2					275579
A0A1P8B770	AT4G17330	NTTASDMESDESAENR	_NTTASDMES[Phospho]DESAENR_.2					217107
A0A1P8B770	AT4G17330	SLVATPETPLQSR	_SLVATPET[Phospho]PLQSR_.2				298419	394444
A0A1P8BB14	AT5G42870	TEALAEDAVSGSDLDSK	_TEALAEDAVSGS[Phospho]DLDSK_.2					345799
A0A1P8BD90	AT5G53440	SVEAGSNLTSPAK	_S[Phospho]VEAGS[Phospho]NLT[Phospho]SPAK_.2				193069
A0A1P8BD90	AT5G53440	ELHASSPK	_ELHASS[Phospho]PK_.2				3.06361e+06	3.61133e+06
A0A2H1ZEH5	AT3G04630	SLSENAPNVGSAER	_SLSENAPNVGS[Phospho]AER_.2				290236	262171
A0A2H1ZEH5	AT3G04630	SLSENAPNVGSAER	_SLS[Phospho]ENAPNVGSAER_.2				189006
A0A2H1ZEJ0	At3g45850	GGIVSLSPAQTPR	_GGIVSLSPAQT[Phospho]PR_.2				289637	300413
A4GSN8	AT1G79280	EEVQPETLATPTQSPSR	_EEVQPETLAT[Phospho]PTQS[Phospho]PSR_.2					6.18847e+06
A8MR97	AT3G60240	TTSAPPNMDDQK	_TTS[Phospho]APPNMDDQK_.2				4.95418e+06	5415242
A8MR97	AT3G60240	TTSAPPNMDDQK	_TTS[Phospho]APPNM[Oxidation]DDQK_.2				494370	630935
B9DFN3	AT1G70100	STDDGQDTAPK	_S[Phospho]TDDGQDTAPK_.2				242415
B9DFW5	AT3G26910	VSPTASPPPASSPR	_VS[Phospho]PTASPPPASSPR_.2					593076
B9DFW5	AT3G26910	VSPTASPPPASSPR	_VSPTASPPPASS[Phospho]PR_.2				180191	196035
B9DGQ5	AT1G09060	TPPSVAVMDPTR	_T[Phospho]PPSVAVM[Oxidation]DPTR_.2				80503.8	2940.51
F4HYR4	AT1G62330	VQDLIHGGGGASPVQSPTR	_VQDLIHGGGGASPVQS[Phospho]PTR_.3				693188	565685
F4I420	At1g76810	GIDTSVQGEDEVEPK	_GIDTS[Phospho]VQGEDEVEPK_.2					2.19284e+06
F4IDB3	AT1G72410	SFFSLSTFR	_SFFSLST[Phospho]FR_.2				108223	86421.8
F4IHI1	AT2G21470	SEDEDIEQYGR	_S[Phospho]EDEDIEQYGR_.2				349791	4212.83
F4IXZ6	AT3G49590	FSGVLSSSDSPR	_FSGVLSSS[Phospho]DS[Phospho]PR_.2					615092
F4JC80	AT3G13225	SNDSTEVGSSATASK	_S[Phospho]NDSTEVGSSATASK_.2				35823.4	20369.4
F4JC80	AT3G13225	SAVMDEPETNKSPPK	_SAVMDEPETNKS[Phospho]PPK_.2				90605.7	109150
F4JEL4	AT3G13920	VHACVGGTSVR	_VHAC[Carbamidomethyl]VGGT[Phospho]SVR_.2				218896688
F4JFU5	AT3G14350	SVQNPPLVETK	_S[Phospho]VQNPPLVETK_.2				99677.6	126632
F4JI10	At4g01330	TEISPAVAETSESDSSK	_TEIS[Phospho]PAVAETSESDSSK_.2				1.06513e+06	512179
F4JI10	At4g01330	VVFSDRVSSGESR	_VVFSDRVS[Phospho]S[Phospho]GESR_.2				590360	545705
F4JNF8	At4g17240	TLSMVLR	_TLS[Phospho]MVLR_.2				8903.67	4627.35
F4JNF8	At4g17240	VDSAEESLSGR	_VDS[Phospho]AEESLSGR_.2				112398	127990
F4JXM9	AT5G65950	DPLSVSDSASPIPSR	_DPLSVSDSAS[Phospho]PIPSR_.2				735615	907560
F4K4Y5	AT5G55660	ESVESADNK	_ESVES[Phospho]ADNK_.2				234354
F4K6F1	AT5G62220	NSFNSLHSVGNR	_NS[Phospho]FNSLHSVGNR_.3				104247	19554.3
F4K703	AT5G21160	LSSSPQCTLSGSSPPVGSLPK	_LSSSPQC[Carbamidomethyl]TLSGSS[Phospho]PPVGSLPK_.2				7670294	7867990
F4K8S9	AT5G44180	PGHVYSPNLVEYDSPYQK	_PGHVYS[Phospho]PNLVEYDSPYQK_.3					1.24805e+06
O48847	AT2G32700	DGQQNANDGSIGSPMQSSSSK	_DGQQNANDGSIGS[Phospho]PM[Oxidation]QSSSSK_.3				154633	183525
O48946	AT4G32410	TPDTQSVR	_T[Phospho]PDTQSVR_.2					1.62793e+06
O48963	AT3G45780	ALSESTNLHPFMTK	_ALS[Phospho]ESTNLHPFMTK_.2				301358	167558
O48963	AT3G45780	RMSENVVPSGR	_RM[Oxidation]S[Phospho]ENVVPSGR_.3				118899	115779
O48963	AT3G45780	FLQGSGTDADELAK	_FLQGS[Phospho]GTDADELAK_.2					422690
O49160	AT3G56150	YLQSGSEDDDDTDTKR	_YLQS[Phospho]GS[Phospho]EDDDDT[Phospho]DTKR_.2				428132	471242
O49160	AT3G56150	TGGGGLDLSSR	_TGGGGLDLS[Phospho]SR_.2					45106.7
P93017	AT2G33830	TVAAVAGSPGTPTTPGSAR	_TVAAVAGSPGT[Phospho]PTTPGSAR_.2				21645150	22311364
P93758	AT2G41870	GYFSPPR	_GYFS[Phospho]PPR_.2					1.76075e+06
Q0WUY5	AT3G07660	SVEDATPSAEATSR	_SVEDAT[Phospho]PSAEATSR_.2				353182	270494
Q39023	AT3G45640	PTSENDFMTEYVVTR	_PTSENDFMT[Phospho]EYVVTR_.2				75513.1
Q39023	AT3G45640	PTSENDFMTEYVVTR	_PTSENDFM[Oxidation]T[Phospho]EY[Phospho]VVTR_.2				403380
Q56WH4	AT5G22650	PAAAPASTPQK	_PAAAPAST[Phospho]PQK_.2				188985
Q680Q4	AT5G60410	GQVSSDTSNLK	_GQVSS[Phospho]DTSNLK_.2				208562	226251
Q84WV4	AT4G01810	TGSPIPR	_TGS[Phospho]PIPR_.2				466142	530512
Q84WV4	AT4G01810	TPVPHSPPVVASPIPPR	_TPVPHS[Phospho]PPVVAS[Phospho]PIPPR_.3					368041
Q8L4D8	AT1G74690	STDSQNVAPVQDHSLSDAER	_STDSQNVAPVQDHS[Phospho]LSDAER_.3				1.62649e+06	1.75162e+06
Q8L4D8	AT1G74690	STDSQNVAPVQDHSLSDAER	_STDS[Phospho]QNVAPVQDHSLSDAER_.3				1.60593e+06
Q8L603	AT4G20300	SPPSPDQIEK	_SPPS[Phospho]PDQIEK_.2				3.11041e+06	2.90556e+06
Q8L6X7	AT4G22290	SGQLDHQLSNLASSK	_S[Phospho]GQLDHQLS[Phospho]NLASSK_.3				120863	133707
Q8L7M3	AT5G23590	SAFSPNPSAR	_SAFS[Phospho]PNPSAR_.2					31348.3
Q8LF20	AT2G25430	SYGDMTEMGGGGGGGGR	_S[Phospho]YGDM[Oxidation]TEMGGGGGGGGR_.2					2.42764e+06
Q8LF20	AT2G25430	SYGDMTEMGGGGGGGGR	_S[Phospho]YGDM[Oxidation]TEM[Oxidation]GGGGGGGGR_.2				1.75833e+06	2024427
Q8LG95	AT4G21190	QLNELSEGEGGLSSDEDK	_QLNELS[Phospho]EGEGGLS[Phospho]S[Phospho]DEDK_.2				1
Q8RWN5	AT5G04280	SGGGGAYPSSSTFDRY	_S[Phospho]GGGGAYPSSSTFDRY_.2				339651	313590
Q8RWN5	AT5G04280	AGAPYERPSR	_AGAPYERPS[Phospho]R_.2				473766	343719
Q8S3U9	AT1G76850	GSQSSGSPINAR	_GS[Phospho]QSSGSPINAR_.2				39131.2	16057.7
Q8S3U9	AT1G76850	GSQSSGSPINAR	_GSQS[Phospho]SGSPINAR_.2				211785	188927
Q8VZ31	AT1G04530	SEASLSIYCDSGDGFK	_SEAS[Phospho]LSIYC[Carbamidomethyl]DSGDGFK_.2				286028	335310
Q8VZ31	AT1G04530	DELGFEIERPPSPPMHLAAGLGIDK	_DELGFEIERPPS[Phospho]PPMHLAAGLGIDK_.3					204786
Q8VZT4	AT1G29370	PLAPSTSSLSVAPAESEVR	_PLAPSTSSLS[Phospho]VAPAESEVR_.2				171427	160694
Q8W4L5	AT2G30470	LMSPESTTTGHR	_LM[Oxidation]S[Phospho]PESTTTGHR_.2				161395	86902.8
Q8W4N1	AT3G10980	NMVSPNLVSPLPR	_NM[Oxidation]VSPNLVS[Phospho]PLPR_.2					51167.3
Q8W4N1	AT3G10980	NISGASSPSPSR	_NISGASSPS[Phospho]PSR_.2				827271	884558
Q93ZH7	AT5G03040	SNDDDSKSTISVLSER	_SNDDDSKS[Phospho]TIS[Phospho]VLSER_.2					2459817
Q93ZH7	AT5G03040	EQSNSNNDNAASVK	_EQS[Phospho]NS[Phospho]NNDNAASVK_.2					28166.7
Q93ZT6	AT5G57870	DGPGPLHSPAVSK	_DGPGPLHS[Phospho]PAVSK_.2				844728	923043
Q940P1	AT3G09760	VNFSPMSSPR	_VNFS[Phospho]PMSS[Phospho]PR_.2				349502	437666
Q949M4	AT4G28760	SKSVSDVR	_SKS[Phospho]VSDVR_.2				327359	348892
Q949M4	AT4G28760	ASFSPESSVCR	_AS[Phospho]FS[Phospho]PESSVC[Carbamidomethyl]R_.2				1
Q949W6	AT4G31430	LPWGSPAANNLDFR	_LPWGS[Phospho]PAANNLDFR_.2				236618
Q949W6	AT4G31430	NNPDFTEEDLLSAQQPSIQR	_NNPDFTEEDLLS[Phospho]AQQPSIQR_.3				84775.1
Q94BR1	AT5G63190	NDPNYDSGEDAYDGLVDSPVSDPLNDYK	_NDPNYDS[Phospho]GEDAYDGLVDSPVSDPLNDYK_.3				16472719	15051995
Q9C5S1	AT3G55270	AGSDDVGEWPHPPTPSGNK	_AGSDDVGEWPHPPT[Phospho]PSGNK_.3				1.64726e+06
Q9C9X0	AT1G68060	QSIGGSDNLQK	_QS[Phospho]IGGSDNLQK_.2				143629
Q9CA42	AT1G68790	IQEGPEGSLQSEMKSDKPR	_IQEGPEGS[Phospho]LQS[Phospho]EMKS[Phospho]DKPR_.3				165935	132249
Q9CAF4	AT3G10650	TLDECIASPAQLAK	_TLDEC[Carbamidomethyl]IAS[Phospho]PAQLAK_.2				391406	226871
Q9CAF4	AT3G10650	PLENGFVTPR	_PLENGFVT[Phospho]PR_.2					211332
Q9FH24	AT5G49100	VVGGGGSSSNR	_VVGGGGSSS[Phospho]NR_.2				200180	214535
Q9FHD7	AT5G41260	LSALCCVSESGR	_LSALC[Carbamidomethyl]C[Carbamidomethyl]VS[Phospho]ESGR_.2				338249
Q9FHK4	AT5G05190	EQGASSSSPFSENR	_EQGASSSS[Phospho]PFSENR_.2					786977
Q9FKA5	AT5G39570	SEEQEEGSYRK	_SEEQEEGS[Phospho]YRK_.2				155245	490468
Q9FMD7	AT5G16590	SIEAAPVPTSSAAVAK	_SIEAAPVPTSS[Phospho]AAVAK_.2					35865.4
Q9FRL3	AT1G75220	QSSMMGSSQVIR	_QSS[Phospho]M[Oxidation]M[Oxidation]GS[Phospho]SQVIR_.2				575492
Q9FVQ1	AT1G48920	PAFTPQSGNFR	_PAFT[Phospho]PQS[Phospho]GNFR_.2				52724.1	89611.9
Q9FVQ1	AT1G48920	NVSVPIDR	_NVS[Phospho]VPIDR_.2					20551.1
Q9FXI5	AT1G19870	TDIDSPDTTNTIK	_TDIDS[Phospho]PDT[Phospho]TNT[Phospho]IK_.2					617673
Q9FXI5	AT1G19870	DATSMGTVEDPK	_DATS[Phospho]M[Oxidation]GTVEDPK_.2				161211
Q9FY54	AT5G11110	SGSNNGVDTNLDAEDR	_S[Phospho]GS[Phospho]NNGVDTNLDAEDR_.2				1	6883.87
Q9FZ45	AT1G16860	MSGSLASAGSVSMK	_M[Oxidation]S[Phospho]GSLASAGSVS[Phospho]M[Oxidation]K_.2				150442
Q9LFE4	AT5G16730	KQPEEENGELSESEKDYDLLPK	_KQPEEENGELS[Phospho]ESEKDYDLLPK_.3				2.67107e+06
Q9LFE4	AT5G16730	QPEEENGELSESEK	_QPEEENGELS[Phospho]ESEK_.2				351965	367472
Q9LIM5	AT3G15095	SGSGYENSNNNNNNNIEPSSPK	_SGSGYENSNNNNNNNIEPSS[Phospho]PK_.3				345479
Q9LIM5	AT3G15095	MSICSPPK	_M[Oxidation]SIC[Carbamidomethyl]S[Phospho]PPK_.2				141227	194918
Q9LYR0	AT5G13460	SFDTQSESYSPYK	_SFDTQS[Phospho]ESYSPYK_.2					278696
Q9LYR0	AT5G13460	SFDTQSESYSPYK	_S[Phospho]FDTQSESYSPYK_.2					195994
Q9LZ71	AT5G04550	VEASDVSSADSDFIGR	_VEAS[Phospho]DVS[Phospho]SADS[Phospho]DFIGR_.2				1086476	1.71175e+06
Q9LZ71	AT5G04550	VEASDVSSADSDFIGR	_VEAS[Phospho]DVSSADSDFIGR_.2				72288.5
Q9LZ71	AT5G04550	VEASDVSSADSDFIGR	_VEASDVS[Phospho]SADS[Phospho]DFIGR_.2				610422
Q9LZ71	AT5G04550	ALQECTSSKTLEK	_ALQEC[Carbamidomethyl]TSS[Phospho]KT[Phospho]LEK_.2					352248
Q9LZ71	AT5G04550	FTGPASGSAATR	_FT[Phospho]GPASGSAATR_.2				24454.9
Q9M2D8	AT3G61260	VTTPAPADTPAPAPAEIPAPAPAPTPADVTK	_VTTPAPADT[Phospho]PAPAPAEIPAPAPAPTPADVTK_.3					532751
Q9S7Z8	AT1G70940	GPTPRPSNFEENCAMASSPR	_GPTPRPS[Phospho]NFEENC[Carbamidomethyl]AMASSPR_.3				54587.7	37230.7
Q9SGN6	AT1G28380	SGVFSMISTR	_S[Phospho]GVFSMIS[Phospho]TR_.2				222546	181689
Q9SHI0	AT1G17210	SDPFSEGNEQVMAFPGAR	_S[Phospho]DPFS[Phospho]EGNEQVMAFPGAR_.2				213003	227682
Q9SHI0	AT1G17210	ADSVEGTVVDRDGDEVNDDSAGPSK	_ADS[Phospho]VEGTVVDRDGDEVNDDSAGPSK_.3				128212
Q9SLN1	AT2G23360	QVSEAEK	_QVS[Phospho]EAEK_.2					44223.7
Q9SUA1	AT4G26630	TTSLEKPSEAMAGK	_TTS[Phospho]LEKPSEAMAGK_.2				482449	311074
Q9SVW8	AT4G35470	SDSQSSLNFSER	_SDS[Phospho]QSS[Phospho]LNFSER_.2					113283
Q9SVW8	AT4G35470	KQSSMEIV	_KQSS[Phospho]MEIV_.2				101900
Q9SX98	AT1G47670	FLSPIGTPMK	_FLS[Phospho]PIGTPMK_.2				1
Q9ZNU3	AT2G46630	LQSSSSSSSDEGEGK	_LQSSSSSS[Phospho]SDEGEGK_.2				106280
Q9ZQC5	AT2G37080	TPVNEIQK	_T[Phospho]PVNEIQK_.2				191863
Q9ZVD1	AT2G27090	EESRDSDDDEFDEPTSDTLVR	_EESRDS[Phospho]DDDEFDEPTSDTLVR_.3					644947
Q9ZVD1	AT2G27090	EEDGTPEEEDDGEDFSFQER	_EEDGT[Phospho]PEEEDDGEDFS[Phospho]FQER_.3				127956
