# Supplementary material for: Protein Phosphorylation Changes During Systemic Acquired Resistance in Arabidopsis thaliana
Source: Front Plant Sci. 2021 Nov 11;12:748287. doi: 10.3389/fpls.2021.748287 (PMC8632492; doi:10.3389/fpls.2021.748287)
Supplement: Supplementary Table 5 — Differentially phosphorylated TFs in SL-V vs. SL-CK. [file Table_5.XLSX]

## Sheet: Sheet1
Accession number	Gene name	Protein description	Phosphopeptides	Fold change in SL-V vs. SL-CK	P value
Q9SAH7	WRKY40	Probable WRKY transcription factor 40	DQIS[Phospho]PPK	0.102957	0.040749
Q9SAH7	WRKY40	Probable WRKY transcription factor 40	DQIS[Phospho]PPKK	0.289113	0.000234126
A0A1P8B913	WRKY18	WRKY transcription factor 18	QS[Phospho]PEIEQTDIPIK	0.361975	0.000209954
Q9C519	WRKY6	WRKY transcription factor 6	EES[Phospho]PETESNK	0.642657	0.00506239
A0A1P8AR93	WRKY57	Probable WRKY transcription factor 57	DNNAPS[Phospho]PR	1.55345	0.0331833
Q39204	MYC2	Transcription factor MYC2	SSS[Phospho]PPFSTPADQEYR	0.555151	0.000130029
Q39204	MYC2	Transcription factor MYC2	VLS[Phospho]FGDK	0.401377	0.0033222
Q39204	MYC2	Transcription factor MYC2	S[Phospho]GEILNFGDEGK	0.250718	0.032241
Q6R032	MYB3R-5	Transcription factor MYB3R-5	S[Phospho]PEIATPATVSSFPR	unique in SL-V	/
P92948	MYBCDC5	CELL DIVISION CYCLE 5	DGSSFSM[Oxidation]T[Phospho]PK	0.660011	0.0389475
Q9ASQ2	MAMYB	Transcription factor MAMYB	VGYGQILEPEQIHDESST[Phospho]DNER	unique in SL-V	/
Q9S7U5	HSFA8	Heat stress transcription factor A-8	LLLLS[Phospho]PSR	0.547258	0.0137531
Q8LG05	STKL1	Transcription factor STKL1	VKDES[Phospho]VLVK	0.58107	0.0117297
B3H6L9	SRA1	Transcription activator	DAGET[Phospho]PEASGSYSDYEK	0.596909	0.0219213
O48847	MUM1	Transcriptional corepressor LEUNIG_HOMOLOG	DGQQNANDGSIGS[Phospho]PM[Oxidation]QSSSSK	unique in SL-V	/
O48847	MUM1	Transcriptional corepressor LEUNIG_HOMOLOG	TEVNLGTS[Phospho]PR	1.66055	6.45906e-05
O48847	MUM1	Transcriptional corepressor LEUNIG_HOMOLOG	DGQQNANDGSIGS[Phospho]PMQSSSSK	1.5221	0.0434435
Q9C6K3	DF1	Trihelix transcription factor DF1	S[Phospho]PPPQPPAPLPQPIQAVVSTLDTTK	1.52629	0.00252976
Q9STF2	PTAC16	Protein PLASTID TRANSCRIPTIONALLY ACTIVE 16, chloroplastic	LGSQFAT[Phospho]AIQNASETPK	1.53781	0.0142945
Q04088	BZIP59	Probable transcription factor PosF21	SPAPPC[Carbamidomethyl]GGLPPPS[Phospho]PSGR	1.66614	2.94625e-05
A0A1P8B569	/	Winged-helix DNA-binding transcription factor family protein	ISGNHGSPTASVAQS[Phospho]PR	1.84543	0.000803323
Q9FVW4	UPF3	Regulator of nonsense transcripts UPF3	VVSANKPS[Phospho]PR	1.91781	0.0141873
A0A1P8B9R0	NOT3	Transcription regulator NOT2/NOT3/NOT5 family protein	NGAGLHS[Phospho]APSTPAGGR	2.09393	0.000111985
F4JUD	LEUNIG	Transcriptional corepressor LEUNIG	SEINPVLT[Phospho]PR	5.07367	3.80027e-05
A0A1I9LS77	/	Global transcription factor group E8	PSNS[Phospho]SLQR	unique in SL-CK	/
A0A1P8API4	/	Transcription initiation factor TFIID subunit 2	M[Oxidation]T[Phospho]AS[Phospho]IGS[Phospho]VK	unique in SL-CK	/
F4ICK7	IWS1	Transcription elongation factor (TFIIS) family protein	TM[Oxidation]DDDNFIDDTGLDPS[Phospho]ER	unique in SL-CK	/
F4K8S9	RLT2	Homeodomain-like transcriptional regulator	GS[Phospho]GGSGVTVVR	unique in SL-CK	/
Q8H1G0	GATA28	GATA transcription factor 28	AS[Phospho]PQTAQNLPLNK	unique in SL-CK	/
Q9C690	FBH3	Transcription factor bHLH122	SLS[Phospho]DIEQLLSDSIPC[Carbamidomethyl]K	unique in SL-CK	/
Q9FYG2	/	Calmodulin-binding transcription activator 4	VLS[Phospho]M[Oxidation]SNSPEAR	unique in SL-CK	/
Q9LNC4	/	Transcription factor GTE4	NPIEAPSQTLS[Phospho]LEDGDTLVVDK	unique in SL-CK	/
A0A1P8ARB7	NOT1	Transcription regulator	SGS[Phospho]SESLQQLIDIIR	unique in SL-V	/
A0A1P8AT29	/	Transcription initiation factor TFIID subunit 6b	KAS[Phospho]SDNLTHQPPLK	unique in SL-V	/
A0A1P8B350	/	Transcription coactivato	S[Phospho]PETDTLGK	unique in SL-V	/
A0A1P8B7M4	/	Mediator of RNA polymerase II transcription subunit-like protein	ELVAS[Phospho]DPSS[Phospho]PQAAER	unique in SL-V	/
A0A1P8BH90		Mediator of RNA polymerase II transcription subunit;Mediator of RNA polymerase II transcription subunit 30	ASEMQNGLGS[Phospho]PESEDEIEK	unique in SL-V	/
Q58G10	ADA1E	Transcriptional regulator of RNA polII, SAGA, subunit	DRPS[Phospho]PLGSNGK	unique in SL-V	/
Q84LG2	bZIP68	bZIP transcription factor 68	DGETAS[Phospho]ESGGSAHGPPR	unique in SL-V	/
Q8GUP3	PDS5C	Transcriptional regulator	TSGDETANVSS[Phospho]PSM[Oxidation]AEELPEQSVPK	unique in SL-V	/
Q8VZM2	/	Transcription elongation factor (TFIIS) family protein	VPS[Phospho]GDLR	unique in SL-V	/
Q8W4L5	VAL1	B3 domain-containing transcription repressor VAL1	LM[Oxidation]S[Phospho]PESTTTGHR	unique in SL-V	/
Q94BP0	/	Probable transcriptional regulator SLK2	SAS[Phospho]INNESYM[Oxidation]R	unique in SL-V	/
Q9CAA4	BIM2	Transcription factor BIM2	ANQGLTHEEPS[Phospho]SK	unique in SL-V	/
Q9FJR0	UPF1	Regulator of nonsense transcripts 1 homolog	GEGGAAADHHSEASS[Phospho]PSSLSAGAGNGAK	unique in SL-V	/
Q9MA75	VIP1	Transcription factor VIP1	FIATSS[Phospho]GEK	unique in SL-V	/
Q9SLB9	VOZ2	Transcription factor VOZ2	QELDNS[Phospho]PSTK	unique in SL-V	/
Q9STN3	SPT5-2	Putative transcription elongation factor SPT5 homolog 1	AYEAPTPGSGWAS[Phospho]T[Phospho]PGGSYSDAGTPR	unique in SL-V	/
