# Supplementary material for: Protein Phosphorylation Changes During Systemic Acquired Resistance in Arabidopsis thaliana
Source: Front Plant Sci. 2021 Nov 11;12:748287. doi: 10.3389/fpls.2021.748287 (PMC8632492; doi:10.3389/fpls.2021.748287)
Supplement: Supplementary Table 6 — Differentially phosphorylated kinases in SL-V vs. SL-CK. [file Table_6.XLSX]

## Sheet: Sheet1
Accession number	Gene name	Protein description	Phosphopeptides	Fold change in SL-V vs. SL-CK	P value
Q9C5E5	DGK5	Diacylglycerol kinase 5	FGAADT[Phospho]FK	0.30489	0.0023409
Q42479	CDPK6	Calcium-dependent protein kinase 3	GSS[Phospho]GSGTVGSSGSGTGGSR	0.353167	0.0286308
Q6NLQ6	CDPK32	Calcium-dependent protein kinase 32	FNSIS[Phospho]LK	0.362651	0.049345
Q39086	ARK1	Receptor-like serine/threonine-protein kinase SD1-7	SQDSLINDVVVS[Phospho]R	0.366839	0.0445243
Q9SII6	PBL32	Probable serine/threonine-protein kinase PIX13	S[Phospho]ENVLGEGGFGK	0.367252	0.0083109
A0A1P8ANH8	/	Protein kinase superfamily protein;Protein kinase superfamily protein;LEAF RUST 10 DISEASE-RESISTANCE LOCUS RECEPTOR-LIKE PROTEIN KINASE-like 1.4	S[Phospho]PDVVDIEC[Carbamidomethyl]GGGDDVGLLR	0.411209	0.00814297
A0A2H1ZE50	/	Lectin-domain containing receptor kinase VI.3	VSS[Phospho]SSVISGR	0.446704	0.0329406
Q9FKL3	/	Kinase superfamily with octicosapeptide/Phox/Bem1p domain-containing protein	T[Phospho]LVS[Phospho]GGVR	0.449756	0.0347133
Q9MAM1	PKS6	CBL-interacting serine/threonine-protein kinase 9	TGGDT[Phospho]LEFHK	0.512369	0.0269835
Q9C5S9	CRK6	Cysteine-rich receptor-like protein kinase 6	DPLDS[Phospho]DQSTTTK	0.522637	0.0118929
Q9ZSA2	CDPK21	Calcium-dependent protein kinase 21	EVIS[Phospho]EVDTDNDGR	0.522897	0.00172426
Q9LSI9	BIR2	BAK1-INTERACTING RECEPTOR-LIKE KINASE 2	S[Phospho]GLTEVGVSGLAQR	0.539755	0.00947181
F4HVH9	RAF11	PAS domain-containing protein tyrosine kinase family protein	GLS[Phospho]WPWK	0.54751	0.00648529
A0A1P8ANH8	/	Protein kinase superfamily protein;Protein kinase superfamily protein;LEAF RUST 10 DISEASE-RESISTANCE LOCUS RECEPTOR-LIKE PROTEIN KINASE-like 1.4	SLPITSYS[Phospho]SR	0.567066	0.00945915
Q8W4I7	CDPK13	Calcium-dependent protein kinase 13	VLS[Phospho]DVPK	0.578148	0.00451346
Q9SKB2	SOBIR1	Leucine-rich repeat receptor-like serine/threonine/tyrosine-protein kinase SOBIR1	DADELT[Phospho]DEDSK	0.592858	0.0036282
P0C5E2	LRK10L1.2	LEAF RUST 10 DISEASE-RESISTANCE LOCUS RECEPTOR-LIKE PROTEIN KINASE-like 1.2	S[Phospho]GPLVAQSPDSVIVK	0.603367	0.000171869
O64768	/	Kinase superfamily with octicosapeptide/Phox/Bem1p domain-containing protein	S[Phospho]EDHVENNLSAK	0.60453	0.0462616
F4K0Z2	CDPK7	Calcium-dependent protein kinase 7	DGS[Phospho]LQLEGET	0.609215	0.0239059
Q42438	CDPK8	Calcium-dependent protein kinase 8	EGS[Phospho]LQLEGEN	0.614377	0.000715107
Q38871	CDPK5	Calcium-dependent protein kinase 5	NSLNIS[Phospho]MR	0.630475	0.00912917
Q9FKL3	/	Kinase superfamily with octicosapeptide/Phox/Bem1p domain-containing protein	LGS[Phospho]GDGFTR	0.64278	7.91896e-05
P0C5E2	LRK10L1.2	LEAF RUST 10 DISEASE-RESISTANCE LOCUS RECEPTOR-LIKE PROTEIN KINASE-like 1.2	S[Phospho]GPLVAQS[Phospho]PDSVIVK	0.653664	0.0100481
Q9FE20	PBS1	Serine/threonine-protein kinase PBS1	LNPVDES[Phospho]NHGQK	1.52553	0.00769288
Q9SJQ1	PXC1	Leucine-rich repeat receptor-like protein kinase PXC1	AS[Phospho]AEMLGK	1.54438	0.0199475
Q8LEB6	/	Probable receptor-like protein kinase At5g18500	S[Phospho]GS[Phospho]FNHLEK	1.56236	8.2317e-05
Q8L603	/	Serine/Threonine-kinase, putative (DUF1639)	VS[Phospho]PDC[Carbamidomethyl]LPLTNGGK	1.65559	0.00871077
Q93Y06	/	Probable inactive receptor kinase At5g67200	IPNS[Phospho]GNLVFC[Carbamidomethyl]GESR	1.66654	0.00180219
F4IB81	LYK3	LysM domain receptor-like kinase 3	TGEGEISVT[Phospho]K	1.73229	0.00128336
Q9SAH3	/	Putative receptor-like protein kinase At1g80870	GENS[Phospho]VHDR	1.73277	0.0280339
Q9LTC0	PBL19	Probable serine/threonine-protein kinase PBL19	SETSSFNLQT[Phospho]PR	1.73826	0.0242165
Q9FMD7	LRR1	Leucine-rich repeat protein kinase family protein	S[Phospho]IEAAPVPTSSAAVAK	1.79683	0.0128353
Q9CAI5	CKL2	Casein kinase 1-like protein 2	NS[Phospho]PIVS[Phospho]SEINK	1.80187	0.00335011
F4I854	/	Protein kinase superfamily protein	FSNS[Phospho]MAPTR	1.89786	0.0263338
O80345	/	Cyclin-dependent kinase F-1	ILMEHDIVAS[Phospho]DENQQAYK	1.94695	0.0258146
F4I7B6	ASK1	Protein kinase superfamily protein	EVHAS[Phospho]GEVR	2.01615	0.0427702
Q9LDN6	/	MAP kinase	APVESSGT[Phospho]VR	2.09458	0.0189268
F4JVX7		AGC (cAMP-dependent, cGMP-dependent and protein kinase C) kinase family protein;AGC (cAMP-dependent, cGMP-dependent and protein kinase C) kinase family protein	FDEVNS[Phospho]PAPER	2.168	0.0425763
Q8LPJ1	CKL6	Casein kinase 1-like protein 6	S[Phospho]FELLSIR	2.2068	0.000924917
Q1PDV6	PBL27	Serine/threonine-protein kinase PBL27	SLGDGSSLDS[Phospho]PAETR	2.32443	9.68395e-05
Q9ZUS8	MAKR3	Probable membrane-associated kinase regulator 3	AAADVLS[Phospho]PR	2.39045	0.0263876
Q9LFH9	LECRK-VIII.1	L-type lectin-domain containing receptor kinase VIII.1	SDS[Phospho]FASEIIK	2.40026	0.00605502
A0A1I9LRW0	/	Mitogen-activated protein kinase	SQLT[Phospho]TIYR	7.95144	0.00411749
A0A1P8ANH8	/	Protein kinase superfamily protein;Protein kinase superfamily protein;LEAF RUST 10 DISEASE-RESISTANCE LOCUS RECEPTOR-LIKE PROTEIN KINASE-like 1.4	NPTSTTISSSSNHSLLPSIS[Phospho]NLANR	unique in SL-CK	/
O64903	NDPK2	Nucleoside diphosphate kinase II, chloroplastic	NIVHGS[Phospho]DSPENGK	unique in SL-CK	/
Q9M9T4	PKS2	Protein PHYTOCHROME KINASE SUBSTRATE 2	NSS[Phospho]C[Carbamidomethyl]NSYFQEK	unique in SL-CK	/
Q9S713	STN7	Serine/threonine-protein kinase STN7, chloroplastic	T[Phospho]VTETIDEISDGR	unique in SL-CK	/
A0A1P8AP18	/	Protein kinase superfamily protein;Proline-rich receptor-like protein kinase PERK9	SDS[Phospho]AFFR	unique in SL-CK	/
A0A1P8B1R2	MRI	Protein kinase superfamily protein;Protein kinase superfamily protein;Probable protein kinase At2g41970;PTI1-like tyrosine-protein kinase 1;Protein kinase superfamily protein	ALIGEGS[Phospho]YGR	unique in SL-CK	/
O64639	/	Receptor-like serine/threonine-protein kinase At2g45590	VKS[Phospho]EDFDTR	unique in SL-CK	/
O80939	LECRK-IV.1	L-type lectin-domain containing receptor kinase IV.1	GFTGGSS[Phospho]IADSQLSGGR	unique in SL-CK	/
P43288	SK11	Shaggy-related protein kinase alpha	[Acetyl (Protein N-term)]AS[Phospho]VGIAPNPGAR	unique in SL-CK	/
Q42438	CDPK8	Calcium-dependent protein kinase 8	SNPFYSEAYTTNGS[Phospho]GTGFK	unique in SL-CK	/
Q6NLQ6	CDPK32	Calcium-dependent protein kinase 32	FNS[Phospho]ISLK	unique in SL-CK	/
Q8RWL6	STY17	Serine/threonine-protein kinase STY17	AVVASITKES[Phospho]PR	unique in SL-CK	/
Q9C562	CIPK10	CBL-interacting serine/threonine-protein kinase 10	QDGLLHTTC[Carbamidomethyl]GT[Phospho]PAYVAPEVINR	unique in SL-CK	/
Q9C9Y8	/	Probable inactive receptor kinase At3g08680	EEWT[Phospho]GEVFDVELIK	unique in SL-CK	/
Q9FHD7	BSK8	Serine/threonine-protein kinase BSK8	EFS[Phospho]IETIR	unique in SL-CK	/
Q9FIU5	CRLK1	Calcium/calmodulin-regulated receptor-like kinase 1	S[Phospho]ATIPIR	unique in SL-CK	/
Q9LDN6	/	MAP kinase	EFSS[Phospho]NTNVSPLGR	unique in SL-CK	/
Q9LET1	CRK7	CDPK-related kinase 7	S[Phospho]ESGIFR	unique in SL-CK	/
Q9S713	STN7	Serine/threonine-protein kinase STN7, chloroplastic	LVKT[Phospho]VTET[Phospho]IDEISDGR	unique in SL-CK	/
Q9XID0	/	Putative 1-phosphatidylinositol-3-phosphate 5-kinase FAB1D	SLSGEC[Carbamidomethyl]SVDGNS[Phospho]C[Carbamidomethyl]DR	unique in SL-CK	/
A0A178US29	MUA22.21	Leucine-rich repeat protein kinase family protein	EATDDFDS[Phospho]SR	unique in SL-V	/
A0A178VCD6	/	Protein kinase superfamily protein	S[Phospho]LDEQLQR	unique in SL-V	/
A0A178W3M8	CIPK23	CBL-interacting protein kinase 23	SGGDT[Phospho]LEFHK	unique in SL-V	/
A0A1P8AP88	/	Protein kinase superfamily protein	NQS[Phospho]NLGPVR	unique in SL-V	/
A0A1P8APW9	/	Non-specific serine/threonine protein kinase	T[Phospho]AS[Phospho]ANS[Phospho]LVDAEEK	unique in SL-V	/
A0A1P8ASK1	/	Kinase superfamily with octicosapeptide/Phox/Bem1p domain-containing protein	DGGGT[Phospho]GSIPPALENEQMK	unique in SL-V	/
A0A1P8ASK1	/	Kinase superfamily with octicosapeptide/Phox/Bem1p domain-containing protein	TNS[Phospho]S[Phospho]LHEFGNK	unique in SL-V	/
A0A1P8AWI5	PERK15	Proline-rich receptor-like protein kinase PERK15	EDIEAS[Phospho]INR	unique in SL-V	/
A0A1P8AWJ5	PERK15	Mitogen-activated protein kinase kinase kinase ANP1	GPLGGS[Phospho]PSR	unique in SL-V	/
A0A1P8B509	DGK7	Diacylglycerol kinase (ATP);Diacylglycerol kinase 7	S[Phospho]VGEAS[Phospho]TTNFVAAR	unique in SL-V	/
A0A1P8BAP6	NEK3	NIMA-related kinase 3;Serine/threonine-protein kinase Nek3	S[Phospho]VSFGPSR	unique in SL-V	/
F4HPR9	ALPHA1	Protein kinase superfamily protein	SSS[Phospho]ASEDSISNLAEAK	unique in SL-V	/
F4HSC9	/	Protein kinase superfamily protein;Probable serine/threonine-protein kinase At1g01540	LLGSESSYVTT[Phospho]R	unique in SL-V	/
F4J6F6	IREH1	Probable serine/threonine protein kinase IREH1	SFS[Phospho]HELNSK	unique in SL-V	/
F4JI10	/	Protein kinase superfamily protein	TEIS[Phospho]PAVAETSESDSSK	unique in SL-V	/
F4JI10	/	Protein kinase superfamily protein	VVFSDRVS[Phospho]S[Phospho]GESR	unique in SL-V	/
O22558	STY8	Serine/threonine-protein kinase STY8	AVVASPS[Phospho]QENPR	unique in SL-V	/
Q0WR59	SIRK1	Probable inactive receptor kinase At5g10020	SSSGGS[Phospho]PLSSS[Phospho]PR	unique in SL-V	/
Q39023	MPK3	Mitogen-activated protein kinase 3	PTSENDFMT[Phospho]EYVVTR	unique in SL-V	/
Q39023	MPK3	Mitogen-activated protein kinase 3	PTSENDFM[Oxidation]T[Phospho]EY[Phospho]VVTR	unique in SL-V	/
Q39026	MPK6	Mitogen-activated protein kinase 6	VTSESDFM[Oxidation]T[Phospho]EYVVTR	unique in SL-V	/
Q56YP2	PIP5K1	Phosphatidylinositol 4-phosphate 5-kinase 1	M[Oxidation]GLS[Phospho]PFVLR	unique in SL-V	/
Q84WU5	MAP4K4	Protein kinase superfamily protein	S[Phospho]YSGSLYR	unique in SL-V	/
Q8GXZ3	PBL8	Probable serine/threonine-protein kinase PBL8	DEAAVFT[Phospho]PQAQAQQLQK	unique in SL-V	/
Q8L603	/	Serine/Threonine-kinase, putative (DUF1639)	SPPS[Phospho]PDQIEK	unique in SL-V	/
Q8LFN2	/	Probable inactive leucine-rich repeat receptor-like protein kinase At3g03770	LHVTTLES[Phospho]PR	unique in SL-V	/
Q9C660	PERK10	Proline-rich receptor-like protein kinase PERK10	TQSS[Phospho]APLVGNR	unique in SL-V	/
Q9FE52	SRPK3	Protein kinase superfamily protein	DAENVS[Phospho]QK	unique in SL-V	/
Q9FFH8	CKL7	Casein kinase 1-like protein 7	PSS[Phospho]AGGPSESR	unique in SL-V	/
Q9FHD7	BSK8	Serine/threonine-protein kinase BSK8	LSALC[Carbamidomethyl]C[Carbamidomethyl]VS[Phospho]ESGR	unique in SL-V	/
Q9FLW9	PKP1	Plastidial pyruvate kinase 2	SQS[Phospho]THNIQVR	unique in SL-V	/
Q9FMD7	LRR1	Probable inactive receptor kinase At5g16590	SIEAAPVPTSS[Phospho]AAVAK	unique in SL-V	/
Q9FNN1	/	Pyruvate kinase	GGS[Phospho]TANLVAK	unique in SL-V	/
Q9LJD8	MAP3KE1	MAP3K epsilon protein kinase 1	T[Phospho]PSSVSGNELAR	unique in SL-V	/
Q9SLD0	/	Leucine-rich repeat protein kinase family protein	AS[Phospho]AY[Phospho]VIGK	unique in SL-V	/
