# Supplementary material for: Protein Phosphorylation Changes During Systemic Acquired Resistance in Arabidopsis thaliana
Source: Front Plant Sci. 2021 Nov 11;12:748287. doi: 10.3389/fpls.2021.748287 (PMC8632492; doi:10.3389/fpls.2021.748287)
Supplement: Supplementary Table 7 — Differentially phosphorylated RLKs, CDPKs, and MAPKs. [file Table_7.XLSX]

## Sheet: Kinases
Classification	Accession number	Gene name	Protein description	Phosphopeptides	Fold change in SL-V vs. SL-CK	P value
RLKs family (receptor-like protein kinase)	Q39086	RK1	Receptor-like serine/threonine-protein kinase SD1-7	SQDSLINDVVVS[Phospho]R	0.366839	0.0445243
	A0A1P8ANH8	LRK10L-1.4	LEAF RUST 10 DISEASE-RESISTANCE LOCUS RECEPTOR-LIKE PROTEIN KINASE-like 1.4	SLPITSYS[Phospho]SR	0.567066	0.00945915
		LRK10L-1.4	LEAF RUST 10 DISEASE-RESISTANCE LOCUS RECEPTOR-LIKE PROTEIN KINASE-like 1.4	NPTSTTISSSSNHSLLPSIS[Phospho]NLANR	unique in SL-CK	/
	A0A1P8ANH8	LRK10L-1.4	LEAF RUST 10 DISEASE-RESISTANCE LOCUS RECEPTOR-LIKE PROTEIN KINASE-like 1.4	S[Phospho]PDVVDIEC[Carbamidomethyl]GGGDDVGLL	0.411209	0.00814297
	Q9C5S9	CRK6	Cysteine-rich receptor-like protein kinase 6	DPLDS[Phospho]DQSTTTK	0.522637	0.0118929
	Q9LSI9	BIR2	BAK1-INTERACTING RECEPTOR-LIKE KINASE 2	S[Phospho]GLTEVGVSGLAQR	0.539755	0.00947181
	Q9SKB2	SOBIR1	Leucine-rich repeat receptor-like serine/threonine/tyrosine-protein kinase SOBIR1	DADELT[Phospho]DEDSK	0.592858	0.0036282
	P0C5E2	LRK10L-1.2	LEAF RUST 10 DISEASE-RESISTANCE LOCUS RECEPTOR-LIKE PROTEIN KINASE-like 1.2	S[Phospho]GPLVAQSPDSVIVK	0.603367	0.000171869
	P0C5E2	LRK10L-1.2	LEAF RUST 10 DISEASE-RESISTANCE LOCUS RECEPTOR-LIKE PROTEIN KINASE-like 1.2	S[Phospho]GPLVAQS[Phospho]PDSVIVK	0.653664	0.0100481
	Q9SJQ1	PXC1	Leucine-rich repeat receptor-like protein kinase PXC1	AS[Phospho]AEMLGK	1.54438	0.0199475
	Q8LEB6	/	Probable receptor-like protein kinase At5g18500	S[Phospho]GS[Phospho]FNHLEK	1.56236	8.2317e-05
	F4IB81	LYK3	LysM domain receptor-like kinase 3	TGEGEISVT[Phospho]K	1.73229	0.00128336
	Q9SAH3	/	Putative receptor-like protein kinase At1g80870	GENS[Phospho]VHDR	1.73277	0.0280339
	A0A1P8AP18	PERK9	Protein kinase superfamily protein;Proline-rich receptor-like protein kinase PERK9	SDS[Phospho]AFFR	unique in SL-CK	/
	O64639	/	Receptor-like serine/threonine-protein kinase At2g45590	VKS[Phospho]EDFDTR	unique in SL-CK	/
	Q9FIU5	CRLK1	Calcium/calmodulin-regulated receptor-like kinase 1	S[Phospho]ATIPIR	unique in SL-CK	/
	A0A1P8APW9	LMK1	Probable LRR receptor-like serine/threonine-protein kinase At1g07650	T[Phospho]AS[Phospho]ANS[Phospho]LVDAEEK	unique in SL-V	/
	A0A1P8AWI5	PERK15	Proline-rich receptor-like protein kinase PERK15	EDIEAS[Phospho]INR	unique in SL-V	/
	Q8LFN2	/	Leucine-rich repeat protein kinase family protein	LHVTTLES[Phospho]PR	unique in SL-V	/
	Q9C660	PERK10	Proline-rich receptor-like protein kinase PERK10	TQSS[Phospho]APLVGNR	unique in SL-V	/
Calcium-dependent protein kinase family (CDPKs)	Q42479	CDPK6/CPK3	Calcium-dependent protein kinase 3	GSS[Phospho]GSGTVGSSGSGTGGSR	0.353167	0.0286308
	Q6NLQ6	CDPK32	Calcium-dependent protein kinase 32	FNS[Phospho]ISLK	unique in SL-CK	/
	Q6NLQ6	CDPK32	Calcium-dependent protein kinase 32	FNSIS[Phospho]LK	0.362651	0.049345
	Q9ZSA2	CDPK21	Calcium-dependent protein kinase 21	EVIS[Phospho]EVDTDNDGR	0.522897	0.00172426
	Q8W4I7	CDPK13	Calcium-dependent protein kinase 13	VLS[Phospho]DVPK	0.578148	0.00451346
	F4K0Z2	CDPK7	Calcium-dependent protein kinase 7	DGS[Phospho]LQLEGET	0.609215	0.0239059
	Q42438	CDPK8	Calcium-dependent protein kinase 8	SNPFYSEAYTTNGS[Phospho]GTGFK	unique in SL-CK	/
	Q42438	CDPK8	Calcium-dependent protein kinase 8	EGS[Phospho]LQLEGEN	0.614377	0.000715107
	Q38871	CDPK5	Calcium-dependent protein kinase 5	NSLNIS[Phospho]MR	0.630475	0.00912917
Mitogen-activated protein kinase family（MAPKs）	A0A1I9LRW0	MPK9	Mitogen-activated protein kinase 9	SQLT[Phospho]TIYR	7.95144	0.00411749
	Q39023	MPK3	Mitogen-activated protein kinase 3	PTSENDFM[Oxidation]T[Phospho]EY[Phospho]VVTR	unique in SL-V	/
	Q39023	MPK3	Mitogen-activated protein kinase 3	PTSENDFMT[Phospho]EYVVTR	unique in SL-V	/
	Q39026	MPK6	Mitogen-activated protein kinase 6	VTSESDFM[Oxidation]T[Phospho]EYVVTR	unique in SL-V	/
	A0A1P8AWJ5	ANP1	MAP KINASE KINASE KINASE 1	GPLGGS[Phospho]PSR	unique in SL-CK	/
	Q9LDN6	/	MAP kinase	APVESSGT[Phospho]VR	2.09458	0.0189268
	Q9LDN6	/	MAP kinase	EFSS[Phospho]NTNVSPLGR	unique in SL-CK	/
	Q9LJD8	M3KE1	MITOGEN-ACTIVATED PROTEIN KINASE KINASE KINASE 7	T[Phospho]PSSVSGNELAR	unique in SL-V	/
