# Supplementary material for: Protein Phosphorylation Changes During Systemic Acquired Resistance in Arabidopsis thaliana
Source: Front Plant Sci. 2021 Nov 11;12:748287. doi: 10.3389/fpls.2021.748287 (PMC8632492; doi:10.3389/fpls.2021.748287)
Supplement: Supplementary Table 8 — Differentially phosphorylated defense-related proteins and abiotic stress-related proteins. [file Table_8.XLSX]

## Sheet: Sheet1
Classification	Accession number	Gene name	Phosphopeptides	Fold change in SL-V vs. SL-CK	P value
Defense response-related proteins	Q6XMI3	BSMT1	FINTIPS[Phospho]LR	0.160729	0.00141576
	Q8VZC7	AT5G45510	S[Phospho]LPAAINVLAK	0.480041	0.0275744
	Q9C5E5	DGK5	FGAADT[Phospho]FK	0.30489	0.0023409
	Q39086	SDK1	SQDSLINDVVVS[Phospho]R	0.366839	0.0445243
	Q9LSI9	BIR2	S[Phospho]GLTEVGVSGLAQR	0.539755	0.00947181
	Q9LX93	RING1	AQS[Phospho]DLANYC[Carbamidomethyl]GSGR	0.540916	0.000305311
	Q8LLD0	NUP96	FGLS[Phospho]DDEAEDIAM[Oxidation]DDAPGLGDPVGLDGK	0.555696	0.00327365
	Q9FJK8	RPP8L4	DPTSTSTINAQS[Phospho]PSR	0.614423	0.0400066
	Q9FHK4	EDR4	EIVS[Phospho]DVEDHQR	0.63398	0.00522619
	Q9ZSD4	SYP121	LIS[Phospho]TGESER	0.659352	0.0226249
	Q9FE20	PBS1	LNPVDES[Phospho]NHGQK	1.52553	0.00769288
	F4IB81	LYK3	TGEGEISVT[Phospho]K	1.73229	0.00128336
	Q9C5S1	MKP1	C[Carbamidomethyl]PAAPLT[Phospho]PR	1.8878	0.0266074
	Q680Q4	SIZ1	S[Phospho]EANDGLVDNPLAFGR	unique in SL-CK	/
	Q9LKA4	UBA2C	LS[Phospho]PQDAR	unique in SL-CK	/
	O23066	CYP86A2	DQS[Phospho]YSETFLR	unique in SL-V	/
	Q8LGD5	MKS1	EPVVIYAVS[Phospho]PK	unique in SL-V	/
	Q941L0	CESA3	NTGPVS[Phospho]TQAASER	unique in SL-V	/
	Q9MA75	VIP1	FIATSS[Phospho]GEK	unique in SL-V	/
	Q39023	MPK3	PTSENDFMT[Phospho]EYVVTR	unique in SL-V	/
	Q39023	MPK3	PTSENDFM[Oxidation]T[Phospho]EY[Phospho]VVTR	unique in SL-V	/
	Q39026	MPK6	VTSESDFM[Oxidation]T[Phospho]EYVVTR	unique in SL-V	/
	P92948	MYBCDC5	DGSSFSM[Oxidation]T[Phospho]PK	0.660011	0.0389475
Abiotic stress-related proteins	Q6NLQ6	CPK32	FNSIS[Phospho]LK	0.362651	0.049345
	P25858	GAPC1	AAS[Phospho]FNIIPSSTGAAK	0.490205	0.000849415
	Q9XI93	/	VAGAS[Phospho]ADILDAAEK	0.495623	0.021089
	B9DHT4	ARIA	SM[Oxidation]ALSPVDAAPPS[Phospho]PTQR	0.50084	0.00116466
	Q9MAM1	CIPK9	TGGDT[Phospho]LEFHK	0.512369	0.0269835
	Q9S814	ERA3	SLSGEGGS[Phospho]GTGS[Phospho]LSR	0.594447	0.00488901
	Q9SGN6	NSL1	S[Phospho]GVFSM[Oxidation]ISTR	0.596035	0.00135109
	Q38858	CRT2	DAPAESDAEDEPEDDEGGDDS[Phospho]DSESK	0.601241	0.0415629
	Q9C8K2	ABCG12	VPSLS[Phospho]SLSSR	0.617458	0.0428942
	Q9SJQ9	FBA6	TVPAAVPAIVFLS[Phospho]GGQSEEEATR	0.637662	0.00454816
	Q6ICZ8	NACA3	IDLDKPEVEDDDDNDEDDS[Phospho]EDDDEAEGHDGEAGGR	0.638122	0.00166176
	Q06738	COR78	S[Phospho]PHSVEESPQSLGSTVVPVQK	0.656369	0.000445685
	O23569	/	NAS[Phospho]TSSLK	1.51001	0.049911
	Q9M339	/	TPLPDVVIIHS[Phospho]PK	1.65308	0.0345042
	Q9SUA1	DEK3	EEGTLVDEDKGT[Phospho]DMDEK	1.87203	0.0355354
	Q9C5S1	MKP1	C[Carbamidomethyl]PAAPLT[Phospho]PR	1.8878	0.0266074
	Q9LXC9	PPA6	VFFLDGS[Phospho]GK	unique in SL-CK	/
	P43288	SK11	[Acetyl (Protein N-term)]AS[Phospho]VGIAPNPGAR	unique in SL-CK	/
	Q8RWV3	RCY1	S[Phospho]GTESNSQPIVGDSSYER	unique in SL-CK	/
	Q8RXN0	ABCG11	NGTQNTTVAPDGLTQS[Phospho]PSLR	unique in SL-CK	/
	Q9C9A5	MYBL2	ALS[Phospho]PPSGMQHR	unique in SL-CK	/
	Q8LL04	CPL3	IVIEDS[Phospho]DDEK	unique in SL-V	/
	Q94AW8	J3	SAS[Phospho]PEDLKK	unique in SL-V	/
