# Supplementary material for: Protein Phosphorylation Changes During Systemic Acquired Resistance in Arabidopsis thaliana
Source: Front Plant Sci. 2021 Nov 11;12:748287. doi: 10.3389/fpls.2021.748287 (PMC8632492; doi:10.3389/fpls.2021.748287)
Supplement: Supplementary Table 9 — Comparative analyses of phosphoproteome data set related to stomata immunity and the current study. [file Table_9.XLSX]

## Sheet: Sheet1
Significantly changed phosphoproteins both in Pst DC3000 infected stoma at 30 min and in systemic leaves of Psm ES4326 inoculated plants			Significantly changed phosphoproteins both in Pst DC3000 infected stoma at 60 min and in systemic leaves of Psm ES4326 inoculated plants			Significantly changed phosphoproteins both in Pst DC3000 infected stoma at 180 min and in systemic leaves of Psm ES4326 inoculated plants
Accession Number	Protein Description		Accession Number	Protein Description		Accession Number	Protein Description
AT4G04210	plant UBX domain containing protein 4		AT5G57830	Protein of unknown function, DUF593		AT1G72500	unknown proteins
AT3G45780	phototropin 1		AT2G40890	cytochrome P450, family 98, subfamily A, polypeptide 3		AT4G28600	no pollen germination related 2
AT3G05200	RING/U-box superfamily protein		AT5G63950	chromatin remodeling 24		AT4G24680	modifier of snc1
AT5G56980	unknown protein		AT4G11740	Ubiquitin-like superfamily protein		AT3G01830	Calcium-binding EF-hand family protein
AT3G48195	Phox (PX) domain-containing protein		AT1G09060	Zinc finger, RING-type		AT5G28350	Quinoprotein amine dehydrogenase, beta chain-like; RIC1-like guanyl-nucleotide exchange factor
AT1G80930	MIF4G domain-containing protein / MA3 domain-containing protein		AT5G39570	unknown proteins		AT2G20960	Arabidopsis phospholipase-like protein (PEARLI 4) family
AT2G26280	CTC-interacting domain 7		AT2G35050	Protein kinase superfamily protein with octicosapeptide/Phox/Bem1p domain		AT3G01810	unknown proteins
AT2G26920	Ubiquitin-associated/translation elongation factor EF1B protein		AT1G08680	ARF GAP-like zinc finger-containing protein ZIGA4		AT5G09870	cellulose synthase 5 _x000D_ cellulose synthase A9 _x000D_ cellulose synthase family protein _x000D_ cellulose synthase 6
AT1G13020	eukaryotic initiation factor 4B2		AT2G20960	Arabidopsis phospholipase-like protein (PEARLI 4) family		AT5G42870	phosphatidic acid phosphohydrolase 2
AT5G16730	Plant protein of unknown function (DUF827)		AT3G45780	phototropin 1		AT1G62300	WRKY family transcription factor
AT1G67230	little nuclei1		AT5G04250	Cysteine proteinases superfamily protein		AT5G47430	DWNN domain, a CCHC-type zinc finger
AT2G37710	receptor lectin kinase		AT5G41950	Tetratricopeptide repeat (TPR)-like superfamily protein		AT5G40480	embryo defective 3012
AT1G17840	white-brown complex homolog protein 11		AT1G57700	Protein kinase superfamily protein		AT5G44100	casein kinase I-like 7
AT5G47430	DWNN domain, a CCHC-type zinc finger		AT4G17720	RNA-binding (RRM/RBD/RNP motifs) family protein		AT1G67890	PAS domain-containing protein tyrosine kinase family protein
AT3G01830	Calcium-binding EF-hand family protein _x000D_ Calcium-binding EF-hand family protein		AT3G13920	eukaryotic translation initiation factor 4A1 _x000D_ eif4a-2		AT4G33210	F-box family protein
AT5G49680	Golgi-body localisation protein domain ;RNA pol II promoter Fmp27 protein domain		AT3G46780	plastid transcriptionally active 16		AT1G48650	DEA(D/H)-box RNA helicase family protein
AT1G07650	Leucine-rich repeat transmembrane protein kinase		AT3G05380	DIRP ;Myb-like DNA-binding domain		AT5G47690	binding
AT1G68790	little nuclei3		AT1G52780	Protein of unknown function (DUF2921)		AT3G60240	eukaryotic translation initiation factor 4G
AT3G61260	Remorin family protein		AT4G15545	unknown protein		AT5G23080	SWAP (Suppressor-of-White-APricot)/surp domain-containing protein
AT2G41900	CCCH-type zinc finger protein with ARM repeat domain		AT2G26920	Ubiquitin-associated/translation elongation factor EF1B protein		AT1G56460	HIT zinc finger ;PAPA-1-like conserved region
AT5G03280	NRAMP metal ion transporter family protein		AT2G43160	ENTH/VHS family protein		AT1G17840	white-brown complex homolog protein 11
AT1G57700	Protein kinase superfamily protein		AT1G48920	nucleolin like 1		AT4G38580	farnesylated protein 6
AT3G48060	BAH domain ;TFIIS helical bundle-like domain		AT2G28150	Domain of unknown function (DUF966)		AT1G73960	TBP-associated factor 2 _x000D_ TBP-associated factor 2
			AT1G22530	PATELLIN 2 _x000D_ PATELLIN 1		AT3G09070	Protein of unknown function (DUF740)
			AT3G11820	syntaxin of plants 121		AT3G22380	time for coffee
			AT1G17360	COP1-interacting protein-related protein		AT5G56980	unknown protein
			AT1G17840	white-brown complex homolog protein 11		AT1G75310	auxin-like 1 protein
			AT3G52230	unknown protein		AT5G05190	Protein of unknown function (DUF3133)
			AT1G07650	Leucine-rich repeat transmembrane protein kinase		AT2G30470	high-level expression of sugar-inducible gene 2
			AT1G76850	exocyst complex component sec5		AT3G45850	P-loop containing nucleoside triphosphate hydrolases superfamily protein
			AT5G16730	Plant protein of unknown function (DUF827)		AT1G59910	Actin-binding FH2 (formin homology 2) family protein
			AT2G35110	transcription activators		AT1G58250	Golgi-body localisation protein domain ;RNA pol II promoter Fmp27 protein domain
			AT1G28380	MAC/Perforin domain-containing protein		AT5G60660	plasma membrane intrinsic protein 2;4
			AT3G18690	MAP kinase substrate 1		AT5G03780	TRF-like 10
			AT1G51450	TRAUCO		AT5G13300	ARF GTPase-activating protein
			AT3G61260	Remorin family protein		AT5G18500	Protein kinase superfamily protein
						AT1G68720	tRNA arginine adenosine deaminase
						AT1G09060	Zinc finger, RING-type;Transcription factor jumonji/aspartyl beta-hydroxylase
						AT5G22010	replication factor C1
						AT1G77840	Translation initiation factor IF2/IF5
						AT1G27850	unknown protein
						AT4G11790	Pleckstrin homology (PH) domain superfamily protein
						AT2G37080	ROP interactive partner 3
						AT5G54590	Protein kinase superfamily protein
						AT4G16280	RNA binding;abscisic acid binding
						AT2G35050	Protein kinase superfamily protein with octicosapeptide/Phox/Bem1p domain
						AT3G51120	DNA binding;zinc ion binding;nucleic acid binding
						AT3G53500	RNA-binding (RRM/RBD/RNP motifs) family protein with retrovirus zinc finger-like domain
						AT1G14840	microtubule-associated proteins 70-4
						AT1G67090	ribulose bisphosphate carboxylase small chain 1A
						AT5G60410	DNA-binding protein with MIZ/SP-RING zinc finger, PHD-finger and SAP domain
