# Supplementary material for: Protein Phosphorylation Changes During Systemic Acquired Resistance in Arabidopsis thaliana
Source: Front Plant Sci. 2021 Nov 11;12:748287. doi: 10.3389/fpls.2021.748287 (PMC8632492; doi:10.3389/fpls.2021.748287)
Supplement: Supplementary Table 11 — Differentially phosphorylated ABC transporter family proteins. [file Table_11.XLSX]

## Sheet: Sheet1
Description	Accession Number	Gene name	Phosphopeptides	Fold Change in SL-V vs. SL-CK	P value
ABC transporter family	AT1G59870	ABCG36/PEN3	DSAAEAS[Phospho]GGAGNK	0.495	0.00193967
	AT1G59870	ABCG36/PEN3	DSAAEAS[Phospho]GGAGNKK	0.5	0.000134035
	AT1G59870	ABCG36/PEN3	TQS[Phospho]VNDDEEALK	0.506862	4.39143e-06
	AT1G59870	ABCG36/PEN3	NIEDIFSSGS[Phospho]R	0.558228	0.0193797
	AT1G59870	ABCG36/PEN3	DS[Phospho]AAEASGGAGNK	0.605748	0.0338798
	AT1G59870	ABCG36/PEN3	NIEDIFS[Phospho]SGS[Phospho]R	unique in SL-CK	/
	AT1G59870	ABCG36/PEN3	RTQS[Phospho]VNDDEEALK	unique in SL-CK	/
	AT2G39480	ABCB6	QKS[Phospho]NGS[Phospho]DPES[Phospho]PIS[Phospho]PLLISDPQNER	unique in SL-CK	/
	AT2G39480	ABCB6	SQELC[Carbamidomethyl]FNSEES[Phospho]PNDHSPAPEK	unique in SL-V	/
	AT2G47800	ABCC4	TPTSPHASS[Phospho]PR	0.64	0.018495
	AT1G17840	ABCG11	NGTQNTTVAPDGLTQS[Phospho]PSLR	unique in SL-CK	/
	AT1G51500	ABCG12	VPSLS[Phospho]SLSSR	0.61	0.0428942
	AT3G62700	ABCC14	SIS[Phospho]IES[Phospho]PR	2	0.00014054
	AT3G55130	ABCG19	[Acetyl (Protein N-term)]MNLSLS[Phospho]GR	0.49	0.00308921
